# Supplementary material for: Integration of transcriptomics and metabolomics reveals the responses of the maternal circulation and maternal-fetal interface to LPS-induced preterm birth in mice
Source: Front Immunol. 2023 Aug 15;14:1213902. doi: 10.3389/fimmu.2023.1213902 (PMC10464907; doi:10.3389/fimmu.2023.1213902)
Supplement: Supplementary Table 2 — Differentially expressed genes. [file Table_2.xlsx]

## Sheet: LPS-U_vs_PBS-U.DEG
gene_id	LPS-U_readcount	PBS-U_readcount	log2FoldChange	pvalue	padj	LPS-1-U	LPS-2-U	LPS-3-U	LPS-4-U	PBS-1-U	PBS-2-U	PBS-3-U	PBS-4-U	symbol	description
ENSMUSG00000035042	4211.78	47.46	6.4709	0	0	3631	3918	4191	3680	43	56	60	52	Ccl5	chemokine (C-C motif) ligand 5 [Source:MGI Symbol;Acc:MGI:98262]
ENSMUSG00000028270	33393.5	1110.95	4.9102	1.3464e-176	1.9928e-172	28894	33020	34203	26145	1209	1052	1397	1221	Gbp2	guanylate binding protein 2 [Source:MGI Symbol;Acc:MGI:102772]
ENSMUSG00000078853	5072.16	340.23	3.8981	5.0947e-164	5.0271e-160	4372	5123	4788	4250	314	362	390	444	Igtp	interferon gamma induced GTPase [Source:MGI Symbol;Acc:MGI:107729]
ENSMUSG00000104713	1322.26	67.67	4.2917	5.1819e-140	3.8349e-136	1241	991	1378	1235	68	80	73	78	Gbp6	guanylate binding protein 6 [Source:MGI Symbol;Acc:MGI:2140937]
ENSMUSG00000029561	10570.3	1212.42	3.1242	3.506e-133	2.0757e-129	9272	8637	10369	10436	1135	1252	1461	1528	Oasl2	2'-5' oligoadenylate synthetase-like 2 [Source:MGI Symbol;Acc:MGI:1344390]
ENSMUSG00000028037	4172.43	347.86	3.585	6.628e-124	3.27e-120	3775	4178	3938	3338	342	392	443	362	Ifi44	interferon-induced protein 44 [Source:MGI Symbol;Acc:MGI:2443016]
ENSMUSG00000054072	7880.07	464.44	4.0837	4.7284e-122	1.9996e-118	6437	7400	8418	6678	357	528	495	701	Iigp1	interferon inducible GTPase 1 [Source:MGI Symbol;Acc:MGI:1926259]
ENSMUSG00000082292	918.51	44.93	4.3627	9.8005e-112	3.6264e-108	746	781	1006	845	50	45	40	62	Gm12250	predicted gene 12250 [Source:MGI Symbol;Acc:MGI:3649299]
ENSMUSG00000029417	4892.17	48.68	6.6581	1.1895e-100	3.9125e-97	3830	5474	6219	2510	63	44	51	53	Cxcl9	chemokine (C-X-C motif) ligand 9 [Source:MGI Symbol;Acc:MGI:1352449]
ENSMUSG00000079363	4256.39	379.19	3.4898	4.5097e-98	1.335e-94	2778	4196	4554	4163	392	415	443	422	Gbp4	guanylate binding protein 4 [Source:MGI Symbol;Acc:MGI:97072]
ENSMUSG00000078921	1229.2	72.74	4.0746	1.9409e-92	5.223e-89	1047	1325	1073	1037	56	86	78	106	Tgtp2	T cell specific GTPase 2 [Source:MGI Symbol;Acc:MGI:3710083]
ENSMUSG00000035373	5459.54	127.88	5.4199	7.2136e-87	1.7795e-83	5691	4001	4134	5991	170	108	149	126	Ccl7	chemokine (C-C motif) ligand 7 [Source:MGI Symbol;Acc:MGI:99512]
ENSMUSG00000006930	715.39	46.19	3.9424	2.1362e-75	4.8644e-72	671	651	674	615	30	75	56	48	Hap1	huntingtin-associated protein 1 [Source:MGI Symbol;Acc:MGI:1261831]
ENSMUSG00000017830	2413.27	328.12	2.8798	6.4771e-75	1.3695e-71	2290	1940	2545	2063	336	365	422	325	Dhx58	DEXH (Asp-Glu-X-His) box polypeptide 58 [Source:MGI Symbol;Acc:MGI:1931560]
ENSMUSG00000027514	3966.6	348.36	3.5112	1.4637e-74	2.8887e-71	3319	3959	3778	3452	410	319	354	438	Zbp1	Z-DNA binding protein 1 [Source:MGI Symbol;Acc:MGI:1927449]
ENSMUSG00000078920	4026.98	355.42	3.5023	4.3631e-72	8.0722e-69	3732	3782	3912	3282	334	358	338	545	Ifi47	interferon gamma inducible protein 47 [Source:MGI Symbol;Acc:MGI:99448]
ENSMUSG00000035692	14218.3	539.56	4.7211	1.8002e-71	3.1348e-68	12286	13161	14505	12134	769	400	585	564	Isg15	ISG15 ubiquitin-like modifier [Source:MGI Symbol;Acc:MGI:1855694]
ENSMUSG00000105504	8796.68	190.27	5.5321	1.7941e-70	2.9504e-67	6854	3993	10900	10869	222	209	166	235	Gbp5	guanylate binding protein 5 [Source:MGI Symbol;Acc:MGI:2429943]
ENSMUSG00000078922	1193.15	59.02	4.3331	7.4245e-70	1.1567e-66	1026	1405	992	918	43	62	69	91	Tgtp1	T cell specific GTPase 1 [Source:MGI Symbol;Acc:MGI:98734]
ENSMUSG00000054203	7702.59	689.68	3.4811	8.0788e-70	1.1957e-66	7384	5635	8880	6388	577	709	761	1029	Ifi205	interferon activated gene 205 [Source:MGI Symbol;Acc:MGI:101847]
ENSMUSG00000059089	710.84	85.18	3.0618	1.4683e-68	2.0697e-65	631	530	841	615	80	103	100	95	Fcgr4	Fc receptor, IgG, low affinity IV [Source:MGI Symbol;Acc:MGI:2179523]
ENSMUSG00000022906	4923.88	823.84	2.5794	1.953e-67	2.6279e-64	4713	3775	5296	4260	759	895	925	1078	Parp9	poly (ADP-ribose) polymerase family, member 9 [Source:MGI Symbol;Acc:MGI:1933117]
ENSMUSG00000040026	35246	699.43	5.6557	4.9558e-67	6.3784e-64	27281	50768	24877	24891	938	655	587	843	Saa3	serum amyloid A 3 [Source:MGI Symbol;Acc:MGI:98223]
ENSMUSG00000029298	4903.14	508.21	3.2704	1.1359e-66	1.4011e-63	4158	3085	6018	4849	481	609	585	579	Gbp9	guanylate-binding protein 9 [Source:MGI Symbol;Acc:MGI:3605620]
ENSMUSG00000068606	318.68	8.74	5.1552	2.9818e-66	3.5307e-63	242	321	316	290	4	13	15	8	Gm4841	predicted gene 4841 [Source:MGI Symbol;Acc:MGI:3643814]
ENSMUSG00000091649	1197.73	120.61	3.3167	3.6329e-64	4.1362e-61	1160	991	1251	980	142	130	110	145	Phf11b	PHD finger protein 11B [Source:MGI Symbol;Acc:MGI:3645789]
ENSMUSG00000040483	3416.02	692.23	2.3034	3.2148e-62	3.5246e-59	3142	2812	3246	3287	679	722	767	893	Xaf1	XIAP associated factor 1 [Source:MGI Symbol;Acc:MGI:3772572]
ENSMUSG00000033538	4184.14	521.9	3.0044	7.7799e-61	8.2251e-58	4111	3377	4229	3576	617	599	543	522	Casp4	caspase 4, apoptosis-related cysteine peptidase [Source:MGI Symbol;Acc:MGI:107700]
ENSMUSG00000046879	8109.1	1346.3	2.5902	1.3825e-60	1.4112e-57	6242	7240	8807	7549	1058	1457	1575	1935	Irgm1	immunity-related GTPase family M member 1 [Source:MGI Symbol;Acc:MGI:107567]
ENSMUSG00000037849	669.02	45.27	3.8856	2.3058e-60	2.2752e-57	707	486	754	502	42	56	42	61	Ifi206	interferon activated gene 206 [Source:MGI Symbol;Acc:MGI:3646410]
ENSMUSG00000068245	4074.69	482.7	3.0783	9.0648e-60	8.656e-57	4079	3048	4255	3524	513	521	453	637	Phf11d	PHD finger protein 11D [Source:MGI Symbol;Acc:MGI:1277133]
ENSMUSG00000073489	5410.4	635.09	3.0904	2.2671e-59	2.0972e-56	5932	4667	5251	3834	551	710	768	800	Ifi204	interferon activated gene 204 [Source:MGI Symbol;Acc:MGI:96429]
ENSMUSG00000073491	957.92	98.91	3.2822	2.7444e-59	2.4618e-56	852	773	921	960	122	119	87	103	Ifi213	interferon activated gene 213 [Source:MGI Symbol;Acc:MGI:3695276]
ENSMUSG00000029798	1859.05	211.54	3.1373	1.976e-58	1.7204e-55	1607	1370	2025	1832	222	204	207	298	Herc6	hect domain and RLD 6 [Source:MGI Symbol;Acc:MGI:1914388]
ENSMUSG00000074896	11225.6	594.43	4.2393	7.5288e-57	6.3676e-54	12149	12025	8562	7834	574	557	567	931	Ifit3	interferon-induced protein with tetratricopeptide repeats 3 [Source:MGI Symbol;Acc:MGI:1101055]
ENSMUSG00000038507	5847.01	1021.07	2.5175	1.1049e-56	9.0855e-54	5217	3968	6459	5854	900	1253	1171	1223	Parp12	poly (ADP-ribose) polymerase family, member 12 [Source:MGI Symbol;Acc:MGI:2143990]
ENSMUSG00000052270	303.78	9.17	5.0441	1.4018e-56	1.1215e-53	263	253	370	233	8	17	10	6	Fpr2	formyl peptide receptor 2 [Source:MGI Symbol;Acc:MGI:1278319]
ENSMUSG00000040328	1075.41	58.43	4.2004	2.3274e-56	1.8131e-53	1035	556	1306	1066	48	66	71	76	Olfr56	olfactory receptor 56 [Source:MGI Symbol;Acc:MGI:1333785]
ENSMUSG00000012428	10808	461.87	4.5494	1.0147e-55	7.7022e-53	11942	8253	12627	6714	595	366	567	474	Steap4	STEAP family member 4 [Source:MGI Symbol;Acc:MGI:1923560]
ENSMUSG00000070034	1869.92	278.6	2.746	1.929e-55	1.4276e-52	1937	1758	1698	1406	244	332	352	313	Sp110	Sp110 nuclear body protein [Source:MGI Symbol;Acc:MGI:1923364]
ENSMUSG00000047945	3586.36	675.87	2.4086	1.9937e-55	1.4395e-52	3017	3081	4194	2909	711	713	732	820	Marcksl1	MARCKS-like 1 [Source:MGI Symbol;Acc:MGI:97143]
ENSMUSG00000017309	34.07	544.7	-4.0083	2.2167e-54	1.5623e-51	40	36	28	19	454	618	757	603	Cd300lg	CD300 molecule like family member G [Source:MGI Symbol;Acc:MGI:1289168]
ENSMUSG00000022126	4952.04	18.99	8.0443	1.2861e-53	8.8539e-51	7462	1749	4418	4243	37	20	9	13	Acod1	aconitate decarboxylase 1 [Source:MGI Symbol;Acc:MGI:103206]
ENSMUSG00000066677	440.48	38.07	3.5292	1.8358e-53	1.2351e-50	436	304	509	368	32	49	39	50	Ifi208	interferon activated gene 208 [Source:MGI Symbol;Acc:MGI:2442822]
ENSMUSG00000030921	4552.45	568.23	3.0024	3.88e-53	2.5523e-50	4016	2836	5330	4596	555	625	608	726	Trim30a	tripartite motif-containing 30A [Source:MGI Symbol;Acc:MGI:98178]
ENSMUSG00000020676	1322.19	40.44	5.0352	5.1007e-53	3.2824e-50	1752	1258	913	821	46	36	43	52	Ccl11	chemokine (C-C motif) ligand 11 [Source:MGI Symbol;Acc:MGI:103576]
ENSMUSG00000057596	2005.94	230.22	3.123	3.5499e-52	2.2359e-49	1753	1202	2288	2148	204	287	256	278	Trim30d	tripartite motif-containing 30D [Source:MGI Symbol;Acc:MGI:3035181]
ENSMUSG00000011008	840.81	38.28	4.4689	3.7214e-52	2.295e-49	844	678	903	651	52	22	47	44	Mcoln2	mucolipin 2 [Source:MGI Symbol;Acc:MGI:1915529]
ENSMUSG00000026222	4223.36	884.79	2.2557	6.7208e-52	4.0602e-49	3854	3213	4571	3861	926	919	998	1054	Sp100	nuclear antigen Sp100 [Source:MGI Symbol;Acc:MGI:109561]
ENSMUSG00000037321	6320.76	1115.76	2.5026	3.7683e-51	2.231e-48	5550	4717	6875	6082	1213	1123	1183	1382	Tap1	transporter 1, ATP-binding cassette, sub-family B (MDR/TAP) [Source:MGI Symbol;Acc:MGI:98483]
ENSMUSG00000026536	2657.46	241.35	3.4622	6.9149e-51	4.0136e-48	2911	1937	2736	2111	266	244	218	331	Ifi211	interferon activated gene 211 [Source:MGI Symbol;Acc:MGI:3041120]
ENSMUSG00000028268	13728.1	1042.27	3.7201	7.6039e-51	4.3287e-48	12271	11388	14257	12403	1462	858	1130	1036	Gbp3	guanylate binding protein 3 [Source:MGI Symbol;Acc:MGI:1926263]
ENSMUSG00000033355	3016.04	544.72	2.4695	4.212e-50	2.3525e-47	3117	2536	2914	2426	548	560	628	669	Rtp4	receptor transporter protein 4 [Source:MGI Symbol;Acc:MGI:1915025]
ENSMUSG00000000386	3863.89	157.03	4.6223	1.0257e-49	5.6229e-47	4012	1742	5317	3202	178	169	146	195	Mx1	MX dynamin-like GTPase 1 [Source:MGI Symbol;Acc:MGI:97243]
ENSMUSG00000034459	11809.5	653.03	4.177	4.4304e-49	2.3845e-46	10845	6242	14580	11920	713	615	562	976	Ifit1	interferon-induced protein with tetratricopeptide repeats 1 [Source:MGI Symbol;Acc:MGI:99450]
ENSMUSG00000078606	595.76	87.57	2.762	5.4737e-49	2.8934e-46	487	459	578	662	66	110	100	117	Gvin2	GTPase, very large interferon inducible, family member 2 [Source:MGI Symbol;Acc:MGI:3782245]
ENSMUSG00000040296	4731.46	879.9	2.4273	1.5552e-48	8.0765e-46	4243	3251	5402	4512	882	1016	924	1066	Ddx58	DEAD/H box helicase 58 [Source:MGI Symbol;Acc:MGI:2442858]
ENSMUSG00000045551	221.1	3.93	5.7759	2.3039e-48	1.1758e-45	183	195	236	198	2	10	2	4	Fpr1	formyl peptide receptor 1 [Source:MGI Symbol;Acc:MGI:107443]
ENSMUSG00000030107	4591.61	519.79	3.1432	8.0787e-48	4.0533e-45	4710	3185	4451	4419	494	475	559	773	Usp18	ubiquitin specific peptidase 18 [Source:MGI Symbol;Acc:MGI:1344364]
ENSMUSG00000066861	1539.08	205.23	2.9087	4.2239e-47	2.0839e-44	1563	1470	1174	1372	230	218	235	217	Oas1g	2'-5' oligoadenylate synthetase 1G [Source:MGI Symbol;Acc:MGI:97429]
ENSMUSG00000026981	4626.46	51.26	6.505	4.8056e-47	2.3321e-44	4889	2806	5842	3473	101	53	24	35	Il1rn	interleukin 1 receptor antagonist [Source:MGI Symbol;Acc:MGI:96547]
ENSMUSG00000005087	4542	564.36	3.0088	8.7222e-47	4.1644e-44	4096	2994	4397	5158	531	533	784	653	Cd44	CD44 antigen [Source:MGI Symbol;Acc:MGI:88338]
ENSMUSG00000025498	12418.8	1504.01	3.046	3.9697e-46	1.8652e-43	10713	13375	12329	8981	1778	1375	1607	1805	Irf7	interferon regulatory factor 7 [Source:MGI Symbol;Acc:MGI:1859212]
ENSMUSG00000040428	1147.62	193.43	2.5698	4.5155e-46	2.0885e-43	977	832	1311	1106	188	214	189	265	Plekha4	pleckstrin homology domain containing, family A (phosphoinositide binding specific) member 4 [Source:MGI Symbol;Acc:MGI:1916467]
ENSMUSG00000035929	8905.1	2348.63	1.9229	5.3063e-46	2.4166e-43	8021	7268	9745	7648	2180	2427	2804	3008	H2-Q4	histocompatibility 2, Q region locus 4 [Source:MGI Symbol;Acc:MGI:95933]
ENSMUSG00000027555	1415.84	247.74	2.516	1.9845e-45	8.9006e-43	1447	1101	1456	1169	257	272	250	313	Car13	carbonic anhydrase 13 [Source:MGI Symbol;Acc:MGI:1931322]
ENSMUSG00000006818	9737.37	1355.32	2.845	2.4408e-44	1.0784e-41	11418	7395	8712	7800	1353	1551	1657	1430	Sod2	superoxide dismutase 2, mitochondrial [Source:MGI Symbol;Acc:MGI:98352]
ENSMUSG00000032661	1450.15	133.69	3.4433	6.1612e-44	2.6821e-41	1107	1012	1701	1538	168	133	111	169	Oas3	2'-5' oligoadenylate synthetase 3 [Source:MGI Symbol;Acc:MGI:2180850]
ENSMUSG00000019890	1205.59	115.07	3.3872	1.8599e-43	7.9793e-41	1291	1240	789	1029	91	129	154	141	Nts	neurotensin [Source:MGI Symbol;Acc:MGI:1328351]
ENSMUSG00000062488	1826.47	85.93	4.4108	2.2946e-43	9.7035e-41	2059	2110	1194	1207	87	84	72	136	Ifit3b	interferon-induced protein with tetratricopeptide repeats 3B [Source:MGI Symbol;Acc:MGI:3698419]
ENSMUSG00000060519	5451.42	830.3	2.7153	3.8415e-43	1.6016e-40	5676	3646	5575	5029	880	923	819	1033	Tor3a	torsin family 3, member A [Source:MGI Symbol;Acc:MGI:1353652]
ENSMUSG00000039997	5900.99	686.15	3.1045	4.8824e-42	2.0073e-39	5690	3766	6740	5486	656	806	580	998	Ifi203	interferon activated gene 203 [Source:MGI Symbol;Acc:MGI:96428]
ENSMUSG00000034855	12303.7	128.69	6.5829	6.243e-42	2.5316e-39	13768	8111	10356	12454	275	94	55	104	Cxcl10	chemokine (C-X-C motif) ligand 10 [Source:MGI Symbol;Acc:MGI:1352450]
ENSMUSG00000000204	3579.34	101.38	5.1481	8.2211e-42	3.2886e-39	2978	2725	3583	3853	191	75	84	73	Slfn4	schlafen 4 [Source:MGI Symbol;Acc:MGI:1329010]
ENSMUSG00000026580	1050.24	128.21	3.0378	1.2261e-41	4.8395e-39	805	760	1439	893	148	133	139	141	Selp	selectin, platelet [Source:MGI Symbol;Acc:MGI:98280]
ENSMUSG00000043263	1188.59	119.02	3.3221	3.8136e-41	1.4854e-38	1271	736	1362	987	130	140	103	150	Ifi209	interferon activated gene 209 [Source:MGI Symbol;Acc:MGI:2138243]
ENSMUSG00000001123	10482.7	2153.21	2.2837	1.967e-40	7.5619e-38	10121	9951	10443	7750	2347	2257	2371	2484	Lgals9	lectin, galactose binding, soluble 9 [Source:MGI Symbol;Acc:MGI:109496]
ENSMUSG00000035385	15804.4	284.16	5.7993	7.7556e-40	2.9433e-37	13327	8141	14377	22168	544	198	227	214	Ccl2	chemokine (C-C motif) ligand 2 [Source:MGI Symbol;Acc:MGI:98259]
ENSMUSG00000012519	2217.74	339.03	2.7116	8.8057e-40	3.2996e-37	2222	1704	2234	1944	417	334	339	386	Mlkl	mixed lineage kinase domain-like [Source:MGI Symbol;Acc:MGI:1921818]
ENSMUSG00000063268	2585.13	629.75	2.0376	1.027e-39	3.8003e-37	2479	1818	2631	2538	596	710	739	747	Parp10	poly (ADP-ribose) polymerase family, member 10 [Source:MGI Symbol;Acc:MGI:3712326]
ENSMUSG00000037921	1742.05	302.17	2.528	2.1371e-39	7.8103e-37	1406	1132	2206	1702	293	351	346	348	Ddx60	DExD/H box helicase 60 [Source:MGI Symbol;Acc:MGI:2384570]
ENSMUSG00000026896	3678.92	598.87	2.6195	2.6778e-39	9.6667e-37	3449	2279	4413	3407	617	653	662	709	Ifih1	interferon induced with helicase C domain 1 [Source:MGI Symbol;Acc:MGI:1918836]
ENSMUSG00000052776	4198.7	675.82	2.636	4.2266e-38	1.5074e-35	4138	4113	3715	3307	788	682	840	645	Oas1a	2'-5' oligoadenylate synthetase 1A [Source:MGI Symbol;Acc:MGI:2180860]
ENSMUSG00000003283	774.89	131.8	2.5609	3.263e-37	1.1499e-34	714	633	845	650	162	139	122	151	Hck	hemopoietic cell kinase [Source:MGI Symbol;Acc:MGI:96052]
ENSMUSG00000030737	126.62	599.71	-2.2459	3.4225e-37	1.1919e-34	116	131	121	94	505	702	671	798	Slco2b1	solute carrier organic anion transporter family, member 2b1 [Source:MGI Symbol;Acc:MGI:1351872]
ENSMUSG00000036067	1695.81	43.28	5.2986	5.2376e-37	1.8028e-34	890	752	2388	2326	62	37	55	32	Slc2a6	solute carrier family 2 (facilitated glucose transporter), member 6 [Source:MGI Symbol;Acc:MGI:2443286]
ENSMUSG00000024013	46.93	243.45	-2.3735	4.0485e-36	1.3775e-33	39	41	46	46	250	275	262	287	Fgd2	FYVE, RhoGEF and PH domain containing 2 [Source:MGI Symbol;Acc:MGI:1347084]
ENSMUSG00000040253	3264.05	623.93	2.3872	6.5163e-36	2.192e-33	2545	2205	3756	3545	556	746	635	839	Gbp7	guanylate binding protein 7 [Source:MGI Symbol;Acc:MGI:2444421]
ENSMUSG00000000982	421.35	20.99	4.3555	2.0533e-35	6.8295e-33	405	420	391	319	38	17	15	18	Ccl3	chemokine (C-C motif) ligand 3 [Source:MGI Symbol;Acc:MGI:98260]
ENSMUSG00000024737	2126.25	118.41	4.1716	3.9827e-35	1.31e-32	2113	1432	2619	1656	195	104	111	92	Slc15a3	solute carrier family 15, member 3 [Source:MGI Symbol;Acc:MGI:1929691]
ENSMUSG00000074115	679.73	2.48	8.1889	4.8555e-35	1.5795e-32	489	1208	475	288	6	2	1	1	Saa1	serum amyloid A 1 [Source:MGI Symbol;Acc:MGI:98221]
ENSMUSG00000054855	3804.89	162.26	4.553	7.0148e-35	2.2571e-32	3762	2253	3359	4518	209	191	232	73	Rnd1	Rho family GTPase 1 [Source:MGI Symbol;Acc:MGI:2444878]
ENSMUSG00000041797	72.27	477.66	-2.7298	8.8283e-35	2.8101e-32	78	60	57	67	365	649	640	490	Abca9	ATP-binding cassette, sub-family A (ABC1), member 9 [Source:MGI Symbol;Acc:MGI:2386796]
ENSMUSG00000042726	5391.38	1551.65	1.797	1.2015e-34	3.7836e-32	4473	3879	6079	5428	1458	1768	1914	1743	Trafd1	TRAF type zinc finger domain containing 1 [Source:MGI Symbol;Acc:MGI:1923551]
ENSMUSG00000053175	2080.5	179.6	3.5378	5.7331e-34	1.7864e-31	1700	1466	2124	2358	273	180	155	160	Bcl3	B cell leukemia/lymphoma 3 [Source:MGI Symbol;Acc:MGI:88140]
ENSMUSG00000068246	1241.49	183.07	2.7639	7.8143e-34	2.4096e-31	1263	1262	1094	891	213	167	196	224	Apol9b	apolipoprotein L 9b [Source:MGI Symbol;Acc:MGI:1919148]
ENSMUSG00000106734	1898.08	440.91	2.1062	1.4021e-33	4.2787e-31	1822	1637	1665	1792	426	450	452	623	Gm20559	predicted gene, 20559 [Source:MGI Symbol;Acc:MGI:5295666]
ENSMUSG00000072620	6181.66	929.74	2.7336	1.5958e-33	4.8203e-31	6201	4258	6725	5465	1090	983	793	1197	Slfn2	schlafen 2 [Source:MGI Symbol;Acc:MGI:1313258]
ENSMUSG00000039699	887.96	34.47	4.6818	1.9363e-33	5.7898e-31	1339	590	543	701	22	55	29	50	Batf2	basic leucine zipper transcription factor, ATF-like 2 [Source:MGI Symbol;Acc:MGI:1921731]
ENSMUSG00000037944	339.17	22.97	3.9103	6.109e-33	1.8084e-30	268	262	417	306	39	17	19	22	Ccr7	chemokine (C-C motif) receptor 7 [Source:MGI Symbol;Acc:MGI:103011]
ENSMUSG00000020638	3342.15	146.88	4.5091	8.1539e-33	2.3898e-30	3358	1056	4539	3415	168	156	124	195	Cmpk2	cytidine monophosphate (UMP-CMP) kinase 2, mitochondrial [Source:MGI Symbol;Acc:MGI:99830]
ENSMUSG00000053846	1770.88	236.5	2.9041	9.2716e-33	2.6908e-30	2049	1192	2051	1181	202	297	260	296	Lipg	lipase, endothelial [Source:MGI Symbol;Acc:MGI:1341803]
ENSMUSG00000023341	1378.02	127.9	3.4313	1.2767e-32	3.6692e-30	1176	727	1505	1670	141	122	113	185	Mx2	MX dynamin-like GTPase 2 [Source:MGI Symbol;Acc:MGI:97244]
ENSMUSG00000032596	5048.48	1178.65	2.0991	2.5896e-32	7.3709e-30	3935	3487	5930	5295	1204	1414	1372	1214	Uba7	ubiquitin-like modifier activating enzyme 7 [Source:MGI Symbol;Acc:MGI:1349462]
ENSMUSG00000073555	680.95	64.43	3.3958	2.8919e-32	8.1529e-30	565	517	811	618	34	83	60	116	Gm4951	predicted gene 4951 [Source:MGI Symbol;Acc:MGI:3644953]
ENSMUSG00000090222	687.13	74.81	3.1973	4.4579e-32	1.2449e-29	659	351	724	789	60	104	79	92	Ifi203-ps	interferon activated gene 203, pseudogene [Source:MGI Symbol;Acc:MGI:3840117]
ENSMUSG00000022146	5073.68	1552.36	1.7083	5.1638e-32	1.4286e-29	4021	3957	5820	4907	1224	1909	1890	1929	Osmr	oncostatin M receptor [Source:MGI Symbol;Acc:MGI:1330819]
ENSMUSG00000035208	1725.91	185.03	3.222	5.7636e-32	1.5797e-29	1472	933	2194	1787	180	220	150	269	Slfn8	schlafen 8 [Source:MGI Symbol;Acc:MGI:2672859]
ENSMUSG00000043017	432.89	84.09	2.3611	8.4941e-32	2.3068e-29	349	338	539	373	64	97	96	120	Ptgir	prostaglandin I receptor (IP) [Source:MGI Symbol;Acc:MGI:99535]
ENSMUSG00000041827	4639.69	270.19	4.1038	9.4443e-32	2.5415e-29	4340	2178	6140	4504	414	246	265	229	Oasl1	2'-5' oligoadenylate synthetase-like 1 [Source:MGI Symbol;Acc:MGI:2180849]
ENSMUSG00000024675	795.42	47.29	4.0852	1.1896e-31	3.1725e-29	651	554	984	750	83	37	39	40	Ms4a4c	membrane-spanning 4-domains, subfamily A, member 4C [Source:MGI Symbol;Acc:MGI:1927656]
ENSMUSG00000024778	756.02	130.45	2.5333	1.5085e-31	3.987e-29	810	766	603	558	110	148	157	167	Fas	Fas (TNF receptor superfamily member 6) [Source:MGI Symbol;Acc:MGI:95484]
ENSMUSG00000040033	6602.83	1389.62	2.2485	2.8515e-31	7.4698e-29	4910	4529	7192	7733	1306	1586	1452	1819	Stat2	signal transducer and activator of transcription 2 [Source:MGI Symbol;Acc:MGI:103039]
ENSMUSG00000070031	786.47	158.06	2.3175	9.269e-31	2.3961e-28	784	539	854	705	173	156	192	173	Sp140	Sp140 nuclear body protein [Source:MGI Symbol;Acc:MGI:3702467]
ENSMUSG00000023903	178.16	13.58	3.7057	9.3085e-31	2.3961e-28	175	107	232	143	10	17	17	17	Mmp25	matrix metallopeptidase 25 [Source:MGI Symbol;Acc:MGI:2443938]
ENSMUSG00000079339	442.18	23.48	4.2525	1.2115e-30	3.0916e-28	439	321	620	252	37	22	17	24	Ifit1bl1	interferon induced protein with tetratricpeptide repeats 1B like 1 [Source:MGI Symbol;Acc:MGI:3650685]
ENSMUSG00000015947	1571.89	255.84	2.621	1.5611e-30	3.9498e-28	1721	1196	1666	1154	307	297	256	257	Fcgr1	Fc receptor, IgG, high affinity I [Source:MGI Symbol;Acc:MGI:95498]
ENSMUSG00000038305	592.54	181.95	1.7017	1.6289e-30	4.0863e-28	507	568	530	559	158	221	240	192	Spats2l	spermatogenesis associated, serine-rich 2-like [Source:MGI Symbol;Acc:MGI:1914448]
ENSMUSG00000034422	9091.3	1293.52	2.8132	2.5926e-30	6.4492e-28	8207	4838	10399	10052	1149	1601	1231	1776	Parp14	poly (ADP-ribose) polymerase family, member 14 [Source:MGI Symbol;Acc:MGI:1919489]
ENSMUSG00000015316	197.43	4.52	5.5026	4.2412e-30	1.0462e-27	135	103	240	255	8	4	2	5	Slamf1	signaling lymphocytic activation molecule family member 1 [Source:MGI Symbol;Acc:MGI:1351314]
ENSMUSG00000052749	153.94	17.91	3.097	5.1593e-30	1.2622e-27	164	136	133	126	15	24	17	24	Trim30b	tripartite motif-containing 30B [Source:MGI Symbol;Acc:MGI:4821256]
ENSMUSG00000028633	4349.39	1280.39	1.7641	6.2208e-30	1.5094e-27	4383	4105	3719	3599	1167	1570	1566	1389	Ctps	cytidine 5'-triphosphate synthase [Source:MGI Symbol;Acc:MGI:1858304]
ENSMUSG00000027078	3253.25	749.18	2.1193	1.1962e-29	2.879e-27	3027	3127	3296	2440	856	720	812	891	Ube2l6	ubiquitin-conjugating enzyme E2L 6 [Source:MGI Symbol;Acc:MGI:1914500]
ENSMUSG00000090272	4160.66	656.79	2.6639	1.3482e-29	3.2185e-27	4154	2508	4952	3682	751	668	636	820	Mndal	myeloid nuclear differentiation antigen like [Source:MGI Symbol;Acc:MGI:3780953]
ENSMUSG00000020641	10823.5	411	4.7195	4.49e-29	1.0633e-26	10223	3010	16081	10939	561	400	319	494	Rsad2	radical S-adenosyl methionine domain containing 2 [Source:MGI Symbol;Acc:MGI:1929628]
ENSMUSG00000018459	670.07	63.49	3.3994	4.8607e-29	1.142e-26	787	611	703	335	57	58	78	89	Slc13a3	solute carrier family 13 (sodium-dependent dicarboxylate transporter), member 3 [Source:MGI Symbol;Acc:MGI:2149635]
ENSMUSG00000075707	32.27	680.26	-4.399	1.1336e-28	2.6422e-26	24	49	34	11	362	978	959	798	Dio3	deiodinase, iodothyronine type III [Source:MGI Symbol;Acc:MGI:1306782]
ENSMUSG00000051906	30.09	217.85	-2.8641	1.4814e-28	3.426e-26	38	18	26	27	193	228	275	273	Cd209f	CD209f antigen [Source:MGI Symbol;Acc:MGI:1916392]
ENSMUSG00000000318	49.86	547.48	-3.4601	1.6848e-28	3.8662e-26	70	25	54	32	538	559	731	593	Clec10a	C-type lectin domain family 10, member A [Source:MGI Symbol;Acc:MGI:96975]
ENSMUSG00000044703	258.03	26.28	3.2988	2.2228e-28	5.0615e-26	302	150	291	200	27	33	29	27	Phf11a	PHD finger protein 11A [Source:MGI Symbol;Acc:MGI:1918441]
ENSMUSG00000036995	475.96	117.88	2.0125	6.0823e-28	1.3744e-25	334	396	487	536	99	133	139	155	Asap3	ArfGAP with SH3 domain, ankyrin repeat and PH domain 3 [Source:MGI Symbol;Acc:MGI:2684986]
ENSMUSG00000020057	940.75	384.9	1.2895	8.2697e-28	1.8545e-25	818	852	1001	779	357	457	460	435	Dram1	DNA-damage regulated autophagy modulator 1 [Source:MGI Symbol;Acc:MGI:1918962]
ENSMUSG00000032508	1952.07	626.04	1.6413	1.5342e-27	3.4147e-25	1951	1649	1940	1586	646	703	683	729	Myd88	myeloid differentiation primary response gene 88 [Source:MGI Symbol;Acc:MGI:108005]
ENSMUSG00000025044	964.08	184.54	2.3882	2.0214e-27	4.4655e-25	946	792	1098	698	223	197	214	171	Msr1	macrophage scavenger receptor 1 [Source:MGI Symbol;Acc:MGI:98257]
ENSMUSG00000057346	1898.69	357.26	2.4108	2.1578e-27	4.7315e-25	1775	1612	1840	1712	378	273	397	522	Apol9a	apolipoprotein L 9a [Source:MGI Symbol;Acc:MGI:3606001]
ENSMUSG00000049988	670.66	148.89	2.174	3.7423e-27	8.1455e-25	683	613	663	486	168	175	164	146	Lrrc25	leucine rich repeat containing 25 [Source:MGI Symbol;Acc:MGI:2445284]
ENSMUSG00000026946	2217.23	393.16	2.496	4.0016e-27	8.6464e-25	2226	2545	1803	1460	408	419	478	428	Nmi	N-myc (and STAT) interactor [Source:MGI Symbol;Acc:MGI:1928368]
ENSMUSG00000016496	1998.08	134.8	3.8911	4.1655e-27	8.9353e-25	1282	830	2782	2571	154	137	113	186	Cd274	CD274 antigen [Source:MGI Symbol;Acc:MGI:1926446]
ENSMUSG00000020407	1374.96	230.83	2.5771	4.7265e-27	1.0066e-24	1231	1403	1184	1191	299	187	241	273	Upp1	uridine phosphorylase 1 [Source:MGI Symbol;Acc:MGI:1097668]
ENSMUSG00000022489	400.44	131.69	1.6064	4.9577e-27	1.0483e-24	313	395	416	346	129	164	145	145	Pde1b	phosphodiesterase 1B, Ca2+-calmodulin dependent [Source:MGI Symbol;Acc:MGI:97523]
ENSMUSG00000070327	18710.5	2457.36	2.9287	5.9907e-27	1.2577e-24	13686	9162	24700	22022	2459	2986	2774	2645	Rnf213	ring finger protein 213 [Source:MGI Symbol;Acc:MGI:1289196]
ENSMUSG00000016529	116.06	9.64	3.6074	6.3082e-27	1.315e-24	122	88	122	92	12	12	12	6	Il10	interleukin 10 [Source:MGI Symbol;Acc:MGI:96537]
ENSMUSG00000076617	78.38	478.19	-2.604	6.4668e-27	1.3387e-24	46	68	98	79	556	448	502	584	Ighm	immunoglobulin heavy constant mu [Source:MGI Symbol;Acc:MGI:96448]
ENSMUSG00000026104	2508.41	754.29	1.7339	1.1667e-26	2.3984e-24	2181	2717	2138	2101	762	847	830	892	Stat1	signal transducer and activator of transcription 1 [Source:MGI Symbol;Acc:MGI:103063]
ENSMUSG00000025161	2497.26	407.21	2.6181	3.8258e-26	7.8104e-24	2027	1895	2602	2657	535	335	383	509	Slc16a3	solute carrier family 16 (monocarboxylic acid transporters), member 3 [Source:MGI Symbol;Acc:MGI:1933438]
ENSMUSG00000038213	1465.56	388.53	1.9176	4.7366e-26	9.6037e-24	1299	1205	1518	1351	473	387	406	427	Tapbpl	TAP binding protein-like [Source:MGI Symbol;Acc:MGI:2384853]
ENSMUSG00000001131	7136.91	942.85	2.9207	7.2263e-26	1.4552e-23	7750	7217	6182	4721	1219	823	852	1192	Timp1	tissue inhibitor of metalloproteinase 1 [Source:MGI Symbol;Acc:MGI:98752]
ENSMUSG00000006418	3800.83	1472.05	1.369	1.0575e-25	2.1151e-23	3117	3200	3996	3649	1533	1561	1581	1811	Rnf114	ring finger protein 114 [Source:MGI Symbol;Acc:MGI:1933159]
ENSMUSG00000018899	4410.1	628.93	2.8098	1.1185e-25	2.2222e-23	2143	3637	5048	5557	535	796	619	856	Irf1	interferon regulatory factor 1 [Source:MGI Symbol;Acc:MGI:96590]
ENSMUSG00000041347	248.59	9.42	4.7338	1.1329e-25	2.2357e-23	260	271	211	159	12	11	17	1	Bdkrb1	bradykinin receptor, beta 1 [Source:MGI Symbol;Acc:MGI:88144]
ENSMUSG00000029605	695.09	134.3	2.3688	1.2653e-25	2.4805e-23	689	521	571	749	97	179	136	192	Oas1b	2'-5' oligoadenylate synthetase 1B [Source:MGI Symbol;Acc:MGI:97430]
ENSMUSG00000079014	193.45	12.59	3.9771	2.0741e-25	4.0393e-23	138	164	277	140	22	9	10	12	Serpina3i	serine (or cysteine) peptidase inhibitor, clade A, member 3I [Source:MGI Symbol;Acc:MGI:2182841]
ENSMUSG00000042901	3502.57	1057.95	1.7269	2.1951e-25	4.2469e-23	3529	3284	3383	2567	938	1235	1171	1364	Aida	axin interactor, dorsalization associated [Source:MGI Symbol;Acc:MGI:1919737]
ENSMUSG00000024339	2626.92	746.34	1.8167	3.4137e-25	6.5618e-23	2145	2466	2618	2400	897	728	810	820	Tap2	transporter 2, ATP-binding cassette, sub-family B (MDR/TAP) [Source:MGI Symbol;Acc:MGI:98484]
ENSMUSG00000045868	424.14	78.09	2.4359	3.4652e-25	6.6179e-23	354	315	412	475	52	128	86	87	Gvin1	GTPase, very large interferon inducible 1 [Source:MGI Symbol;Acc:MGI:1921808]
ENSMUSG00000097804	233.22	9.94	4.5397	5.0679e-25	9.6167e-23	282	103	175	285	6	10	19	10	Gm16685	predicted gene, 16685 [Source:MGI Symbol;Acc:MGI:4439609]
ENSMUSG00000038352	264.26	85.19	1.6362	7.1153e-25	1.3416e-22	211	234	279	247	83	92	108	94	Arl5c	ADP-ribosylation factor-like 5C [Source:MGI Symbol;Acc:MGI:3028577]
ENSMUSG00000002325	2537.19	1035.14	1.2932	7.5245e-25	1.4097e-22	2386	2306	2383	2184	943	1173	1160	1323	Irf9	interferon regulatory factor 9 [Source:MGI Symbol;Acc:MGI:107587]
ENSMUSG00000047735	5463.13	1469.02	1.8949	1.1146e-24	2.075e-22	5382	3482	5801	5359	1373	1793	1536	1818	Samd9l	sterile alpha motif domain containing 9-like [Source:MGI Symbol;Acc:MGI:1343184]
ENSMUSG00000037138	25.43	238.8	-3.2273	1.1496e-24	2.127e-22	28	13	38	15	215	319	308	221	Aff3	AF4/FMR2 family, member 3 [Source:MGI Symbol;Acc:MGI:106927]
ENSMUSG00000046031	229.4	12.94	4.1634	2.2613e-24	4.1577e-22	191	91	321	250	17	10	16	13	Calhm6	calcium homeostasis modulator family member 6 [Source:MGI Symbol;Acc:MGI:2443082]
ENSMUSG00000026170	270.01	1075.11	-1.9934	2.2823e-24	4.1704e-22	259	194	315	224	872	1167	1214	1551	Cyp27a1	cytochrome P450, family 27, subfamily a, polypeptide 1 [Source:MGI Symbol;Acc:MGI:88594]
ENSMUSG00000038884	1480.43	582.26	1.3458	3.2224e-24	5.8522e-22	1283	1255	1371	1506	519	726	741	606	Shfl	shiftless antiviral inhibitor of ribosomal frameshifting [Source:MGI Symbol;Acc:MGI:2441788]
ENSMUSG00000031897	3577.22	649.26	2.4628	3.2771e-24	5.9152e-22	3510	3764	3148	2581	809	554	697	762	Psmb10	proteasome (prosome, macropain) subunit, beta type 10 [Source:MGI Symbol;Acc:MGI:1096380]
ENSMUSG00000025810	157.19	520.12	-1.726	3.341e-24	5.9939e-22	113	173	159	132	469	655	644	546	Nrp1	neuropilin 1 [Source:MGI Symbol;Acc:MGI:106206]
ENSMUSG00000092021	128.56	4.55	4.7843	5.6383e-24	1.0054e-21	67	155	119	132	1	3	7	10	Gbp11	guanylate binding protein 11 [Source:MGI Symbol;Acc:MGI:3646307]
ENSMUSG00000025597	112.48	536.38	-2.2559	1.0233e-23	1.8139e-21	101	129	106	74	388	721	671	633	Klhl4	kelch-like 4 [Source:MGI Symbol;Acc:MGI:2442829]
ENSMUSG00000102037	88.52	11.1	3.0229	2.2904e-23	4.0357e-21	71	83	93	78	15	12	11	10	Bcl2a1a	B cell leukemia/lymphoma 2 related protein A1a [Source:MGI Symbol;Acc:MGI:102687]
ENSMUSG00000028859	741.55	96.96	2.9423	2.7487e-23	4.8146e-21	629	590	789	716	153	95	73	92	Csf3r	colony stimulating factor 3 receptor (granulocyte) [Source:MGI Symbol;Acc:MGI:1339755]
ENSMUSG00000033545	3400.75	1086.1	1.6471	2.7895e-23	4.8573e-21	3271	2708	3113	3318	1146	1143	1105	1387	Znrf1	zinc and ring finger 1 [Source:MGI Symbol;Acc:MGI:2177308]
ENSMUSG00000017009	15741.2	3297.49	2.2553	2.9099e-23	5.0374e-21	12838	11034	15866	18114	3863	3101	4363	3082	Sdc4	syndecan 4 [Source:MGI Symbol;Acc:MGI:1349164]
ENSMUSG00000028088	40.63	196.75	-2.2681	3.0994e-23	5.3343e-21	27	28	53	43	166	236	223	253	Fmo5	flavin containing monooxygenase 5 [Source:MGI Symbol;Acc:MGI:1310004]
ENSMUSG00000038301	1283.66	265.76	2.2739	3.4269e-23	5.8638e-21	1320	814	1240	1315	316	261	289	294	Snx10	sorting nexin 10 [Source:MGI Symbol;Acc:MGI:1919232]
ENSMUSG00000032649	16.71	122.52	-2.8789	4.5251e-23	7.6544e-21	20	11	19	11	108	164	152	122	Colgalt2	collagen beta(1-O)galactosyltransferase 2 [Source:MGI Symbol;Acc:MGI:2138232]
ENSMUSG00000053338	151.8	12.41	3.6282	4.5137e-23	7.6544e-21	118	91	199	155	16	18	14	6	Tarm1	T cell-interacting, activating receptor on myeloid cells 1 [Source:MGI Symbol;Acc:MGI:2442280]
ENSMUSG00000020464	1700.41	559.72	1.6036	5.8345e-23	9.8132e-21	1636	1188	1752	1652	565	670	639	599	Pnpt1	polyribonucleotide nucleotidyltransferase 1 [Source:MGI Symbol;Acc:MGI:1918951]
ENSMUSG00000024401	362.24	19.48	4.2365	6.3603e-23	1.0637e-20	417	168	292	439	34	14	19	15	Tnf	tumor necrosis factor [Source:MGI Symbol;Acc:MGI:104798]
ENSMUSG00000044701	122.75	2.31	5.7621	7.3558e-23	1.2233e-20	90	60	169	138	3	1	5	1	Il27	interleukin 27 [Source:MGI Symbol;Acc:MGI:2384409]
ENSMUSG00000017652	1055.94	82.91	3.6752	1.0151e-22	1.6787e-20	1113	401	1226	1142	121	88	77	70	Cd40	CD40 antigen [Source:MGI Symbol;Acc:MGI:88336]
ENSMUSG00000019124	120.62	477.34	-1.9868	1.0549e-22	1.7286e-20	100	141	109	90	370	573	572	624	Scrn1	secernin 1 [Source:MGI Symbol;Acc:MGI:1917188]
ENSMUSG00000058818	1268.82	443.83	1.5136	1.0569e-22	1.7286e-20	1220	1056	1213	1144	332	571	532	558	Pirb	paired Ig-like receptor B [Source:MGI Symbol;Acc:MGI:894311]
ENSMUSG00000095407	90.76	863.73	-3.2478	1.2041e-22	1.9584e-20	82	40	142	74	1028	847	775	1119	Tmem200c	transmembrane protein 200C [Source:MGI Symbol;Acc:MGI:3646281]
ENSMUSG00000049401	3922.45	1312.22	1.5802	1.2176e-22	1.9697e-20	3744	3397	4033	3171	1439	1340	1576	1407	Ogfr	opioid growth factor receptor [Source:MGI Symbol;Acc:MGI:1919325]
ENSMUSG00000040283	31.66	224.31	-2.8295	1.2785e-22	2.0569e-20	28	42	27	18	206	257	210	323	Btnl9	butyrophilin-like 9 [Source:MGI Symbol;Acc:MGI:2442439]
ENSMUSG00000067235	189.1	24.67	2.9531	1.3591e-22	2.1746e-20	111	148	217	225	32	27	21	27	H2-Q10	histocompatibility 2, Q region locus 10 [Source:MGI Symbol;Acc:MGI:95929]
ENSMUSG00000003617	6344.51	1490.21	2.0899	1.3822e-22	2.1998e-20	7408	4948	6244	4464	1296	1926	1874	1548	Cp	ceruloplasmin [Source:MGI Symbol;Acc:MGI:88476]
ENSMUSG00000038332	279	1486.06	-2.413	1.5026e-22	2.3786e-20	245	242	351	190	989	1752	1609	2351	Sesn1	sestrin 1 [Source:MGI Symbol;Acc:MGI:2155278]
ENSMUSG00000063388	201.15	26.68	2.9125	1.5223e-22	2.397e-20	170	148	221	201	22	26	20	51	BC023105	cDNA sequence BC023105 [Source:MGI Symbol;Acc:MGI:2384767]
ENSMUSG00000075010	2620.48	438.59	2.5802	1.7848e-22	2.7954e-20	2263	1693	3306	2419	579	404	385	530	AW112010	expressed sequence AW112010 [Source:MGI Symbol;Acc:MGI:2147706]
ENSMUSG00000004098	3645.92	1317.02	1.4686	2.8866e-22	4.4973e-20	3018	3274	3154	3878	1077	1554	1768	1488	Col5a3	collagen, type V, alpha 3 [Source:MGI Symbol;Acc:MGI:1858212]
ENSMUSG00000027832	6833.5	345.56	4.3064	3.2736e-22	5.0735e-20	4332	1884	10088	9316	492	359	337	299	Ptx3	pentraxin related gene [Source:MGI Symbol;Acc:MGI:104641]
ENSMUSG00000025746	807.7	14.17	5.8545	3.6964e-22	5.699e-20	1083	236	511	1082	31	13	5	9	Il6	interleukin 6 [Source:MGI Symbol;Acc:MGI:96559]
ENSMUSG00000023087	1181.65	253.05	2.2246	4.1113e-22	6.3058e-20	1007	792	1020	1506	278	263	274	296	Noct	nocturnin [Source:MGI Symbol;Acc:MGI:109382]
ENSMUSG00000030872	428.46	1206.09	-1.4925	4.2647e-22	6.5075e-20	316	363	458	441	1055	1323	1336	1655	Gga2	golgi associated, gamma adaptin ear containing, ARF binding protein 2 [Source:MGI Symbol;Acc:MGI:1921355]
ENSMUSG00000060183	227.96	0.64	8.401	8.3803e-22	1.2722e-19	255	166	233	177	0	0	0	3	Cxcl11	chemokine (C-X-C motif) ligand 11 [Source:MGI Symbol;Acc:MGI:1860203]
ENSMUSG00000046711	1246.27	214.45	2.5421	1.2614e-21	1.905e-19	1256	1007	1272	1018	310	197	225	189	Hmga1	high mobility group AT-hook 1 [Source:MGI Symbol;Acc:MGI:96160]
ENSMUSG00000078153	2055.94	525.12	1.9695	1.3936e-21	2.094e-19	2114	2064	1599	1672	561	504	630	614	Psme2b	protease (prosome, macropain) activator subunit 2B [Source:MGI Symbol;Acc:MGI:1341073]
ENSMUSG00000020310	118.41	2.95	5.3343	1.5434e-21	2.3074e-19	79	189	95	68	3	2	4	4	Madcam1	mucosal vascular addressin cell adhesion molecule 1 [Source:MGI Symbol;Acc:MGI:103579]
ENSMUSG00000025491	4098.21	552.41	2.8913	1.666e-21	2.4783e-19	3405	6033	2731	2651	547	575	748	572	Ifitm1	interferon induced transmembrane protein 1 [Source:MGI Symbol;Acc:MGI:1915963]
ENSMUSG00000036986	2408.46	711.35	1.7592	2.1142e-21	3.1293e-19	2200	1633	2565	2444	595	835	741	1004	Pml	promyelocytic leukemia [Source:MGI Symbol;Acc:MGI:104662]
ENSMUSG00000003206	145.61	24.14	2.6078	3.0115e-21	4.4352e-19	124	100	185	129	30	22	27	26	Ebi3	Epstein-Barr virus induced gene 3 [Source:MGI Symbol;Acc:MGI:1354171]
ENSMUSG00000022534	215.64	16.12	3.7676	3.2656e-21	4.7855e-19	201	158	220	211	28	16	19	5	Mefv	Mediterranean fever [Source:MGI Symbol;Acc:MGI:1859396]
ENSMUSG00000024679	1111.98	235.13	2.2433	5.9611e-21	8.6926e-19	1213	774	1277	806	277	273	245	233	Ms4a6d	membrane-spanning 4-domains, subfamily A, member 6D [Source:MGI Symbol;Acc:MGI:1916024]
ENSMUSG00000074151	3431.94	560.31	2.6151	6.5633e-21	9.5238e-19	2318	1828	4363	4251	587	612	541	728	Nlrc5	NLR family, CARD domain containing 5 [Source:MGI Symbol;Acc:MGI:3612191]
ENSMUSG00000039236	4576.43	966.21	2.2446	1.4466e-20	2.0889e-18	3780	4847	4298	3803	1322	985	1021	844	Isg20	interferon-stimulated protein [Source:MGI Symbol;Acc:MGI:1928895]
ENSMUSG00000040711	3567.61	1459.67	1.2892	1.5946e-20	2.2915e-18	2820	2725	3914	3681	1263	1825	1624	1795	Sh3pxd2b	SH3 and PX domains 2B [Source:MGI Symbol;Acc:MGI:2442062]
ENSMUSG00000035517	1935.23	771.58	1.3269	1.6146e-20	2.3089e-18	1754	1425	2096	1830	737	929	812	942	Tdrd7	tudor domain containing 7 [Source:MGI Symbol;Acc:MGI:2140279]
ENSMUSG00000003721	2396.9	1042.55	1.2013	1.8309e-20	2.6057e-18	1977	2128	2154	2509	1022	1204	1130	1257	Insig2	insulin induced gene 2 [Source:MGI Symbol;Acc:MGI:1920249]
ENSMUSG00000009585	2409.68	1131.72	1.0903	2.1773e-20	3.0838e-18	1910	2136	2413	2385	1036	1473	1183	1339	Apobec3	apolipoprotein B mRNA editing enzyme, catalytic polypeptide 3 [Source:MGI Symbol;Acc:MGI:1933111]
ENSMUSG00000075334	117.31	569.19	-2.2807	2.2137e-20	3.1205e-18	104	148	96	78	504	626	589	813	Rprm	reprimo, TP53 dependent G2 arrest mediator candidate [Source:MGI Symbol;Acc:MGI:1915124]
ENSMUSG00000032690	3699.54	756.28	2.2909	2.2457e-20	3.1506e-18	2745	2670	4170	4074	879	720	625	1081	Oas2	2'-5' oligoadenylate synthetase 2 [Source:MGI Symbol;Acc:MGI:2180852]
ENSMUSG00000010358	2537.67	591.26	2.1022	3.1224e-20	4.3599e-18	2482	2876	2018	1823	674	597	653	665	Ifi35	interferon-induced protein 35 [Source:MGI Symbol;Acc:MGI:1917360]
ENSMUSG00000105096	107.03	14.54	2.8654	3.777e-20	5.2491e-18	73	86	138	100	8	16	22	20	Gbp10	guanylate-binding protein 10 [Source:MGI Symbol;Acc:MGI:4359647]
ENSMUSG00000096727	1840.37	516.89	1.8334	3.9918e-20	5.5218e-18	1522	1836	1845	1538	622	464	538	629	Psmb9	proteasome (prosome, macropain) subunit, beta type 9 (large multifunctional peptidase 2) [Source:MGI Symbol;Acc:MGI:1346526]
ENSMUSG00000050896	314.2	18.92	4.0632	4.634e-20	6.3803e-18	230	124	573	256	25	23	12	22	Rtn4rl2	reticulon 4 receptor-like 2 [Source:MGI Symbol;Acc:MGI:2669796]
ENSMUSG00000028480	2984.46	695	2.1018	5.1904e-20	7.1132e-18	3038	3302	2423	2051	506	852	931	835	Glipr2	GLI pathogenesis-related 2 [Source:MGI Symbol;Acc:MGI:1917770]
ENSMUSG00000048852	93.34	15.66	2.5682	6.6009e-20	9.0046e-18	87	96	84	73	13	22	17	18	Gm12185	predicted gene 12185 [Source:MGI Symbol;Acc:MGI:3652173]
ENSMUSG00000063558	117.38	328.36	-1.4849	8.112e-20	1.1015e-17	97	96	121	117	264	442	382	382	Aox1	aldehyde oxidase 1 [Source:MGI Symbol;Acc:MGI:88035]
ENSMUSG00000044033	344.65	2251.68	-2.7068	9.1971e-20	1.2432e-17	223	245	575	249	1471	2874	3058	2766	Ccdc141	coiled-coil domain containing 141 [Source:MGI Symbol;Acc:MGI:1919735]
ENSMUSG00000071637	3717.47	997.05	1.899	1.1581e-19	1.5512e-17	3844	3178	3100	3383	1157	1072	894	1238	Cebpd	CCAAT/enhancer binding protein (C/EBP), delta [Source:MGI Symbol;Acc:MGI:103573]
ENSMUSG00000045932	15121.3	1322.95	3.5148	1.158e-19	1.5512e-17	9985	4915	24961	16993	1325	1383	1293	1841	Ifit2	interferon-induced protein with tetratricopeptide repeats 2 [Source:MGI Symbol;Acc:MGI:99449]
ENSMUSG00000039994	522.11	197.02	1.4067	1.2616e-19	1.6823e-17	484	489	519	416	193	239	199	241	Timeless	timeless circadian clock 1 [Source:MGI Symbol;Acc:MGI:1321393]
ENSMUSG00000008845	29.38	226.52	-2.9556	1.3633e-19	1.8097e-17	39	20	24	23	144	255	254	370	Cd163	CD163 antigen [Source:MGI Symbol;Acc:MGI:2135946]
ENSMUSG00000053897	18046.8	4616.17	1.9671	1.6667e-19	2.2025e-17	16256	14184	17784	17858	5764	4690	5737	3892	Slc39a8	solute carrier family 39 (metal ion transporter), member 8 [Source:MGI Symbol;Acc:MGI:1914797]
ENSMUSG00000026088	947.73	309.24	1.6161	1.7524e-19	2.3055e-17	950	813	827	859	304	316	322	425	Mitd1	MIT, microtubule interacting and transport, domain containing 1 [Source:MGI Symbol;Acc:MGI:1916278]
ENSMUSG00000030865	29.11	249.3	-3.1024	2.0046e-19	2.6257e-17	27	38	29	12	148	320	361	301	Chp2	calcineurin-like EF hand protein 2 [Source:MGI Symbol;Acc:MGI:1917511]
ENSMUSG00000026547	9428.37	3756.69	1.3276	2.2685e-19	2.9583e-17	9473	7881	9056	7979	3860	3994	4339	4375	Tagln2	transgelin 2 [Source:MGI Symbol;Acc:MGI:1312985]
ENSMUSG00000027217	124.11	477.73	-1.9474	3.242e-19	4.2092e-17	119	141	109	82	391	645	580	521	Tspan18	tetraspanin 18 [Source:MGI Symbol;Acc:MGI:1917186]
ENSMUSG00000040133	427.53	59.27	2.8513	3.6063e-19	4.6618e-17	521	435	382	207	59	70	55	78	Gpr176	G protein-coupled receptor 176 [Source:MGI Symbol;Acc:MGI:2685858]
ENSMUSG00000024308	9696.24	3436.63	1.4967	4.2372e-19	5.4534e-17	8587	8955	10421	7583	3895	3484	3698	3977	Tapbp	TAP binding protein [Source:MGI Symbol;Acc:MGI:1201689]
ENSMUSG00000079197	4676.86	1139.1	2.0381	4.4108e-19	5.6523e-17	4786	4619	3891	3676	1444	1120	1193	1191	Psme2	proteasome (prosome, macropain) activator subunit 2 (PA28 beta) [Source:MGI Symbol;Acc:MGI:1096365]
ENSMUSG00000025492	21218	4661.19	2.1865	5.5334e-19	7.0604e-17	20397	26472	16012	13907	4413	4822	5772	5649	Ifitm3	interferon induced transmembrane protein 3 [Source:MGI Symbol;Acc:MGI:1913391]
ENSMUSG00000040675	901.32	250.1	1.8507	5.6162e-19	7.1353e-17	1000	752	795	725	275	265	250	308	Mthfd1l	methylenetetrahydrofolate dehydrogenase (NADP+ dependent) 1-like [Source:MGI Symbol;Acc:MGI:1924836]
ENSMUSG00000025790	2808.54	627.03	2.1626	6.8738e-19	8.6956e-17	3361	2439	2479	1889	451	809	856	705	Slco3a1	solute carrier organic anion transporter family, member 3a1 [Source:MGI Symbol;Acc:MGI:1351867]
ENSMUSG00000024429	2128.64	1017.74	1.0651	9.2722e-19	1.168e-16	1929	1933	2041	1876	1043	1115	1165	1167	Gnl1	guanine nucleotide binding protein-like 1 [Source:MGI Symbol;Acc:MGI:95764]
ENSMUSG00000040855	51.31	197.58	-1.9466	9.7725e-19	1.2258e-16	34	60	46	48	161	269	222	232	Reps2	RALBP1 associated Eps domain containing protein 2 [Source:MGI Symbol;Acc:MGI:2663511]
ENSMUSG00000026749	1578.1	676.68	1.2222	1.133e-18	1.4152e-16	1438	1293	1717	1341	670	724	745	852	Nek6	NIMA (never in mitosis gene a)-related expressed kinase 6 [Source:MGI Symbol;Acc:MGI:1891638]
ENSMUSG00000027962	2203.74	148.69	3.8904	1.2937e-18	1.6091e-16	4028	1361	1262	1150	175	129	147	198	Vcam1	vascular cell adhesion molecule 1 [Source:MGI Symbol;Acc:MGI:98926]
ENSMUSG00000028527	846.45	146.79	2.5285	1.3321e-18	1.6499e-16	805	574	782	933	150	144	105	248	Ak4	adenylate kinase 4 [Source:MGI Symbol;Acc:MGI:87979]
ENSMUSG00000002983	1584.71	312.19	2.346	1.4382e-18	1.7739e-16	1496	1197	1554	1550	458	296	276	309	Relb	avian reticuloendotheliosis viral (v-rel) oncogene related B [Source:MGI Symbol;Acc:MGI:103289]
ENSMUSG00000023947	883.42	141.12	2.6508	1.7358e-18	2.1321e-16	642	619	1069	940	216	140	121	126	Nfkbie	nuclear factor of kappa light polypeptide gene enhancer in B cells inhibitor, epsilon [Source:MGI Symbol;Acc:MGI:1194908]
ENSMUSG00000028497	240.78	801.35	-1.7331	2.4318e-18	2.9747e-16	202	164	329	197	736	1000	915	910	Hacd4	3-hydroxyacyl-CoA dehydratase 4 [Source:MGI Symbol;Acc:MGI:1914025]
ENSMUSG00000041762	45.02	252.21	-2.4896	2.8284e-18	3.4455e-16	37	53	38	36	179	337	221	398	Gpr155	G protein-coupled receptor 155 [Source:MGI Symbol;Acc:MGI:1915776]
ENSMUSG00000051790	2378.17	997.72	1.2523	2.8756e-18	3.4887e-16	2107	2196	2126	2252	757	1270	1193	1257	Nlgn2	neuroligin 2 [Source:MGI Symbol;Acc:MGI:2681835]
ENSMUSG00000044162	1859.27	52.01	5.1647	2.9257e-18	3.535e-16	3571	460	1315	1265	99	49	40	29	Tnip3	TNFAIP3 interacting protein 3 [Source:MGI Symbol;Acc:MGI:3041165]
ENSMUSG00000078763	337.37	51.53	2.7195	3.0058e-18	3.617e-16	310	251	422	260	72	52	32	66	Slfn1	schlafen 1 [Source:MGI Symbol;Acc:MGI:1313259]
ENSMUSG00000047592	40.19	203.78	-2.3453	3.1949e-18	3.829e-16	48	27	38	33	227	209	269	189	Nxpe5	neurexophilin and PC-esterase domain family, member 5 [Source:MGI Symbol;Acc:MGI:3584036]
ENSMUSG00000104876	131.02	22.98	2.5031	3.3965e-18	4.0542e-16	125	147	89	113	18	30	27	28	Trdc	T cell receptor delta, constant region [Source:MGI Symbol;Acc:MGI:98612]
ENSMUSG00000050014	662.41	113.51	2.5422	3.565e-18	4.2382e-16	624	853	470	448	75	127	164	146	Apol10b	apolipoprotein L 10B [Source:MGI Symbol;Acc:MGI:3043522]
ENSMUSG00000038037	210.88	36.41	2.5472	3.8585e-18	4.5505e-16	150	225	254	149	50	31	34	42	Socs1	suppressor of cytokine signaling 1 [Source:MGI Symbol;Acc:MGI:1354910]
ENSMUSG00000055602	76.11	6.21	3.5996	3.8577e-18	4.5505e-16	81	48	65	83	4	6	6	12	Tcp10b	t-complex protein 10b [Source:MGI Symbol;Acc:MGI:98542]
ENSMUSG00000082361	142.46	37.96	1.899	4.1668e-18	4.8947e-16	120	113	147	143	27	56	44	44	Btc	betacellulin, epidermal growth factor family member [Source:MGI Symbol;Acc:MGI:99439]
ENSMUSG00000004936	3576.71	1565.68	1.192	4.6913e-18	5.489e-16	3275	2668	3782	3394	1487	1836	1663	1955	Map2k1	mitogen-activated protein kinase kinase 1 [Source:MGI Symbol;Acc:MGI:1346866]
ENSMUSG00000052631	199.07	19.81	3.3223	5.173e-18	6.0288e-16	263	211	108	129	15	29	25	20	Sh2d6	SH2 domain containing 6 [Source:MGI Symbol;Acc:MGI:1918380]
ENSMUSG00000049502	1889.23	396.01	2.254	5.9627e-18	6.9219e-16	1628	1033	2226	2086	336	464	361	605	Dtx3l	deltex 3-like, E3 ubiquitin ligase [Source:MGI Symbol;Acc:MGI:2656973]
ENSMUSG00000062007	119.97	21.08	2.5112	6.0645e-18	7.0125e-16	138	87	100	110	22	27	25	19	Hsh2d	hematopoietic SH2 domain containing [Source:MGI Symbol;Acc:MGI:2676364]
ENSMUSG00000022860	26.47	132.66	-2.3324	6.9449e-18	7.9994e-16	23	34	20	19	122	140	181	146	Chodl	chondrolectin [Source:MGI Symbol;Acc:MGI:2179069]
ENSMUSG00000035352	549.89	60.58	3.1843	8.6353e-18	9.9079e-16	791	458	447	279	70	64	45	86	Ccl12	chemokine (C-C motif) ligand 12 [Source:MGI Symbol;Acc:MGI:108224]
ENSMUSG00000054404	3391.39	865.25	1.9705	9.3446e-18	1.068e-15	3823	2212	3963	2414	719	1024	1026	1095	Slfn5	schlafen 5 [Source:MGI Symbol;Acc:MGI:1329004]
ENSMUSG00000071547	129.44	311.42	-1.2677	1.0801e-17	1.2297e-15	119	112	135	108	278	384	378	346	Nt5dc2	5'-nucleotidase domain containing 2 [Source:MGI Symbol;Acc:MGI:1917271]
ENSMUSG00000027875	146.39	715.19	-2.2871	1.1156e-17	1.2653e-15	78	170	186	109	532	766	954	957	Hmgcs2	3-hydroxy-3-methylglutaryl-Coenzyme A synthase 2 [Source:MGI Symbol;Acc:MGI:101939]
ENSMUSG00000037997	642.59	248.25	1.3734	1.2133e-17	1.3656e-15	594	523	589	641	255	277	249	314	Parp11	poly (ADP-ribose) polymerase family, member 11 [Source:MGI Symbol;Acc:MGI:2141505]
ENSMUSG00000115845	91.94	1.3	6.3241	1.2125e-17	1.3656e-15	100	88	98	49	4	1	0	0	4933402J15Rik	RIKEN cDNA 4933402J15 gene [Source:MGI Symbol;Acc:MGI:1921675]
ENSMUSG00000049580	893.14	165.02	2.4371	1.5559e-17	1.7446e-15	600	466	1293	976	161	170	208	191	Tsku	tsukushi, small leucine rich proteoglycan [Source:MGI Symbol;Acc:MGI:2443855]
ENSMUSG00000014361	291.2	869.82	-1.5779	1.6239e-17	1.8092e-15	236	206	371	264	679	1063	1052	1103	Mertk	MER proto-oncogene tyrosine kinase [Source:MGI Symbol;Acc:MGI:96965]
ENSMUSG00000039167	215.25	720.92	-1.7417	1.6257e-17	1.8092e-15	161	186	295	156	724	760	882	818	Adgrl4	adhesion G protein-coupled receptor L4 [Source:MGI Symbol;Acc:MGI:2655562]
ENSMUSG00000024338	2964.46	700.66	2.0818	2.0567e-17	2.2717e-15	2810	3034	2776	2183	919	600	707	807	Psmb8	proteasome (prosome, macropain) subunit, beta type 8 (large multifunctional peptidase 7) [Source:MGI Symbol;Acc:MGI:1346527]
ENSMUSG00000031216	198.96	663.63	-1.7379	2.1026e-17	2.3078e-15	171	172	245	145	461	873	822	834	Stard8	START domain containing 8 [Source:MGI Symbol;Acc:MGI:2448556]
ENSMUSG00000024079	3419.41	979.1	1.8037	2.1049e-17	2.3078e-15	3383	2161	3765	3235	688	1308	1256	1158	Eif2ak2	eukaryotic translation initiation factor 2-alpha kinase 2 [Source:MGI Symbol;Acc:MGI:1353449]
ENSMUSG00000058099	93.23	241.24	-1.3714	2.2179e-17	2.4226e-15	77	92	99	74	220	282	286	284	Nfam1	Nfat activating molecule with ITAM motif 1 [Source:MGI Symbol;Acc:MGI:1921289]
ENSMUSG00000040128	2130.03	851.68	1.3228	2.2414e-17	2.4393e-15	2132	1727	1863	2034	878	934	971	973	Pnrc1	proline-rich nuclear receptor coactivator 1 [Source:MGI Symbol;Acc:MGI:1917838]
ENSMUSG00000024349	3069.83	873.96	1.8134	2.3331e-17	2.5299e-15	2589	2185	3504	3030	1097	861	869	972	Sting1	stimulator of interferon response cGAMP interactor 1 [Source:MGI Symbol;Acc:MGI:1919762]
ENSMUSG00000002797	364.25	145.63	1.3214	2.4168e-17	2.611e-15	350	342	329	306	134	178	170	165	Ggct	gamma-glutamyl cyclotransferase [Source:MGI Symbol;Acc:MGI:95700]
ENSMUSG00000064246	7778.78	30.69	7.9885	2.6015e-17	2.8004e-15	19495	1272	2698	3522	55	32	17	25	Chil1	chitinase-like 1 [Source:MGI Symbol;Acc:MGI:1340899]
ENSMUSG00000039304	1767.42	373.9	2.2398	2.8741e-17	3.0826e-15	1993	1171	1744	1532	252	640	398	400	Tnfsf10	tumor necrosis factor (ligand) superfamily, member 10 [Source:MGI Symbol;Acc:MGI:107414]
ENSMUSG00000030263	24.23	132.38	-2.4334	2.9182e-17	3.1186e-15	13	17	39	22	129	151	163	143	Lrmp	lymphoid-restricted membrane protein [Source:MGI Symbol;Acc:MGI:108424]
ENSMUSG00000029322	21544	5447.66	1.9837	3.197e-17	3.4042e-15	20778	21089	23034	13856	6261	4952	5401	7210	Plac8	placenta-specific 8 [Source:MGI Symbol;Acc:MGI:2445289]
ENSMUSG00000032000	3550.23	581.45	2.6105	3.2803e-17	3.4697e-15	4250	1545	3414	3724	665	701	600	582	Birc3	baculoviral IAP repeat-containing 3 [Source:MGI Symbol;Acc:MGI:1197007]
ENSMUSG00000053113	8470.32	647.51	3.7103	3.2819e-17	3.4697e-15	6862	5899	9808	8677	1330	426	517	398	Socs3	suppressor of cytokine signaling 3 [Source:MGI Symbol;Acc:MGI:1201791]
ENSMUSG00000002307	3146.02	745.55	2.0777	3.4887e-17	3.6752e-15	2609	1711	4005	3323	840	784	827	817	Daxx	Fas death domain-associated protein [Source:MGI Symbol;Acc:MGI:1197015]
ENSMUSG00000016524	118.43	0.7	7.4532	3.6093e-17	3.7887e-15	106	71	157	104	1	1	0	1	Il19	interleukin 19 [Source:MGI Symbol;Acc:MGI:1890472]
ENSMUSG00000024805	765.62	281	1.4458	5.4117e-17	5.6607e-15	720	522	785	779	252	342	302	354	Pcgf5	polycomb group ring finger 5 [Source:MGI Symbol;Acc:MGI:1923505]
ENSMUSG00000024786	68.87	2.83	4.567	5.6134e-17	5.851e-15	94	45	64	46	1	4	4	4	Majin	membrane anchored junction protein [Source:MGI Symbol;Acc:MGI:1923913]
ENSMUSG00000025165	172.44	34.38	2.3363	6.5368e-17	6.7895e-15	105	196	202	134	41	32	40	37	Sectm1a	secreted and transmembrane 1A [Source:MGI Symbol;Acc:MGI:2384805]
ENSMUSG00000033576	478.18	83.86	2.5092	7.139e-17	7.3892e-15	407	459	537	353	57	65	94	161	Apol6	apolipoprotein L 6 [Source:MGI Symbol;Acc:MGI:1919189]
ENSMUSG00000027800	5001.09	1373.22	1.8645	8.2481e-17	8.5074e-15	5195	5312	3936	3665	1156	1573	2006	1394	Tm4sf1	transmembrane 4 superfamily member 1 [Source:MGI Symbol;Acc:MGI:104678]
ENSMUSG00000042302	328.59	918.83	-1.4821	8.5382e-17	8.7759e-15	246	240	430	302	789	1111	1080	1117	Ehbp1	EH domain binding protein 1 [Source:MGI Symbol;Acc:MGI:2667252]
ENSMUSG00000091549	1433.19	458.15	1.6449	1.0509e-16	1.0765e-14	1458	1502	1219	1022	406	541	496	596	Gm6548	predicted gene 6548 [Source:MGI Symbol;Acc:MGI:3644071]
ENSMUSG00000062300	2709.65	1342.51	1.0133	1.2867e-16	1.3089e-14	2373	2569	2384	2562	1312	1529	1490	1610	Nectin2	nectin cell adhesion molecule 2 [Source:MGI Symbol;Acc:MGI:97822]
ENSMUSG00000021943	117.54	645.87	-2.4565	1.297e-16	1.3149e-14	94	62	166	115	451	742	1057	658	Gdf10	growth differentiation factor 10 [Source:MGI Symbol;Acc:MGI:95684]
ENSMUSG00000002227	1003.25	334.74	1.5836	1.3032e-16	1.3167e-14	905	691	1104	987	302	390	321	475	Mov10	Mov10 RISC complex RNA helicase [Source:MGI Symbol;Acc:MGI:97054]
ENSMUSG00000085977	95.08	5.89	4.0203	1.3195e-16	1.3286e-14	36	66	135	120	6	6	9	5	Gm5970	predicted gene 5970 [Source:MGI Symbol;Acc:MGI:3646761]
ENSMUSG00000026271	297.09	72.18	2.0454	1.4458e-16	1.4508e-14	243	180	348	326	79	77	68	93	Gpr35	G protein-coupled receptor 35 [Source:MGI Symbol;Acc:MGI:1929509]
ENSMUSG00000030124	103.17	22.47	2.2062	2.0408e-16	2.041e-14	87	73	117	103	23	19	26	31	Lag3	lymphocyte-activation gene 3 [Source:MGI Symbol;Acc:MGI:106588]
ENSMUSG00000020108	1657.22	568.6	1.5441	2.0984e-16	2.0915e-14	1353	1342	1567	1813	623	618	517	739	Ddit4	DNA-damage-inducible transcript 4 [Source:MGI Symbol;Acc:MGI:1921997]
ENSMUSG00000021614	6183.08	1596.69	1.9529	2.1477e-16	2.1334e-14	6519	4835	7098	4182	1029	2048	2179	1959	Vcan	versican [Source:MGI Symbol;Acc:MGI:102889]
ENSMUSG00000041828	20.78	144.96	-2.8123	2.4092e-16	2.3852e-14	24	24	17	10	104	139	183	225	Abca8a	ATP-binding cassette, sub-family A (ABC1), member 8a [Source:MGI Symbol;Acc:MGI:2386846]
ENSMUSG00000003955	2038.63	733.66	1.4756	2.536e-16	2.5023e-14	1476	1929	2022	2063	869	750	807	778	Fam162a	family with sequence similarity 162, member A [Source:MGI Symbol;Acc:MGI:1917436]
ENSMUSG00000051439	7067.06	520.08	3.7648	2.5483e-16	2.5062e-14	12713	2920	4970	4566	777	495	480	475	Cd14	CD14 antigen [Source:MGI Symbol;Acc:MGI:88318]
ENSMUSG00000056144	531.74	208.36	1.3516	2.7013e-16	2.6479e-14	420	416	547	572	186	251	213	277	Trim34a	tripartite motif-containing 34A [Source:MGI Symbol;Acc:MGI:2137359]
ENSMUSG00000035357	226.36	552.05	-1.2854	3.2716e-16	3.1962e-14	201	162	261	209	495	620	692	648	Pdzrn3	PDZ domain containing RING finger 3 [Source:MGI Symbol;Acc:MGI:1933157]
ENSMUSG00000021109	10763	2767.27	1.9597	3.2826e-16	3.1964e-14	9291	5870	13430	11198	3070	3062	3216	2799	Hif1a	hypoxia inducible factor 1, alpha subunit [Source:MGI Symbol;Acc:MGI:106918]
ENSMUSG00000031129	84.66	317.05	-1.9018	3.4386e-16	3.3373e-14	73	52	120	69	275	376	413	349	Slc9a9	solute carrier family 9 (sodium/hydrogen exchanger), member 9 [Source:MGI Symbol;Acc:MGI:2679732]
ENSMUSG00000044294	253.08	39.39	2.6791	3.5903e-16	3.4732e-14	339	192	204	177	30	65	34	48	Krt84	keratin 84 [Source:MGI Symbol;Acc:MGI:96700]
ENSMUSG00000020277	4544.4	1808.31	1.3294	3.678e-16	3.5464e-14	3808	4728	3660	4360	1718	1966	1976	2353	Pfkl	phosphofructokinase, liver, B-type [Source:MGI Symbol;Acc:MGI:97547]
ENSMUSG00000024678	1150.58	325.44	1.821	4.0432e-16	3.8859e-14	1233	1068	1150	738	254	355	392	456	Ms4a4d	membrane-spanning 4-domains, subfamily A, member 4D [Source:MGI Symbol;Acc:MGI:1913857]
ENSMUSG00000064294	63.5	483.48	-2.9309	6.0506e-16	5.7777e-14	81	47	71	32	230	650	622	705	Aox3	aldehyde oxidase 3 [Source:MGI Symbol;Acc:MGI:1918974]
ENSMUSG00000033910	170.18	717.71	-2.0748	6.1861e-16	5.8881e-14	127	169	243	92	671	894	789	832	Gucy1a1	guanylate cyclase 1, soluble, alpha 1 [Source:MGI Symbol;Acc:MGI:1926562]
ENSMUSG00000037872	680.22	129.43	2.3977	6.4615e-16	6.1306e-14	649	763	614	448	181	99	134	143	Ackr1	atypical chemokine receptor 1 (Duffy blood group) [Source:MGI Symbol;Acc:MGI:1097689]
ENSMUSG00000054136	186.27	10.13	4.2208	6.5381e-16	6.1834e-14	261	198	92	112	17	15	7	4	Adm2	adrenomedullin 2 [Source:MGI Symbol;Acc:MGI:2675256]
ENSMUSG00000021025	12007.7	2364.44	2.3445	7.4293e-16	7.0039e-14	12102	6225	11371	14219	2842	2549	3009	1920	Nfkbia	nuclear factor of kappa light polypeptide gene enhancer in B cells inhibitor, alpha [Source:MGI Symbol;Acc:MGI:104741]
ENSMUSG00000062070	11065.4	5202.67	1.0889	8.0396e-16	7.5552e-14	9849	9466	10985	10209	5694	5728	5983	5452	Pgk1	phosphoglycerate kinase 1 [Source:MGI Symbol;Acc:MGI:97555]
ENSMUSG00000024299	431.05	916.64	-1.0899	8.7253e-16	8.1736e-14	390	404	392	387	755	1074	1089	1177	Adamts10	a disintegrin-like and metallopeptidase (reprolysin type) with thrombospondin type 1 motif, 10 [Source:MGI Symbol;Acc:MGI:2449112]
ENSMUSG00000031214	114.12	351.78	-1.6255	1.0722e-15	1.0012e-13	81	131	106	100	268	475	444	392	Ophn1	oligophrenin 1 [Source:MGI Symbol;Acc:MGI:2151070]
ENSMUSG00000030142	708.29	103.82	2.7758	1.0845e-15	1.0095e-13	578	465	1012	575	168	98	78	97	Clec4e	C-type lectin domain family 4, member e [Source:MGI Symbol;Acc:MGI:1861232]
ENSMUSG00000008496	189.37	63.99	1.5623	1.1359e-15	1.054e-13	185	176	175	154	56	77	67	85	Pou2f2	POU domain, class 2, transcription factor 2 [Source:MGI Symbol;Acc:MGI:101897]
ENSMUSG00000066363	528.43	24.62	4.4423	1.1599e-15	1.073e-13	405	418	799	344	60	16	12	11	Serpina3f	serine (or cysteine) peptidase inhibitor, clade A, member 3F [Source:MGI Symbol;Acc:MGI:2182838]
ENSMUSG00000041481	1340.07	93.98	3.8391	1.32e-15	1.2173e-13	1188	1498	1520	704	198	50	64	74	Serpina3g	serine (or cysteine) peptidase inhibitor, clade A, member 3G [Source:MGI Symbol;Acc:MGI:105046]
ENSMUSG00000035948	46.21	469.74	-3.3389	1.5925e-15	1.464e-13	25	17	97	37	327	613	550	626	Acss3	acyl-CoA synthetase short-chain family member 3 [Source:MGI Symbol;Acc:MGI:2685720]
ENSMUSG00000062980	877.58	2486.28	-1.5022	1.6478e-15	1.5102e-13	728	592	1059	861	1906	3144	2811	3289	Cped1	cadherin-like and PC-esterase domain containing 1 [Source:MGI Symbol;Acc:MGI:2444814]
ENSMUSG00000023961	1277.56	294.93	2.1143	1.7051e-15	1.5578e-13	1427	641	1401	1207	231	358	336	396	Enpp4	ectonucleotide pyrophosphatase/phosphodiesterase 4 [Source:MGI Symbol;Acc:MGI:2682634]
ENSMUSG00000026479	5922.62	2248.68	1.3974	1.8068e-15	1.6457e-13	5614	4741	5351	5908	2594	2454	2543	2252	Lamc2	laminin, gamma 2 [Source:MGI Symbol;Acc:MGI:99913]
ENSMUSG00000031451	2147.01	5331.01	-1.3122	1.817e-15	1.6499e-13	2050	1985	2215	1598	4344	5904	6338	7234	Gas6	growth arrest specific 6 [Source:MGI Symbol;Acc:MGI:95660]
ENSMUSG00000027580	5861.14	1132.68	2.3715	1.9035e-15	1.7232e-13	4821	2502	6509	7815	1091	1350	1224	1353	Helz2	helicase with zinc finger 2, transcriptional coactivator [Source:MGI Symbol;Acc:MGI:2385169]
ENSMUSG00000027398	1063.33	49.12	4.4453	2.0863e-15	1.8804e-13	925	962	1079	929	118	31	37	12	Il1b	interleukin 1 beta [Source:MGI Symbol;Acc:MGI:96543]
ENSMUSG00000039501	4926.66	1289.98	1.9331	2.0899e-15	1.8804e-13	4317	2664	6095	5127	1024	1670	1325	1757	Znfx1	zinc finger, NFX1-type containing 1 [Source:MGI Symbol;Acc:MGI:2138982]
ENSMUSG00000024921	664.65	1950.14	-1.5521	2.2134e-15	1.9855e-13	452	469	860	687	1820	2177	2223	2432	Smarca2	SWI/SNF related, matrix associated, actin dependent regulator of chromatin, subfamily a, member 2 [Source:MGI Symbol;Acc:MGI:99603]
ENSMUSG00000020262	265.86	775.92	-1.5447	2.226e-15	1.9908e-13	214	188	322	258	580	905	917	1080	Adarb1	adenosine deaminase, RNA-specific, B1 [Source:MGI Symbol;Acc:MGI:891999]
ENSMUSG00000112627	183.55	46.38	1.9764	2.7636e-15	2.4641e-13	182	198	152	134	32	60	57	60	4933412E12Rik	RIKEN cDNA 4933412E12 gene [Source:MGI Symbol;Acc:MGI:1918336]
ENSMUSG00000038067	5552.83	246.63	4.4921	2.9878e-15	2.656e-13	11612	1593	2817	3524	103	438	268	323	Csf3	colony stimulating factor 3 (granulocyte) [Source:MGI Symbol;Acc:MGI:1339751]
ENSMUSG00000031278	4184.41	1844.59	1.1816	3.0596e-15	2.7117e-13	3528	3717	3724	4327	1609	2330	2454	1829	Acsl4	acyl-CoA synthetase long-chain family member 4 [Source:MGI Symbol;Acc:MGI:1354713]
ENSMUSG00000067212	6452.16	2939.31	1.1344	3.1696e-15	2.8008e-13	5003	6432	6473	5759	2853	3002	3248	3901	H2-T23	histocompatibility 2, T region locus 23 [Source:MGI Symbol;Acc:MGI:95957]
ENSMUSG00000070427	809.96	281.34	1.5279	3.4139e-15	3.0077e-13	585	777	866	753	321	250	309	351	Il18bp	interleukin 18 binding protein [Source:MGI Symbol;Acc:MGI:1333800]
ENSMUSG00000022094	5427.08	1028.31	2.3999	3.5421e-15	3.1113e-13	3509	2511	7948	6330	870	1302	1195	1223	Slc39a14	solute carrier family 39 (zinc transporter), member 14 [Source:MGI Symbol;Acc:MGI:2384851]
ENSMUSG00000007097	38.65	241.64	-2.6428	3.9878e-15	3.4925e-13	33	30	53	27	136	219	340	400	Atp1a2	ATPase, Na+/K+ transporting, alpha 2 polypeptide [Source:MGI Symbol;Acc:MGI:88106]
ENSMUSG00000093661	450.27	190.4	1.2407	4.6395e-15	4.0513e-13	436	391	451	367	169	211	214	253	Eif4e3	eukaryotic translation initiation factor 4E member 3 [Source:MGI Symbol;Acc:MGI:1914142]
ENSMUSG00000022216	4204.21	1297.9	1.6959	4.6879e-15	4.0815e-13	3933	4792	3447	3094	1452	1279	1485	1474	Psme1	proteasome (prosome, macropain) activator subunit 1 (PA28 alpha) [Source:MGI Symbol;Acc:MGI:1096367]
ENSMUSG00000017715	2704.92	1039.92	1.3798	4.8794e-15	4.2358e-13	1974	2138	2987	2879	1171	1201	1129	1060	Pgs1	phosphatidylglycerophosphate synthase 1 [Source:MGI Symbol;Acc:MGI:1921701]
ENSMUSG00000052516	62.93	255.35	-2.0231	4.959e-15	4.2923e-13	71	34	67	58	188	349	325	286	Robo2	roundabout guidance receptor 2 [Source:MGI Symbol;Acc:MGI:1890110]
ENSMUSG00000030474	169.12	42.57	1.9961	5.0782e-15	4.3826e-13	129	185	193	115	47	52	38	50	Siglece	sialic acid binding Ig-like lectin E [Source:MGI Symbol;Acc:MGI:1932475]
ENSMUSG00000037443	9131.06	1283.71	2.8306	5.6734e-15	4.8821e-13	12302	9014	4580	6685	1477	1418	921	1802	Cep85	centrosomal protein 85 [Source:MGI Symbol;Acc:MGI:1917262]
ENSMUSG00000026072	1383.47	614.18	1.1709	6.4692e-15	5.5507e-13	1276	1269	1487	1035	511	780	748	705	Il1r1	interleukin 1 receptor, type I [Source:MGI Symbol;Acc:MGI:96545]
ENSMUSG00000068323	49.06	253.23	-2.3672	8.0348e-15	6.8742e-13	27	45	47	62	144	302	381	322	Slc4a5	solute carrier family 4, sodium bicarbonate cotransporter, member 5 [Source:MGI Symbol;Acc:MGI:2443220]
ENSMUSG00000036249	649.48	287.42	1.1779	8.7801e-15	7.4901e-13	598	502	707	576	298	313	314	342	Rbm43	RNA binding motif protein 43 [Source:MGI Symbol;Acc:MGI:1918934]
ENSMUSG00000022957	772.23	1574.77	-1.028	1.0692e-14	9.0689e-13	656	660	857	665	1332	1881	1726	2087	Itsn1	intersectin 1 (SH3 domain protein 1A) [Source:MGI Symbol;Acc:MGI:1338069]
ENSMUSG00000001630	1330.99	443.88	1.5847	1.162e-14	9.8282e-13	1183	904	1168	1613	447	465	536	512	Stk38l	serine/threonine kinase 38 like [Source:MGI Symbol;Acc:MGI:1922250]
ENSMUSG00000011263	17.16	155.69	-3.1884	1.2627e-14	1.0649e-12	16	28	14	4	147	196	212	136	Exoc3l2	exocyst complex component 3-like 2 [Source:MGI Symbol;Acc:MGI:1921713]
ENSMUSG00000022575	3307.34	801.38	2.0455	1.3317e-14	1.1199e-12	2091	1966	4256	3995	854	768	903	999	Gsdmd	gasdermin D [Source:MGI Symbol;Acc:MGI:1916396]
ENSMUSG00000031779	177.65	21.53	3.0634	1.3396e-14	1.1234e-12	162	171	150	164	36	11	31	13	Ccl22	chemokine (C-C motif) ligand 22 [Source:MGI Symbol;Acc:MGI:1306779]
ENSMUSG00000069874	2282.85	507.24	2.1693	1.3792e-14	1.1533e-12	1943	2065	2312	2046	294	579	465	960	Irgm2	immunity-related GTPase family M member 2 [Source:MGI Symbol;Acc:MGI:1926262]
ENSMUSG00000041482	171.14	379.03	-1.1476	1.4144e-14	1.1794e-12	142	145	186	156	305	469	487	435	Piezo2	piezo-type mechanosensitive ion channel component 2 [Source:MGI Symbol;Acc:MGI:1918781]
ENSMUSG00000000555	19390.5	8022.56	1.2732	1.4819e-14	1.2287e-12	15164	17833	16976	20980	7079	8128	11108	9376	Itga5	integrin alpha 5 (fibronectin receptor alpha) [Source:MGI Symbol;Acc:MGI:96604]
ENSMUSG00000023307	2284	1032.97	1.1451	1.4781e-14	1.2287e-12	2230	1808	2416	1906	1055	1116	1232	1155	Marchf5	membrane associated ring-CH-type finger 5 [Source:MGI Symbol;Acc:MGI:1915207]
ENSMUSG00000043953	1012.05	102.14	3.3112	1.6474e-14	1.3622e-12	1154	289	1043	1218	148	117	76	98	Ccrl2	chemokine (C-C motif) receptor-like 2 [Source:MGI Symbol;Acc:MGI:1920904]
ENSMUSG00000028883	946.33	361.04	1.3894	1.7375e-14	1.4327e-12	962	946	829	701	315	410	448	435	Sema3a	sema domain, immunoglobulin domain (Ig), short basic domain, secreted, (semaphorin) 3A [Source:MGI Symbol;Acc:MGI:107558]
ENSMUSG00000050627	817.99	1733.18	-1.0836	1.7781e-14	1.4621e-12	650	848	778	718	1462	2225	2191	1861	Gpd1l	glycerol-3-phosphate dehydrogenase 1-like [Source:MGI Symbol;Acc:MGI:1289257]
ENSMUSG00000028364	7158.21	1494.47	2.2597	1.8029e-14	1.4783e-12	6983	6863	3780	8204	938	1926	2030	1866	Tnc	tenascin C [Source:MGI Symbol;Acc:MGI:101922]
ENSMUSG00000069793	652.51	183.04	1.8332	1.8518e-14	1.5143e-12	649	375	733	639	158	271	179	209	Slfn9	schlafen 9 [Source:MGI Symbol;Acc:MGI:2445121]
ENSMUSG00000101389	324.77	110.23	1.5592	1.9085e-14	1.5564e-12	296	212	373	314	101	139	141	109	Ms4a4a	membrane-spanning 4-domains, subfamily A, member 4A [Source:MGI Symbol;Acc:MGI:3643932]
ENSMUSG00000038011	322.45	86.55	1.8944	1.9382e-14	1.5762e-12	228	260	379	325	60	121	76	133	Dnah10	dynein, axonemal, heavy chain 10 [Source:MGI Symbol;Acc:MGI:1860299]
ENSMUSG00000029765	64.27	275.63	-2.1004	2.2954e-14	1.8616e-12	56	50	80	51	174	410	406	258	Plxna4	plexin A4 [Source:MGI Symbol;Acc:MGI:2179061]
ENSMUSG00000078307	0.99	94.94	-6.4666	2.3507e-14	1.9012e-12	0	0	4	0	51	183	82	117	AI593442	expressed sequence AI593442 [Source:MGI Symbol;Acc:MGI:2143099]
ENSMUSG00000037580	1965.38	402.9	2.2873	3.2464e-14	2.6114e-12	2334	1038	1880	1902	536	387	388	432	Gch1	GTP cyclohydrolase 1 [Source:MGI Symbol;Acc:MGI:95675]
ENSMUSG00000030748	9032.95	3273.09	1.4646	4.2399e-14	3.4013e-12	7987	6960	11908	6501	3201	3492	4050	3737	Il4ra	interleukin 4 receptor, alpha [Source:MGI Symbol;Acc:MGI:105367]
ENSMUSG00000074248	2.49	51.4	-4.3882	4.4807e-14	3.5848e-12	1	5	1	2	34	66	59	73	4930432M17Rik	RIKEN cDNA 4930432M17 gene [Source:MGI Symbol;Acc:MGI:3588188]
ENSMUSG00000038058	1754.63	749.84	1.2261	4.496e-14	3.5873e-12	1305	1557	1742	1843	600	870	820	1064	Nod1	nucleotide-binding oligomerization domain containing 1 [Source:MGI Symbol;Acc:MGI:1341839]
ENSMUSG00000042608	1951.62	898.38	1.12	4.5775e-14	3.6426e-12	1760	1654	1938	1791	968	929	933	1119	Stk40	serine/threonine kinase 40 [Source:MGI Symbol;Acc:MGI:1921428]
ENSMUSG00000039109	523.56	2627.55	-2.3276	4.7025e-14	3.732e-12	690	249	559	407	2131	3328	3695	2602	F13a1	coagulation factor XIII, A1 subunit [Source:MGI Symbol;Acc:MGI:1921395]
ENSMUSG00000039364	681.58	115.57	2.5646	4.7818e-14	3.7796e-12	514	513	955	549	177	117	130	70	Sectm1b	secreted and transmembrane 1B [Source:MGI Symbol;Acc:MGI:1929083]
ENSMUSG00000021070	551.51	216.74	1.3483	4.788e-14	3.7796e-12	451	413	581	583	206	221	232	301	Bdkrb2	bradykinin receptor, beta 2 [Source:MGI Symbol;Acc:MGI:102845]
ENSMUSG00000063234	44.89	2.15	4.4567	5.27e-14	4.149e-12	39	27	58	42	4	2	2	1	Gpr84	G protein-coupled receptor 84 [Source:MGI Symbol;Acc:MGI:1934129]
ENSMUSG00000041135	816.96	222.87	1.8746	5.6418e-14	4.4299e-12	718	433	888	969	218	248	231	289	Ripk2	receptor (TNFRSF)-interacting serine-threonine kinase 2 [Source:MGI Symbol;Acc:MGI:1891456]
ENSMUSG00000038349	66.46	235.86	-1.8304	6.1677e-14	4.8301e-12	59	68	67	49	158	335	330	242	Plcl1	phospholipase C-like 1 [Source:MGI Symbol;Acc:MGI:3036262]
ENSMUSG00000022014	932.95	269.48	1.7921	6.2347e-14	4.8697e-12	1038	868	877	605	283	327	343	235	Epsti1	epithelial stromal interaction 1 (breast) [Source:MGI Symbol;Acc:MGI:1915168]
ENSMUSG00000079659	546.19	240.59	1.1822	6.3081e-14	4.914e-12	509	419	519	550	219	310	295	246	Tmem243	transmembrane protein 243, mitochondrial [Source:MGI Symbol;Acc:MGI:3606159]
ENSMUSG00000042349	2858.58	601.26	2.2494	7.1288e-14	5.5387e-12	3771	1574	2220	2756	630	693	533	793	Ikbke	inhibitor of kappaB kinase epsilon [Source:MGI Symbol;Acc:MGI:1929612]
ENSMUSG00000040473	1205.38	188.54	2.6777	8.7089e-14	6.7311e-12	1814	624	864	1023	240	197	201	181	Cfap69	cilia and flagella associated protein 69 [Source:MGI Symbol;Acc:MGI:2443778]
ENSMUSG00000057914	134.07	394.58	-1.56	8.8314e-14	6.808e-12	134	124	133	98	279	451	520	525	Cacnb2	calcium channel, voltage-dependent, beta 2 subunit [Source:MGI Symbol;Acc:MGI:894644]
ENSMUSG00000026581	130.94	17.53	2.9114	9.5589e-14	7.3497e-12	150	115	131	80	22	7	23	24	Sell	selectin, lymphocyte [Source:MGI Symbol;Acc:MGI:98279]
ENSMUSG00000020806	1795.17	566.32	1.6651	9.7178e-14	7.4525e-12	1440	1059	2061	2069	609	626	654	602	Rhbdf2	rhomboid 5 homolog 2 [Source:MGI Symbol;Acc:MGI:2442473]
ENSMUSG00000027366	3704.37	1714.13	1.112	9.7642e-14	7.4688e-12	3382	2766	4274	3197	1714	1914	2063	1884	Sppl2a	signal peptide peptidase like 2A [Source:MGI Symbol;Acc:MGI:1913802]
ENSMUSG00000045349	1394.85	198.26	2.8176	1.0004e-13	7.6322e-12	1306	1218	1534	1054	359	149	126	197	Sh2d5	SH2 domain containing 5 [Source:MGI Symbol;Acc:MGI:2446215]
ENSMUSG00000039519	373.88	57	2.7139	1.0166e-13	7.7358e-12	364	521	298	169	55	45	73	79	Cyp7b1	cytochrome P450, family 7, subfamily b, polypeptide 1 [Source:MGI Symbol;Acc:MGI:104978]
ENSMUSG00000028996	6.61	57.65	-3.1326	1.138e-13	8.6379e-12	4	10	4	6	58	81	49	67	Rbp7	retinol binding protein 7, cellular [Source:MGI Symbol;Acc:MGI:1890409]
ENSMUSG00000032484	89.64	0.49	7.6303	1.1793e-13	8.9282e-12	80	88	92	68	1	0	1	0	Ngp	neutrophilic granule protein [Source:MGI Symbol;Acc:MGI:105983]
ENSMUSG00000052698	185.39	495.6	-1.4181	1.1902e-13	8.9875e-12	138	136	205	205	375	670	576	604	Tln2	talin 2 [Source:MGI Symbol;Acc:MGI:1917799]
ENSMUSG00000057465	89.79	0.21	8.3521	1.195e-13	9.0008e-12	75	148	59	42	0	0	1	0	Saa2	serum amyloid A 2 [Source:MGI Symbol;Acc:MGI:98222]
ENSMUSG00000043415	136.22	375.26	-1.463	1.2158e-13	9.1345e-12	138	115	146	99	339	434	376	519	Otud1	OTU domain containing 1 [Source:MGI Symbol;Acc:MGI:1918448]
ENSMUSG00000023078	67.65	3.16	4.4209	1.3253e-13	9.9067e-12	68	95	61	21	3	3	4	4	Cxcl13	chemokine (C-X-C motif) ligand 13 [Source:MGI Symbol;Acc:MGI:1888499]
ENSMUSG00000019082	1222.79	416.63	1.554	1.3837e-13	1.0318e-11	1195	750	1334	1208	432	483	403	519	Slc25a22	solute carrier family 25 (mitochondrial carrier, glutamate), member 22 [Source:MGI Symbol;Acc:MGI:1915517]
ENSMUSG00000036565	259.48	624.44	-1.2665	1.5055e-13	1.1197e-11	197	261	305	193	514	783	746	748	Ttyh3	tweety family member 3 [Source:MGI Symbol;Acc:MGI:1925589]
ENSMUSG00000079022	94.05	12.88	2.9032	1.5932e-13	1.182e-11	79	93	78	93	23	6	13	12	Col22a1	collagen, type XXII, alpha 1 [Source:MGI Symbol;Acc:MGI:1916950]
ENSMUSG00000033083	162.79	465.22	-1.5128	1.7405e-13	1.2881e-11	117	136	221	130	381	576	626	497	Tbc1d4	TBC1 domain family, member 4 [Source:MGI Symbol;Acc:MGI:2429660]
ENSMUSG00000026443	45.09	239.63	-2.4155	1.9784e-13	1.4532e-11	50	52	38	23	157	288	392	245	Lrrn2	leucine rich repeat protein 2, neuronal [Source:MGI Symbol;Acc:MGI:106037]
ENSMUSG00000007805	310.9	70.86	2.1363	1.9767e-13	1.4532e-11	295	333	217	281	80	55	66	109	Twist2	twist basic helix-loop-helix transcription factor 2 [Source:MGI Symbol;Acc:MGI:104685]
ENSMUSG00000022651	87.2	5.57	3.9595	1.9704e-13	1.4532e-11	118	102	61	31	4	5	10	6	Retnlg	resistin like gamma [Source:MGI Symbol;Acc:MGI:2667763]
ENSMUSG00000042677	2858.35	341.51	3.0662	2.5038e-13	1.8301e-11	3783	1015	2992	2616	531	323	361	242	Zc3h12a	zinc finger CCCH type containing 12A [Source:MGI Symbol;Acc:MGI:2385891]
ENSMUSG00000066258	820.41	331.2	1.3069	2.6113e-13	1.9039e-11	786	828	672	695	261	443	375	405	Trim12a	tripartite motif-containing 12A [Source:MGI Symbol;Acc:MGI:1923931]
ENSMUSG00000037010	1092.95	90.15	3.6041	2.675e-13	1.9408e-11	1331	1386	678	519	177	56	75	66	Apln	apelin [Source:MGI Symbol;Acc:MGI:1353624]
ENSMUSG00000028019	321.62	773.59	-1.2672	2.7814e-13	2.0131e-11	298	301	339	239	600	971	1041	856	Pdgfc	platelet-derived growth factor, C polypeptide [Source:MGI Symbol;Acc:MGI:1859631]
ENSMUSG00000020154	642.11	1968.69	-1.6161	2.8493e-13	2.0572e-11	473	527	842	537	1256	2524	2615	2504	Ptprb	protein tyrosine phosphatase, receptor type, B [Source:MGI Symbol;Acc:MGI:97809]
ENSMUSG00000074766	44.62	180.38	-2.0109	3.0934e-13	2.228e-11	28	32	59	47	125	208	204	275	Ism1	isthmin 1, angiogenesis inhibitor [Source:MGI Symbol;Acc:MGI:2442963]
ENSMUSG00000006403	3578.87	662.57	2.4336	3.1905e-13	2.2923e-11	3356	1299	4042	4494	745	747	757	657	Adamts4	a disintegrin-like and metallopeptidase (reprolysin type) with thrombospondin type 1 motif, 4 [Source:MGI Symbol;Acc:MGI:1339949]
ENSMUSG00000017713	330.83	85.73	1.9516	3.6525e-13	2.618e-11	316	380	265	239	103	91	71	109	Tha1	threonine aldolase 1 [Source:MGI Symbol;Acc:MGI:1919026]
ENSMUSG00000060675	1199.42	597.37	1.0068	3.8045e-13	2.7203e-11	965	1127	1289	1025	622	625	659	726	Plaat3	phospholipase A and acyltransferase 3 [Source:MGI Symbol;Acc:MGI:2179715]
ENSMUSG00000030306	286.13	864.62	-1.5965	3.8306e-13	2.726e-11	240	290	269	247	537	1326	1042	1012	Tmtc1	transmembrane and tetratricopeptide repeat containing 1 [Source:MGI Symbol;Acc:MGI:3039590]
ENSMUSG00000051506	54.72	214.08	-1.963	3.8309e-13	2.726e-11	49	29	78	47	223	251	267	203	Wdfy4	WD repeat and FYVE domain containing 4 [Source:MGI Symbol;Acc:MGI:3584510]
ENSMUSG00000078161	661.67	34.38	4.2753	4.0531e-13	2.8772e-11	532	144	897	891	71	35	21	15	Erich3	glutamate rich 3 [Source:MGI Symbol;Acc:MGI:1919095]
ENSMUSG00000002233	10606.3	4270.46	1.3126	4.235e-13	2.9929e-11	9777	8625	10876	9563	5032	4039	4524	5053	Rhoc	ras homolog family member C [Source:MGI Symbol;Acc:MGI:106028]
ENSMUSG00000052336	17.23	182.83	-3.3901	4.2362e-13	2.9929e-11	7	9	39	11	247	220	173	151	Cx3cr1	chemokine (C-X3-C motif) receptor 1 [Source:MGI Symbol;Acc:MGI:1333815]
ENSMUSG00000039031	247.95	573.66	-1.209	4.3408e-13	3.0595e-11	183	253	281	196	539	658	743	605	Arhgap18	Rho GTPase activating protein 18 [Source:MGI Symbol;Acc:MGI:1921160]
ENSMUSG00000055994	498.19	58.79	3.0848	4.3642e-13	3.0686e-11	706	151	383	558	69	65	53	70	Nod2	nucleotide-binding oligomerization domain containing 2 [Source:MGI Symbol;Acc:MGI:2429397]
ENSMUSG00000001750	5648.67	1777.53	1.6683	4.3913e-13	3.0804e-11	5173	3179	6538	5915	1994	1847	1919	2033	Tcirg1	T cell, immune regulator 1, ATPase, H+ transporting, lysosomal V0 protein A3 [Source:MGI Symbol;Acc:MGI:1350931]
ENSMUSG00000050737	5512.3	425.96	3.6943	4.407e-13	3.0841e-11	1850	1572	8967	8511	602	395	416	420	Ptges	prostaglandin E synthase [Source:MGI Symbol;Acc:MGI:1927593]
ENSMUSG00000022035	1235.35	568.53	1.1198	4.4288e-13	3.092e-11	1265	987	1255	1004	560	651	665	639	Ccdc25	coiled-coil domain containing 25 [Source:MGI Symbol;Acc:MGI:1914429]
ENSMUSG00000035186	99.43	3.42	4.823	4.5243e-13	3.1513e-11	65	127	66	104	0	1	13	2	Ubd	ubiquitin D [Source:MGI Symbol;Acc:MGI:1344410]
ENSMUSG00000056116	7190.86	2859.94	1.3304	4.6755e-13	3.249e-11	5200	6117	8878	6401	2950	2920	2867	3868	H2-T22	histocompatibility 2, T region locus 22 [Source:MGI Symbol;Acc:MGI:95956]
ENSMUSG00000051041	10.61	65.07	-2.6369	5.1365e-13	3.5609e-11	15	11	8	4	60	78	74	77	Olfml1	olfactomedin-like 1 [Source:MGI Symbol;Acc:MGI:2679264]
ENSMUSG00000022754	1208.64	501.03	1.2701	5.1767e-13	3.5804e-11	1112	921	1487	930	418	592	598	629	Tmem45a	transmembrane protein 45a [Source:MGI Symbol;Acc:MGI:1913122]
ENSMUSG00000058427	4076.15	31.52	7.0199	5.3183e-13	3.6697e-11	8385	879	1520	3541	79	14	13	20	Cxcl2	chemokine (C-X-C motif) ligand 2 [Source:MGI Symbol;Acc:MGI:1340094]
ENSMUSG00000044534	606.07	200.17	1.5974	5.3669e-13	3.6947e-11	503	529	590	599	162	203	190	339	Ackr2	atypical chemokine receptor 2 [Source:MGI Symbol;Acc:MGI:1891697]
ENSMUSG00000047986	14.47	106.86	-2.8984	5.3939e-13	3.7046e-11	19	10	9	14	59	122	115	189	Palm3	paralemmin 3 [Source:MGI Symbol;Acc:MGI:1921587]
ENSMUSG00000027955	250.98	833.21	-1.733	5.5482e-13	3.793e-11	304	191	207	206	601	974	999	1171	Gask1b	golgi associated kinase 1B [Source:MGI Symbol;Acc:MGI:1915909]
ENSMUSG00000040229	8.63	77.45	-3.1327	5.7921e-13	3.9506e-11	2	4	17	10	86	87	91	76	Gpr34	G protein-coupled receptor 34 [Source:MGI Symbol;Acc:MGI:1346334]
ENSMUSG00000027227	177.36	517.82	-1.5456	5.8603e-13	3.9879e-11	163	116	210	164	407	545	610	755	Sord	sorbitol dehydrogenase [Source:MGI Symbol;Acc:MGI:98266]
ENSMUSG00000026656	1987.15	859.29	1.2097	6.592e-13	4.4717e-11	1877	1377	2231	1813	821	1055	1065	869	Fcgr2b	Fc receptor, IgG, low affinity IIb [Source:MGI Symbol;Acc:MGI:95499]
ENSMUSG00000023206	1257.37	225.63	2.4776	6.6014e-13	4.4717e-11	1005	495	1763	1417	150	313	326	230	Il15ra	interleukin 15 receptor, alpha chain [Source:MGI Symbol;Acc:MGI:104644]
ENSMUSG00000044350	1299.98	436.16	1.5749	7.722e-13	5.2189e-11	1407	806	1472	1076	344	569	518	523	Lacc1	laccase domain containing 1 [Source:MGI Symbol;Acc:MGI:2445077]
ENSMUSG00000029826	3599.09	1426.8	1.335	7.9064e-13	5.3313e-11	3148	2266	3922	3905	1352	1661	1544	1769	Zc3hav1	zinc finger CCCH type, antiviral 1 [Source:MGI Symbol;Acc:MGI:1926031]
ENSMUSG00000090942	238.74	22.05	3.4345	8.0456e-13	5.4128e-11	92	88	362	359	17	32	30	20	F830016B08Rik	RIKEN cDNA F830016B08 gene [Source:MGI Symbol;Acc:MGI:3588218]
ENSMUSG00000047407	1772.7	838.34	1.0808	8.3303e-13	5.5917e-11	1544	1638	1487	1796	886	956	897	953	Tgif1	TGFB-induced factor homeobox 1 [Source:MGI Symbol;Acc:MGI:1194497]
ENSMUSG00000038774	1864.64	853.83	1.1273	8.8627e-13	5.9356e-11	1603	1343	2071	1843	857	1070	989	859	Ascc3	activating signal cointegrator 1 complex subunit 3 [Source:MGI Symbol;Acc:MGI:1925237]
ENSMUSG00000002111	823.87	334.41	1.3026	9.1917e-13	6.1421e-11	777	698	876	666	383	382	389	311	Spi1	spleen focus forming virus (SFFV) proviral integration oncogene [Source:MGI Symbol;Acc:MGI:98282]
ENSMUSG00000020826	3474.41	21.29	7.3567	9.2381e-13	6.1592e-11	1730	189	5233	5958	50	9	14	13	Nos2	nitric oxide synthase 2, inducible [Source:MGI Symbol;Acc:MGI:97361]
ENSMUSG00000026068	103.83	27.07	1.9357	9.3677e-13	6.2315e-11	103	73	119	86	22	30	42	27	Il18rap	interleukin 18 receptor accessory protein [Source:MGI Symbol;Acc:MGI:1338888]
ENSMUSG00000038457	5.18	44.09	-3.0908	9.4203e-13	6.2525e-11	4	5	5	5	36	48	63	50	Tmem255b	transmembrane protein 255B [Source:MGI Symbol;Acc:MGI:2685533]
ENSMUSG00000030643	34.95	161.6	-2.2079	9.9681e-13	6.6013e-11	23	43	43	20	108	209	174	238	Rab30	RAB30, member RAS oncogene family [Source:MGI Symbol;Acc:MGI:1923235]
ENSMUSG00000030144	251.42	30.18	3.0711	1.053e-12	6.9575e-11	339	221	218	128	53	23	28	23	Clec4d	C-type lectin domain family 4, member d [Source:MGI Symbol;Acc:MGI:1298389]
ENSMUSG00000057554	2865.19	1395.11	1.0383	1.2476e-12	8.2071e-11	2639	2045	3203	2639	1280	1745	1590	1585	Lgals8	lectin, galactose binding, soluble 8 [Source:MGI Symbol;Acc:MGI:1928481]
ENSMUSG00000117093	8.7	81.97	-3.2336	1.2922e-12	8.4816e-11	13	2	14	3	83	98	77	104	Gm49949	predicted gene, 49949 [Source:MGI Symbol;Acc:MGI:6270668]
ENSMUSG00000037405	10377.5	1117.32	3.2156	1.4156e-12	9.2632e-11	7676	2937	12961	15017	1749	1015	814	1183	Icam1	intercellular adhesion molecule 1 [Source:MGI Symbol;Acc:MGI:96392]
ENSMUSG00000046027	1821.78	843.46	1.1106	1.5903e-12	1.0369e-10	1903	1422	1632	1674	762	988	972	1028	Stard5	StAR-related lipid transfer (START) domain containing 5 [Source:MGI Symbol;Acc:MGI:2156765]
ENSMUSG00000020520	453.35	953.75	-1.0729	1.6182e-12	1.0528e-10	401	393	511	360	835	1067	1056	1288	Galnt10	polypeptide N-acetylgalactosaminyltransferase 10 [Source:MGI Symbol;Acc:MGI:1890480]
ENSMUSG00000019850	4364.18	524.87	3.0566	1.6493e-12	1.0707e-10	3795	1767	4970	5580	947	476	370	410	Tnfaip3	tumor necrosis factor, alpha-induced protein 3 [Source:MGI Symbol;Acc:MGI:1196377]
ENSMUSG00000106847	185.04	477.01	-1.3648	1.6809e-12	1.0888e-10	130	140	224	191	370	553	575	639	Peg13	paternally expressed 13 [Source:MGI Symbol;Acc:MGI:2663476]
ENSMUSG00000035673	6730.33	2115.7	1.6699	1.7529e-12	1.133e-10	4748	4705	7726	7712	2673	2101	2208	2211	Sbno2	strawberry notch 2 [Source:MGI Symbol;Acc:MGI:2448490]
ENSMUSG00000034997	348.03	91.84	1.9219	1.8789e-12	1.2102e-10	301	209	401	372	82	118	140	69	Htr2a	5-hydroxytryptamine (serotonin) receptor 2A [Source:MGI Symbol;Acc:MGI:109521]
ENSMUSG00000020546	35.97	124.72	-1.8005	1.8806e-12	1.2102e-10	29	44	30	28	90	163	155	153	Stxbp4	syntaxin binding protein 4 [Source:MGI Symbol;Acc:MGI:1342296]
ENSMUSG00000014030	43.09	2.91	3.9704	1.9971e-12	1.2824e-10	30	27	55	48	6	2	3	1	Pax5	paired box 5 [Source:MGI Symbol;Acc:MGI:97489]
ENSMUSG00000020814	181.59	446.76	-1.3019	2.1194e-12	1.3579e-10	188	180	154	137	374	550	547	524	Mxra7	matrix-remodelling associated 7 [Source:MGI Symbol;Acc:MGI:1914872]
ENSMUSG00000026458	30.21	120.64	-1.9923	2.4058e-12	1.5381e-10	16	36	38	22	102	175	128	134	Ppfia4	protein tyrosine phosphatase, receptor type, f polypeptide (PTPRF), interacting protein (liprin), alpha 4 [Source:MGI Symbol;Acc:MGI:1915757]
ENSMUSG00000028583	7801.46	2274.06	1.7787	2.7171e-12	1.7334e-10	6146	4333	9810	8614	2680	2273	2387	2593	Pdpn	podoplanin [Source:MGI Symbol;Acc:MGI:103098]
ENSMUSG00000066643	154.9	411.69	-1.4126	2.9485e-12	1.877e-10	140	142	148	136	274	500	493	590	Wdr35	WD repeat domain 35 [Source:MGI Symbol;Acc:MGI:1921932]
ENSMUSG00000072949	45.17	208.88	-2.2118	3.0656e-12	1.9474e-10	28	63	37	37	131	225	326	262	Acot1	acyl-CoA thioesterase 1 [Source:MGI Symbol;Acc:MGI:1349396]
ENSMUSG00000032902	3967.05	1639.73	1.2751	3.5863e-12	2.2733e-10	3573	3228	4450	3318	1926	1764	1924	1554	Slc16a1	solute carrier family 16 (monocarboxylic acid transporters), member 1 [Source:MGI Symbol;Acc:MGI:106013]
ENSMUSG00000017057	4157.22	1694.24	1.2953	3.7157e-12	2.3503e-10	4106	2826	4726	3599	1841	1936	1827	1844	Il13ra1	interleukin 13 receptor, alpha 1 [Source:MGI Symbol;Acc:MGI:105052]
ENSMUSG00000038074	352.68	706.23	-1.0011	3.9412e-12	2.4876e-10	283	332	407	276	636	799	870	835	Fkbp14	FK506 binding protein 14 [Source:MGI Symbol;Acc:MGI:2387639]
ENSMUSG00000082676	54.43	5	3.4541	4.3021e-12	2.7096e-10	45	25	61	70	5	2	7	8	Gm11843	predicted gene 11843 [Source:MGI Symbol;Acc:MGI:3651166]
ENSMUSG00000078616	128.49	9.97	3.6921	5.386e-12	3.3779e-10	97	32	186	165	10	11	5	18	Trim30c	tripartite motif-containing 30C [Source:MGI Symbol;Acc:MGI:4821257]
ENSMUSG00000037936	822.39	1999.35	-1.2809	5.7479e-12	3.5972e-10	621	634	1091	702	2087	2110	2400	2212	Scarb1	scavenger receptor class B, member 1 [Source:MGI Symbol;Acc:MGI:893578]
ENSMUSG00000026180	55.92	6.83	3.0681	5.8267e-12	3.6389e-10	62	56	53	32	11	4	7	7	Cxcr2	chemokine (C-X-C motif) receptor 2 [Source:MGI Symbol;Acc:MGI:105303]
ENSMUSG00000097767	27.91	229.7	-3.0508	5.9034e-12	3.6713e-10	39	35	12	13	123	346	336	241	Miat	myocardial infarction associated transcript (non-protein coding) [Source:MGI Symbol;Acc:MGI:2444886]
ENSMUSG00000021384	8.92	56.51	-2.6497	6.4504e-12	4.003e-10	5	11	11	6	70	59	59	58	Susd3	sushi domain containing 3 [Source:MGI Symbol;Acc:MGI:1913579]
ENSMUSG00000078249	167.6	40.59	2.0566	6.5419e-12	4.0513e-10	183	120	189	121	56	35	43	41	Hmga1b	high mobility group AT-hook 1B [Source:MGI Symbol;Acc:MGI:96161]
ENSMUSG00000031596	1353.64	247.61	2.4508	7.0997e-12	4.3876e-10	907	487	1755	1896	226	281	278	315	Slc7a2	solute carrier family 7 (cationic amino acid transporter, y+ system), member 2 [Source:MGI Symbol;Acc:MGI:99828]
ENSMUSG00000020823	1838.76	3880.5	-1.0775	7.2662e-12	4.4811e-10	1711	1456	2018	1560	3349	4539	4016	5388	Sec14l1	SEC14-like lipid binding 1 [Source:MGI Symbol;Acc:MGI:1921386]
ENSMUSG00000022661	1652.39	623.47	1.4054	7.7373e-12	4.7617e-10	1549	1791	1470	1203	467	700	752	878	Cd200	CD200 antigen [Source:MGI Symbol;Acc:MGI:1196990]
ENSMUSG00000039697	1240.93	510.56	1.2816	8.2889e-12	5.0906e-10	1328	900	1087	1199	534	580	566	570	Ncoa7	nuclear receptor coactivator 7 [Source:MGI Symbol;Acc:MGI:2444847]
ENSMUSG00000064193	317.64	154.1	1.0457	8.3267e-12	5.1033e-10	267	255	315	328	154	176	165	186	Gm4735	predicted gene 4735 [Source:MGI Symbol;Acc:MGI:3645521]
ENSMUSG00000025279	230.92	38.32	2.5934	8.4029e-12	5.1393e-10	177	106	258	313	38	23	59	49	Dnase1l3	deoxyribonuclease 1-like 3 [Source:MGI Symbol;Acc:MGI:1314633]
ENSMUSG00000027951	2661.69	1038.25	1.3581	8.7069e-12	5.3143e-10	2219	1637	2975	2980	861	1272	1220	1285	Adar	adenosine deaminase, RNA-specific [Source:MGI Symbol;Acc:MGI:1889575]
ENSMUSG00000051051	8.89	106.37	-3.5761	8.9058e-12	5.4134e-10	2	14	10	7	38	135	190	126	Olfr523	olfactory receptor 523 [Source:MGI Symbol;Acc:MGI:3030357]
ENSMUSG00000031932	4.24	45.55	-3.3919	8.8939e-12	5.4134e-10	2	4	8	2	53	39	50	57	Gpr83	G protein-coupled receptor 83 [Source:MGI Symbol;Acc:MGI:95712]
ENSMUSG00000031639	1084.55	335.26	1.6925	9.1592e-12	5.556e-10	1095	650	1255	983	217	492	415	392	Tlr3	toll-like receptor 3 [Source:MGI Symbol;Acc:MGI:2156367]
ENSMUSG00000035505	451.63	184.93	1.2886	9.1864e-12	5.5611e-10	485	385	435	339	185	198	222	212	Cox18	cytochrome c oxidase assembly protein 18 [Source:MGI Symbol;Acc:MGI:2448532]
ENSMUSG00000073490	2050.31	591.41	1.7936	1.0782e-11	6.5138e-10	1844	1010	2787	1955	514	710	631	780	Ifi207	interferon activated gene 207 [Source:MGI Symbol;Acc:MGI:2138302]
ENSMUSG00000027995	2755.68	484.89	2.5075	1.1067e-11	6.6725e-10	3384	1202	2488	2942	720	426	523	408	Tlr2	toll-like receptor 2 [Source:MGI Symbol;Acc:MGI:1346060]
ENSMUSG00000035376	1140.68	294.52	1.953	1.256e-11	7.5566e-10	1543	1019	741	785	260	338	368	345	Hacd2	3-hydroxyacyl-CoA dehydratase 2 [Source:MGI Symbol;Acc:MGI:1918007]
ENSMUSG00000045795	834.89	405.17	1.0436	1.3454e-11	8.0512e-10	791	601	843	822	399	449	472	472	Whamm	WAS protein homolog associated with actin, golgi membranes and microtubules [Source:MGI Symbol;Acc:MGI:2142282]
ENSMUSG00000022218	1043.99	102.43	3.3512	1.3443e-11	8.0512e-10	1943	619	389	724	151	91	92	105	Tgm1	transglutaminase 1, K polypeptide [Source:MGI Symbol;Acc:MGI:98730]
ENSMUSG00000025225	2760.09	739.58	1.9006	1.3463e-11	8.0512e-10	3094	1772	2459	2713	998	740	613	845	Nfkb2	nuclear factor of kappa light polypeptide gene enhancer in B cells 2, p49/p100 [Source:MGI Symbol;Acc:MGI:1099800]
ENSMUSG00000031880	231.22	65.02	1.8354	1.439e-11	8.5884e-10	190	287	174	189	80	60	73	70	Rrad	Ras-related associated with diabetes [Source:MGI Symbol;Acc:MGI:1930943]
ENSMUSG00000086513	77.86	13.73	2.4837	1.513e-11	9.0115e-10	70	48	93	76	6	26	18	13	Gvin-ps1	GTPase, very large interferon inducible, pseudogene 1 [Source:MGI Symbol;Acc:MGI:1924950]
ENSMUSG00000027737	722.18	105.27	2.7778	1.6528e-11	9.8248e-10	1266	392	451	458	96	127	150	95	Slc7a11	solute carrier family 7 (cationic amino acid transporter, y+ system), member 11 [Source:MGI Symbol;Acc:MGI:1347355]
ENSMUSG00000031842	24.04	84.46	-1.8136	1.702e-11	1.0097e-09	16	29	21	22	78	98	87	112	Pde4c	phosphodiesterase 4C, cAMP specific [Source:MGI Symbol;Acc:MGI:99556]
ENSMUSG00000000244	15.32	61.23	-2.0028	1.8094e-11	1.0712e-09	13	17	15	11	53	77	77	66	Tspan32	tetraspanin 32 [Source:MGI Symbol;Acc:MGI:1350360]
ENSMUSG00000105681	259.51	47.52	2.4517	1.8981e-11	1.1215e-09	125	134	399	318	48	61	46	55	Gm43428	predicted gene 43428 [Source:MGI Symbol;Acc:MGI:5663565]
ENSMUSG00000067297	56.67	9.15	2.6241	1.9072e-11	1.1246e-09	60	31	66	51	7	11	8	15	Ifit1bl2	interferon induced protein with tetratricopeptide repeats 1B like 2 [Source:MGI Symbol;Acc:MGI:2148249]
ENSMUSG00000013236	509.4	1067.73	-1.0684	1.9799e-11	1.1652e-09	436	414	490	526	791	1418	1341	1248	Ptprs	protein tyrosine phosphatase, receptor type, S [Source:MGI Symbol;Acc:MGI:97815]
ENSMUSG00000055541	26.6	134.09	-2.3215	2.0167e-11	1.1845e-09	16	11	43	30	148	161	134	146	Lair1	leukocyte-associated Ig-like receptor 1 [Source:MGI Symbol;Acc:MGI:105492]
ENSMUSG00000036862	402.7	867.87	-1.108	2.1842e-11	1.2803e-09	352	375	460	292	702	1035	1030	1114	Dchs1	dachsous cadherin related 1 [Source:MGI Symbol;Acc:MGI:2685011]
ENSMUSG00000033847	52.11	7.32	2.8206	2.2241e-11	1.3011e-09	51	39	69	33	5	11	5	12	Pla2g4c	phospholipase A2, group IVC (cytosolic, calcium-independent) [Source:MGI Symbol;Acc:MGI:1196403]
ENSMUSG00000103588	34.99	1.34	4.6937	2.2673e-11	1.3238e-09	41	22	30	34	1	1	1	3	Gm18445	predicted gene, 18445 [Source:MGI Symbol;Acc:MGI:5010630]
ENSMUSG00000000142	224.39	572.96	-1.3538	2.2924e-11	1.3358e-09	222	159	229	211	394	765	745	679	Axin2	axin 2 [Source:MGI Symbol;Acc:MGI:1270862]
ENSMUSG00000032363	686.13	192.29	1.8361	2.373e-11	1.3801e-09	397	436	802	914	191	218	192	249	Adamts7	a disintegrin-like and metallopeptidase (reprolysin type) with thrombospondin type 1 motif, 7 [Source:MGI Symbol;Acc:MGI:1347346]
ENSMUSG00000052160	359.34	848.86	-1.239	2.4715e-11	1.4345e-09	306	258	453	310	857	975	1079	839	Pld4	phospholipase D family, member 4 [Source:MGI Symbol;Acc:MGI:2144765]
ENSMUSG00000039883	69.33	353.49	-2.3507	2.5557e-11	1.4805e-09	36	104	60	54	218	432	599	351	Lrrc17	leucine rich repeat containing 17 [Source:MGI Symbol;Acc:MGI:1921761]
ENSMUSG00000025076	968.43	353.2	1.4554	2.7057e-11	1.5644e-09	1011	565	1019	950	346	451	400	367	Casp7	caspase 7 [Source:MGI Symbol;Acc:MGI:109383]
ENSMUSG00000055447	6620.09	2438.28	1.4411	2.7472e-11	1.5852e-09	7888	5028	5984	5109	2590	2586	2665	2889	Cd47	CD47 antigen (Rh-related antigen, integrin-associated signal transducer) [Source:MGI Symbol;Acc:MGI:96617]
ENSMUSG00000091144	152.44	39.54	1.9466	2.8404e-11	1.6358e-09	127	99	162	173	35	50	28	63	Phf11c	PHD finger protein 11C [Source:MGI Symbol;Acc:MGI:3648476]
ENSMUSG00000095332	32.51	116.7	-1.8433	2.8763e-11	1.6533e-09	22	24	34	40	78	170	139	140	Gm9821	predicted gene 9821 [Source:MGI Symbol;Acc:MGI:3704208]
ENSMUSG00000046807	34.5	134.58	-1.961	2.9753e-11	1.7069e-09	17	36	41	34	85	190	179	155	Lrrc75b	leucine rich repeat containing 75B [Source:MGI Symbol;Acc:MGI:2143657]
ENSMUSG00000037541	30.94	139.07	-2.1712	3.0751e-11	1.7607e-09	25	27	25	36	105	199	222	99	Shank2	SH3 and multiple ankyrin repeat domains 2 [Source:MGI Symbol;Acc:MGI:2671987]
ENSMUSG00000005583	182.19	480.07	-1.3978	3.1361e-11	1.7922e-09	154	179	216	121	393	663	617	475	Mef2c	myocyte enhancer factor 2C [Source:MGI Symbol;Acc:MGI:99458]
ENSMUSG00000029084	736.28	271.58	1.4388	3.419e-11	1.9463e-09	779	610	825	478	251	311	367	277	Cd38	CD38 antigen [Source:MGI Symbol;Acc:MGI:107474]
ENSMUSG00000040703	221.9	1058.53	-2.2532	3.5717e-11	2.0276e-09	69	241	240	275	875	1422	1154	1281	Cyp2s1	cytochrome P450, family 2, subfamily s, polypeptide 1 [Source:MGI Symbol;Acc:MGI:1921384]
ENSMUSG00000022941	14.51	85.76	-2.5549	3.5755e-11	2.0276e-09	11	12	22	9	70	95	67	151	Ripply3	ripply transcriptional repressor 3 [Source:MGI Symbol;Acc:MGI:2181192]
ENSMUSG00000025154	73.36	199.56	-1.4368	3.6634e-11	2.0735e-09	49	61	93	69	220	211	208	237	Arhgap19	Rho GTPase activating protein 19 [Source:MGI Symbol;Acc:MGI:1918335]
ENSMUSG00000046688	527.55	183.72	1.5213	4.2129e-11	2.3709e-09	456	322	705	470	148	225	249	200	Tifa	TRAF-interacting protein with forkhead-associated domain [Source:MGI Symbol;Acc:MGI:2182965]
ENSMUSG00000089844	44.26	5.12	3.1856	4.2666e-11	2.3966e-09	35	35	49	44	11	4	3	3	A530032D15Rik	RIKEN cDNA A530032D15Rik gene [Source:MGI Symbol;Acc:MGI:3037746]
ENSMUSG00000021880	6.03	45.28	-2.9163	4.4385e-11	2.4837e-09	6	3	5	8	34	43	69	57	Rnase6	ribonuclease, RNase A family, 6 [Source:MGI Symbol;Acc:MGI:1925666]
ENSMUSG00000090231	586.78	79.13	2.8927	4.558e-11	2.5457e-09	920	189	526	480	104	87	92	60	Cfb	complement factor B [Source:MGI Symbol;Acc:MGI:105975]
ENSMUSG00000023041	2256.48	280.03	3.0121	4.6395e-11	2.5864e-09	1650	1194	2471	3028	552	262	178	171	Krt6b	keratin 6B [Source:MGI Symbol;Acc:MGI:1333768]
ENSMUSG00000024927	3144.08	1466.42	1.1007	5.3492e-11	2.9764e-09	2590	2277	3228	3460	1531	1540	1618	1771	Rela	v-rel reticuloendotheliosis viral oncogene homolog A (avian) [Source:MGI Symbol;Acc:MGI:103290]
ENSMUSG00000039934	1749.34	404.97	2.1104	5.843e-11	3.239e-09	2366	825	1448	1684	302	584	433	501	Gsap	gamma-secretase activating protein [Source:MGI Symbol;Acc:MGI:2442259]
ENSMUSG00000050370	527.18	61.41	3.1065	7.1237e-11	3.9416e-09	746	185	361	606	101	38	58	63	Ch25h	cholesterol 25-hydroxylase [Source:MGI Symbol;Acc:MGI:1333869]
ENSMUSG00000021779	82.01	205.47	-1.3272	7.322e-11	4.0362e-09	68	74	86	73	146	269	285	225	Thrb	thyroid hormone receptor beta [Source:MGI Symbol;Acc:MGI:98743]
ENSMUSG00000052373	21.34	89.25	-2.0622	7.3147e-11	4.0362e-09	15	19	27	18	57	139	119	89	Mpp3	membrane protein, palmitoylated 3 (MAGUK p55 subfamily member 3) [Source:MGI Symbol;Acc:MGI:1328354]
ENSMUSG00000037242	33637.6	8942.2	1.9114	7.5584e-11	4.1588e-09	26840	16016	45246	36837	10943	9069	9086	9855	Clic4	chloride intracellular channel 4 (mitochondrial) [Source:MGI Symbol;Acc:MGI:1352754]
ENSMUSG00000045930	119.6	419.21	-1.8101	7.9887e-11	4.3874e-09	111	134	139	54	337	532	498	509	Clec14a	C-type lectin domain family 14, member a [Source:MGI Symbol;Acc:MGI:1914114]
ENSMUSG00000074695	43.57	0.21	7.3074	8.0202e-11	4.3965e-09	53	24	25	55	0	1	0	0	Il22	interleukin 22 [Source:MGI Symbol;Acc:MGI:1355307]
ENSMUSG00000042182	104.35	36.3	1.519	8.4288e-11	4.6035e-09	99	85	97	100	30	37	41	54	Bend6	BEN domain containing 6 [Source:MGI Symbol;Acc:MGI:2444572]
ENSMUSG00000022537	39.44	160.9	-2.0246	9.822e-11	5.3545e-09	21	36	54	36	90	224	193	224	Tmem44	transmembrane protein 44 [Source:MGI Symbol;Acc:MGI:1924489]
ENSMUSG00000048960	122.48	349.01	-1.509	9.919e-11	5.3953e-09	83	92	163	117	243	482	459	389	Prex2	phosphatidylinositol-3,4,5-trisphosphate-dependent Rac exchange factor 2 [Source:MGI Symbol;Acc:MGI:1923385]
ENSMUSG00000040046	48.78	8.04	2.5944	9.9333e-11	5.3953e-09	35	40	43	61	6	6	9	15	Tph1	tryptophan hydroxylase 1 [Source:MGI Symbol;Acc:MGI:98796]
ENSMUSG00000025929	29.86	0	7.4837	9.9656e-11	5.4029e-09	40	11	24	33	0	0	0	0	Il17a	interleukin 17A [Source:MGI Symbol;Acc:MGI:107364]
ENSMUSG00000072769	32.44	145.4	-2.1651	1.0119e-10	5.4763e-09	34	18	37	30	112	155	123	261	Gm10419	predicted gene 10419 [Source:MGI Symbol;Acc:MGI:3642823]
ENSMUSG00000036218	8.01	67.37	-3.0592	1.0153e-10	5.4847e-09	2	7	10	11	42	52	103	107	Pdzrn4	PDZ domain containing RING finger 4 [Source:MGI Symbol;Acc:MGI:3056996]
ENSMUSG00000020486	101.51	220.65	-1.1186	1.0638e-10	5.7361e-09	72	90	97	114	207	259	257	256	Septin4	septin 4 [Source:MGI Symbol;Acc:MGI:1270156]
ENSMUSG00000005800	29.77	1.88	4.0398	1.0943e-10	5.8895e-09	21	30	37	22	3	2	2	1	Mmp8	matrix metallopeptidase 8 [Source:MGI Symbol;Acc:MGI:1202395]
ENSMUSG00000079457	37.2	4.35	3.1101	1.1278e-10	6.0592e-09	43	33	35	24	5	3	7	4	Gm7609	predicted pseudogene 7609 [Source:MGI Symbol;Acc:MGI:3644536]
ENSMUSG00000026825	414.01	1066.03	-1.3659	1.2365e-10	6.6308e-09	422	410	338	332	736	1363	1471	1234	Dnm1	dynamin 1 [Source:MGI Symbol;Acc:MGI:107384]
ENSMUSG00000030761	436.38	1207.08	-1.4672	1.2488e-10	6.6728e-09	340	277	539	459	1074	1286	1198	1809	Myo7a	myosin VIIA [Source:MGI Symbol;Acc:MGI:104510]
ENSMUSG00000058163	191.36	40.69	2.2311	1.3163e-10	7.0205e-09	142	84	268	219	29	49	44	61	Gm5431	predicted gene 5431 [Source:MGI Symbol;Acc:MGI:3645205]
ENSMUSG00000021591	1238.1	556.18	1.1553	1.4844e-10	7.9031e-09	1274	1081	1164	990	628	605	612	593	Glrx	glutaredoxin [Source:MGI Symbol;Acc:MGI:2135625]
ENSMUSG00000029380	4492.74	51.4	6.4533	1.5077e-10	8.0127e-09	6172	1218	2827	5968	146	30	13	12	Cxcl1	chemokine (C-X-C motif) ligand 1 [Source:MGI Symbol;Acc:MGI:108068]
ENSMUSG00000072109	85.61	15.11	2.5269	1.5623e-10	8.2878e-09	105	63	86	57	25	13	13	13	A530040E14Rik	RIKEN cDNA A530040E14 gene [Source:MGI Symbol;Acc:MGI:3612703]
ENSMUSG00000030208	9878.12	3781.51	1.3852	1.6825e-10	8.9096e-09	11349	9131	8631	6671	3158	4490	5026	4212	Emp1	epithelial membrane protein 1 [Source:MGI Symbol;Acc:MGI:107941]
ENSMUSG00000040528	184.04	48.26	1.9356	1.7988e-10	9.5085e-09	224	124	206	117	57	59	48	47	Milr1	mast cell immunoglobulin like receptor 1 [Source:MGI Symbol;Acc:MGI:2685731]
ENSMUSG00000020707	379.34	159.84	1.2447	1.8235e-10	9.6048e-09	386	303	334	358	131	181	170	232	Rnf135	ring finger protein 135 [Source:MGI Symbol;Acc:MGI:1919206]
ENSMUSG00000031762	263.41	48.3	2.4571	1.8367e-10	9.6574e-09	286	182	276	218	81	30	33	60	Mt2	metallothionein 2 [Source:MGI Symbol;Acc:MGI:97172]
ENSMUSG00000021846	440.5	886.63	-1.0095	1.8823e-10	9.8794e-09	365	402	502	351	675	1118	1136	1049	Peli2	pellino 2 [Source:MGI Symbol;Acc:MGI:1891445]
ENSMUSG00000057440	221.39	495.16	-1.162	1.9021e-10	9.9657e-09	157	211	212	233	364	663	635	564	Mpp7	membrane protein, palmitoylated 7 (MAGUK p55 subfamily member 7) [Source:MGI Symbol;Acc:MGI:1922989]
ENSMUSG00000026166	2911.71	10.38	8.138	1.9365e-10	1.0128e-08	7030	62	418	2582	21	12	3	7	Ccl20	chemokine (C-C motif) ligand 20 [Source:MGI Symbol;Acc:MGI:1329031]
ENSMUSG00000006386	345.1	814.67	-1.24	2.0799e-10	1.0859e-08	318	363	356	224	654	1027	1021	944	Tek	TEK receptor tyrosine kinase [Source:MGI Symbol;Acc:MGI:98664]
ENSMUSG00000040829	258.48	97.43	1.4061	2.1791e-10	1.1337e-08	259	230	198	251	87	97	106	143	Zmynd15	zinc finger, MYND-type containing 15 [Source:MGI Symbol;Acc:MGI:3603821]
ENSMUSG00000022901	357.94	110.15	1.7043	2.1922e-10	1.1385e-08	349	230	412	324	140	133	123	83	Cd86	CD86 antigen [Source:MGI Symbol;Acc:MGI:101773]
ENSMUSG00000024957	12.58	94.77	-2.9065	2.2037e-10	1.1425e-08	4	10	15	18	40	121	159	114	Kcnk4	potassium channel, subfamily K, member 4 [Source:MGI Symbol;Acc:MGI:1298234]
ENSMUSG00000063229	21137.2	8660.85	1.2873	2.4458e-10	1.2635e-08	17240	16602	23551	20420	10961	8606	8485	9573	Ldha	lactate dehydrogenase A [Source:MGI Symbol;Acc:MGI:96759]
ENSMUSG00000107476	85.57	208.41	-1.2865	2.5086e-10	1.2937e-08	77	81	86	69	168	251	211	302	Zfp862-ps	zinc finger protein 862, pseudogene [Source:MGI Symbol;Acc:MGI:1889827]
ENSMUSG00000053318	182.76	33.78	2.4466	2.6323e-10	1.3551e-08	116	110	304	156	49	32	23	41	Slamf8	SLAM family member 8 [Source:MGI Symbol;Acc:MGI:1921998]
ENSMUSG00000043366	21.06	80.76	-1.931	2.6681e-10	1.3712e-08	18	10	27	23	80	91	78	108	Olfr78	olfactory receptor 78 [Source:MGI Symbol;Acc:MGI:2157548]
ENSMUSG00000029919	550.04	3266.8	-2.5703	2.7437e-10	1.4076e-08	286	799	604	338	1201	4983	4631	4208	Hpgds	hematopoietic prostaglandin D synthase [Source:MGI Symbol;Acc:MGI:1859384]
ENSMUSG00000045502	502.8	48.42	3.3846	2.7501e-10	1.4085e-08	383	165	653	669	102	30	39	28	Hcar2	hydroxycarboxylic acid receptor 2 [Source:MGI Symbol;Acc:MGI:1933383]
ENSMUSG00000037577	58.78	13.5	2.1183	2.763e-10	1.4126e-08	59	65	47	42	12	13	17	18	Ephx3	epoxide hydrolase 3 [Source:MGI Symbol;Acc:MGI:1919182]
ENSMUSG00000057135	77.46	20.73	1.9093	2.7906e-10	1.4243e-08	82	47	89	66	23	23	22	23	Scimp	SLP adaptor and CSK interacting membrane protein [Source:MGI Symbol;Acc:MGI:3610314]
ENSMUSG00000070390	8.04	56.67	-2.8014	3.1449e-10	1.6023e-08	4	2	9	15	62	64	66	57	Nlrp1b	NLR family, pyrin domain containing 1B [Source:MGI Symbol;Acc:MGI:3582959]
ENSMUSG00000099974	219.02	68.64	1.6831	3.2063e-10	1.6308e-08	191	154	259	203	95	70	58	73	Bcl2a1d	B cell leukemia/lymphoma 2 related protein A1d [Source:MGI Symbol;Acc:MGI:1278325]
ENSMUSG00000032606	122.68	271.56	-1.148	3.2651e-10	1.6579e-08	89	136	110	114	224	356	320	314	Nicn1	nicolin 1 [Source:MGI Symbol;Acc:MGI:1913507]
ENSMUSG00000053199	86.3	305.21	-1.8231	3.3419e-10	1.694e-08	92	66	112	47	206	401	437	333	Arhgap20	Rho GTPase activating protein 20 [Source:MGI Symbol;Acc:MGI:2445175]
ENSMUSG00000026466	3216.89	1382.38	1.2189	3.3581e-10	1.6993e-08	2770	2091	3935	3078	1488	1459	1520	1611	Tor1aip1	torsin A interacting protein 1 [Source:MGI Symbol;Acc:MGI:3582693]
ENSMUSG00000070524	54.96	4.73	3.5762	3.6759e-10	1.8537e-08	57	16	60	69	8	5	4	3	Fcrlb	Fc receptor-like B [Source:MGI Symbol;Acc:MGI:3576487]
ENSMUSG00000057191	190.77	67.81	1.4992	3.6931e-10	1.8593e-08	169	153	226	154	82	81	79	54	AB124611	cDNA sequence AB124611 [Source:MGI Symbol;Acc:MGI:3043001]
ENSMUSG00000070501	48.93	7	2.8341	3.7846e-10	1.9021e-08	48	30	59	43	10	2	10	8	Ifi214	interferon activated gene 214 [Source:MGI Symbol;Acc:MGI:3584522]
ENSMUSG00000066842	41.96	137.13	-1.7109	4.1795e-10	2.0934e-08	42	35	51	26	93	203	168	155	Hmcn1	hemicentin 1 [Source:MGI Symbol;Acc:MGI:2685047]
ENSMUSG00000020701	239.29	46.59	2.3676	4.1953e-10	2.0978e-08	151	122	282	334	63	31	58	49	Tmem132e	transmembrane protein 132E [Source:MGI Symbol;Acc:MGI:2685490]
ENSMUSG00000016262	166.74	576.5	-1.7883	4.245e-10	2.1191e-08	142	99	239	139	526	641	477	916	Sertad4	SERTA domain containing 4 [Source:MGI Symbol;Acc:MGI:2443496]
ENSMUSG00000030223	32.86	95.02	-1.541	4.2958e-10	2.1408e-08	36	32	27	24	85	124	109	105	Ptpro	protein tyrosine phosphatase, receptor type, O [Source:MGI Symbol;Acc:MGI:1097152]
ENSMUSG00000055489	41.89	231.21	-2.4604	4.3466e-10	2.1625e-08	15	48	63	31	127	401	272	253	Ano5	anoctamin 5 [Source:MGI Symbol;Acc:MGI:3576659]
ENSMUSG00000078486	189.75	77.99	1.2804	4.5447e-10	2.2535e-08	148	153	199	198	63	105	73	108	Perm1	PPARGC1 and ESRR induced regulator, muscle 1 [Source:MGI Symbol;Acc:MGI:1921433]
ENSMUSG00000024539	1401.08	494.1	1.5051	4.8388e-10	2.39e-08	990	1043	1583	1561	643	448	537	513	Ptpn2	protein tyrosine phosphatase, non-receptor type 2 [Source:MGI Symbol;Acc:MGI:97806]
ENSMUSG00000024810	838.15	144.62	2.5356	4.8443e-10	2.39e-08	690	236	1429	788	143	139	183	174	Il33	interleukin 33 [Source:MGI Symbol;Acc:MGI:1924375]
ENSMUSG00000005043	218.91	576.24	-1.3953	4.8635e-10	2.395e-08	155	154	280	223	429	711	614	833	Sgsh	N-sulfoglucosamine sulfohydrolase (sulfamidase) [Source:MGI Symbol;Acc:MGI:1350341]
ENSMUSG00000091694	36.75	2.13	4.0481	5.0803e-10	2.494e-08	39	46	32	16	0	2	4	4	Apol11b	apolipoprotein L 11b [Source:MGI Symbol;Acc:MGI:3036248]
ENSMUSG00000040722	2193.37	773.34	1.5036	5.3032e-10	2.5991e-08	2210	2632	1557	1524	651	989	901	912	Scamp5	secretory carrier membrane protein 5 [Source:MGI Symbol;Acc:MGI:1928948]
ENSMUSG00000052534	2107.83	5820.86	-1.4653	5.5234e-10	2.6981e-08	1373	1348	2913	2220	4762	7605	7349	6318	Pbx1	pre B cell leukemia homeobox 1 [Source:MGI Symbol;Acc:MGI:97495]
ENSMUSG00000086515	52.11	3.36	3.9471	5.515e-10	2.6981e-08	92	24	29	40	3	6	2	4	Erich2os	glutamate rich 2, opposite strand [Source:MGI Symbol;Acc:MGI:3826593]
ENSMUSG00000038276	65.63	11.44	2.5137	5.84e-10	2.848e-08	84	57	34	60	10	15	15	11	Asic3	acid-sensing (proton-gated) ion channel 3 [Source:MGI Symbol;Acc:MGI:2159339]
ENSMUSG00000027669	1367.8	439.36	1.6392	6.7774e-10	3.2998e-08	1063	725	1857	1437	493	451	457	525	Gnb4	guanine nucleotide binding protein (G protein), beta 4 [Source:MGI Symbol;Acc:MGI:104581]
ENSMUSG00000020620	10.4	50.94	-2.2984	6.8798e-10	3.3441e-08	8	9	8	13	38	73	71	47	Abca8b	ATP-binding cassette, sub-family A (ABC1), member 8b [Source:MGI Symbol;Acc:MGI:1351668]
ENSMUSG00000021226	105.94	302.71	-1.5099	6.9213e-10	3.3587e-08	67	76	162	91	288	360	333	361	Acot2	acyl-CoA thioesterase 2 [Source:MGI Symbol;Acc:MGI:2159605]
ENSMUSG00000050377	43.18	158.69	-1.8739	6.9879e-10	3.3855e-08	32	29	66	34	98	201	189	230	Il31ra	interleukin 31 receptor A [Source:MGI Symbol;Acc:MGI:2180511]
ENSMUSG00000042807	26.42	106.07	-1.9963	7.0328e-10	3.4017e-08	18	17	44	20	80	126	158	112	Hecw2	HECT, C2 and WW domain containing E3 ubiquitin protein ligase 2 [Source:MGI Symbol;Acc:MGI:2685817]
ENSMUSG00000045441	8.59	55.67	-2.6896	7.1026e-10	3.4299e-08	5	5	11	11	28	85	78	63	Gprin3	GPRIN family member 3 [Source:MGI Symbol;Acc:MGI:1924785]
ENSMUSG00000035004	566.35	121.72	2.2197	7.6409e-10	3.6838e-08	426	204	848	638	137	149	117	131	Igsf6	immunoglobulin superfamily, member 6 [Source:MGI Symbol;Acc:MGI:1891393]
ENSMUSG00000037922	4.37	37.33	-3.1002	7.959e-10	3.8309e-08	6	2	6	2	27	51	55	35	Bank1	B cell scaffold protein with ankyrin repeats 1 [Source:MGI Symbol;Acc:MGI:2442120]
ENSMUSG00000015653	3600.94	1698.96	1.0836	8.2292e-10	3.9545e-08	3665	2860	3114	3466	1567	2247	2123	1615	Steap2	six transmembrane epithelial antigen of prostate 2 [Source:MGI Symbol;Acc:MGI:1921301]
ENSMUSG00000041272	5.99	55.39	-3.1749	8.9297e-10	4.2773e-08	1	2	12	8	44	74	46	84	Tox	thymocyte selection-associated high mobility group box [Source:MGI Symbol;Acc:MGI:2181659]
ENSMUSG00000074575	11	95.56	-3.124	8.9997e-10	4.2969e-08	5	23	8	4	55	103	113	162	Kcng1	potassium voltage-gated channel, subfamily G, member 1 [Source:MGI Symbol;Acc:MGI:3616086]
ENSMUSG00000041633	70.62	206.31	-1.5491	8.9936e-10	4.2969e-08	77	62	81	38	163	261	252	248	Kctd12b	potassium channel tetramerisation domain containing 12b [Source:MGI Symbol;Acc:MGI:2444667]
ENSMUSG00000036523	162.76	966.72	-2.5696	9.247e-10	4.4079e-08	87	165	258	99	334	1468	1539	1111	Greb1	gene regulated by estrogen in breast cancer protein [Source:MGI Symbol;Acc:MGI:2149712]
ENSMUSG00000063193	29.56	116.97	-1.9902	9.5204e-10	4.5309e-08	39	26	30	12	111	152	139	117	Cd300lb	CD300 molecule like family member B [Source:MGI Symbol;Acc:MGI:2685099]
ENSMUSG00000015944	246.5	661.04	-1.4227	9.6031e-10	4.5629e-08	149	255	293	215	456	882	710	931	Castor2	cytosolic arginine sensor for mTORC1 subunit 2 [Source:MGI Symbol;Acc:MGI:1933384]
ENSMUSG00000047414	230.36	744.94	-1.6946	1.0077e-09	4.765e-08	231	258	211	137	443	1035	1011	889	Flrt2	fibronectin leucine rich transmembrane protein 2 [Source:MGI Symbol;Acc:MGI:3603594]
ENSMUSG00000038910	306.16	648.56	-1.0835	1.0077e-09	4.765e-08	283	260	352	229	495	791	857	766	Plcl2	phospholipase C-like 2 [Source:MGI Symbol;Acc:MGI:1352756]
ENSMUSG00000023045	81.16	24.79	1.7291	1.0232e-09	4.8307e-08	67	71	74	85	34	25	27	21	Soat2	sterol O-acyltransferase 2 [Source:MGI Symbol;Acc:MGI:1332226]
ENSMUSG00000035275	159.39	381.3	-1.2613	1.1017e-09	5.1929e-08	150	156	147	128	253	487	517	464	Raver2	ribonucleoprotein, PTB-binding 2 [Source:MGI Symbol;Acc:MGI:2443623]
ENSMUSG00000026725	44.55	7.95	2.4698	1.1494e-09	5.4007e-08	28	48	34	53	5	12	11	8	Tnn	tenascin N [Source:MGI Symbol;Acc:MGI:2665790]
ENSMUSG00000025489	48.91	11.89	2.0532	1.1552e-09	5.4194e-08	35	56	44	44	14	14	12	12	Ifitm5	interferon induced transmembrane protein 5 [Source:MGI Symbol;Acc:MGI:1934923]
ENSMUSG00000000409	161.83	58.73	1.4672	1.2119e-09	5.6765e-08	160	158	159	113	67	52	68	70	Lck	lymphocyte protein tyrosine kinase [Source:MGI Symbol;Acc:MGI:96756]
ENSMUSG00000020400	5284.95	1577.39	1.7447	1.2494e-09	5.8427e-08	3995	3075	6594	5923	2128	1389	1514	1782	Tnip1	TNFAIP3 interacting protein 1 [Source:MGI Symbol;Acc:MGI:1926194]
ENSMUSG00000020010	164.55	8.53	4.2678	1.2594e-09	5.8802e-08	384	40	89	63	7	6	7	18	Vnn3	vanin 3 [Source:MGI Symbol;Acc:MGI:1347055]
ENSMUSG00000069792	1075.25	363.11	1.5661	1.3601e-09	6.3403e-08	1371	937	899	673	360	388	431	426	Wfdc17	WAP four-disulfide core domain 17 [Source:MGI Symbol;Acc:MGI:3649773]
ENSMUSG00000030087	77.7	229.98	-1.5671	1.5025e-09	6.9934e-08	67	94	81	42	186	255	279	308	Klf15	Kruppel-like factor 15 [Source:MGI Symbol;Acc:MGI:1929988]
ENSMUSG00000028645	7978.66	2458.32	1.6987	1.5233e-09	7.079e-08	6259	4483	8504	10182	3182	2317	2486	2673	Slc2a1	solute carrier family 2 (facilitated glucose transporter), member 1 [Source:MGI Symbol;Acc:MGI:95755]
ENSMUSG00000079563	47.58	5.38	3.1721	1.6083e-09	7.4622e-08	54	57	42	19	8	4	4	7	Pglyrp2	peptidoglycan recognition protein 2 [Source:MGI Symbol;Acc:MGI:1928099]
ENSMUSG00000037161	92.75	16.96	2.4674	1.7015e-09	7.8824e-08	65	48	122	110	24	18	9	22	Mgarp	mitochondria localized glutamic acid rich protein [Source:MGI Symbol;Acc:MGI:1914999]
ENSMUSG00000030711	98.79	340.43	-1.7868	1.7937e-09	8.2834e-08	86	126	94	54	225	369	432	509	Sult1a1	sulfotransferase family 1A, phenol-preferring, member 1 [Source:MGI Symbol;Acc:MGI:102896]
ENSMUSG00000031099	61.61	187.02	-1.5965	1.8527e-09	8.5426e-08	46	43	87	53	193	181	180	270	Smarca1	SWI/SNF related, matrix associated, actin dependent regulator of chromatin, subfamily a, member 1 [Source:MGI Symbol;Acc:MGI:1935127]
ENSMUSG00000027692	105.69	247.91	-1.2265	1.8941e-09	8.7062e-08	76	76	137	103	220	316	313	255	Tnik	TRAF2 and NCK interacting kinase [Source:MGI Symbol;Acc:MGI:1916264]
ENSMUSG00000061740	227.58	529.86	-1.2206	1.9499e-09	8.9352e-08	201	227	236	169	357	636	702	694	Cyp2d22	cytochrome P450, family 2, subfamily d, polypeptide 22 [Source:MGI Symbol;Acc:MGI:1929474]
ENSMUSG00000021913	135.71	339.77	-1.3239	1.9826e-09	9.0708e-08	102	127	166	106	229	423	396	484	Ogdhl	oxoglutarate dehydrogenase-like [Source:MGI Symbol;Acc:MGI:3616088]
ENSMUSG00000038467	9977.62	4843.1	1.0429	2.0571e-09	9.3974e-08	9102	10144	9262	7883	5480	5072	5555	5116	Chmp4b	charged multivesicular body protein 4B [Source:MGI Symbol;Acc:MGI:1922858]
ENSMUSG00000042684	47.92	173.73	-1.8615	2.159e-09	9.8357e-08	65	22	49	38	162	196	231	182	Npl	N-acetylneuraminate pyruvate lyase [Source:MGI Symbol;Acc:MGI:1921341]
ENSMUSG00000101940	10.68	55.45	-2.3845	2.1597e-09	9.8357e-08	7	15	9	8	31	77	79	65	Akp-ps1	alkaline phosphatase pseudogene 1 [Source:MGI Symbol;Acc:MGI:87981]
ENSMUSG00000032315	5.14	40.02	-2.9545	2.2795e-09	1.0349e-07	2	9	6	2	32	47	38	62	Cyp1a1	cytochrome P450, family 1, subfamily a, polypeptide 1 [Source:MGI Symbol;Acc:MGI:88588]
ENSMUSG00000051243	288.28	1430.9	-2.3119	2.42e-09	1.097e-07	408	96	289	253	1046	1559	1510	2309	Islr2	immunoglobulin superfamily containing leucine-rich repeat 2 [Source:MGI Symbol;Acc:MGI:2444277]
ENSMUSG00000096775	29.85	4.34	2.7957	2.5077e-09	1.1316e-07	24	27	24	34	5	4	6	4	Gm5796	predicted gene 5796 [Source:MGI Symbol;Acc:MGI:3779522]
ENSMUSG00000103439	46.92	4.04	3.4894	2.5448e-09	1.1466e-07	63	23	32	51	0	6	8	5	Gm7019	predicted pseudogene 7019 [Source:MGI Symbol;Acc:MGI:3645821]
ENSMUSG00000029771	721.78	273.89	1.3985	2.6351e-09	1.1855e-07	816	428	775	618	284	320	327	277	Irf5	interferon regulatory factor 5 [Source:MGI Symbol;Acc:MGI:1350924]
ENSMUSG00000045664	987.65	447.84	1.1408	2.6768e-09	1.2024e-07	1008	957	902	725	418	469	483	616	Cdc42ep2	CDC42 effector protein (Rho GTPase binding) 2 [Source:MGI Symbol;Acc:MGI:1929744]
ENSMUSG00000056130	12.81	52.47	-2.0395	2.6956e-09	1.2072e-07	11	12	14	10	35	79	59	64	Ticam2	toll-like receptor adaptor molecule 2 [Source:MGI Symbol;Acc:MGI:3040056]
ENSMUSG00000025656	55.59	153.06	-1.4678	2.7165e-09	1.2147e-07	52	60	46	44	105	196	218	171	Arhgef9	CDC42 guanine nucleotide exchange factor (GEF) 9 [Source:MGI Symbol;Acc:MGI:2442233]
ENSMUSG00000020846	223.74	538.13	-1.2657	2.766e-09	1.235e-07	177	253	233	157	553	539	728	553	Rflnb	refilin B [Source:MGI Symbol;Acc:MGI:1923816]
ENSMUSG00000026880	4883.18	1700.98	1.5216	2.7942e-09	1.2457e-07	5726	2709	5175	4211	1922	1785	1809	1938	Stom	stomatin [Source:MGI Symbol;Acc:MGI:95403]
ENSMUSG00000005667	1632.49	312.98	2.3839	2.9211e-09	1.3003e-07	2008	2060	937	833	470	319	273	278	Mthfd2	methylenetetrahydrofolate dehydrogenase (NAD+ dependent), methenyltetrahydrofolate cyclohydrolase [Source:MGI Symbol;Acc:MGI:1338850]
ENSMUSG00000032369	4124.18	638.45	2.6917	2.9423e-09	1.3078e-07	6725	1091	3521	3496	836	666	646	619	Plscr1	phospholipid scramblase 1 [Source:MGI Symbol;Acc:MGI:893575]
ENSMUSG00000028944	588.71	1183	-1.0065	3.0249e-09	1.3405e-07	393	630	658	489	1021	1411	1378	1463	Prkag2	protein kinase, AMP-activated, gamma 2 non-catalytic subunit [Source:MGI Symbol;Acc:MGI:1336153]
ENSMUSG00000028031	65.29	238.29	-1.8682	3.1917e-09	1.4122e-07	70	68	72	28	283	262	281	215	Dkk2	dickkopf WNT signaling pathway inhibitor 2 [Source:MGI Symbol;Acc:MGI:1890663]
ENSMUSG00000041608	1846.15	549.54	1.7491	3.2036e-09	1.4154e-07	1337	1612	1858	1983	738	591	720	329	Entpd3	ectonucleoside triphosphate diphosphohydrolase 3 [Source:MGI Symbol;Acc:MGI:1321386]
ENSMUSG00000024168	139.41	342.51	-1.2979	3.3223e-09	1.4657e-07	133	154	136	85	335	395	429	357	Tmem204	transmembrane protein 204 [Source:MGI Symbol;Acc:MGI:3039635]
ENSMUSG00000037235	1449.24	2939.54	-1.0203	3.3639e-09	1.4774e-07	1023	1509	1597	1207	2260	3761	3323	3838	Mxd4	Max dimerization protein 4 [Source:MGI Symbol;Acc:MGI:104991]
ENSMUSG00000037553	1607.48	757.74	1.0861	3.376e-09	1.4805e-07	1382	1280	1618	1615	899	759	750	900	Zdhhc18	zinc finger, DHHC domain containing 18 [Source:MGI Symbol;Acc:MGI:3527792]
ENSMUSG00000071068	77.62	21.11	1.8862	3.5592e-09	1.5563e-07	60	54	106	68	23	33	18	19	Treml2	triggering receptor expressed on myeloid cells-like 2 [Source:MGI Symbol;Acc:MGI:2147038]
ENSMUSG00000034266	334.64	84.2	1.9977	3.7398e-09	1.6304e-07	237	286	400	314	134	70	54	100	Batf	basic leucine zipper transcription factor, ATF-like [Source:MGI Symbol;Acc:MGI:1859147]
ENSMUSG00000041736	3374.59	1438.19	1.2308	3.8307e-09	1.6651e-07	3119	3620	3235	2332	1675	1463	1535	1615	Tspo	translocator protein [Source:MGI Symbol;Acc:MGI:88222]
ENSMUSG00000027613	4927.9	1877.03	1.3928	3.8563e-09	1.6738e-07	5579	4071	4244	3977	2377	1963	1988	1829	Eif6	eukaryotic translation initiation factor 6 [Source:MGI Symbol;Acc:MGI:1196288]
ENSMUSG00000022548	330.53	89.58	1.8836	3.9065e-09	1.6931e-07	332	364	359	151	84	90	84	139	Apod	apolipoprotein D [Source:MGI Symbol;Acc:MGI:88056]
ENSMUSG00000060882	4.85	37.88	-2.954	3.956e-09	1.7103e-07	4	3	7	4	36	44	62	26	Kcnd2	potassium voltage-gated channel, Shal-related family, member 2 [Source:MGI Symbol;Acc:MGI:102663]
ENSMUSG00000048078	89.58	352.61	-1.9783	3.9577e-09	1.7103e-07	83	95	101	49	160	485	462	505	Tenm4	teneurin transmembrane protein 4 [Source:MGI Symbol;Acc:MGI:2447063]
ENSMUSG00000020415	789.51	364.64	1.1132	4.208e-09	1.8158e-07	720	873	640	636	298	482	446	405	Pttg1	pituitary tumor-transforming gene 1 [Source:MGI Symbol;Acc:MGI:1353578]
ENSMUSG00000020733	2592.2	1284.27	1.0131	4.2908e-09	1.8489e-07	2779	2356	2252	2023	1230	1582	1460	1421	Slc9a3r1	solute carrier family 9 (sodium/hydrogen exchanger), member 3 regulator 1 [Source:MGI Symbol;Acc:MGI:1349482]
ENSMUSG00000029925	83.92	216.97	-1.3683	4.3202e-09	1.8588e-07	68	49	98	95	188	254	298	227	Tbxas1	thromboxane A synthase 1, platelet [Source:MGI Symbol;Acc:MGI:98497]
ENSMUSG00000002799	111.73	263.9	-1.2379	4.339e-09	1.8642e-07	98	97	144	73	257	338	297	277	Jag2	jagged 2 [Source:MGI Symbol;Acc:MGI:1098270]
ENSMUSG00000049336	1.93	31.93	-4.066	4.56e-09	1.9535e-07	2	1	1	3	15	50	48	33	Tenm2	teneurin transmembrane protein 2 [Source:MGI Symbol;Acc:MGI:1345184]
ENSMUSG00000026354	8.8	53.22	-2.6059	4.6913e-09	2.0039e-07	8	9	7	8	34	84	86	37	Lct	lactase [Source:MGI Symbol;Acc:MGI:104576]
ENSMUSG00000000247	25.29	1.13	4.4933	4.8903e-09	2.0859e-07	18	16	34	26	1	0	2	2	Lhx2	LIM homeobox protein 2 [Source:MGI Symbol;Acc:MGI:96785]
ENSMUSG00000079491	444.01	179.46	1.3083	4.9833e-09	2.1225e-07	304	300	563	481	171	192	192	240	H2-T10	histocompatibility 2, T region locus 10 [Source:MGI Symbol;Acc:MGI:95942]
ENSMUSG00000022389	687.81	1530.2	-1.1536	5.1016e-09	2.1698e-07	469	703	809	558	1093	1930	1821	2040	Tef	thyrotroph embryonic factor [Source:MGI Symbol;Acc:MGI:98663]
ENSMUSG00000029868	3618.7	1267.97	1.5134	5.1971e-09	2.2072e-07	2999	2849	3666	3771	1711	1447	903	1422	Trpv6	transient receptor potential cation channel, subfamily V, member 6 [Source:MGI Symbol;Acc:MGI:1927259]
ENSMUSG00000037762	20.51	84.16	-2.0481	5.3053e-09	2.25e-07	26	21	18	9	60	123	86	110	Slc16a9	solute carrier family 16 (monocarboxylic acid transporters), member 9 [Source:MGI Symbol;Acc:MGI:1914109]
ENSMUSG00000020089	1987.88	704.76	1.4965	5.5446e-09	2.3447e-07	2271	1948	1632	1338	862	732	810	667	Ppa1	pyrophosphatase (inorganic) 1 [Source:MGI Symbol;Acc:MGI:97831]
ENSMUSG00000046718	16664.5	5728.26	1.5407	5.5591e-09	2.3475e-07	14192	21418	11950	12854	6775	5610	7164	5468	Bst2	bone marrow stromal cell antigen 2 [Source:MGI Symbol;Acc:MGI:1916800]
ENSMUSG00000037820	42403.4	13267.9	1.6763	5.947e-09	2.5078e-07	38563	25870	42477	48652	18917	13076	14030	11052	Tgm2	transglutaminase 2, C polypeptide [Source:MGI Symbol;Acc:MGI:98731]
ENSMUSG00000039713	327.76	676.76	-1.0454	6.1953e-09	2.6087e-07	284	234	391	299	601	821	920	671	Plekhg5	pleckstrin homology domain containing, family G (with RhoGef domain) member 5 [Source:MGI Symbol;Acc:MGI:2652860]
ENSMUSG00000030717	6166.05	1433.52	2.1047	6.3657e-09	2.6767e-07	7572	7889	3517	3068	1192	1607	1419	2180	Nupr1	nuclear protein transcription regulator 1 [Source:MGI Symbol;Acc:MGI:1891834]
ENSMUSG00000055978	5304.52	1435.88	1.8857	6.6733e-09	2.802e-07	3281	6007	4199	5930	2207	1359	1136	1429	Fut2	fucosyltransferase 2 [Source:MGI Symbol;Acc:MGI:109374]
ENSMUSG00000056071	1974.41	31.64	5.967	6.9035e-09	2.8864e-07	4895	1045	396	468	70	12	29	18	S100a9	S100 calcium binding protein A9 (calgranulin B) [Source:MGI Symbol;Acc:MGI:1338947]
ENSMUSG00000000184	700.25	318.27	1.1365	6.8994e-09	2.8864e-07	689	594	774	507	251	389	334	451	Ccnd2	cyclin D2 [Source:MGI Symbol;Acc:MGI:88314]
ENSMUSG00000020053	472.8	954.61	-1.0145	6.9578e-09	2.905e-07	441	457	470	359	773	1108	1361	1027	Igf1	insulin-like growth factor 1 [Source:MGI Symbol;Acc:MGI:96432]
ENSMUSG00000048216	40.27	7.86	2.406	7.0437e-09	2.9367e-07	33	36	44	35	14	6	7	6	Gpr85	G protein-coupled receptor 85 [Source:MGI Symbol;Acc:MGI:1927851]
ENSMUSG00000032537	25.46	86.93	-1.7818	7.3519e-09	3.0609e-07	24	32	17	19	67	115	123	85	Ephb1	Eph receptor B1 [Source:MGI Symbol;Acc:MGI:1096337]
ENSMUSG00000021702	1710.1	751.65	1.1871	7.6545e-09	3.178e-07	1406	1329	1919	1642	956	819	762	729	Thbs4	thrombospondin 4 [Source:MGI Symbol;Acc:MGI:1101779]
ENSMUSG00000019966	213.02	573.35	-1.4292	7.8353e-09	3.2485e-07	181	263	214	120	458	709	665	734	Kitl	kit ligand [Source:MGI Symbol;Acc:MGI:96974]
ENSMUSG00000026357	5.24	32.61	-2.6464	7.9564e-09	3.294e-07	4	6	3	6	33	38	30	43	Rgs18	regulator of G-protein signaling 18 [Source:MGI Symbol;Acc:MGI:1927498]
ENSMUSG00000001700	1443.2	677.12	1.0927	8.0878e-09	3.3438e-07	1384	1157	1360	1369	800	787	755	618	Gramd3	GRAM domain containing 3 [Source:MGI Symbol;Acc:MGI:1914815]
ENSMUSG00000032788	714.68	1610.31	-1.1726	8.4255e-09	3.4737e-07	663	675	555	705	1335	2517	1712	1642	Pdxk	pyridoxal (pyridoxine, vitamin B6) kinase [Source:MGI Symbol;Acc:MGI:1351869]
ENSMUSG00000078485	1089.78	405	1.4286	8.6847e-09	3.5706e-07	633	849	1231	1326	411	555	348	476	Plekhn1	pleckstrin homology domain containing, family N member 1 [Source:MGI Symbol;Acc:MGI:2387630]
ENSMUSG00000028599	6407.64	1469.9	2.1242	8.9462e-09	3.673e-07	4029	2319	9579	8090	1605	1565	1391	1895	Tnfrsf1b	tumor necrosis factor receptor superfamily, member 1b [Source:MGI Symbol;Acc:MGI:1314883]
ENSMUSG00000034614	426.07	1158.73	-1.4435	9.2368e-09	3.7818e-07	367	295	498	410	686	1457	1276	1831	Pik3ip1	phosphoinositide-3-kinase interacting protein 1 [Source:MGI Symbol;Acc:MGI:1917016]
ENSMUSG00000036040	48.78	121.99	-1.3165	9.3863e-09	3.8377e-07	36	37	66	42	108	141	162	132	Adamtsl2	ADAMTS-like 2 [Source:MGI Symbol;Acc:MGI:1925044]
ENSMUSG00000024661	118992	37752.8	1.6562	9.5167e-09	3.8857e-07	156889	71968	114107	88314	45412	35876	39672	43652	Fth1	ferritin heavy polypeptide 1 [Source:MGI Symbol;Acc:MGI:95588]
ENSMUSG00000052353	94.47	17.72	2.44	9.6447e-09	3.9223e-07	98	57	90	100	33	12	17	12	Cemip	cell migration inducing protein, hyaluronan binding [Source:MGI Symbol;Acc:MGI:2443629]
ENSMUSG00000047098	1342.68	589.43	1.1879	9.646e-09	3.9223e-07	1119	942	1351	1520	550	681	534	850	Rnf31	ring finger protein 31 [Source:MGI Symbol;Acc:MGI:1934704]
ENSMUSG00000002699	414.63	180.46	1.2034	9.6309e-09	3.9223e-07	390	303	496	336	211	196	179	203	Lcp2	lymphocyte cytosolic protein 2 [Source:MGI Symbol;Acc:MGI:1321402]
ENSMUSG00000008226	149.93	356.07	-1.2461	9.9035e-09	4.0159e-07	109	119	199	129	283	454	354	503	Scrn3	secernin 3 [Source:MGI Symbol;Acc:MGI:1921866]
ENSMUSG00000019990	150.55	448.13	-1.5743	9.9292e-09	4.0208e-07	145	114	189	106	247	567	628	594	Pde7b	phosphodiesterase 7B [Source:MGI Symbol;Acc:MGI:1352752]
ENSMUSG00000041449	74.62	8.46	3.1777	1.0182e-08	4.1175e-07	58	57	129	35	17	7	3	8	Serpina3h	serine (or cysteine) peptidase inhibitor, clade A, member 3H [Source:MGI Symbol;Acc:MGI:2182839]
ENSMUSG00000034041	50.71	160.94	-1.6663	1.0293e-08	4.1567e-07	35	68	53	30	140	196	151	230	Lyl1	lymphoblastomic leukemia 1 [Source:MGI Symbol;Acc:MGI:96891]
ENSMUSG00000107317	27.96	76.32	-1.4471	1.0368e-08	4.1795e-07	20	23	29	31	64	105	84	88	Gm19719	predicted gene, 19719 [Source:MGI Symbol;Acc:MGI:5011904]
ENSMUSG00000071656	341.45	730	-1.0977	1.0929e-08	4.3956e-07	374	289	314	264	588	826	865	985	Lrrn4cl	LRRN4 C-terminal like [Source:MGI Symbol;Acc:MGI:1916102]
ENSMUSG00000001156	1635.78	556.87	1.5557	1.1125e-08	4.4685e-07	1068	1133	1952	1912	749	543	518	597	Mxd1	MAX dimerization protein 1 [Source:MGI Symbol;Acc:MGI:96908]
ENSMUSG00000042719	1440.44	527.08	1.4513	1.1198e-08	4.4918e-07	1279	779	1696	1559	632	550	565	553	Naa25	N(alpha)-acetyltransferase 25, NatB auxiliary subunit [Source:MGI Symbol;Acc:MGI:2442563]
ENSMUSG00000102329	32.01	0.43	6.1429	1.1294e-08	4.524e-07	34	24	23	35	0	0	0	2	Gm10851	predicted gene 10851 [Source:MGI Symbol;Acc:MGI:3641824]
ENSMUSG00000040867	96.47	23.7	2.0194	1.2676e-08	5.0504e-07	111	96	59	81	19	25	42	20	Begain	brain-enriched guanylate kinase-associated [Source:MGI Symbol;Acc:MGI:3044626]
ENSMUSG00000050445	86.77	20.82	2.051	1.2976e-08	5.163e-07	64	93	71	89	13	22	16	43	Cyp8b1	cytochrome P450, family 8, subfamily b, polypeptide 1 [Source:MGI Symbol;Acc:MGI:1338044]
ENSMUSG00000006642	974.21	3490.28	-1.8406	1.3513e-08	5.3543e-07	558	645	1776	695	2868	4077	3724	4923	Tcf23	transcription factor 23 [Source:MGI Symbol;Acc:MGI:1934960]
ENSMUSG00000044749	40.73	180.54	-2.1432	1.3529e-08	5.3543e-07	22	18	62	51	105	237	257	220	Abca6	ATP-binding cassette, sub-family A (ABC1), member 6 [Source:MGI Symbol;Acc:MGI:1923434]
ENSMUSG00000059213	32.04	0.42	6.1481	1.3498e-08	5.3543e-07	25	24	23	45	0	1	1	0	Ddn	dendrin [Source:MGI Symbol;Acc:MGI:108101]
ENSMUSG00000069873	42.3	4.21	3.3188	1.3705e-08	5.4166e-07	46	14	67	30	3	8	5	3	4930438A08Rik	RIKEN cDNA 4930438A08 gene [Source:MGI Symbol;Acc:MGI:1921238]
ENSMUSG00000052981	122.78	37.1	1.7237	1.3953e-08	5.5071e-07	126	133	78	106	33	43	32	57	Ube2ql1	ubiquitin-conjugating enzyme E2Q family-like 1 [Source:MGI Symbol;Acc:MGI:1924230]
ENSMUSG00000019718	46.3	113.04	-1.2911	1.473e-08	5.7983e-07	39	41	50	40	79	143	135	152	L3hypdh	L-3-hydroxyproline dehydratase (trans-) [Source:MGI Symbol;Acc:MGI:1914467]
ENSMUSG00000074342	112.5	34.07	1.7294	1.4793e-08	5.8078e-07	87	59	152	120	36	37	35	42	I830077J02Rik	RIKEN cDNA I830077J02 gene [Source:MGI Symbol;Acc:MGI:3588284]
ENSMUSG00000079168	4.46	49.61	-3.4917	1.4788e-08	5.8078e-07	3	10	2	1	38	45	40	99	Cd209g	CD209g antigen [Source:MGI Symbol;Acc:MGI:1917442]
ENSMUSG00000024866	56.18	178.5	-1.6693	1.4887e-08	5.8367e-07	37	84	48	36	155	194	229	217	Acy3	aspartoacylase (aminoacylase) 3 [Source:MGI Symbol;Acc:MGI:1918920]
ENSMUSG00000020609	72.2	327.69	-2.1807	1.5194e-08	5.9495e-07	43	63	102	61	179	215	586	505	Apob	apolipoprotein B [Source:MGI Symbol;Acc:MGI:88052]
ENSMUSG00000031844	448.84	67.03	2.7446	1.5247e-08	5.9621e-07	821	253	203	308	81	62	46	103	Hsd17b2	hydroxysteroid (17-beta) dehydrogenase 2 [Source:MGI Symbol;Acc:MGI:1096386]
ENSMUSG00000038530	650.16	191.06	1.7648	1.5367e-08	6.0014e-07	613	868	432	434	116	239	238	272	Rgs4	regulator of G-protein signaling 4 [Source:MGI Symbol;Acc:MGI:108409]
ENSMUSG00000038354	55.56	159.19	-1.5166	1.5396e-08	6.0048e-07	32	42	63	69	108	214	191	205	Ankrd35	ankyrin repeat domain 35 [Source:MGI Symbol;Acc:MGI:2442590]
ENSMUSG00000028179	197.12	30.09	2.7131	1.543e-08	6.0101e-07	281	247	65	104	33	26	37	36	Cth	cystathionase (cystathionine gamma-lyase) [Source:MGI Symbol;Acc:MGI:1339968]
ENSMUSG00000004031	5.73	45.12	-2.9821	1.5562e-08	6.0454e-07	5	8	7	1	23	79	59	45	Brinp2	bone morphogenic protein/retinoic acid inducible neural-specific 2 [Source:MGI Symbol;Acc:MGI:2443333]
ENSMUSG00000079470	45.76	126.98	-1.4731	1.5702e-08	6.0919e-07	32	56	48	32	105	181	159	123	Utp14b	UTP14B small subunit processome component [Source:MGI Symbol;Acc:MGI:2445092]
ENSMUSG00000036181	1411.04	3203.5	-1.1828	1.5962e-08	6.1848e-07	1043	1328	1465	1352	3083	4352	4332	2443	H1f2	H1.2 linker histone, cluster member [Source:MGI Symbol;Acc:MGI:1931526]
ENSMUSG00000014773	279.4	113.11	1.2995	1.6358e-08	6.3296e-07	287	248	246	235	73	138	172	128	Dll1	delta like canonical Notch ligand 1 [Source:MGI Symbol;Acc:MGI:104659]
ENSMUSG00000026389	354.89	760.91	-1.1018	1.6454e-08	6.3587e-07	391	302	320	276	631	851	864	1051	Steap3	STEAP family member 3 [Source:MGI Symbol;Acc:MGI:1915678]
ENSMUSG00000038143	151.44	394.51	-1.3828	1.7e-08	6.5611e-07	136	113	140	165	256	525	610	392	Stox2	storkhead box 2 [Source:MGI Symbol;Acc:MGI:1918319]
ENSMUSG00000082088	77.49	22.87	1.7675	1.7156e-08	6.6126e-07	48	72	105	63	23	27	18	33	Gm15753	predicted gene 15753 [Source:MGI Symbol;Acc:MGI:3783195]
ENSMUSG00000037649	115.36	240.82	-1.063	1.8242e-08	7.022e-07	119	95	105	101	247	243	301	271	H2-DMa	histocompatibility 2, class II, locus DMa [Source:MGI Symbol;Acc:MGI:95921]
ENSMUSG00000044811	40.14	146.36	-1.8571	1.8483e-08	7.1058e-07	25	23	58	44	196	147	147	143	Cd300c2	CD300C molecule 2 [Source:MGI Symbol;Acc:MGI:2153249]
ENSMUSG00000074743	2509.24	5400.61	-1.1059	1.9265e-08	7.3967e-07	2639	1720	2605	2207	4928	5893	5533	7630	Thbd	thrombomodulin [Source:MGI Symbol;Acc:MGI:98736]
ENSMUSG00000028005	220	610.96	-1.4712	1.9375e-08	7.4292e-07	140	156	321	204	709	687	544	733	Gucy1b1	guanylate cyclase 1, soluble, beta 1 [Source:MGI Symbol;Acc:MGI:1860604]
ENSMUSG00000038085	372.23	83.85	2.1499	2.0637e-08	7.8825e-07	488	456	183	199	82	95	83	111	Cnbd2	cyclic nucleotide binding domain containing 2 [Source:MGI Symbol;Acc:MGI:1918123]
ENSMUSG00000000562	38.44	4.79	2.9802	2.2147e-08	8.4482e-07	34	18	58	33	2	8	9	3	Adora3	adenosine A3 receptor [Source:MGI Symbol;Acc:MGI:104847]
ENSMUSG00000042647	53.26	148	-1.4736	2.2849e-08	8.7048e-07	27	62	48	59	123	181	157	200	Acad12	acyl-Coenzyme A dehydrogenase family, member 12 [Source:MGI Symbol;Acc:MGI:2443320]
ENSMUSG00000086233	6.78	56.29	-3.0788	2.3114e-08	8.7948e-07	11	6	3	4	30	63	118	45	Gm11816	predicted gene 11816 [Source:MGI Symbol;Acc:MGI:3650294]
ENSMUSG00000032816	59.97	152.91	-1.356	2.3904e-08	9.0717e-07	58	46	45	69	113	192	210	172	Igdcc4	immunoglobulin superfamily, DCC subclass, member 4 [Source:MGI Symbol;Acc:MGI:1858497]
ENSMUSG00000052821	38.55	104.84	-1.4491	2.5028e-08	9.4863e-07	34	32	36	39	66	130	130	148	Cysltr1	cysteinyl leukotriene receptor 1 [Source:MGI Symbol;Acc:MGI:1926218]
ENSMUSG00000028163	3964.14	1462.36	1.4389	2.5176e-08	9.5302e-07	3931	1970	4101	4536	1580	1582	1597	1670	Nfkb1	nuclear factor of kappa light polypeptide gene enhancer in B cells 1, p105 [Source:MGI Symbol;Acc:MGI:97312]
ENSMUSG00000021303	153.81	50.25	1.6166	2.61e-08	9.8675e-07	140	74	189	165	51	62	55	54	Gng4	guanine nucleotide binding protein (G protein), gamma 4 [Source:MGI Symbol;Acc:MGI:102703]
ENSMUSG00000030147	1.87	25.19	-3.7209	2.7423e-08	1.0354e-06	1	2	3	1	30	27	32	21	Clec4b1	C-type lectin domain family 4, member b1 [Source:MGI Symbol;Acc:MGI:1917060]
ENSMUSG00000004359	63.59	9.33	2.7917	2.8009e-08	1.0562e-06	29	35	118	59	14	11	7	8	Spic	Spi-C transcription factor (Spi-1/PU.1 related) [Source:MGI Symbol;Acc:MGI:1341168]
ENSMUSG00000004360	2.62	29.28	-3.4439	2.813e-08	1.0594e-06	1	3	6	0	20	37	44	31	9330159F19Rik	RIKEN cDNA 9330159F19 gene [Source:MGI Symbol;Acc:MGI:3036239]
ENSMUSG00000027966	859.73	2835.87	-1.7216	3.0039e-08	1.127e-06	785	551	1396	467	2083	3917	3394	3357	Col11a1	collagen, type XI, alpha 1 [Source:MGI Symbol;Acc:MGI:88446]
ENSMUSG00000042359	30.13	87.98	-1.5516	3.4457e-08	1.2871e-06	34	19	32	25	65	103	100	127	Osbpl6	oxysterol binding protein-like 6 [Source:MGI Symbol;Acc:MGI:2139014]
ENSMUSG00000024912	92.96	13.08	2.8515	3.448e-08	1.2871e-06	50	36	137	126	23	8	12	12	Fosl1	fos-like antigen 1 [Source:MGI Symbol;Acc:MGI:107179]
ENSMUSG00000032122	49	201.91	-2.0348	3.468e-08	1.2929e-06	25	27	86	47	258	180	204	234	Slc37a2	solute carrier family 37 (glycerol-3-phosphate transporter), member 2 [Source:MGI Symbol;Acc:MGI:1929693]
ENSMUSG00000045287	28.34	93.44	-1.7287	3.5346e-08	1.3161e-06	25	36	24	18	60	107	137	118	Rtn4rl1	reticulon 4 receptor-like 1 [Source:MGI Symbol;Acc:MGI:2661375]
ENSMUSG00000115009	197.46	71.34	1.4646	3.5727e-08	1.3283e-06	177	213	125	200	55	92	102	71	G930009F23Rik	RIKEN cDNA G930009F23 gene [Source:MGI Symbol;Acc:MGI:3642701]
ENSMUSG00000056671	205.54	73.9	1.4813	3.5763e-08	1.3283e-06	217	192	152	183	98	81	70	71	Prelid2	PRELI domain containing 2 [Source:MGI Symbol;Acc:MGI:1924869]
ENSMUSG00000086866	28.51	5.34	2.4023	3.747e-08	1.3882e-06	26	23	24	31	4	7	6	7	4930512H18Rik	RIKEN cDNA 4930512H18 gene [Source:MGI Symbol;Acc:MGI:1922361]
ENSMUSG00000021708	30.53	105.32	-1.7865	3.7976e-08	1.4052e-06	23	24	39	27	53	137	160	130	Rasgrf2	RAS protein-specific guanine nucleotide-releasing factor 2 [Source:MGI Symbol;Acc:MGI:109137]
ENSMUSG00000039313	5.29	39.36	-2.8765	3.8167e-08	1.4105e-06	2	3	9	6	18	58	57	47	Minar1	membrane integral NOTCH2 associated receptor 1 [Source:MGI Symbol;Acc:MGI:2667167]
ENSMUSG00000052726	23.05	71.65	-1.6485	3.8654e-08	1.4267e-06	28	19	15	21	63	80	100	76	Kcnt2	potassium channel, subfamily T, member 2 [Source:MGI Symbol;Acc:MGI:3036273]
ENSMUSG00000031442	223.93	811.61	-1.8562	3.8973e-08	1.4367e-06	168	102	348	219	1045	866	678	933	Mcf2l	mcf.2 transforming sequence-like [Source:MGI Symbol;Acc:MGI:103263]
ENSMUSG00000015312	1216.94	460.86	1.4016	3.9329e-08	1.448e-06	868	698	1429	1513	488	454	579	507	Gadd45b	growth arrest and DNA-damage-inducible 45 beta [Source:MGI Symbol;Acc:MGI:107776]
ENSMUSG00000055322	6234.09	12898.1	-1.0489	4.1503e-08	1.5224e-06	4773	5166	7235	5822	8400	16215	16244	17386	Tns1	tensin 1 [Source:MGI Symbol;Acc:MGI:104552]
ENSMUSG00000031750	319.46	83.06	1.94	4.2711e-08	1.5647e-06	453	286	187	215	56	126	84	109	Il34	interleukin 34 [Source:MGI Symbol;Acc:MGI:1923777]
ENSMUSG00000026786	799.2	377.23	1.0829	4.277e-08	1.565e-06	786	530	933	687	328	424	411	517	Apbb1ip	amyloid beta (A4) precursor protein-binding, family B, member 1 interacting protein [Source:MGI Symbol;Acc:MGI:1861354]
ENSMUSG00000021367	803.69	161.43	2.3156	4.3962e-08	1.6066e-06	1423	402	507	525	159	142	172	240	Edn1	endothelin 1 [Source:MGI Symbol;Acc:MGI:95283]
ENSMUSG00000038065	225.25	536.61	-1.2544	4.414e-08	1.6111e-06	202	251	185	181	348	645	694	736	Mturn	maturin, neural progenitor differentiation regulator homolog (Xenopus) [Source:MGI Symbol;Acc:MGI:1915485]
ENSMUSG00000063568	211.54	473.48	-1.1627	4.4325e-08	1.6159e-06	194	211	236	134	421	535	668	483	Jazf1	JAZF zinc finger 1 [Source:MGI Symbol;Acc:MGI:2141450]
ENSMUSG00000034810	145.48	612.02	-2.0724	4.4646e-08	1.6256e-06	154	63	221	101	378	760	560	1070	Scn7a	sodium channel, voltage-gated, type VII, alpha [Source:MGI Symbol;Acc:MGI:102965]
ENSMUSG00000060275	6.42	36.22	-2.479	4.5175e-08	1.6429e-06	2	8	9	5	32	31	51	47	Nrg2	neuregulin 2 [Source:MGI Symbol;Acc:MGI:1098246]
ENSMUSG00000020901	1142.51	290.29	1.9785	4.5595e-08	1.6561e-06	1106	657	1408	1038	478	239	201	312	Pik3r5	phosphoinositide-3-kinase regulatory subunit 5 [Source:MGI Symbol;Acc:MGI:2443588]
ENSMUSG00000025766	55.14	126.76	-1.2037	4.5987e-08	1.6683e-06	38	62	50	52	100	170	149	149	D3Ertd751e	DNA segment, Chr 3, ERATO Doi 751, expressed [Source:MGI Symbol;Acc:MGI:1289213]
ENSMUSG00000105867	23.54	124.46	-2.4002	4.7063e-08	1.7052e-06	29	5	36	17	122	118	120	190	Gm42517	predicted gene 42517 [Source:MGI Symbol;Acc:MGI:5662654]
ENSMUSG00000097101	30.77	93.69	-1.5984	4.7736e-08	1.7275e-06	21	27	39	27	99	85	88	140	1810034E14Rik	RIKEN cDNA 1810034E14 gene [Source:MGI Symbol;Acc:MGI:1913753]
ENSMUSG00000032691	178.72	53.62	1.7434	4.8483e-08	1.7524e-06	157	109	246	150	67	41	77	48	Nlrp3	NLR family, pyrin domain containing 3 [Source:MGI Symbol;Acc:MGI:2653833]
ENSMUSG00000056501	935.18	235.96	1.9892	4.9516e-08	1.7854e-06	529	704	1053	1182	396	192	211	199	Cebpb	CCAAT/enhancer binding protein (C/EBP), beta [Source:MGI Symbol;Acc:MGI:88373]
ENSMUSG00000033213	2302.5	471.23	2.2896	4.9497e-08	1.7854e-06	1395	980	3371	2878	764	331	435	469	AA467197	expressed sequence AA467197 [Source:MGI Symbol;Acc:MGI:3034182]
ENSMUSG00000027796	28.28	131.47	-2.2058	4.9786e-08	1.7907e-06	19	10	55	23	152	130	136	157	Smad9	SMAD family member 9 [Source:MGI Symbol;Acc:MGI:1859993]
ENSMUSG00000055546	52.68	13.97	1.9023	5.2287e-08	1.8761e-06	50	57	51	34	9	13	20	21	Timd4	T cell immunoglobulin and mucin domain containing 4 [Source:MGI Symbol;Acc:MGI:2445125]
ENSMUSG00000052026	15.27	133.15	-3.118	5.2411e-08	1.8783e-06	16	4	27	10	208	64	82	212	Slc6a7	solute carrier family 6 (neurotransmitter transporter, L-proline), member 7 [Source:MGI Symbol;Acc:MGI:2147363]
ENSMUSG00000037428	31.21	3.82	3.0845	5.2577e-08	1.882e-06	26	16	33	40	7	4	1	4	Vgf	VGF nerve growth factor inducible [Source:MGI Symbol;Acc:MGI:1343180]
ENSMUSG00000037979	58.27	164.47	-1.4964	5.6484e-08	2.0097e-06	48	60	77	30	125	205	223	185	Ccdc92	coiled-coil domain containing 92 [Source:MGI Symbol;Acc:MGI:106485]
ENSMUSG00000079547	103.27	215.5	-1.0621	5.6987e-08	2.0251e-06	101	81	109	87	195	241	305	217	H2-DMb1	histocompatibility 2, class II, locus Mb1 [Source:MGI Symbol;Acc:MGI:95922]
ENSMUSG00000030681	8950.55	4280.83	1.0642	5.9251e-08	2.0981e-06	7762	9492	7304	8026	5069	4454	4846	4329	Mvp	major vault protein [Source:MGI Symbol;Acc:MGI:1925638]
ENSMUSG00000035711	174.7	84.91	1.04	5.9253e-08	2.0981e-06	166	137	197	141	75	102	90	111	Dok3	docking protein 3 [Source:MGI Symbol;Acc:MGI:1351490]
ENSMUSG00000064043	164.13	376.42	-1.1951	5.9666e-08	2.1102e-06	111	112	228	160	313	444	463	461	Trerf1	transcriptional regulating factor 1 [Source:MGI Symbol;Acc:MGI:2442086]
ENSMUSG00000068122	4.91	32.59	-2.7317	6.6514e-08	2.3448e-06	4	7	6	1	29	34	52	30	Agtr2	angiotensin II receptor, type 2 [Source:MGI Symbol;Acc:MGI:87966]
ENSMUSG00000115338	4527.49	1923.69	1.2352	6.6538e-08	2.3448e-06	4307	3603	4809	3865	2561	1849	2136	1777	Pnp	purine-nucleoside phosphorylase [Source:MGI Symbol;Acc:MGI:97365]
ENSMUSG00000006235	18.34	63.16	-1.7994	6.7792e-08	2.3834e-06	21	20	12	13	46	81	91	66	Epor	erythropoietin receptor [Source:MGI Symbol;Acc:MGI:95408]
ENSMUSG00000042734	1513.81	354.64	2.0932	6.815e-08	2.3931e-06	2451	1271	798	852	257	509	434	396	Ttc9	tetratricopeptide repeat domain 9 [Source:MGI Symbol;Acc:MGI:1916730]
ENSMUSG00000027225	29.82	2.83	3.3639	6.8514e-08	2.403e-06	32	37	27	12	1	4	2	6	Duoxa2	dual oxidase maturation factor 2 [Source:MGI Symbol;Acc:MGI:1914061]
ENSMUSG00000048621	121.25	26.87	2.1915	6.8983e-08	2.4166e-06	119	74	145	108	48	29	18	18	Gm6377	predicted gene 6377 [Source:MGI Symbol;Acc:MGI:3647255]
ENSMUSG00000018920	3581.47	827.03	2.1147	6.9209e-08	2.4216e-06	6007	2289	2053	2380	1048	829	879	837	Cxcl16	chemokine (C-X-C motif) ligand 16 [Source:MGI Symbol;Acc:MGI:1932682]
ENSMUSG00000051076	2158.43	632.34	1.7713	6.9291e-08	2.4217e-06	3115	1344	1389	1888	683	872	565	664	Vtcn1	V-set domain containing T cell activation inhibitor 1 [Source:MGI Symbol;Acc:MGI:3039619]
ENSMUSG00000027368	602.78	149	2.0205	7.0239e-08	2.4519e-06	491	540	756	437	268	108	115	134	Dusp2	dual specificity phosphatase 2 [Source:MGI Symbol;Acc:MGI:101911]
ENSMUSG00000038071	1.58	24.55	-3.9213	7.033e-08	2.4522e-06	0	3	3	0	16	37	28	30	Npy6r	neuropeptide Y receptor Y6 [Source:MGI Symbol;Acc:MGI:1098590]
ENSMUSG00000024235	1039.73	328.84	1.662	7.1112e-08	2.4765e-06	734	510	1470	1163	408	336	324	363	Map3k8	mitogen-activated protein kinase kinase kinase 8 [Source:MGI Symbol;Acc:MGI:1346878]
ENSMUSG00000031444	65.18	14.48	2.2001	7.1266e-08	2.479e-06	56	44	85	56	25	9	16	11	F10	coagulation factor X [Source:MGI Symbol;Acc:MGI:103107]
ENSMUSG00000019987	262.55	80.53	1.7101	7.2035e-08	2.5028e-06	150	174	361	295	103	101	63	83	Arg1	arginase, liver [Source:MGI Symbol;Acc:MGI:88070]
ENSMUSG00000026163	2.95	32.37	-3.4477	7.235e-08	2.5108e-06	3	1	5	2	12	56	44	37	Sphkap	SPHK1 interactor, AKAP domain containing [Source:MGI Symbol;Acc:MGI:1924879]
ENSMUSG00000031963	547.59	230.11	1.2528	7.2491e-08	2.5127e-06	425	377	761	470	248	215	259	289	Bmper	BMP-binding endothelial regulator [Source:MGI Symbol;Acc:MGI:1920480]
ENSMUSG00000046259	49.09	3.02	4.0941	7.4305e-08	2.5726e-06	75	52	23	24	8	2	2	0	Sprr2h	small proline-rich protein 2H [Source:MGI Symbol;Acc:MGI:1330343]
ENSMUSG00000027596	55.06	7.25	2.9082	7.6278e-08	2.6378e-06	56	88	27	26	4	12	10	7	a	nonagouti [Source:MGI Symbol;Acc:MGI:87853]
ENSMUSG00000019832	1795.68	806.05	1.1559	7.6793e-08	2.6525e-06	1982	1135	1943	1504	842	853	902	954	Rab32	RAB32, member RAS oncogene family [Source:MGI Symbol;Acc:MGI:1915094]
ENSMUSG00000056870	102.35	280.4	-1.457	7.6925e-08	2.654e-06	95	126	91	60	189	373	345	358	Gulp1	GULP, engulfment adaptor PTB domain containing 1 [Source:MGI Symbol;Acc:MGI:1920407]
ENSMUSG00000018217	1210.61	2888.29	-1.2548	8.0199e-08	2.7573e-06	1189	1403	1057	746	2244	3364	3709	3623	Pmp22	peripheral myelin protein 22 [Source:MGI Symbol;Acc:MGI:97631]
ENSMUSG00000081769	61.75	20.98	1.557	8.0346e-08	2.7592e-06	48	72	49	56	20	25	26	22	Gm12216	predicted gene 12216 [Source:MGI Symbol;Acc:MGI:3650088]
ENSMUSG00000087477	21.38	1.61	3.7539	8.2038e-08	2.8075e-06	25	16	24	13	2	1	3	1	Gm13822	predicted gene 13822 [Source:MGI Symbol;Acc:MGI:3650351]
ENSMUSG00000096472	364.36	176.33	1.0495	8.4573e-08	2.8876e-06	302	367	407	262	190	172	213	200	Cdkn2d	cyclin dependent kinase inhibitor 2D [Source:MGI Symbol;Acc:MGI:105387]
ENSMUSG00000026589	111.31	290.13	-1.3851	8.7053e-08	2.9688e-06	92	137	91	85	183	367	404	358	Sec16b	SEC16 homolog B (S. cerevisiae) [Source:MGI Symbol;Acc:MGI:2148802]
ENSMUSG00000032487	5202.85	294.51	4.1432	9.3248e-08	3.1728e-06	3924	434	5665	9283	427	291	307	240	Ptgs2	prostaglandin-endoperoxide synthase 2 [Source:MGI Symbol;Acc:MGI:97798]
ENSMUSG00000051855	63.12	196.4	-1.6312	9.477e-08	3.2209e-06	39	57	101	39	231	196	206	225	Mest	mesoderm specific transcript [Source:MGI Symbol;Acc:MGI:96968]
ENSMUSG00000004187	45.78	113.33	-1.3098	9.5961e-08	3.2539e-06	32	46	43	47	85	158	112	154	Kifc2	kinesin family member C2 [Source:MGI Symbol;Acc:MGI:109187]
ENSMUSG00000058354	101.84	4.3	4.5891	9.7031e-08	3.2864e-06	37	282	19	26	8	4	4	2	Krt6a	keratin 6A [Source:MGI Symbol;Acc:MGI:1100845]
ENSMUSG00000043008	29.15	95.32	-1.6969	9.7464e-08	3.2973e-06	20	21	47	21	114	97	111	94	Klhl6	kelch-like 6 [Source:MGI Symbol;Acc:MGI:2686922]
ENSMUSG00000030595	1298.53	436.71	1.5735	9.8691e-08	3.335e-06	1359	799	1337	1254	641	406	440	386	Nfkbib	nuclear factor of kappa light polypeptide gene enhancer in B cells inhibitor, beta [Source:MGI Symbol;Acc:MGI:104752]
ENSMUSG00000039252	97.79	27.45	1.8307	9.9999e-08	3.3753e-06	88	129	71	66	24	22	33	43	Lgi2	leucine-rich repeat LGI family, member 2 [Source:MGI Symbol;Acc:MGI:2180196]
ENSMUSG00000039145	60.27	154.57	-1.3594	1.0087e-07	3.4007e-06	63	38	69	51	136	209	209	135	Camk1d	calcium/calmodulin-dependent protein kinase ID [Source:MGI Symbol;Acc:MGI:2442190]
ENSMUSG00000028191	1099.03	520.92	1.0773	1.0114e-07	3.4023e-06	1260	859	983	887	542	565	634	555	Bcl10	B cell leukemia/lymphoma 10 [Source:MGI Symbol;Acc:MGI:1337994]
ENSMUSG00000087006	242.67	53.54	2.1876	1.0193e-07	3.4251e-06	249	306	142	176	91	38	44	53	Gm13889	predicted gene 13889 [Source:MGI Symbol;Acc:MGI:3652053]
ENSMUSG00000020122	3357.48	1604.26	1.0653	1.023e-07	3.4335e-06	2841	2117	3942	3486	1207	2005	2023	1966	Egfr	epidermal growth factor receptor [Source:MGI Symbol;Acc:MGI:95294]
ENSMUSG00000019489	21.82	2.4	3.1455	1.0275e-07	3.4448e-06	21	23	15	20	1	4	3	3	Cd70	CD70 antigen [Source:MGI Symbol;Acc:MGI:1195273]
ENSMUSG00000104801	20.48	0.85	4.5169	1.0359e-07	3.469e-06	13	21	16	25	0	1	2	1	Gm43834	predicted gene 43834 [Source:MGI Symbol;Acc:MGI:5663971]
ENSMUSG00000039270	95.08	197.19	-1.0548	1.0883e-07	3.6401e-06	86	77	105	81	141	245	235	266	Megf9	multiple EGF-like-domains 9 [Source:MGI Symbol;Acc:MGI:1918264]
ENSMUSG00000031891	1099.92	5024.48	-2.1918	1.1032e-07	3.6858e-06	1264	1535	828	327	3624	5673	7365	5923	Hsd11b2	hydroxysteroid 11-beta dehydrogenase 2 [Source:MGI Symbol;Acc:MGI:104720]
ENSMUSG00000030806	316.7	107.5	1.5549	1.118e-07	3.727e-06	225	287	274	375	55	114	148	172	Stx1b	syntaxin 1B [Source:MGI Symbol;Acc:MGI:1930705]
ENSMUSG00000021236	1618.3	3890.6	-1.2657	1.1326e-07	3.7712e-06	1129	1687	1324	1780	2548	5741	5304	3995	Entpd5	ectonucleoside triphosphate diphosphohydrolase 5 [Source:MGI Symbol;Acc:MGI:1321385]
ENSMUSG00000002831	146.9	615.13	-2.0657	1.1503e-07	3.8233e-06	77	184	157	124	440	490	483	1346	Plin4	perilipin 4 [Source:MGI Symbol;Acc:MGI:1929709]
ENSMUSG00000024772	12009.7	4109.3	1.5472	1.2025e-07	3.9817e-06	17059	7368	9868	8965	4243	4361	5086	4429	Ehd1	EH-domain containing 1 [Source:MGI Symbol;Acc:MGI:1341878]
ENSMUSG00000047798	160.53	41.25	1.9741	1.2212e-07	4.0345e-06	117	103	200	175	71	35	35	33	Cd300lf	CD300 molecule like family member F [Source:MGI Symbol;Acc:MGI:2442359]
ENSMUSG00000021725	949.29	325.27	1.5451	1.2225e-07	4.0345e-06	1342	591	783	704	328	375	394	340	Parp8	poly (ADP-ribose) polymerase family, member 8 [Source:MGI Symbol;Acc:MGI:1098713]
ENSMUSG00000028874	281.84	91.67	1.6261	1.228e-07	4.0455e-06	256	166	384	237	127	77	100	91	Fgr	FGR proto-oncogene, Src family tyrosine kinase [Source:MGI Symbol;Acc:MGI:95527]
ENSMUSG00000042156	95.06	229.3	-1.2704	1.2385e-07	4.0734e-06	60	101	109	81	150	321	271	294	Dzip1	DAZ interacting protein 1 [Source:MGI Symbol;Acc:MGI:1914311]
ENSMUSG00000002944	593.44	2005.12	-1.757	1.2467e-07	4.0961e-06	652	727	505	261	1302	2420	2889	2444	Cd36	CD36 molecule [Source:MGI Symbol;Acc:MGI:107899]
ENSMUSG00000052212	24.12	3.53	2.7491	1.2511e-07	4.106e-06	20	28	22	18	2	3	6	5	Cd177	CD177 antigen [Source:MGI Symbol;Acc:MGI:1916141]
ENSMUSG00000097572	101.28	39.43	1.3608	1.2944e-07	4.2433e-06	65	92	111	106	34	56	53	33	Gm26797	predicted gene, 26797 [Source:MGI Symbol;Acc:MGI:5477291]
ENSMUSG00000025551	4.84	32.27	-2.732	1.3814e-07	4.513e-06	4	2	7	5	17	50	33	47	Fgf14	fibroblast growth factor 14 [Source:MGI Symbol;Acc:MGI:109189]
ENSMUSG00000053040	184.46	642.58	-1.7989	1.3833e-07	4.513e-06	124	79	274	213	682	674	551	920	Aph1c	aph1 homolog C, gamma secretase subunit [Source:MGI Symbol;Acc:MGI:1915568]
ENSMUSG00000044338	72.35	237.31	-1.7088	1.4053e-07	4.5704e-06	43	60	129	40	219	286	262	287	Aplnr	apelin receptor [Source:MGI Symbol;Acc:MGI:1346086]
ENSMUSG00000036437	12.94	44.39	-1.792	1.4065e-07	4.5704e-06	13	13	11	10	31	60	56	53	Npy1r	neuropeptide Y receptor Y1 [Source:MGI Symbol;Acc:MGI:104963]
ENSMUSG00000045065	21.06	1.83	3.5418	1.4737e-07	4.7782e-06	24	14	24	15	2	1	1	4	9930022D16Rik	RIKEN cDNA 9930022D16 gene [Source:MGI Symbol;Acc:MGI:2444178]
ENSMUSG00000033082	55.56	154.59	-1.4681	1.4783e-07	4.7879e-06	36	36	88	48	163	181	157	180	Clec1a	C-type lectin domain family 1, member a [Source:MGI Symbol;Acc:MGI:2444151]
ENSMUSG00000085329	2.64	37.98	-3.8229	1.4818e-07	4.7938e-06	0	3	4	3	12	44	86	33	2810404F17Rik	RIKEN cDNA 2810404F17 gene [Source:MGI Symbol;Acc:MGI:1917218]
ENSMUSG00000018930	761.96	33.95	4.4954	1.5135e-07	4.891e-06	858	676	679	551	95	13	9	16	Ccl4	chemokine (C-C motif) ligand 4 [Source:MGI Symbol;Acc:MGI:98261]
ENSMUSG00000057123	158.93	445.44	-1.4874	1.5295e-07	4.9374e-06	144	172	178	88	351	496	411	735	Gja5	gap junction protein, alpha 5 [Source:MGI Symbol;Acc:MGI:95716]
ENSMUSG00000022122	1253.2	4113.35	-1.7146	1.5395e-07	4.9644e-06	1289	622	1789	934	3295	4602	3526	6966	Ednrb	endothelin receptor type B [Source:MGI Symbol;Acc:MGI:102720]
ENSMUSG00000090523	715.14	325.18	1.136	1.5602e-07	5.0255e-06	761	484	822	553	253	430	419	356	Gypc	glycophorin C [Source:MGI Symbol;Acc:MGI:1098566]
ENSMUSG00000022048	969.05	478.62	1.0186	1.5769e-07	5.0739e-06	718	774	928	1141	501	452	555	599	Dpysl2	dihydropyrimidinase-like 2 [Source:MGI Symbol;Acc:MGI:1349763]
ENSMUSG00000042109	77.91	270.65	-1.7984	1.6148e-07	5.1845e-06	47	129	52	55	209	359	354	292	Csdc2	cold shock domain containing C2, RNA binding [Source:MGI Symbol;Acc:MGI:2146027]
ENSMUSG00000070530	414.12	985.56	-1.2522	1.6478e-07	5.279e-06	415	417	317	352	604	1264	1388	1206	Wfdc16	WAP four-disulfide core domain 16 [Source:MGI Symbol;Acc:MGI:2670994]
ENSMUSG00000025815	12.34	50.68	-2.0321	1.6685e-07	5.3395e-06	6	10	16	14	29	64	78	59	Dhtkd1	dehydrogenase E1 and transketolase domain containing 1 [Source:MGI Symbol;Acc:MGI:2445096]
ENSMUSG00000032715	642.32	136.13	2.2399	1.6724e-07	5.3462e-06	855	808	315	308	196	134	129	126	Trib3	tribbles pseudokinase 3 [Source:MGI Symbol;Acc:MGI:1345675]
ENSMUSG00000056185	150.99	361.84	-1.2598	1.7333e-07	5.529e-06	101	166	153	135	373	339	336	546	Snx32	sorting nexin 32 [Source:MGI Symbol;Acc:MGI:2444704]
ENSMUSG00000022885	192.67	615.11	-1.673	1.7974e-07	5.7213e-06	132	85	305	200	554	683	642	855	St6gal1	beta galactoside alpha 2,6 sialyltransferase 1 [Source:MGI Symbol;Acc:MGI:108470]
ENSMUSG00000044103	1800.15	63.4	4.8301	1.8117e-07	5.7605e-06	3711	335	1070	1246	151	47	28	30	Il1f9	interleukin 1 family, member 9 [Source:MGI Symbol;Acc:MGI:2449929]
ENSMUSG00000044313	3184.66	180.86	4.1387	1.8438e-07	5.8563e-06	6294	580	2038	2383	288	243	78	162	Mab21l3	mab-21-like 3 [Source:MGI Symbol;Acc:MGI:2446273]
ENSMUSG00000053141	2.65	29.74	-3.4683	1.8769e-07	5.955e-06	2	1	5	2	10	44	44	39	Ptprt	protein tyrosine phosphatase, receptor type, T [Source:MGI Symbol;Acc:MGI:1321152]
ENSMUSG00000073234	48.99	9.61	2.3264	1.9154e-07	6.0512e-06	54	54	27	41	4	11	18	11	Gm8773	predicted gene 8773 [Source:MGI Symbol;Acc:MGI:3646213]
ENSMUSG00000021318	195.54	494.46	-1.3373	1.9518e-07	6.1531e-06	143	119	267	198	350	626	719	531	Gli3	GLI-Kruppel family member GLI3 [Source:MGI Symbol;Acc:MGI:95729]
ENSMUSG00000104654	22.5	2.02	3.4692	1.9721e-07	6.2106e-06	24	24	13	20	2	5	1	1	Gm43814	predicted gene 43814 [Source:MGI Symbol;Acc:MGI:5663951]
ENSMUSG00000039851	8.23	34.13	-2.0618	1.9833e-07	6.239e-06	8	8	8	6	26	38	39	50	4932438H23Rik	RIKEN cDNA 4932438H23 gene [Source:MGI Symbol;Acc:MGI:1921637]
ENSMUSG00000113136	27.68	2.61	3.3749	2.0016e-07	6.29e-06	20	18	16	47	1	5	4	2	Gm19951	predicted gene, 19951 [Source:MGI Symbol;Acc:MGI:5012136]
ENSMUSG00000051910	10.53	51.39	-2.2828	2.0069e-07	6.3e-06	7	9	13	10	39	77	85	30	Sox6	SRY (sex determining region Y)-box 6 [Source:MGI Symbol;Acc:MGI:98368]
ENSMUSG00000032744	113.74	306.5	-1.4332	2.0129e-07	6.3119e-06	138	114	100	59	257	359	358	394	Heyl	hairy/enhancer-of-split related with YRPW motif-like [Source:MGI Symbol;Acc:MGI:1860511]
ENSMUSG00000053399	2.31	27.74	-3.5215	2.0478e-07	6.4146e-06	1	1	7	0	33	25	29	34	Adamts18	a disintegrin-like and metallopeptidase (reprolysin type) with thrombospondin type 1 motif, 18 [Source:MGI Symbol;Acc:MGI:2442600]
ENSMUSG00000040950	147.36	510.51	-1.7947	2.0826e-07	6.5167e-06	207	106	127	91	294	661	838	524	Mgl2	macrophage galactose N-acetyl-galactosamine specific lectin 2 [Source:MGI Symbol;Acc:MGI:2385729]
ENSMUSG00000021133	3019.24	1426.72	1.0813	2.0888e-07	6.5292e-06	3338	1852	3034	2794	1236	1652	1683	1786	Susd6	sushi domain containing 6 [Source:MGI Symbol;Acc:MGI:2444661]
ENSMUSG00000055782	6.02	42.45	-2.8227	2.2497e-07	7.0175e-06	5	7	6	4	28	33	34	96	Abcd2	ATP-binding cassette, sub-family D (ALD), member 2 [Source:MGI Symbol;Acc:MGI:1349467]
ENSMUSG00000050395	135.96	15.98	3.0883	2.2729e-07	7.0824e-06	194	20	89	187	15	22	24	10	Tnfsf15	tumor necrosis factor (ligand) superfamily, member 15 [Source:MGI Symbol;Acc:MGI:2180140]
ENSMUSG00000017929	7415.08	2225.75	1.7364	2.3988e-07	7.4356e-06	4644	3896	10079	9045	3053	1952	1974	2620	B4galt5	UDP-Gal:betaGlcNAc beta 1,4-galactosyltransferase, polypeptide 5 [Source:MGI Symbol;Acc:MGI:1927169]
ENSMUSG00000106290	396.74	94.01	2.0819	2.4244e-07	7.4992e-06	286	203	509	476	149	72	122	57	Gm43429	predicted gene 43429 [Source:MGI Symbol;Acc:MGI:5663566]
ENSMUSG00000055415	651.7	284.01	1.1976	2.5181e-07	7.7728e-06	674	391	595	718	243	406	301	318	Atp10b	ATPase, class V, type 10B [Source:MGI Symbol;Acc:MGI:2442688]
ENSMUSG00000037455	115.84	266.84	-1.2075	2.5496e-07	7.8618e-06	115	102	106	99	166	365	380	297	Slc18b1	solute carrier family 18, subfamily B, member 1 [Source:MGI Symbol;Acc:MGI:1923556]
ENSMUSG00000018925	35.03	2.31	3.946	2.5748e-07	7.9314e-06	19	7	43	62	3	2	1	4	Heatr9	HEAT repeat containing 9 [Source:MGI Symbol;Acc:MGI:3650286]
ENSMUSG00000036452	545.91	168.4	1.6962	2.6007e-07	8.0025e-06	716	232	471	559	148	198	228	176	Arhgap26	Rho GTPase activating protein 26 [Source:MGI Symbol;Acc:MGI:1918552]
ENSMUSG00000025582	1650.67	8064.3	-2.2885	2.7119e-07	8.319e-06	344	2387	1378	1988	5658	10036	10367	10246	Nptx1	neuronal pentraxin 1 [Source:MGI Symbol;Acc:MGI:107811]
ENSMUSG00000097194	171.95	64.35	1.4132	2.7408e-07	8.399e-06	128	136	178	191	40	81	60	110	9330175E14Rik	RIKEN cDNA 9330175E14 gene [Source:MGI Symbol;Acc:MGI:2443913]
ENSMUSG00000015652	1731.97	470.65	1.8802	2.8102e-07	8.585e-06	2590	1277	1226	1108	643	492	543	355	Steap1	six transmembrane epithelial antigen of the prostate 1 [Source:MGI Symbol;Acc:MGI:1917608]
ENSMUSG00000018500	948.81	185.45	2.3562	2.8088e-07	8.585e-06	459	271	1423	1420	237	176	214	178	Adora2b	adenosine A2b receptor [Source:MGI Symbol;Acc:MGI:99403]
ENSMUSG00000024598	115.96	327.06	-1.4963	2.8264e-07	8.6253e-06	61	144	114	108	196	420	477	389	Fbn2	fibrillin 2 [Source:MGI Symbol;Acc:MGI:95490]
ENSMUSG00000033209	254.78	622.65	-1.2882	3.0381e-07	9.2335e-06	163	168	347	271	438	860	789	718	Ttc28	tetratricopeptide repeat domain 28 [Source:MGI Symbol;Acc:MGI:2140873]
ENSMUSG00000043496	33.14	121.96	-1.8885	3.0459e-07	9.2476e-06	43	37	25	14	75	156	158	163	Tril	TLR4 interactor with leucine-rich repeats [Source:MGI Symbol;Acc:MGI:1914123]
ENSMUSG00000018425	3042.89	1460.83	1.0586	3.1019e-07	9.3985e-06	2887	3322	2109	2699	1417	1876	1501	1678	Dhx40	DEAH (Asp-Glu-Ala-His) box polypeptide 40 [Source:MGI Symbol;Acc:MGI:1914737]
ENSMUSG00000035184	565.12	1332.93	-1.2382	3.2707e-07	9.8897e-06	588	486	650	344	1065	1594	1311	1993	Fam124a	family with sequence similarity 124, member A [Source:MGI Symbol;Acc:MGI:3645930]
ENSMUSG00000038119	324.71	658.57	-1.0209	3.307e-07	9.9891e-06	226	317	304	345	446	895	817	813	Cdon	cell adhesion molecule-related/down-regulated by oncogenes [Source:MGI Symbol;Acc:MGI:1926387]
ENSMUSG00000029722	260.22	555.82	-1.094	3.356e-07	1.0117e-05	193	241	353	177	450	638	691	706	Agfg2	ArfGAP with FG repeats 2 [Source:MGI Symbol;Acc:MGI:2443267]
ENSMUSG00000048992	28.91	1.54	4.2024	3.3729e-07	1.0157e-05	52	26	15	9	1	3	2	1	Prss32	protease, serine 32 [Source:MGI Symbol;Acc:MGI:1917064]
ENSMUSG00000018916	56.77	3.07	4.2349	3.4202e-07	1.0289e-05	128	11	16	43	5	2	4	2	Csf2	colony stimulating factor 2 (granulocyte-macrophage) [Source:MGI Symbol;Acc:MGI:1339752]
ENSMUSG00000049103	192.92	452.09	-1.2262	3.4244e-07	1.0291e-05	159	141	268	147	528	458	443	547	Ccr2	chemokine (C-C motif) receptor 2 [Source:MGI Symbol;Acc:MGI:106185]
ENSMUSG00000029780	1012.28	444.73	1.1867	3.4674e-07	1.0399e-05	1248	707	900	813	458	504	540	460	Nt5c3	5'-nucleotidase, cytosolic III [Source:MGI Symbol;Acc:MGI:1927186]
ENSMUSG00000020182	7.8	35.37	-2.1753	3.5264e-07	1.0566e-05	5	5	10	9	22	45	39	54	Ddc	dopa decarboxylase [Source:MGI Symbol;Acc:MGI:94876]
ENSMUSG00000024580	1617.78	760.26	1.0891	3.5511e-07	1.0629e-05	1855	1068	1402	1550	656	995	904	836	Grpel2	GrpE-like 2, mitochondrial [Source:MGI Symbol;Acc:MGI:1334416]
ENSMUSG00000079451	104.22	20.32	2.3551	3.6251e-07	1.084e-05	152	38	86	100	17	36	25	13	Tmprss11g	transmembrane protease, serine 11g [Source:MGI Symbol;Acc:MGI:2444058]
ENSMUSG00000040387	13.77	49.47	-1.8547	3.6802e-07	1.0982e-05	12	15	10	13	38	66	77	41	Klhl32	kelch-like 32 [Source:MGI Symbol;Acc:MGI:3612790]
ENSMUSG00000112677	31.02	5.67	2.4647	3.8779e-07	1.1547e-05	15	21	42	38	6	8	6	5	Gm48868	predicted gene, 48868 [Source:MGI Symbol;Acc:MGI:6098613]
ENSMUSG00000092277	41.67	11.42	1.8512	3.8813e-07	1.1547e-05	30	29	47	48	6	16	14	16	Gm19684	predicted gene, 19684 [Source:MGI Symbol;Acc:MGI:5011869]
ENSMUSG00000024771	128.89	13.66	3.2521	3.9014e-07	1.1584e-05	266	42	90	58	26	13	8	10	Lipk	lipase, family member K [Source:MGI Symbol;Acc:MGI:2679259]
ENSMUSG00000060591	2984.23	913.54	1.7075	4.0369e-07	1.1962e-05	3094	4033	1867	1739	579	1115	1407	1029	Ifitm2	interferon induced transmembrane protein 2 [Source:MGI Symbol;Acc:MGI:1933382]
ENSMUSG00000037393	43.12	9.04	2.2518	4.1495e-07	1.2259e-05	40	54	19	42	9	11	11	9	Nmur2	neuromedin U receptor 2 [Source:MGI Symbol;Acc:MGI:2441765]
ENSMUSG00000064036	10.52	38.55	-1.863	4.2294e-07	1.2458e-05	7	11	14	7	37	54	38	42	Mro	maestro [Source:MGI Symbol;Acc:MGI:2152817]
ENSMUSG00000030077	64.22	14.51	2.1658	4.3059e-07	1.267e-05	68	38	91	40	22	12	10	18	Chl1	cell adhesion molecule L1-like [Source:MGI Symbol;Acc:MGI:1098266]
ENSMUSG00000036896	998.62	2089.88	-1.0655	4.3551e-07	1.2802e-05	1130	704	1092	720	2012	2388	2613	2245	C1qc	complement component 1, q subcomponent, C chain [Source:MGI Symbol;Acc:MGI:88225]
ENSMUSG00000034641	59.73	164.25	-1.4614	4.3752e-07	1.2849e-05	66	57	69	26	143	203	204	182	Cd300ld	CD300 molecule like family member d [Source:MGI Symbol;Acc:MGI:2442358]
ENSMUSG00000046610	36.86	6.4	2.5108	4.4635e-07	1.3095e-05	40	18	40	37	4	9	13	3	Oacyl	O-acyltransferase like [Source:MGI Symbol;Acc:MGI:2442915]
ENSMUSG00000032595	36.16	7.56	2.2487	4.6418e-07	1.3564e-05	27	31	37	38	5	4	8	17	Cdhr4	cadherin-related family member 4 [Source:MGI Symbol;Acc:MGI:1916648]
ENSMUSG00000011382	46.64	123.69	-1.4072	4.7066e-07	1.3713e-05	32	45	52	43	84	133	132	208	Dhdh	dihydrodiol dehydrogenase (dimeric) [Source:MGI Symbol;Acc:MGI:1919005]
ENSMUSG00000106951	17.88	65.03	-1.8547	4.7484e-07	1.3821e-05	8	14	26	19	38	87	95	75	5930430L01Rik	RIKEN cDNA 5930430L01 gene [Source:MGI Symbol;Acc:MGI:2443110]
ENSMUSG00000026620	372.27	184.13	1.0131	4.7785e-07	1.3882e-05	396	319	365	276	142	206	232	245	Mark1	MAP/microtubule affinity regulating kinase 1 [Source:MGI Symbol;Acc:MGI:2664902]
ENSMUSG00000025059	1322.17	261.76	2.3366	4.8055e-07	1.3946e-05	2482	499	788	919	285	353	303	211	Gk	glycerol kinase [Source:MGI Symbol;Acc:MGI:106594]
ENSMUSG00000068735	2242.81	968.12	1.2128	4.8737e-07	1.413e-05	1506	1653	2862	2303	1203	869	1065	1073	Trp53i11	transformation related protein 53 inducible protein 11 [Source:MGI Symbol;Acc:MGI:2670995]
ENSMUSG00000041872	29.46	0.63	5.4644	4.8899e-07	1.4164e-05	44	9	10	42	0	2	1	0	Il17f	interleukin 17F [Source:MGI Symbol;Acc:MGI:2676631]
ENSMUSG00000025529	23.55	97.84	-2.0541	5.0709e-07	1.4631e-05	22	7	28	30	57	132	158	97	Zfp711	zinc finger protein 711 [Source:MGI Symbol;Acc:MGI:3045342]
ENSMUSG00000031972	826.79	1797.31	-1.1208	5.2259e-07	1.5048e-05	883	870	575	657	1678	2368	2126	1811	Acta1	actin, alpha 1, skeletal muscle [Source:MGI Symbol;Acc:MGI:87902]
ENSMUSG00000055301	26.27	112.72	-2.1008	5.4973e-07	1.5815e-05	8	39	25	25	59	141	179	134	Adh7	alcohol dehydrogenase 7 (class IV), mu or sigma polypeptide [Source:MGI Symbol;Acc:MGI:87926]
ENSMUSG00000074505	34.48	110.57	-1.6862	5.6199e-07	1.612e-05	32	29	33	32	55	182	163	105	Fat3	FAT atypical cadherin 3 [Source:MGI Symbol;Acc:MGI:2444314]
ENSMUSG00000078954	621.95	252.85	1.2973	5.6879e-07	1.6284e-05	705	631	395	508	211	336	335	248	Arhgap8	Rho GTPase activating protein 8 [Source:MGI Symbol;Acc:MGI:1920417]
ENSMUSG00000034686	82.53	30.36	1.447	5.7015e-07	1.6307e-05	81	86	61	71	35	36	38	24	Prr7	proline rich 7 (synaptic) [Source:MGI Symbol;Acc:MGI:3487246]
ENSMUSG00000033857	141.99	372.31	-1.3873	5.8314e-07	1.6646e-05	86	114	186	142	482	356	322	454	Engase	endo-beta-N-acetylglucosaminidase [Source:MGI Symbol;Acc:MGI:2443788]
ENSMUSG00000085171	15.65	47.42	-1.6094	5.9141e-07	1.685e-05	17	14	16	10	35	58	59	61	D830026I12Rik	RIKEN cDNA D830026I12 gene [Source:MGI Symbol;Acc:MGI:2442531]
ENSMUSG00000021097	67.4	532.23	-2.9825	5.9279e-07	1.6873e-05	61	88	49	46	48	1005	619	819	Clmn	calmin [Source:MGI Symbol;Acc:MGI:2136957]
ENSMUSG00000028793	4254.33	1519.1	1.4861	6.0372e-07	1.7167e-05	3297	2255	5386	4836	2069	1492	1504	1495	Rnf19b	ring finger protein 19B [Source:MGI Symbol;Acc:MGI:1922484]
ENSMUSG00000000197	4.99	26.84	-2.4458	6.112e-07	1.7363e-05	7	5	5	1	22	34	32	32	Nalcn	sodium leak channel, non-selective [Source:MGI Symbol;Acc:MGI:2444306]
ENSMUSG00000003411	13.42	54.21	-2.0214	6.2186e-07	1.7649e-05	16	6	14	13	30	56	81	79	Rab3b	RAB3B, member RAS oncogene family [Source:MGI Symbol;Acc:MGI:1917158]
ENSMUSG00000074482	142.68	52.46	1.4376	6.3712e-07	1.8065e-05	159	90	161	112	35	81	53	68	Gm16589	predicted gene 16589 [Source:MGI Symbol;Acc:MGI:4418561]
ENSMUSG00000082154	53.18	11.52	2.2127	6.434e-07	1.8226e-05	36	20	79	64	11	12	13	15	Gm16464	predicted gene 16464 [Source:MGI Symbol;Acc:MGI:3643716]
ENSMUSG00000021363	135.09	46.14	1.5548	6.5581e-07	1.8542e-05	151	97	109	133	58	65	46	32	Mak	male germ cell-associated kinase [Source:MGI Symbol;Acc:MGI:96913]
ENSMUSG00000050108	25.54	109.6	-2.0958	6.6468e-07	1.8757e-05	9	25	40	22	53	134	191	122	Bpifc	BPI fold containing family C [Source:MGI Symbol;Acc:MGI:3026884]
ENSMUSG00000030956	207.36	480.67	-1.2124	6.7017e-07	1.8894e-05	183	152	273	158	383	505	492	769	Fam53b	family with sequence similarity 53, member B [Source:MGI Symbol;Acc:MGI:1925188]
ENSMUSG00000043740	105.3	32.32	1.7027	6.7804e-07	1.9097e-05	125	58	133	70	29	49	29	37	B430306N03Rik	RIKEN cDNA B430306N03 gene [Source:MGI Symbol;Acc:MGI:2443478]
ENSMUSG00000030739	2248.65	6265.3	-1.4784	6.7885e-07	1.9102e-05	1451	3115	1508	2107	4332	7499	9670	6724	Myh14	myosin, heavy polypeptide 14 [Source:MGI Symbol;Acc:MGI:1919210]
ENSMUSG00000015224	15.63	52.93	-1.7681	6.7978e-07	1.911e-05	18	12	17	10	35	75	52	77	Cyp2j9	cytochrome P450, family 2, subfamily j, polypeptide 9 [Source:MGI Symbol;Acc:MGI:1921769]
ENSMUSG00000053137	1308.65	338.86	1.9487	6.8425e-07	1.9218e-05	1972	1328	606	737	237	481	387	422	Mapk11	mitogen-activated protein kinase 11 [Source:MGI Symbol;Acc:MGI:1338024]
ENSMUSG00000007476	453.07	221.38	1.0337	6.8619e-07	1.9254e-05	393	509	435	317	220	225	237	296	Lrrc8a	leucine rich repeat containing 8A VRAC subunit A [Source:MGI Symbol;Acc:MGI:2652847]
ENSMUSG00000030137	597.78	153.87	1.9571	7.0924e-07	1.9882e-05	1009	412	425	284	132	185	158	211	Tuba8	tubulin, alpha 8 [Source:MGI Symbol;Acc:MGI:1858225]
ENSMUSG00000075602	42384.9	20890.2	1.0208	7.1254e-07	1.9955e-05	37365	42918	37036	37206	26517	21087	21640	21501	Ly6a	lymphocyte antigen 6 complex, locus A [Source:MGI Symbol;Acc:MGI:107527]
ENSMUSG00000078994	201.99	94.56	1.09	7.416e-07	2.073e-05	188	170	192	188	66	131	90	139	Zfp429	zinc finger protein 429 [Source:MGI Symbol;Acc:MGI:1920057]
ENSMUSG00000027318	398.02	1822.86	-2.1957	7.4651e-07	2.0828e-05	243	770	226	199	1018	2436	2450	2377	Adam33	a disintegrin and metallopeptidase domain 33 [Source:MGI Symbol;Acc:MGI:1341813]
ENSMUSG00000115219	163.91	53.92	1.6028	7.4823e-07	2.0856e-05	194	188	122	86	52	70	63	54	Eef1akmt4	EEF1A lysine methyltransferase 4 [Source:MGI Symbol;Acc:MGI:5903914]
ENSMUSG00000015340	1108.7	448.79	1.3053	7.6976e-07	2.1396e-05	981	615	1523	989	475	624	479	401	Cybb	cytochrome b-245, beta polypeptide [Source:MGI Symbol;Acc:MGI:88574]
ENSMUSG00000038319	109.24	353.17	-1.6944	7.7222e-07	2.1444e-05	70	178	79	70	244	447	408	492	Kcnh2	potassium voltage-gated channel, subfamily H (eag-related), member 2 [Source:MGI Symbol;Acc:MGI:1341722]
ENSMUSG00000021280	83.28	31.37	1.4037	7.8472e-07	2.175e-05	97	61	83	62	26	31	41	42	Exoc3l4	exocyst complex component 3-like 4 [Source:MGI Symbol;Acc:MGI:1921363]
ENSMUSG00000050520	63.79	317.56	-2.3183	7.9198e-07	2.1931e-05	53	104	39	34	101	498	473	393	Cldn8	claudin 8 [Source:MGI Symbol;Acc:MGI:1859286]
ENSMUSG00000029752	2808.18	811.94	1.7903	7.9998e-07	2.2111e-05	3781	3168	1606	1468	991	859	937	752	Asns	asparagine synthetase [Source:MGI Symbol;Acc:MGI:1350929]
ENSMUSG00000070304	13.16	50.48	-1.9312	7.9945e-07	2.2111e-05	7	16	19	7	39	52	55	80	Scn2b	sodium channel, voltage-gated, type II, beta [Source:MGI Symbol;Acc:MGI:106921]
ENSMUSG00000044788	139.93	599.42	-2.0974	8.0589e-07	2.2254e-05	109	40	235	141	603	599	461	982	Fads6	fatty acid desaturase domain family, member 6 [Source:MGI Symbol;Acc:MGI:3039592]
ENSMUSG00000047037	76.3	153.68	-1.011	8.0702e-07	2.2264e-05	67	58	91	65	116	207	180	187	Nipa1	non imprinted in Prader-Willi/Angelman syndrome 1 homolog (human) [Source:MGI Symbol;Acc:MGI:2442058]
ENSMUSG00000031652	2274.77	1034.2	1.137	8.2605e-07	2.2768e-05	2577	1403	2092	2206	901	1335	1002	1371	N4bp1	NEDD4 binding protein 1 [Source:MGI Symbol;Acc:MGI:2136825]
ENSMUSG00000108801	43.53	12.79	1.7612	8.2918e-07	2.2833e-05	49	37	39	33	11	16	10	20	Gm39090	predicted gene, 39090 [Source:MGI Symbol;Acc:MGI:5621975]
ENSMUSG00000117239	25.24	2.79	3.2107	8.3187e-07	2.2886e-05	23	14	41	16	4	4	0	4	Gpr31c	G protein-coupled receptor 31, D17Leh66c region [Source:MGI Symbol;Acc:MGI:1354371]
ENSMUSG00000025915	696.43	1397.01	-1.0042	8.441e-07	2.3179e-05	718	470	803	563	1348	1498	1448	1890	Sgk3	serum/glucocorticoid regulated kinase 3 [Source:MGI Symbol;Acc:MGI:2182368]
ENSMUSG00000071350	341.18	146.08	1.2256	8.5034e-07	2.3329e-05	289	184	450	341	148	163	172	162	Setdb2	SET domain, bifurcated 2 [Source:MGI Symbol;Acc:MGI:2685139]
ENSMUSG00000118433	10	0	5.9109	8.61e-07	2.3599e-05	9	7	14	7	0	0	0	0	Gm50471	predicted gene, 50471 [Source:MGI Symbol;Acc:MGI:6324741]
ENSMUSG00000030365	8.8	37.03	-2.0582	8.9987e-07	2.4551e-05	5	6	14	8	29	47	57	33	Clec2i	C-type lectin domain family 2, member i [Source:MGI Symbol;Acc:MGI:2136650]
ENSMUSG00000024922	211.53	80.02	1.4084	9.0917e-07	2.4759e-05	169	150	182	274	108	87	73	78	Ovol1	ovo like zinc finger 1 [Source:MGI Symbol;Acc:MGI:1330290]
ENSMUSG00000097885	42.3	94.88	-1.1592	9.3611e-07	2.5469e-05	24	38	52	43	82	118	112	111	5031434O11Rik	RIKEN cDNA 5031434O11 gene [Source:MGI Symbol;Acc:MGI:1923230]
ENSMUSG00000023473	220.63	43.64	2.3413	9.5237e-07	2.5888e-05	93	70	366	306	51	54	51	35	Celsr3	cadherin, EGF LAG seven-pass G-type receptor 3 [Source:MGI Symbol;Acc:MGI:1858236]
ENSMUSG00000052560	1145.1	565.52	1.0181	9.5735e-07	2.6e-05	1232	748	1295	918	574	637	681	605	Cpne8	copine VIII [Source:MGI Symbol;Acc:MGI:1914121]
ENSMUSG00000087206	16.62	1.6	3.3951	9.6158e-07	2.6091e-05	12	16	16	17	2	3	1	1	Gm16175	predicted gene 16175 [Source:MGI Symbol;Acc:MGI:3801805]
ENSMUSG00000033987	274.22	97.06	1.5008	9.6315e-07	2.6109e-05	207	159	280	365	109	116	131	70	Dnah17	dynein, axonemal, heavy chain 17 [Source:MGI Symbol;Acc:MGI:1917176]
ENSMUSG00000078349	332.26	108.76	1.6131	9.6962e-07	2.6237e-05	183	173	427	457	116	139	107	117	AW011738	expressed sequence AW011738 [Source:MGI Symbol;Acc:MGI:2140540]
ENSMUSG00000057182	13.72	44.2	-1.6742	9.8296e-07	2.6573e-05	10	9	19	13	46	58	41	50	Scn3a	sodium channel, voltage-gated, type III, alpha [Source:MGI Symbol;Acc:MGI:98249]
ENSMUSG00000024247	1683.35	703.67	1.2589	1.0572e-06	2.8529e-05	1092	987	2187	1998	747	765	733	852	Pkdcc	protein kinase domain containing, cytoplasmic [Source:MGI Symbol;Acc:MGI:2147077]
ENSMUSG00000021958	481.83	184.66	1.3853	1.0766e-06	2.9024e-05	611	323	420	390	234	173	205	190	Pinx1	PIN2/TERF1 interacting, telomerase inhibitor 1 [Source:MGI Symbol;Acc:MGI:1919650]
ENSMUSG00000052477	17.87	1.56	3.509	1.0813e-06	2.9126e-05	16	12	23	15	1	0	2	4	C130026I21Rik	RIKEN cDNA C130026I21 gene [Source:MGI Symbol;Acc:MGI:3612702]
ENSMUSG00000021259	18.01	57.88	-1.6787	1.1684e-06	3.1386e-05	7	21	22	17	39	71	76	75	Cyp46a1	cytochrome P450, family 46, subfamily a, polypeptide 1 [Source:MGI Symbol;Acc:MGI:1341877]
ENSMUSG00000049119	54.91	127.31	-1.2181	1.1919e-06	3.1989e-05	57	52	54	37	95	132	163	181	Fam110b	family with sequence similarity 110, member B [Source:MGI Symbol;Acc:MGI:1916593]
ENSMUSG00000028525	1372.63	559.5	1.2947	1.2319e-06	3.2941e-05	1337	695	1768	1266	491	743	744	516	Pde4b	phosphodiesterase 4B, cAMP specific [Source:MGI Symbol;Acc:MGI:99557]
ENSMUSG00000004151	16.97	58.48	-1.7699	1.2308e-06	3.2941e-05	8	9	28	19	46	75	73	68	Etv1	ets variant 1 [Source:MGI Symbol;Acc:MGI:99254]
ENSMUSG00000040525	1044.79	414.36	1.3347	1.2403e-06	3.3106e-05	1292	942	724	802	499	501	400	409	Cblc	Casitas B-lineage lymphoma c [Source:MGI Symbol;Acc:MGI:1931457]
ENSMUSG00000009378	15.86	58.08	-1.8774	1.2475e-06	3.3268e-05	12	19	15	12	38	69	49	106	Slc16a12	solute carrier family 16 (monocarboxylic acid transporters), member 12 [Source:MGI Symbol;Acc:MGI:2147716]
ENSMUSG00000031297	89.76	35.4	1.3406	1.2685e-06	3.3788e-05	93	84	77	72	33	38	30	56	Slc7a3	solute carrier family 7 (cationic amino acid transporter, y+ system), member 3 [Source:MGI Symbol;Acc:MGI:1100521]
ENSMUSG00000052135	14.44	51.99	-1.8423	1.2692e-06	3.3788e-05	14	14	18	7	65	51	43	67	Foxo6	forkhead box O6 [Source:MGI Symbol;Acc:MGI:2676586]
ENSMUSG00000083161	82.98	31.56	1.4062	1.2731e-06	3.386e-05	84	60	92	68	41	39	31	26	Gm11427	predicted gene 11427 [Source:MGI Symbol;Acc:MGI:3651774]
ENSMUSG00000030671	355.92	854.2	-1.2618	1.3334e-06	3.5338e-05	228	209	535	359	748	995	1001	1060	Pde3b	phosphodiesterase 3B, cGMP-inhibited [Source:MGI Symbol;Acc:MGI:1333863]
ENSMUSG00000030255	126.87	326.03	-1.3647	1.3607e-06	3.6029e-05	125	148	105	82	192	412	461	413	Sspn	sarcospan [Source:MGI Symbol;Acc:MGI:1353511]
ENSMUSG00000022199	140.26	321.61	-1.1981	1.3796e-06	3.6497e-05	88	173	102	149	276	392	343	423	Slc22a17	solute carrier family 22 (organic cation transporter), member 17 [Source:MGI Symbol;Acc:MGI:1926225]
ENSMUSG00000020181	391.21	174.31	1.1681	1.3828e-06	3.6548e-05	380	214	465	381	190	194	189	193	Nav3	neuron navigator 3 [Source:MGI Symbol;Acc:MGI:2183703]
ENSMUSG00000085786	27.42	6.4	2.0785	1.3867e-06	3.6618e-05	21	31	22	26	4	10	7	8	Gm15987	predicted gene 15987 [Source:MGI Symbol;Acc:MGI:3801849]
ENSMUSG00000071311	19.61	1.88	3.4337	1.4033e-06	3.7024e-05	9	15	23	26	3	3	0	2	Gpr31b	G protein-coupled receptor 31, D17Leh66b region [Source:MGI Symbol;Acc:MGI:1354372]
ENSMUSG00000035356	4548.59	1351.23	1.7516	1.4495e-06	3.8209e-05	4058	2665	4639	5344	2297	1207	1253	953	Nfkbiz	nuclear factor of kappa light polypeptide gene enhancer in B cells inhibitor, zeta [Source:MGI Symbol;Acc:MGI:1931595]
ENSMUSG00000025481	2429.52	490.38	2.3088	1.4524e-06	3.8251e-05	4353	2275	849	1057	552	572	545	482	Urah	urate (5-hydroxyiso-) hydrolase [Source:MGI Symbol;Acc:MGI:1916142]
ENSMUSG00000027333	2167.73	612.91	1.8223	1.4554e-06	3.8297e-05	3667	1161	1365	1527	541	709	679	799	Smox	spermine oxidase [Source:MGI Symbol;Acc:MGI:2445356]
ENSMUSG00000027840	48.4	132.98	-1.4617	1.5212e-06	3.992e-05	52	32	52	41	82	218	177	126	Wnt2b	wingless-type MMTV integration site family, member 2B [Source:MGI Symbol;Acc:MGI:1261834]
ENSMUSG00000099241	20.1	2.53	3.008	1.5203e-06	3.992e-05	21	15	16	21	3	0	5	3	Gvin-ps2	GTPase, very large interferon inducible, pseudogene 2 [Source:MGI Symbol;Acc:MGI:5011037]
ENSMUSG00000027070	59	185.91	-1.6597	1.5358e-06	4.0196e-05	63	68	55	28	112	196	224	309	Lrp2	low density lipoprotein receptor-related protein 2 [Source:MGI Symbol;Acc:MGI:95794]
ENSMUSG00000032006	166.6	378.69	-1.1871	1.5445e-06	4.0389e-05	169	169	155	113	234	491	519	470	Pdgfd	platelet-derived growth factor, D polypeptide [Source:MGI Symbol;Acc:MGI:1919035]
ENSMUSG00000045917	175.22	419.16	-1.2572	1.555e-06	4.0592e-05	150	155	210	130	450	370	360	661	Tmem268	transmembrane protein 268 [Source:MGI Symbol;Acc:MGI:1913920]
ENSMUSG00000107061	28.27	6.48	2.1472	1.555e-06	4.0592e-05	28	20	24	31	9	9	5	5	Gm19590	predicted gene, 19590 [Source:MGI Symbol;Acc:MGI:5011775]
ENSMUSG00000032860	419.7	151.13	1.4736	1.5932e-06	4.1553e-05	395	193	586	381	133	221	186	134	P2ry2	purinergic receptor P2Y, G-protein coupled 2 [Source:MGI Symbol;Acc:MGI:105107]
ENSMUSG00000047751	125.4	360.4	-1.5199	1.6499e-06	4.2918e-05	57	126	161	123	484	381	398	296	Utf1	undifferentiated embryonic cell transcription factor 1 [Source:MGI Symbol;Acc:MGI:1276125]
ENSMUSG00000009356	75.44	14.44	2.4104	1.7314e-06	4.4998e-05	70	57	96	55	28	8	19	5	Lpo	lactoperoxidase [Source:MGI Symbol;Acc:MGI:1923363]
ENSMUSG00000008193	25.78	6.23	2.0747	1.7509e-06	4.5386e-05	22	20	31	22	8	5	7	7	Spib	Spi-B transcription factor (Spi-1/PU.1 related) [Source:MGI Symbol;Acc:MGI:892986]
ENSMUSG00000031808	354.68	744.41	-1.0691	1.757e-06	4.5503e-05	204	342	385	380	598	824	795	1111	Slc27a1	solute carrier family 27 (fatty acid transporter), member 1 [Source:MGI Symbol;Acc:MGI:1347098]
ENSMUSG00000021062	1094.03	381.68	1.5183	1.8067e-06	4.6648e-05	1519	811	966	649	260	598	395	470	Rab15	RAB15, member RAS oncogene family [Source:MGI Symbol;Acc:MGI:1916865]
ENSMUSG00000062585	3.78	24.89	-2.7082	1.8307e-06	4.7165e-05	3	5	6	0	25	29	35	21	Cnr2	cannabinoid receptor 2 (macrophage) [Source:MGI Symbol;Acc:MGI:104650]
ENSMUSG00000095681	18.76	1.34	3.7943	1.8295e-06	4.7165e-05	13	22	9	24	1	0	2	3	Gm8281	predicted gene, 8281 [Source:MGI Symbol;Acc:MGI:3647811]
ENSMUSG00000109036	31.7	4.92	2.6881	1.889e-06	4.8583e-05	21	10	50	38	4	6	7	5	2210406H18Rik	RIKEN cDNA 2210406H18 gene [Source:MGI Symbol;Acc:MGI:1917383]
ENSMUSG00000066129	8.48	39.51	-2.2001	1.9137e-06	4.9133e-05	4	4	14	10	35	50	62	29	Kndc1	kinase non-catalytic C-lobe domain (KIND) containing 1 [Source:MGI Symbol;Acc:MGI:1923734]
ENSMUSG00000058966	8.96	33.52	-1.8971	1.9279e-06	4.9454e-05	7	10	11	5	34	39	30	45	Tlcd3b	TLC domain containing 3B [Source:MGI Symbol;Acc:MGI:1916202]
ENSMUSG00000032741	771.7	1699.69	-1.1385	1.947e-06	4.9899e-05	491	514	1091	782	1617	1910	1733	2272	Tpcn1	two pore channel 1 [Source:MGI Symbol;Acc:MGI:2182472]
ENSMUSG00000034394	919.35	181.85	2.3389	1.9858e-06	5.0807e-05	991	309	650	1393	254	177	275	78	Lif	leukemia inhibitory factor [Source:MGI Symbol;Acc:MGI:96787]
ENSMUSG00000020829	57.3	131.56	-1.202	2.031e-06	5.1918e-05	47	72	53	37	110	139	172	166	Slc46a1	solute carrier family 46, member 1 [Source:MGI Symbol;Acc:MGI:1098733]
ENSMUSG00000031147	3.84	25.89	-2.7627	2.047e-06	5.2236e-05	1	7	2	4	17	39	23	38	Magix	MAGI family member, X-linked [Source:MGI Symbol;Acc:MGI:1859644]
ENSMUSG00000039206	144.79	368.29	-1.3438	2.0763e-06	5.2895e-05	98	76	203	163	415	422	377	401	Daglb	diacylglycerol lipase, beta [Source:MGI Symbol;Acc:MGI:2442032]
ENSMUSG00000040016	508.15	203.39	1.3202	2.1115e-06	5.3607e-05	376	704	353	412	171	201	283	252	Ptger3	prostaglandin E receptor 3 (subtype EP3) [Source:MGI Symbol;Acc:MGI:97795]
ENSMUSG00000027956	153.59	320.34	-1.0589	2.2016e-06	5.556e-05	118	94	193	164	269	396	337	428	Tmem144	transmembrane protein 144 [Source:MGI Symbol;Acc:MGI:1917902]
ENSMUSG00000034157	1251.5	2791.16	-1.157	2.2052e-06	5.5603e-05	610	1322	1478	1233	2137	3486	3382	3513	Cipc	CLOCK interacting protein, circadian [Source:MGI Symbol;Acc:MGI:1919185]
ENSMUSG00000030827	21.4	0.27	6.2797	2.2359e-06	5.6282e-05	31	34	3	7	1	0	0	0	Fgf21	fibroblast growth factor 21 [Source:MGI Symbol;Acc:MGI:1861377]
ENSMUSG00000024978	941.67	2079.16	-1.1428	2.2595e-06	5.6779e-05	607	1083	966	807	1265	2620	2633	2895	Gpam	glycerol-3-phosphate acyltransferase, mitochondrial [Source:MGI Symbol;Acc:MGI:109162]
ENSMUSG00000049625	38.74	95.94	-1.3044	2.3436e-06	5.8694e-05	35	20	47	41	91	98	103	133	Tifab	TRAF-interacting protein with forkhead-associated domain, family member B [Source:MGI Symbol;Acc:MGI:2385852]
ENSMUSG00000034848	150.89	306.09	-1.0184	2.43e-06	6.0703e-05	116	139	163	137	333	299	276	436	Ttc21b	tetratricopeptide repeat domain 21B [Source:MGI Symbol;Acc:MGI:1920918]
ENSMUSG00000004864	1827.58	755.95	1.2738	2.4549e-06	6.1171e-05	2193	1834	1393	1168	887	826	854	738	Mapk13	mitogen-activated protein kinase 13 [Source:MGI Symbol;Acc:MGI:1346864]
ENSMUSG00000020102	63.68	149.9	-1.2404	2.6733e-06	6.6277e-05	50	78	41	62	109	193	189	183	Slc16a7	solute carrier family 16 (monocarboxylic acid transporters), member 7 [Source:MGI Symbol;Acc:MGI:1330284]
ENSMUSG00000025092	652.23	299.28	1.122	2.7096e-06	6.7121e-05	655	634	664	426	187	394	374	399	Hspa12a	heat shock protein 12A [Source:MGI Symbol;Acc:MGI:1920692]
ENSMUSG00000063779	143.51	26.48	2.4414	2.7634e-06	6.8395e-05	277	49	94	89	34	31	26	24	Chil4	chitinase-like 4 [Source:MGI Symbol;Acc:MGI:1341098]
ENSMUSG00000117814	205.06	82.03	1.3281	2.782e-06	6.8799e-05	125	221	206	203	110	91	92	62	Gm50431	predicted gene, 50431 [Source:MGI Symbol;Acc:MGI:6303362]
ENSMUSG00000074647	27.24	4.75	2.4815	2.8533e-06	7.0444e-05	34	16	27	22	1	5	7	9	Fam83c	family with sequence similarity 83, member C [Source:MGI Symbol;Acc:MGI:1918655]
ENSMUSG00000042821	272.94	116.6	1.2308	2.8966e-06	7.1396e-05	228	325	255	188	149	107	122	128	Snai1	snail family zinc finger 1 [Source:MGI Symbol;Acc:MGI:98330]
ENSMUSG00000050558	34.2	2.23	3.9306	2.9574e-06	7.2773e-05	55	28	36	4	2	6	1	1	Prokr2	prokineticin receptor 2 [Source:MGI Symbol;Acc:MGI:2181363]
ENSMUSG00000037660	24.34	99.54	-2.0396	2.9637e-06	7.2867e-05	33	20	24	11	41	169	139	108	Gdf7	growth differentiation factor 7 [Source:MGI Symbol;Acc:MGI:95690]
ENSMUSG00000026726	24.59	102.71	-2.061	2.979e-06	7.3182e-05	26	13	37	15	68	66	129	199	Cubn	cubilin (intrinsic factor-cobalamin receptor) [Source:MGI Symbol;Acc:MGI:1931256]
ENSMUSG00000027219	940.39	260.32	1.8545	2.9891e-06	7.3307e-05	921	352	1388	829	390	239	200	285	Slc28a2	solute carrier family 28 (sodium-coupled nucleoside transporter), member 2 [Source:MGI Symbol;Acc:MGI:1913105]
ENSMUSG00000042793	274.16	965.1	-1.816	3.0449e-06	7.4615e-05	171	424	283	127	478	1332	1376	1216	Lgr6	leucine-rich repeat-containing G protein-coupled receptor 6 [Source:MGI Symbol;Acc:MGI:2441805]
ENSMUSG00000040747	1228.63	518.1	1.2466	3.0506e-06	7.4692e-05	1206	667	1629	1034	616	570	570	507	Cd53	CD53 antigen [Source:MGI Symbol;Acc:MGI:88341]
ENSMUSG00000024663	302.31	668.3	-1.1454	3.1341e-06	7.6612e-05	311	328	288	172	555	737	749	942	Rab3il1	RAB3A interacting protein (rabin3)-like 1 [Source:MGI Symbol;Acc:MGI:1922010]
ENSMUSG00000057367	1688.16	645.48	1.3872	3.1459e-06	7.6836e-05	913	935	2182	2271	592	782	737	757	Birc2	baculoviral IAP repeat-containing 2 [Source:MGI Symbol;Acc:MGI:1197009]
ENSMUSG00000079017	3208.59	1310.72	1.2917	3.2679e-06	7.9617e-05	3091	4156	2413	1945	1462	1271	1527	1487	Ifi27l2a	interferon, alpha-inducible protein 27 like 2A [Source:MGI Symbol;Acc:MGI:1924183]
ENSMUSG00000110144	37.1	9.35	1.9829	3.3124e-06	8.0636e-05	24	22	36	55	7	13	10	12	Gm45564	predicted gene 45564 [Source:MGI Symbol;Acc:MGI:5791400]
ENSMUSG00000032411	189.66	444.51	-1.227	3.3267e-06	8.0918e-05	86	182	248	191	379	533	598	473	Tfdp2	transcription factor Dp 2 [Source:MGI Symbol;Acc:MGI:107167]
ENSMUSG00000028542	421.72	160.2	1.3955	3.4252e-06	8.3244e-05	553	410	252	295	149	185	173	204	Slc6a9	solute carrier family 6 (neurotransmitter transporter, glycine), member 9 [Source:MGI Symbol;Acc:MGI:95760]
ENSMUSG00000006362	127.5	262.78	-1.0458	3.4308e-06	8.3312e-05	119	142	103	99	228	280	275	387	Cbfa2t3	CBFA2/RUNX1 translocation partner 3 [Source:MGI Symbol;Acc:MGI:1338013]
ENSMUSG00000029287	3242.25	7127.73	-1.1363	3.462e-06	8.4002e-05	2450	2349	4985	2297	5666	8854	9231	8162	Tgfbr3	transforming growth factor, beta receptor III [Source:MGI Symbol;Acc:MGI:104637]
ENSMUSG00000043164	31.9	6.38	2.3267	3.4823e-06	8.4355e-05	45	22	28	20	7	6	11	4	Tmem212	transmembrane protein 212 [Source:MGI Symbol;Acc:MGI:2685410]
ENSMUSG00000118672	4225.74	905.66	2.2221	3.4818e-06	8.4355e-05	7748	1943	3063	2282	877	1659	956	533	Muc4	mucin 4 [Source:NCBI gene (formerly Entrezgene);Acc:140474]
ENSMUSG00000027073	20.65	4.01	2.3556	3.4853e-06	8.436e-05	15	22	23	16	3	4	7	4	Prg2	proteoglycan 2, bone marrow [Source:MGI Symbol;Acc:MGI:103294]
ENSMUSG00000050164	20.16	98.07	-2.2753	3.4979e-06	8.4596e-05	7	25	36	8	56	132	88	169	Mchr1	melanin-concentrating hormone receptor 1 [Source:MGI Symbol;Acc:MGI:2180756]
ENSMUSG00000022246	1780.64	852.59	1.0633	3.5589e-06	8.6001e-05	1241	1310	2107	1932	1043	831	819	1020	Rai14	retinoic acid induced 14 [Source:MGI Symbol;Acc:MGI:1922896]
ENSMUSG00000097415	650.89	300.51	1.117	3.5851e-06	8.6423e-05	485	432	811	683	366	366	303	276	AU020206	expressed sequence AU020206 [Source:MGI Symbol;Acc:MGI:2142134]
ENSMUSG00000028943	37.77	107.37	-1.5003	3.591e-06	8.6493e-05	19	36	42	43	129	130	134	76	Espn	espin [Source:MGI Symbol;Acc:MGI:1861630]
ENSMUSG00000027993	508.02	1069.44	-1.0735	3.691e-06	8.8759e-05	263	489	601	532	819	1446	1304	1230	Trim2	tripartite motif-containing 2 [Source:MGI Symbol;Acc:MGI:1933163]
ENSMUSG00000016179	23.83	194.44	-3.0301	3.7088e-06	8.9048e-05	11	46	20	10	27	265	426	188	Camk1g	calcium/calmodulin-dependent protein kinase I gamma [Source:MGI Symbol;Acc:MGI:2388073]
ENSMUSG00000044748	1985.67	453.07	2.133	3.7091e-06	8.9048e-05	1288	1545	2300	2218	932	263	425	248	Defb1	defensin beta 1 [Source:MGI Symbol;Acc:MGI:1096878]
ENSMUSG00000038567	173.25	22.89	2.9223	4.0085e-06	9.5848e-05	25	76	337	226	23	17	46	15	Cyp24a1	cytochrome P450, family 24, subfamily a, polypeptide 1 [Source:MGI Symbol;Acc:MGI:88593]
ENSMUSG00000002228	206.21	85.97	1.2681	4.0433e-06	9.6523e-05	225	151	208	168	118	87	75	91	Ppm1j	protein phosphatase 1J [Source:MGI Symbol;Acc:MGI:1919137]
ENSMUSG00000031609	297.57	136.96	1.1223	4.2289e-06	0.00010071	270	172	332	321	155	141	136	168	Sap30	sin3 associated polypeptide [Source:MGI Symbol;Acc:MGI:1929129]
ENSMUSG00000074207	368.93	1558	-2.0784	4.3367e-06	0.00010319	169	667	346	170	783	1842	2688	1785	Adh1	alcohol dehydrogenase 1 (class I) [Source:MGI Symbol;Acc:MGI:87921]
ENSMUSG00000032609	368.39	813.64	-1.1439	4.3481e-06	0.0001033	271	497	288	285	624	936	1016	1071	Klhdc8b	kelch domain containing 8B [Source:MGI Symbol;Acc:MGI:1925517]
ENSMUSG00000025089	90.4	29.34	1.6183	4.3474e-06	0.0001033	74	55	143	65	17	34	43	39	Gfra1	glial cell line derived neurotrophic factor family receptor alpha 1 [Source:MGI Symbol;Acc:MGI:1100842]
ENSMUSG00000058145	11.54	43.66	-1.9314	4.4269e-06	0.00010492	12	13	12	5	22	59	57	61	Adamts17	a disintegrin-like and metallopeptidase (reprolysin type) with thrombospondin type 1 motif, 17 [Source:MGI Symbol;Acc:MGI:3588195]
ENSMUSG00000028399	50.51	124.65	-1.3093	4.49e-06	0.00010624	51	44	47	42	71	166	194	135	Ptprd	protein tyrosine phosphatase, receptor type, D [Source:MGI Symbol;Acc:MGI:97812]
ENSMUSG00000031155	149.48	71.91	1.0585	4.5404e-06	0.00010735	122	96	166	167	71	82	71	94	Pim2	proviral integration site 2 [Source:MGI Symbol;Acc:MGI:97587]
ENSMUSG00000028036	59.55	14.04	2.0773	4.5731e-06	0.00010804	48	92	36	39	10	10	18	25	Ptgfr	prostaglandin F receptor [Source:MGI Symbol;Acc:MGI:97796]
ENSMUSG00000091191	152.56	28.57	2.4144	4.8216e-06	0.00011346	47	62	142	318	19	39	34	37	Gm17334	predicted gene, 17334 [Source:MGI Symbol;Acc:MGI:4936968]
ENSMUSG00000028186	97.34	6.47	3.9267	4.8606e-06	0.00011419	254	27	42	14	12	2	6	7	Uox	urate oxidase [Source:MGI Symbol;Acc:MGI:98907]
ENSMUSG00000039628	28.38	129.7	-2.1922	4.8811e-06	0.00011458	7	57	22	18	111	185	127	156	Hs3st6	heparan sulfate (glucosamine) 3-O-sulfotransferase 6 [Source:MGI Symbol;Acc:MGI:3580487]
ENSMUSG00000000037	8.57	32.05	-1.8918	4.8876e-06	0.00011464	5	8	13	6	23	34	42	45	Scml2	Scm polycomb group protein like 2 [Source:MGI Symbol;Acc:MGI:1340042]
ENSMUSG00000054871	84.29	183.81	-1.1266	4.9143e-06	0.00011509	72	93	94	50	136	241	246	203	Tmem158	transmembrane protein 158 [Source:MGI Symbol;Acc:MGI:1919559]
ENSMUSG00000096576	21.69	0.85	4.6043	4.9119e-06	0.00011509	45	12	9	10	0	1	1	2	Oog1	oogenesin 1 [Source:MGI Symbol;Acc:MGI:2679150]
ENSMUSG00000027230	1688.41	631.63	1.418	4.977e-06	0.00011647	2009	2018	1041	987	483	783	803	764	Creb3l1	cAMP responsive element binding protein 3-like 1 [Source:MGI Symbol;Acc:MGI:1347062]
ENSMUSG00000020297	3.87	23.96	-2.6493	5.0339e-06	0.0001177	5	2	3	4	12	23	35	39	Nsg2	neuron specific gene family member 2 [Source:MGI Symbol;Acc:MGI:1202070]
ENSMUSG00000097077	24.17	4.53	2.3796	5.0961e-06	0.00011888	15	22	23	29	1	7	4	9	Gm16712	predicted gene, 16712 [Source:MGI Symbol;Acc:MGI:4439636]
ENSMUSG00000034771	101.24	244.41	-1.2746	5.1041e-06	0.00011895	81	141	71	74	182	321	315	280	Tle2	transducin-like enhancer of split 2 [Source:MGI Symbol;Acc:MGI:104635]
ENSMUSG00000039607	203.05	423.24	-1.0622	5.1072e-06	0.00011895	219	169	182	168	263	536	585	531	Rbms3	RNA binding motif, single stranded interacting protein [Source:MGI Symbol;Acc:MGI:2444477]
ENSMUSG00000024222	1196.26	2617.22	-1.1294	5.1195e-06	0.00011914	965	1055	1625	781	2096	2726	2733	4143	Fkbp5	FK506 binding protein 5 [Source:MGI Symbol;Acc:MGI:104670]
ENSMUSG00000029372	242.53	35.32	2.7816	5.201e-06	0.00012085	325	404	57	68	47	40	42	24	Ppbp	pro-platelet basic protein [Source:MGI Symbol;Acc:MGI:1888712]
ENSMUSG00000062760	6.92	36.12	-2.3966	5.2052e-06	0.00012085	6	9	4	6	22	22	61	58	Shisal1	shisa like 1 [Source:MGI Symbol;Acc:MGI:1919551]
ENSMUSG00000073409	358.25	147.52	1.2787	5.3676e-06	0.00012452	214	268	525	331	91	204	195	178	H2-Q6	histocompatibility 2, Q region locus 6 [Source:MGI Symbol;Acc:MGI:95935]
ENSMUSG00000034910	48.63	145.23	-1.5843	5.4189e-06	0.00012561	50	55	38	33	71	208	234	150	Pygo1	pygopus 1 [Source:MGI Symbol;Acc:MGI:1919385]
ENSMUSG00000076522	0	22.76	-6.8246	5.4253e-06	0.00012566	0	0	0	0	1	14	9	82	Igkv16-104	immunoglobulin kappa variable 16-104 [Source:MGI Symbol;Acc:MGI:2685913]
ENSMUSG00000062480	46.39	15.62	1.5597	5.4404e-06	0.00012582	55	38	40	35	12	16	24	18	Acat3	acetyl-Coenzyme A acetyltransferase 3 [Source:MGI Symbol;Acc:MGI:109182]
ENSMUSG00000048502	33.26	92.7	-1.4851	5.462e-06	0.00012622	32	38	31	20	59	109	156	95	Duxbl1	double homeobox B-like 1 [Source:MGI Symbol;Acc:MGI:1916048]
ENSMUSG00000050578	3065.22	77.95	5.2995	5.4846e-06	0.00012664	2566	1258	4431	3152	252	18	17	9	Mmp13	matrix metallopeptidase 13 [Source:MGI Symbol;Acc:MGI:1340026]
ENSMUSG00000025403	2396.29	1053.97	1.1852	5.5614e-06	0.00012824	2538	2735	1634	1736	1245	1139	1105	1116	Shmt2	serine hydroxymethyltransferase 2 (mitochondrial) [Source:MGI Symbol;Acc:MGI:1277989]
ENSMUSG00000033554	354.28	173.73	1.0283	5.622e-06	0.00012941	360	387	265	270	183	183	209	190	Dph5	diphthamide biosynthesis 5 [Source:MGI Symbol;Acc:MGI:1916990]
ENSMUSG00000117964	88.51	9.83	3.1696	5.6308e-06	0.00012951	20	12	155	151	8	13	12	11	Gm36043	predicted gene, 36043 [Source:MGI Symbol;Acc:MGI:5595202]
ENSMUSG00000030519	12.91	53.91	-2.0628	5.8409e-06	0.00013403	10	6	6	25	62	59	55	60	Apba2	amyloid beta (A4) precursor protein-binding, family A, member 2 [Source:MGI Symbol;Acc:MGI:1261791]
ENSMUSG00000027524	0	9.02	-5.4772	5.8542e-06	0.00013423	0	0	0	0	12	8	9	10	Edn3	endothelin 3 [Source:MGI Symbol;Acc:MGI:95285]
ENSMUSG00000052387	160.11	745.5	-2.2193	5.9528e-06	0.00013639	65	231	142	151	195	1229	1344	685	Trpm3	transient receptor potential cation channel, subfamily M, member 3 [Source:MGI Symbol;Acc:MGI:2443101]
ENSMUSG00000020598	43.34	91.92	-1.0775	5.9866e-06	0.00013695	28	33	56	44	83	120	105	101	Nrcam	neuronal cell adhesion molecule [Source:MGI Symbol;Acc:MGI:104750]
ENSMUSG00000102376	11.84	0.21	5.4277	6.2377e-06	0.00014237	9	10	6	18	0	0	0	1	Gm37975	predicted gene, 37975 [Source:MGI Symbol;Acc:MGI:5611203]
ENSMUSG00000046618	65.73	168.49	-1.3553	6.2473e-06	0.00014237	54	59	100	31	146	202	222	181	Olfml2a	olfactomedin-like 2A [Source:MGI Symbol;Acc:MGI:2444741]
ENSMUSG00000022586	101.12	12.01	3.0686	6.504e-06	0.00014776	237	27	46	43	9	17	20	8	Ly6i	lymphocyte antigen 6 complex, locus I [Source:MGI Symbol;Acc:MGI:1888480]
ENSMUSG00000026712	940.71	2456.74	-1.3851	6.5142e-06	0.00014788	1277	485	984	670	2193	3174	3274	2298	Mrc1	mannose receptor, C type 1 [Source:MGI Symbol;Acc:MGI:97142]
ENSMUSG00000019841	818.69	1668.99	-1.0279	6.7025e-06	0.00015169	648	710	815	832	976	2551	2221	1830	Rev3l	REV3 like, DNA directed polymerase zeta catalytic subunit [Source:MGI Symbol;Acc:MGI:1337131]
ENSMUSG00000042265	50	9.75	2.3979	6.6976e-06	0.00015169	40	43	67	35	21	9	7	3	Trem1	triggering receptor expressed on myeloid cells 1 [Source:MGI Symbol;Acc:MGI:1930005]
ENSMUSG00000057719	7.96	41.85	-2.4027	6.7811e-06	0.00015331	5	14	7	3	21	62	73	35	Sh3rf2	SH3 domain containing ring finger 2 [Source:MGI Symbol;Acc:MGI:2444628]
ENSMUSG00000056632	43.08	3.62	3.5718	6.8329e-06	0.00015429	68	62	10	11	4	8	2	2	Dsg3	desmoglein 3 [Source:MGI Symbol;Acc:MGI:99499]
ENSMUSG00000042622	1694.72	674.46	1.3301	6.9082e-06	0.00015587	1460	1084	1645	2030	945	531	811	616	Maff	v-maf musculoaponeurotic fibrosarcoma oncogene family, protein F (avian) [Source:MGI Symbol;Acc:MGI:96910]
ENSMUSG00000020712	6.03	25.32	-2.0647	7.1905e-06	0.0001615	5	6	5	6	32	25	26	27	Tcam1	testicular cell adhesion molecule 1 [Source:MGI Symbol;Acc:MGI:1923120]
ENSMUSG00000042808	193.5	31.67	2.6211	7.3971e-06	0.00016588	271	182	77	158	68	28	24	10	Gpx2	glutathione peroxidase 2 [Source:MGI Symbol;Acc:MGI:106609]
ENSMUSG00000055799	81.48	194.87	-1.2623	7.4549e-06	0.00016706	73	107	59	56	137	227	271	242	Tcf7l1	transcription factor 7 like 1 (T cell specific, HMG box) [Source:MGI Symbol;Acc:MGI:1202876]
ENSMUSG00000037341	11.92	42.86	-1.8428	7.6216e-06	0.00017028	9	7	13	15	38	64	28	61	Slc9a7	solute carrier family 9 (sodium/hydrogen exchanger), member 7 [Source:MGI Symbol;Acc:MGI:2444530]
ENSMUSG00000053182	1.37	23.68	-4.12	7.6849e-06	0.00017143	0	2	0	3	5	42	25	38	Gm609	predicted gene 609 [Source:MGI Symbol;Acc:MGI:2685455]
ENSMUSG00000026315	228.61	537.5	-1.2334	7.7985e-06	0.00017323	169	316	204	145	582	567	516	697	Serpinb8	serine (or cysteine) peptidase inhibitor, clade B, member 8 [Source:MGI Symbol;Acc:MGI:894657]
ENSMUSG00000027208	89.28	193.27	-1.1175	7.7972e-06	0.00017323	76	87	91	73	110	284	246	238	Fgf7	fibroblast growth factor 7 [Source:MGI Symbol;Acc:MGI:95521]
ENSMUSG00000026822	83614.9	18421.6	2.1824	7.7942e-06	0.00017323	117721	55288	72097	56336	36292	13702	18564	7901	Lcn2	lipocalin 2 [Source:MGI Symbol;Acc:MGI:96757]
ENSMUSG00000001986	113.22	307.84	-1.4463	7.7872e-06	0.00017323	138	107	96	68	161	430	451	360	Gria3	glutamate receptor, ionotropic, AMPA3 (alpha 3) [Source:MGI Symbol;Acc:MGI:95810]
ENSMUSG00000054453	9.45	36.07	-1.9318	7.8499e-06	0.00017419	8	7	13	7	21	64	43	36	Sytl5	synaptotagmin-like 5 [Source:MGI Symbol;Acc:MGI:2668451]
ENSMUSG00000022425	374.5	183.79	1.0261	7.9746e-06	0.00017669	341	391	387	250	156	170	274	219	Enpp2	ectonucleotide pyrophosphatase/phosphodiesterase 2 [Source:MGI Symbol;Acc:MGI:1321390]
ENSMUSG00000050747	311.05	84.53	1.8833	7.9818e-06	0.00017672	362	327	181	247	136	57	115	51	Trim15	tripartite motif-containing 15 [Source:MGI Symbol;Acc:MGI:1916347]
ENSMUSG00000112963	22.67	3.83	2.622	8.0488e-06	0.00017807	10	28	26	20	7	2	4	3	Gm6093	predicted gene 6093 [Source:MGI Symbol;Acc:MGI:3648840]
ENSMUSG00000024014	4147.51	1914.93	1.1151	8.1116e-06	0.00017933	3744	3020	3904	4511	2082	1602	2993	1731	Pim1	proviral integration site 1 [Source:MGI Symbol;Acc:MGI:97584]
ENSMUSG00000017767	3.47	19.98	-2.5099	8.1688e-06	0.00018032	3	1	6	3	14	26	25	25	Spata25	spermatogenesis associated 25 [Source:MGI Symbol;Acc:MGI:1922892]
ENSMUSG00000079334	388.73	885.24	-1.1865	8.201e-06	0.00018076	217	458	370	385	1107	872	1054	817	Naa80	N(alpha)-acetyltransferase 80, NatH catalytic subunit [Source:MGI Symbol;Acc:MGI:1888902]
ENSMUSG00000043635	140.74	297.92	-1.0805	8.2244e-06	0.00018114	107	91	196	129	219	379	414	327	Adamts3	a disintegrin-like and metallopeptidase (reprolysin type) with thrombospondin type 1 motif, 3 [Source:MGI Symbol;Acc:MGI:3045353]
ENSMUSG00000077565	58.53	20.44	1.507	8.2607e-06	0.00018181	67	43	46	56	14	22	21	35	Gm23201	predicted gene, 23201 [Source:MGI Symbol;Acc:MGI:5452978]
ENSMUSG00000029438	213.54	475.01	-1.1546	8.3202e-06	0.00018285	144	263	184	190	290	677	562	623	Bcl7a	B cell CLL/lymphoma 7A [Source:MGI Symbol;Acc:MGI:1924295]
ENSMUSG00000016528	6448.93	3019.62	1.0949	8.4855e-06	0.00018634	4813	4331	7906	6824	3938	2950	3217	2982	Mapkapk2	MAP kinase-activated protein kinase 2 [Source:MGI Symbol;Acc:MGI:109298]
ENSMUSG00000035105	2586.79	639.05	2.0174	8.6995e-06	0.00019062	2422	494	3397	3279	761	678	630	721	Egln3	egl-9 family hypoxia-inducible factor 3 [Source:MGI Symbol;Acc:MGI:1932288]
ENSMUSG00000024798	25.02	4.74	2.4426	8.8332e-06	0.00019297	20	26	29	17	8	2	8	2	Htr7	5-hydroxytryptamine (serotonin) receptor 7 [Source:MGI Symbol;Acc:MGI:99841]
ENSMUSG00000039976	307	820.85	-1.4197	9.0452e-06	0.00019746	219	419	228	251	415	1250	1040	1039	Tbc1d16	TBC1 domain family, member 16 [Source:MGI Symbol;Acc:MGI:2652878]
ENSMUSG00000047180	2609.05	509.4	2.3572	9.1599e-06	0.00019967	4647	974	1553	2102	963	401	381	380	Neurl3	neuralized E3 ubiquitin protein ligase 3 [Source:MGI Symbol;Acc:MGI:2429944]
ENSMUSG00000046844	38.91	9.01	2.1081	9.5608e-06	0.00020734	31	55	27	28	8	5	18	9	Vat1l	vesicle amine transport protein 1 like [Source:MGI Symbol;Acc:MGI:2142534]
ENSMUSG00000050900	47.25	19.02	1.3141	9.5788e-06	0.00020758	44	50	42	36	19	20	22	23	Gm7327	predicted gene 7327 [Source:MGI Symbol;Acc:MGI:3646274]
ENSMUSG00000005980	44.67	99.63	-1.1622	9.621e-06	0.00020834	31	55	35	42	72	123	132	121	Dnase1	deoxyribonuclease I [Source:MGI Symbol;Acc:MGI:103157]
ENSMUSG00000107017	36.84	12.54	1.5677	9.7967e-06	0.00021184	28	24	41	43	14	13	15	13	Gm43196	predicted gene 43196 [Source:MGI Symbol;Acc:MGI:5663333]
ENSMUSG00000048814	1.94	16.49	-3.1044	9.8654e-06	0.00021316	3	1	2	1	16	20	13	24	Lonrf2	LON peptidase N-terminal domain and ring finger 2 [Source:MGI Symbol;Acc:MGI:1920209]
ENSMUSG00000104082	18.1	2.4	2.8817	9.9222e-06	0.00021423	19	8	15	24	1	3	3	4	Gm7115	predicted gene 7115 [Source:MGI Symbol;Acc:MGI:3646388]
ENSMUSG00000090881	27.51	5.84	2.2286	9.997e-06	0.00021569	35	29	22	13	5	6	6	9	Phf11	PHD finger protein 11 [Source:MGI Symbol;Acc:MGI:3644962]
ENSMUSG00000055170	14.25	1.83	2.9774	1.0024e-05	0.00021613	13	13	13	13	2	1	2	3	Ifng	interferon gamma [Source:MGI Symbol;Acc:MGI:107656]
ENSMUSG00000019577	573.28	2262.64	-1.981	1.0245e-05	0.00022025	691	464	538	386	734	2964	1664	5050	Pdk4	pyruvate dehydrogenase kinase, isoenzyme 4 [Source:MGI Symbol;Acc:MGI:1351481]
ENSMUSG00000097534	80.86	36.17	1.1589	1.0315e-05	0.00022125	64	53	99	83	29	50	46	37	Gm16675	predicted gene, 16675 [Source:MGI Symbol;Acc:MGI:4439599]
ENSMUSG00000115855	13.77	0.49	4.9217	1.0318e-05	0.00022125	14	14	12	10	1	0	0	1	Gm34643	predicted gene, 34643 [Source:MGI Symbol;Acc:MGI:5593802]
ENSMUSG00000116656	8.35	36.24	-2.139	1.0322e-05	0.00022125	10	10	6	4	16	58	46	46	Gm49708	predicted gene, 49708 [Source:MGI Symbol;Acc:MGI:6215173]
ENSMUSG00000025504	581.71	1493.29	-1.3601	1.0464e-05	0.00022414	266	637	594	654	859	2128	2138	1656	Eps8l2	EPS8-like 2 [Source:MGI Symbol;Acc:MGI:2138828]
ENSMUSG00000117604	295.13	79.22	1.8983	1.0585e-05	0.00022641	150	101	546	322	72	84	114	82	Gm33228	predicted gene, 33228 [Source:MGI Symbol;Acc:MGI:5592387]
ENSMUSG00000031295	367.52	744.78	-1.0178	1.0722e-05	0.00022916	213	263	473	419	678	841	836	954	Phka2	phosphorylase kinase alpha 2 [Source:MGI Symbol;Acc:MGI:97577]
ENSMUSG00000045392	349.47	127.4	1.4551	1.0798e-05	0.00023062	231	167	519	390	86	138	170	180	Olfr1033	olfactory receptor 1033 [Source:MGI Symbol;Acc:MGI:3030867]
ENSMUSG00000042202	752.49	2297.79	-1.6104	1.091e-05	0.00023252	267	1020	814	686	1325	3568	2971	2575	Slc35e2	solute carrier family 35, member E2 [Source:MGI Symbol;Acc:MGI:2444240]
ENSMUSG00000041670	6.34	29.39	-2.2288	1.1108e-05	0.00023622	7	4	5	7	16	54	39	25	Rims1	regulating synaptic membrane exocytosis 1 [Source:MGI Symbol;Acc:MGI:2152971]
ENSMUSG00000020651	7653.58	698.28	3.4543	1.1243e-05	0.00023893	18353	1783	3177	3348	816	912	705	624	Slc26a4	solute carrier family 26, member 4 [Source:MGI Symbol;Acc:MGI:1346029]
ENSMUSG00000028909	67	197.37	-1.554	1.1381e-05	0.00024168	40	35	124	54	151	229	285	220	Ptpru	protein tyrosine phosphatase, receptor type, U [Source:MGI Symbol;Acc:MGI:1321151]
ENSMUSG00000035653	8.74	0	5.7138	1.1541e-05	0.00024472	9	10	11	2	0	0	0	0	Lrfn5	leucine rich repeat and fibronectin type III domain containing 5 [Source:MGI Symbol;Acc:MGI:2144814]
ENSMUSG00000103662	22.23	54.7	-1.2995	1.1583e-05	0.00024526	20	16	28	18	40	74	73	59	Gm34294	predicted gene, 34294 [Source:MGI Symbol;Acc:MGI:5593453]
ENSMUSG00000040017	11.13	0.27	5.3498	1.1596e-05	0.00024536	5	10	20	7	1	0	0	0	Saa4	serum amyloid A 4 [Source:MGI Symbol;Acc:MGI:98224]
ENSMUSG00000050565	9914.38	4597.96	1.1086	1.1676e-05	0.0002467	6608	5728	12576	11940	4930	4959	5072	5263	Tor1aip2	torsin A interacting protein 2 [Source:MGI Symbol;Acc:MGI:3582695]
ENSMUSG00000085511	32.95	5.18	2.6683	1.1709e-05	0.0002472	50	11	42	17	5	8	7	3	Gm11738	predicted gene 11738 [Source:MGI Symbol;Acc:MGI:3650365]
ENSMUSG00000041794	29.2	77.08	-1.4049	1.1779e-05	0.00024834	23	28	28	28	45	73	121	110	Myrip	myosin VIIA and Rab interacting protein [Source:MGI Symbol;Acc:MGI:2384407]
ENSMUSG00000037211	512.46	243.57	1.0719	1.1977e-05	0.00025217	565	498	381	408	205	271	375	236	Spry1	sprouty RTK signaling antagonist 1 [Source:MGI Symbol;Acc:MGI:1345139]
ENSMUSG00000109446	22.82	1.92	3.5208	1.219e-05	0.00025611	31	32	11	7	0	3	2	4	Gm9195	predicted gene 9195 [Source:MGI Symbol;Acc:MGI:3779838]
ENSMUSG00000078903	5.82	29.04	-2.3343	1.2247e-05	0.00025704	5	5	2	9	21	55	31	24	Gm14391	predicted gene 14391 [Source:MGI Symbol;Acc:MGI:3709324]
ENSMUSG00000033855	325.49	916.35	-1.4924	1.2252e-05	0.00025704	197	156	540	331	610	1242	1008	1276	Ston1	stonin 1 [Source:MGI Symbol;Acc:MGI:1924307]
ENSMUSG00000026604	1071.02	2245.82	-1.0685	1.2413e-05	0.00026005	785	978	1105	1071	1205	3346	3022	2651	Ptpn14	protein tyrosine phosphatase, non-receptor type 14 [Source:MGI Symbol;Acc:MGI:102467]
ENSMUSG00000043518	277.53	639.77	-1.2051	1.2411e-05	0.00026005	152	396	221	246	572	753	723	798	Rai2	retinoic acid induced 2 [Source:MGI Symbol;Acc:MGI:1344378]
ENSMUSG00000026773	4523.4	1662.72	1.444	1.2714e-05	0.00026597	2655	2827	4759	6516	1923	1620	2500	1232	Pfkfb3	6-phosphofructo-2-kinase/fructose-2,6-biphosphatase 3 [Source:MGI Symbol;Acc:MGI:2181202]
ENSMUSG00000031379	25.4	61.33	-1.272	1.2725e-05	0.00026601	20	28	25	20	57	58	92	65	Pir	pirin [Source:MGI Symbol;Acc:MGI:1916906]
ENSMUSG00000034584	39.18	115.69	-1.5611	1.2871e-05	0.0002687	31	15	45	54	80	178	147	117	Exph5	exophilin 5 [Source:MGI Symbol;Acc:MGI:2443248]
ENSMUSG00000022840	328.54	820.81	-1.322	1.2986e-05	0.00027071	272	447	248	225	464	1122	1118	1024	Adcy5	adenylate cyclase 5 [Source:MGI Symbol;Acc:MGI:99673]
ENSMUSG00000072844	83.81	14.56	2.5301	1.3085e-05	0.00027259	71	26	189	32	16	19	10	19	G530011O06Rik	RIKEN cDNA G530011O06 gene [Source:MGI Symbol;Acc:MGI:3603513]
ENSMUSG00000098934	21.65	3.83	2.4474	1.3246e-05	0.00027517	22	15	20	22	0	6	8	4	Gvin-ps4	GTPase, very large interferon inducible, pseudogene 4 [Source:MGI Symbol;Acc:MGI:5011038]
ENSMUSG00000000901	471.47	1393.87	-1.5643	1.3368e-05	0.0002775	498	430	477	313	540	1873	1460	2521	Mmp11	matrix metallopeptidase 11 [Source:MGI Symbol;Acc:MGI:97008]
ENSMUSG00000073403	27.5	3.48	3.0065	1.3543e-05	0.00028093	9	13	32	49	5	4	5	1	Gm10499	predicted gene 10499 [Source:MGI Symbol;Acc:MGI:3702919]
ENSMUSG00000090164	5.53	27.11	-2.2715	1.36e-05	0.00028187	1	5	10	5	16	38	39	30	BC035044	cDNA sequence BC035044 [Source:MGI Symbol;Acc:MGI:2448540]
ENSMUSG00000079597	13.89	0.76	4.3369	1.3607e-05	0.00028187	7	18	12	14	2	0	1	0	Cstdc4	cystatin domain containing 4 [Source:MGI Symbol;Acc:MGI:3645124]
ENSMUSG00000025314	2216.51	1093.5	1.0189	1.3642e-05	0.00028224	2365	1374	2301	2063	768	1618	1361	1182	Ptprj	protein tyrosine phosphatase, receptor type, J [Source:MGI Symbol;Acc:MGI:104574]
ENSMUSG00000030708	31.94	99.18	-1.6324	1.3644e-05	0.00028224	18	21	41	39	50	125	172	105	Dnajb13	DnaJ heat shock protein family (Hsp40) member B13 [Source:MGI Symbol;Acc:MGI:1916637]
ENSMUSG00000010755	2130.53	951.93	1.1624	1.3706e-05	0.00028333	2290	2476	1366	1540	1070	1027	1073	1004	Cars	cysteinyl-tRNA synthetase [Source:MGI Symbol;Acc:MGI:1351477]
ENSMUSG00000025333	15.52	61.45	-1.9792	1.3843e-05	0.00028597	14	3	25	16	41	70	65	101	Gpr143	G protein-coupled receptor 143 [Source:MGI Symbol;Acc:MGI:107193]
ENSMUSG00000027313	368.78	78.73	2.2289	1.4296e-05	0.00029429	568	464	137	132	102	64	69	106	Chac1	ChaC, cation transport regulator 1 [Source:MGI Symbol;Acc:MGI:1916315]
ENSMUSG00000094634	45.49	17.83	1.3421	1.4705e-05	0.00030207	39	48	41	38	14	27	23	16	Gm3468	predicted gene 3468 [Source:MGI Symbol;Acc:MGI:3781644]
ENSMUSG00000046312	33.03	90.34	-1.453	1.4725e-05	0.00030227	22	34	39	27	44	118	108	142	Myorg	myogenesis regulating glycosidase (putative) [Source:MGI Symbol;Acc:MGI:2140300]
ENSMUSG00000034731	985.43	2148.39	-1.1246	1.4994e-05	0.00030737	611	1018	959	1038	1260	3116	3147	2228	Dgkh	diacylglycerol kinase, eta [Source:MGI Symbol;Acc:MGI:2444188]
ENSMUSG00000023067	3744.09	1768.41	1.0822	1.5227e-05	0.00031151	3222	2550	4199	3812	1598	1758	1502	2994	Cdkn1a	cyclin-dependent kinase inhibitor 1A (P21) [Source:MGI Symbol;Acc:MGI:104556]
ENSMUSG00000115801	33.2	7.8	2.081	1.5355e-05	0.00031391	42	12	34	33	6	10	11	8	-	novel transcript
ENSMUSG00000116396	16.04	1.98	2.9903	1.5712e-05	0.00032098	15	20	11	12	1	2	5	1	Gm20556	predicted gene, 20556 [Source:MGI Symbol;Acc:MGI:5295663]
ENSMUSG00000033967	48.76	10.71	2.185	1.6211e-05	0.00032958	33	18	67	64	8	11	7	22	Rnf225	ring finger protein 225 [Source:MGI Symbol;Acc:MGI:1924198]
ENSMUSG00000028540	226.25	107.23	1.0745	1.6483e-05	0.0003342	257	210	200	153	88	124	109	158	Dph2	DPH2 homolog [Source:MGI Symbol;Acc:MGI:1914978]
ENSMUSG00000020176	2650.64	5658.98	-1.0941	1.6679e-05	0.00033794	2186	1478	3851	2340	5306	6279	5786	7725	Grb10	growth factor receptor bound protein 10 [Source:MGI Symbol;Acc:MGI:103232]
ENSMUSG00000032377	128.96	333.42	-1.373	1.6737e-05	0.00033889	139	147	112	69	183	423	447	462	Plscr4	phospholipid scramblase 4 [Source:MGI Symbol;Acc:MGI:2143267]
ENSMUSG00000027748	140.83	421.24	-1.5798	1.683e-05	0.0003403	99	116	240	72	220	591	482	625	Trpc4	transient receptor potential cation channel, subfamily C, member 4 [Source:MGI Symbol;Acc:MGI:109525]
ENSMUSG00000047146	4.84	22.3	-2.1941	1.7191e-05	0.00034666	2	3	5	8	17	27	24	32	Tet1	tet methylcytosine dioxygenase 1 [Source:MGI Symbol;Acc:MGI:1098693]
ENSMUSG00000091455	80.23	233.37	-1.5378	1.7766e-05	0.00035703	57	37	134	73	161	332	208	351	Otogl	otogelin-like [Source:MGI Symbol;Acc:MGI:3647600]
ENSMUSG00000028528	8.88	30.21	-1.757	1.8099e-05	0.00036323	5	10	12	6	25	37	44	29	Dnajc6	DnaJ heat shock protein family (Hsp40) member C6 [Source:MGI Symbol;Acc:MGI:1919935]
ENSMUSG00000046352	4927.98	1875.64	1.3938	1.8382e-05	0.00036841	2592	6224	5291	4074	2438	1886	2531	1280	Gjb2	gap junction protein, beta 2 [Source:MGI Symbol;Acc:MGI:95720]
ENSMUSG00000025610	37.99	90.74	-1.2646	1.8477e-05	0.00037007	39	39	34	26	54	107	123	127	Map3k7cl	Map3k7 C-terminal like [Source:MGI Symbol;Acc:MGI:2446584]
ENSMUSG00000022951	2527.78	839.12	1.5915	1.8516e-05	0.0003706	2586	2104	1624	2832	1421	636	857	631	Rcan1	regulator of calcineurin 1 [Source:MGI Symbol;Acc:MGI:1890564]
ENSMUSG00000050777	92.68	229.78	-1.3082	1.8638e-05	0.00037279	81	46	131	86	191	236	226	372	Tmem37	transmembrane protein 37 [Source:MGI Symbol;Acc:MGI:2157899]
ENSMUSG00000055926	644	218.19	1.561	1.8655e-05	0.00037288	1039	325	449	490	203	273	270	223	Gm14137	predicted gene 14137 [Source:MGI Symbol;Acc:MGI:3651144]
ENSMUSG00000031785	1718.99	3570.98	-1.0547	1.8879e-05	0.00037659	866	2047	1889	1552	2761	4465	4466	4317	Adgrg1	adhesion G protein-coupled receptor G1 [Source:MGI Symbol;Acc:MGI:1340051]
ENSMUSG00000091119	28.56	80.12	-1.4812	1.8947e-05	0.00037768	20	14	46	27	59	106	79	116	Ccdc152	coiled-coil domain containing 152 [Source:MGI Symbol;Acc:MGI:3641617]
ENSMUSG00000026069	289.17	69.13	2.0662	1.9078e-05	0.00038005	171	92	659	183	71	81	66	87	Il1rl1	interleukin 1 receptor-like 1 [Source:MGI Symbol;Acc:MGI:98427]
ENSMUSG00000027490	85.57	176.28	-1.0376	1.9233e-05	0.00038288	64	73	114	66	199	210	153	211	E2f1	E2F transcription factor 1 [Source:MGI Symbol;Acc:MGI:101941]
ENSMUSG00000043811	9.21	40.51	-2.1235	1.9328e-05	0.00038451	7	5	10	12	69	32	32	38	Rtn4r	reticulon 4 receptor [Source:MGI Symbol;Acc:MGI:2136886]
ENSMUSG00000086187	34.1	4.46	2.8965	1.9442e-05	0.00038652	33	55	15	19	0	8	9	4	Gm12860	predicted gene 12860 [Source:MGI Symbol;Acc:MGI:3651651]
ENSMUSG00000087264	30.93	4.35	2.8356	1.952e-05	0.00038775	56	14	21	19	5	2	9	3	Gad1os	glutamate decarboxylase 1, opposite strand [Source:MGI Symbol;Acc:MGI:1916236]
ENSMUSG00000112441	127.5	403.16	-1.663	1.9545e-05	0.00038779	147	161	97	54	197	575	569	499	Gm48898	predicted gene, 48898 [Source:MGI Symbol;Acc:MGI:6098663]
ENSMUSG00000020916	71.95	1.12	6.0034	1.9739e-05	0.00039111	4	2	123	147	1	2	1	1	Krt36	keratin 36 [Source:MGI Symbol;Acc:MGI:109364]
ENSMUSG00000035045	38.68	77.39	-1.0034	1.976e-05	0.00039126	28	36	37	41	60	101	97	89	Zc3h12b	zinc finger CCCH-type containing 12B [Source:MGI Symbol;Acc:MGI:2442133]
ENSMUSG00000050635	15667.5	825.18	4.2468	2.0082e-05	0.00039738	25090	24500	1916	3161	352	1272	309	1845	Sprr2f	small proline-rich protein 2F [Source:MGI Symbol;Acc:MGI:1330349]
ENSMUSG00000029348	8.55	31.41	-1.8839	2.0288e-05	0.00040091	6	12	5	8	30	26	49	34	Asphd2	aspartate beta-hydroxylase domain containing 2 [Source:MGI Symbol;Acc:MGI:1920148]
ENSMUSG00000039981	34.62	12.49	1.482	2.1281e-05	0.00041913	25	29	42	32	13	13	11	18	Zc3h12d	zinc finger CCCH type containing 12D [Source:MGI Symbol;Acc:MGI:3045313]
ENSMUSG00000039385	107.07	224.82	-1.0737	2.1354e-05	0.00042002	88	125	89	88	137	288	309	284	Cdh6	cadherin 6 [Source:MGI Symbol;Acc:MGI:107435]
ENSMUSG00000027702	86.84	328.93	-1.9215	2.1568e-05	0.00042305	118	25	125	51	252	389	269	564	Lrrc34	leucine rich repeat containing 34 [Source:MGI Symbol;Acc:MGI:1919077]
ENSMUSG00000035878	25.15	60.79	-1.2741	2.1682e-05	0.0004242	16	25	30	22	38	78	78	81	Hykk	hydroxylysine kinase 1 [Source:MGI Symbol;Acc:MGI:2443139]
ENSMUSG00000063522	285.5	18.66	3.9407	2.1995e-05	0.00042978	221	666	50	76	35	19	9	15	Ly6m	lymphocyte antigen 6 complex, locus M [Source:MGI Symbol;Acc:MGI:1914288]
ENSMUSG00000053166	8.64	0	5.7069	2.264e-05	0.00044208	3	3	17	10	0	0	0	0	Cdh22	cadherin 22 [Source:MGI Symbol;Acc:MGI:1341843]
ENSMUSG00000040152	12724.2	4940.68	1.3648	2.2909e-05	0.00044626	14424	9167	6705	15527	5458	4630	6995	4596	Thbs1	thrombospondin 1 [Source:MGI Symbol;Acc:MGI:98737]
ENSMUSG00000031538	3179.76	1387.9	1.1958	2.2928e-05	0.00044626	4323	2466	2169	2458	1094	1493	1825	1799	Plat	plasminogen activator, tissue [Source:MGI Symbol;Acc:MGI:97610]
ENSMUSG00000111089	14.81	1.19	3.6967	2.3253e-05	0.00045107	15	7	12	20	2	0	3	0	Gm49427	predicted gene, 49427 [Source:MGI Symbol;Acc:MGI:6155063]
ENSMUSG00000022708	476.29	1143.3	-1.2631	2.3546e-05	0.00045645	282	298	580	611	672	1638	1412	1465	Zbtb20	zinc finger and BTB domain containing 20 [Source:MGI Symbol;Acc:MGI:1929213]
ENSMUSG00000021624	30.03	91.51	-1.6052	2.3782e-05	0.00046043	34	8	43	26	82	107	101	117	Cd180	CD180 antigen [Source:MGI Symbol;Acc:MGI:1194924]
ENSMUSG00000015568	500.86	1378.81	-1.4616	2.391e-05	0.000462	641	448	411	306	781	1585	1327	2559	Lpl	lipoprotein lipase [Source:MGI Symbol;Acc:MGI:96820]
ENSMUSG00000084289	28.22	6.65	2.0939	2.3959e-05	0.00046264	40	19	28	15	8	6	7	8	Fth1-ps	ferritin heavy polypeptide 1, pseudogene [Source:MGI Symbol;Acc:MGI:3647597]
ENSMUSG00000022181	11.09	41.69	-1.9231	2.3991e-05	0.00046297	18	6	12	4	31	43	51	62	C6	complement component 6 [Source:MGI Symbol;Acc:MGI:88233]
ENSMUSG00000033705	205.67	520.77	-1.3389	2.4332e-05	0.00046893	114	105	304	248	389	682	645	623	Stard9	START domain containing 9 [Source:MGI Symbol;Acc:MGI:3045258]
ENSMUSG00000040569	4.66	24.78	-2.4233	2.4407e-05	0.00047006	4	5	4	4	9	38	42	25	Slc26a7	solute carrier family 26, member 7 [Source:MGI Symbol;Acc:MGI:2384791]
ENSMUSG00000052133	39.54	84.43	-1.1048	2.4773e-05	0.0004768	43	39	30	31	63	102	100	114	Sema5b	sema domain, seven thrombospondin repeats (type 1 and type 1-like), transmembrane domain (TM) and short cytoplasmic domain, (semaphorin) 5B [Source:MGI Symbol;Acc:MGI:107555]
ENSMUSG00000050538	19.85	48.59	-1.2916	2.5265e-05	0.00048532	19	17	25	12	40	53	64	60	B230217C12Rik	RIKEN cDNA B230217C12 gene [Source:MGI Symbol;Acc:MGI:1915377]
ENSMUSG00000089762	313.51	99.66	1.6528	2.5389e-05	0.0004874	335	461	205	125	94	119	93	136	Ier5l	immediate early response 5-like [Source:MGI Symbol;Acc:MGI:1919750]
ENSMUSG00000097888	99.09	25.96	1.9342	2.5477e-05	0.00048845	93	152	77	36	29	31	38	16	Gm26682	predicted gene, 26682 [Source:MGI Symbol;Acc:MGI:5477176]
ENSMUSG00000005364	199.87	606.77	-1.6012	2.6253e-05	0.00050235	58	180	241	268	423	743	939	628	Il5ra	interleukin 5 receptor, alpha [Source:MGI Symbol;Acc:MGI:96558]
ENSMUSG00000111394	1857.53	553.04	1.7481	2.6365e-05	0.00050417	955	598	2381	3018	573	686	601	580	Gm49759	predicted gene, 49759 [Source:MGI Symbol;Acc:MGI:6215263]
ENSMUSG00000030532	10.06	30.77	-1.614	2.7065e-05	0.00051623	8	7	10	12	23	33	38	44	Hddc3	HD domain containing 3 [Source:MGI Symbol;Acc:MGI:1915945]
ENSMUSG00000021091	3895.32	1293.12	1.5912	2.7148e-05	0.00051747	3019	2332	6409	2801	1878	920	978	1767	Serpina3n	serine (or cysteine) peptidase inhibitor, clade A, member 3N [Source:MGI Symbol;Acc:MGI:105045]
ENSMUSG00000038777	85.22	203.64	-1.2585	2.7829e-05	0.0005291	71	96	89	56	132	237	192	358	Sema6c	sema domain, transmembrane domain (TM), and cytoplasmic domain, (semaphorin) 6C [Source:MGI Symbol;Acc:MGI:1338032]
ENSMUSG00000025877	285.29	135.35	1.0789	2.8049e-05	0.00053259	265	178	333	274	162	149	172	108	Hk3	hexokinase 3 [Source:MGI Symbol;Acc:MGI:2670962]
ENSMUSG00000003469	19.37	64.18	-1.726	2.8196e-05	0.00053504	10	33	19	9	74	72	77	58	Phyhip	phytanoyl-CoA hydroxylase interacting protein [Source:MGI Symbol;Acc:MGI:1860417]
ENSMUSG00000032554	1231.91	4315.57	-1.8088	2.9069e-05	0.00055091	1191	1331	1218	750	1959	3185	3846	10663	Trf	transferrin [Source:MGI Symbol;Acc:MGI:98821]
ENSMUSG00000026888	30.59	83.13	-1.4468	2.9699e-05	0.00056169	19	49	19	24	71	109	103	88	Grb14	growth factor receptor bound protein 14 [Source:MGI Symbol;Acc:MGI:1355324]
ENSMUSG00000038963	783.18	2056.03	-1.3924	2.9714e-05	0.00056169	596	601	966	733	1217	2808	3931	1373	Slco4a1	solute carrier organic anion transporter family, member 4a1 [Source:MGI Symbol;Acc:MGI:1351866]
ENSMUSG00000055235	4.47	23.07	-2.3384	3.0032e-05	0.00056661	1	5	9	2	19	25	23	36	Wdr86	WD repeat domain 86 [Source:MGI Symbol;Acc:MGI:1915466]
ENSMUSG00000020593	122.6	318.46	-1.3765	3.0291e-05	0.00057076	108	64	163	119	226	337	279	589	Lpin1	lipin 1 [Source:MGI Symbol;Acc:MGI:1891340]
ENSMUSG00000026489	134.59	312.23	-1.2128	3.0391e-05	0.00057229	68	185	153	91	307	342	370	362	Coq8a	coenzyme Q8A [Source:MGI Symbol;Acc:MGI:1914676]
ENSMUSG00000055102	29.8	0.42	6.0517	3.1958e-05	0.0005995	1	2	47	64	0	1	0	1	Zfp819	zinc finger protein 819 [Source:MGI Symbol;Acc:MGI:1921650]
ENSMUSG00000021356	26.84	63.28	-1.245	3.261e-05	0.0006102	23	29	25	21	40	78	73	95	Irf4	interferon regulatory factor 4 [Source:MGI Symbol;Acc:MGI:1096873]
ENSMUSG00000021567	90.25	180.37	-1.0048	3.2661e-05	0.00061066	94	82	68	83	119	223	222	250	Nkd2	naked cuticle 2 [Source:MGI Symbol;Acc:MGI:1919543]
ENSMUSG00000005268	778.14	1779.54	-1.1929	3.2677e-05	0.00061066	531	490	1303	593	1641	2324	1690	2252	Prlr	prolactin receptor [Source:MGI Symbol;Acc:MGI:97763]
ENSMUSG00000027419	13.39	1.19	3.5469	3.2907e-05	0.00061419	15	16	7	10	2	0	2	1	Pcsk2	proprotein convertase subtilisin/kexin type 2 [Source:MGI Symbol;Acc:MGI:97512]
ENSMUSG00000025128	113.5	44.08	1.3633	3.3037e-05	0.00061584	140	111	88	70	42	34	61	58	Bhlhe22	basic helix-loop-helix family, member e22 [Source:MGI Symbol;Acc:MGI:1930001]
ENSMUSG00000006784	15.25	43.6	-1.5216	3.3094e-05	0.00061653	12	12	15	17	24	53	52	69	Odad4	outer dynein arm complex subunit 4 [Source:MGI Symbol;Acc:MGI:1921657]
ENSMUSG00000052430	139.24	316.4	-1.1844	3.3698e-05	0.00062738	84	138	138	153	217	467	490	254	Bmpr1b	bone morphogenetic protein receptor, type 1B [Source:MGI Symbol;Acc:MGI:107191]
ENSMUSG00000043668	53.79	123.13	-1.1929	3.3808e-05	0.00062903	37	51	67	44	96	130	113	212	Tox3	TOX high mobility group box family member 3 [Source:MGI Symbol;Acc:MGI:3039593]
ENSMUSG00000011034	2890.94	570.3	2.3418	3.4354e-05	0.00063878	6288	844	1207	1790	705	709	665	407	Slc5a1	solute carrier family 5 (sodium/glucose cotransporter), member 1 [Source:MGI Symbol;Acc:MGI:107678]
ENSMUSG00000086596	19.21	48.22	-1.327	3.5631e-05	0.0006588	13	21	24	13	35	69	60	53	Susd5	sushi domain containing 5 [Source:MGI Symbol;Acc:MGI:2685972]
ENSMUSG00000054939	17.57	47.13	-1.4334	3.585e-05	0.00066244	16	17	15	16	30	61	46	76	Zfp174	zinc finger protein 174 [Source:MGI Symbol;Acc:MGI:2686600]
ENSMUSG00000098985	37.2	12.92	1.5395	3.6141e-05	0.00066698	38	39	32	26	17	16	10	13	Gm27219	predicted gene 27219 [Source:MGI Symbol;Acc:MGI:5521062]
ENSMUSG00000036381	89.65	36.08	1.3126	3.6364e-05	0.00067027	96	87	98	46	34	38	54	34	P2ry14	purinergic receptor P2Y, G-protein coupled, 14 [Source:MGI Symbol;Acc:MGI:2155705]
ENSMUSG00000055134	7.91	25.35	-1.6819	3.668e-05	0.00067567	5	9	7	8	22	31	31	29	9130017K11Rik	RIKEN cDNA 9130017K11 gene [Source:MGI Symbol;Acc:MGI:1926030]
ENSMUSG00000019326	469.46	994.14	-1.0835	3.682e-05	0.00067783	444	510	326	420	576	1272	1274	1387	Aoc3	amine oxidase, copper containing 3 [Source:MGI Symbol;Acc:MGI:1306797]
ENSMUSG00000091650	12.75	1.34	3.2345	3.7505e-05	0.00068915	13	16	9	8	1	1	2	2	Apol11a	apolipoprotein L 11a [Source:MGI Symbol;Acc:MGI:3649094]
ENSMUSG00000073980	33.96	11.66	1.541	3.7579e-05	0.00069009	32	18	39	36	10	15	13	14	Gm9574	predicted gene 9574 [Source:MGI Symbol;Acc:MGI:3809525]
ENSMUSG00000030987	881.25	1769.65	-1.0053	3.7696e-05	0.0006915	536	559	1211	981	1552	2104	2032	2193	Stim1	stromal interaction molecule 1 [Source:MGI Symbol;Acc:MGI:107476]
ENSMUSG00000034295	67.38	159.06	-1.2447	3.7902e-05	0.00069429	66	72	49	57	89	181	259	193	Fhod3	formin homology 2 domain containing 3 [Source:MGI Symbol;Acc:MGI:1925847]
ENSMUSG00000032724	197.83	63.56	1.6395	3.8233e-05	0.00069949	293	136	141	139	76	54	44	103	Abtb2	ankyrin repeat and BTB (POZ) domain containing 2 [Source:MGI Symbol;Acc:MGI:2139365]
ENSMUSG00000037731	459.43	199.99	1.2018	3.8726e-05	0.00070676	418	252	651	382	233	195	178	268	Themis2	thymocyte selection associated family member 2 [Source:MGI Symbol;Acc:MGI:2446213]
ENSMUSG00000026820	943.65	373.22	1.3382	3.8908e-05	0.00070965	1426	677	636	636	401	427	418	396	Ptges2	prostaglandin E synthase 2 [Source:MGI Symbol;Acc:MGI:1917592]
ENSMUSG00000026110	3370.3	1586.33	1.0875	3.9398e-05	0.00071815	3506	2368	2877	3515	2170	1756	1440	1486	Mgat4a	mannoside acetylglucosaminyltransferase 4, isoenzyme A [Source:MGI Symbol;Acc:MGI:2662992]
ENSMUSG00000042250	43.08	0	8.0143	4.0572e-05	0.00073637	119	3	9	17	0	0	0	0	Pglyrp4	peptidoglycan recognition protein 4 [Source:MGI Symbol;Acc:MGI:2686324]
ENSMUSG00000024640	2085.96	639.54	1.7057	4.0562e-05	0.00073637	2864	2623	1182	760	747	657	736	656	Psat1	phosphoserine aminotransferase 1 [Source:MGI Symbol;Acc:MGI:2183441]
ENSMUSG00000045827	2698.26	1041.04	1.3745	4.1405e-05	0.0007501	1848	1363	4039	2835	1456	982	943	1103	Serpinb9	serine (or cysteine) peptidase inhibitor, clade B, member 9 [Source:MGI Symbol;Acc:MGI:106603]
ENSMUSG00000022211	11.54	36.76	-1.6639	4.236e-05	0.00076553	7	11	17	8	28	46	60	31	Carmil3	capping protein regulator and myosin 1 linker 3 [Source:MGI Symbol;Acc:MGI:2448573]
ENSMUSG00000042010	109.28	235.87	-1.1075	4.255e-05	0.0007685	54	95	151	108	168	283	304	306	Acacb	acetyl-Coenzyme A carboxylase beta [Source:MGI Symbol;Acc:MGI:2140940]
ENSMUSG00000026768	511.83	1148.9	-1.1674	4.3452e-05	0.00078383	514	575	393	371	624	1765	1420	1420	Itga8	integrin alpha 8 [Source:MGI Symbol;Acc:MGI:109442]
ENSMUSG00000052949	105.58	223.41	-1.0822	4.5316e-05	0.00081053	113	74	137	64	164	286	269	285	Rnf157	ring finger protein 157 [Source:MGI Symbol;Acc:MGI:2442484]
ENSMUSG00000087057	3.58	21.03	-2.5618	4.5304e-05	0.00081053	4	5	4	0	20	15	22	36	Gm11730	predicted gene 11730 [Source:MGI Symbol;Acc:MGI:3650941]
ENSMUSG00000109700	36.25	7.13	2.36	4.5941e-05	0.00082123	18	12	38	67	9	7	9	6	Gm21123	predicted gene, 21123 [Source:MGI Symbol;Acc:MGI:5434478]
ENSMUSG00000028487	120.96	265.73	-1.1346	4.6248e-05	0.00082621	72	106	163	109	160	389	374	282	Bnc2	basonuclin 2 [Source:MGI Symbol;Acc:MGI:2443805]
ENSMUSG00000067203	510.16	180.97	1.4965	4.6347e-05	0.00082748	250	260	711	691	198	163	167	266	H2-K2	histocompatibility 2, K region locus 2 [Source:MGI Symbol;Acc:MGI:95906]
ENSMUSG00000024958	671.19	1388.05	-1.0488	4.6666e-05	0.00083217	505	738	604	608	730	1773	1918	1895	Gpr137	G protein-coupled receptor 137 [Source:MGI Symbol;Acc:MGI:2147529]
ENSMUSG00000049971	18.8	1.56	3.5832	4.6772e-05	0.00083355	10	9	10	40	1	0	4	2	Glt1d1	glycosyltransferase 1 domain containing 1 [Source:MGI Symbol;Acc:MGI:2442755]
ENSMUSG00000037020	149.45	344.52	-1.203	4.6857e-05	0.00083458	101	82	195	178	329	336	327	533	Wdr62	WD repeat domain 62 [Source:MGI Symbol;Acc:MGI:1923696]
ENSMUSG00000035671	1241.17	595.18	1.061	4.7913e-05	0.00085229	840	712	1570	1490	649	672	718	577	Zswim4	zinc finger SWIM-type containing 4 [Source:MGI Symbol;Acc:MGI:2443726]
ENSMUSG00000114049	2.15	20.95	-3.2793	4.7938e-05	0.00085229	0	3	2	3	5	26	45	21	Gm48140	predicted gene, 48140 [Source:MGI Symbol;Acc:MGI:6097506]
ENSMUSG00000032375	157.93	325.57	-1.0413	4.7998e-05	0.00085283	108	99	241	142	271	436	382	366	Aph1b	aph1 homolog B, gamma secretase subunit [Source:MGI Symbol;Acc:MGI:3522097]
ENSMUSG00000048142	8.28	29	-1.8212	4.9581e-05	0.00087939	9	8	7	6	22	33	24	51	Nat8l	N-acetyltransferase 8-like [Source:MGI Symbol;Acc:MGI:2447776]
ENSMUSG00000048402	50.94	126.23	-1.316	5.0755e-05	0.0008986	54	61	39	30	72	167	172	162	Gli2	GLI-Kruppel family member GLI2 [Source:MGI Symbol;Acc:MGI:95728]
ENSMUSG00000097754	31.71	4.3	2.8522	5.0809e-05	0.00089885	56	22	14	20	1	11	2	6	Ptgs2os2	prostaglandin-endoperoxide synthase 2, opposite strand 2 [Source:MGI Symbol;Acc:MGI:5477181]
ENSMUSG00000021719	29.57	73.6	-1.3243	5.083e-05	0.00089885	28	40	23	16	54	103	92	82	Rgs7bp	regulator of G-protein signalling 7 binding protein [Source:MGI Symbol;Acc:MGI:106334]
ENSMUSG00000030623	13.19	42.04	-1.684	5.1521e-05	0.00090998	13	8	10	17	20	59	61	52	Prss23os	protease, serine 23, opposite strand [Source:MGI Symbol;Acc:MGI:1916654]
ENSMUSG00000020684	32	11.07	1.5135	5.2641e-05	0.00092866	34	28	25	29	7	12	17	14	Rasl10b	RAS-like, family 10, member B [Source:MGI Symbol;Acc:MGI:2685575]
ENSMUSG00000044165	97.83	14.87	2.7164	5.3583e-05	0.00094301	234	22	42	43	14	20	16	16	Bcl2l15	BCLl2-like 15 [Source:MGI Symbol;Acc:MGI:2685412]
ENSMUSG00000029601	8.53	30.94	-1.8359	5.4863e-05	0.00096327	2	10	12	8	37	32	27	39	Iqcd	IQ motif containing D [Source:MGI Symbol;Acc:MGI:1922982]
ENSMUSG00000094088	3.81	20.59	-2.422	5.6133e-05	0.00098439	1	7	3	3	28	25	16	20	Ighv1-64	immunoglobulin heavy variable 1-64 [Source:MGI Symbol;Acc:MGI:4439789]
ENSMUSG00000079012	57.7	7.43	2.9806	5.6509e-05	0.00098981	47	6	124	42	14	7	3	7	Serpina3m	serine (or cysteine) peptidase inhibitor, clade A, member 3M [Source:MGI Symbol;Acc:MGI:98378]
ENSMUSG00000053279	203.35	457.52	-1.1715	5.6707e-05	0.00099269	186	269	150	131	333	466	567	688	Aldh1a1	aldehyde dehydrogenase family 1, subfamily A1 [Source:MGI Symbol;Acc:MGI:1353450]
ENSMUSG00000022759	8.58	30.89	-1.8413	5.6828e-05	0.00099363	4	5	10	13	18	36	39	47	Lrrc74b	leucine rich repeat containing 74B [Source:MGI Symbol;Acc:MGI:1921935]
ENSMUSG00000020904	68.29	143.45	-1.0711	5.6909e-05	0.00099387	51	62	58	79	133	161	226	117	Cfap52	cilia and flagella associated protein 52 [Source:MGI Symbol;Acc:MGI:1919110]
ENSMUSG00000055413	867.54	392.01	1.1464	5.7161e-05	0.00099652	529	461	1181	1067	353	452	456	482	H2-Q5	histocompatibility 2, Q region locus 5 [Source:MGI Symbol;Acc:MGI:95934]
ENSMUSG00000021388	648.08	1335.08	-1.0436	5.7434e-05	0.0010007	761	605	477	495	861	1731	1583	1857	Aspn	asporin [Source:MGI Symbol;Acc:MGI:1913945]
ENSMUSG00000000305	96.69	229.84	-1.2474	5.7787e-05	0.0010062	65	53	106	134	216	269	345	190	Cdh4	cadherin 4 [Source:MGI Symbol;Acc:MGI:99218]
ENSMUSG00000025461	36.24	84.26	-1.2219	5.7837e-05	0.0010065	25	41	24	42	64	98	130	86	Scart1	scavenger receptor family member expressed on T cells 1 [Source:MGI Symbol;Acc:MGI:2443796]
ENSMUSG00000031089	4107.16	426.36	3.2682	5.8378e-05	0.0010141	9475	960	1610	2291	703	396	425	284	Slc6a14	solute carrier family 6 (neurotransmitter transporter), member 14 [Source:MGI Symbol;Acc:MGI:1890216]
ENSMUSG00000040209	941.28	1915.15	-1.0248	5.8683e-05	0.001018	550	814	978	1136	1214	2879	2459	2117	Zfp704	zinc finger protein 704 [Source:MGI Symbol;Acc:MGI:2180715]
ENSMUSG00000028957	209.97	458.58	-1.1279	5.8702e-05	0.001018	128	261	190	191	259	644	565	615	Per3	period circadian clock 3 [Source:MGI Symbol;Acc:MGI:1277134]
ENSMUSG00000032496	42066.2	9762.14	2.1074	5.8758e-05	0.0010184	86358	28744	21460	11078	9593	11726	12504	9386	Ltf	lactotransferrin [Source:MGI Symbol;Acc:MGI:96837]
ENSMUSG00000003865	2662.07	1305.92	1.028	5.9886e-05	0.0010367	1801	1721	3276	3079	1618	1324	1248	1493	Gys1	glycogen synthase 1, muscle [Source:MGI Symbol;Acc:MGI:101805]
ENSMUSG00000021448	4.55	19.71	-2.1033	6.0082e-05	0.0010395	2	4	6	5	13	28	20	28	Shc3	src homology 2 domain-containing transforming protein C3 [Source:MGI Symbol;Acc:MGI:106179]
ENSMUSG00000039391	35.87	8.44	2.0627	6.0845e-05	0.0010514	29	43	22	36	2	7	19	11	Ccdc81	coiled-coil domain containing 81 [Source:MGI Symbol;Acc:MGI:1918134]
ENSMUSG00000027420	18.95	44.42	-1.2179	6.1098e-05	0.0010547	15	16	24	15	49	48	50	48	Bfsp1	beaded filament structural protein 1, in lens-CP94 [Source:MGI Symbol;Acc:MGI:101770]
ENSMUSG00000040181	713.32	242.7	1.5541	6.1437e-05	0.0010598	1040	297	657	584	129	303	372	300	Fmo1	flavin containing monooxygenase 1 [Source:MGI Symbol;Acc:MGI:1310002]
ENSMUSG00000062345	329.94	3.27	6.6866	6.1769e-05	0.0010649	394	259	342	205	12	0	0	0	Serpinb2	serine (or cysteine) peptidase inhibitor, clade B, member 2 [Source:MGI Symbol;Acc:MGI:97609]
ENSMUSG00000041729	194	622.03	-1.6798	6.2663e-05	0.0010791	178	59	348	142	709	581	561	871	Coro2b	coronin, actin binding protein, 2B [Source:MGI Symbol;Acc:MGI:2444283]
ENSMUSG00000078780	28.78	5.61	2.4114	6.3128e-05	0.0010858	17	26	38	26	12	3	7	1	Gm5150	predicted gene 5150 [Source:MGI Symbol;Acc:MGI:3779469]
ENSMUSG00000021281	19282.6	5460.25	1.8203	6.3396e-05	0.0010892	20794	4643	24296	21372	8232	4542	4324	6244	Tnfaip2	tumor necrosis factor, alpha-induced protein 2 [Source:MGI Symbol;Acc:MGI:104960]
ENSMUSG00000033768	36.14	87.31	-1.2793	6.339e-05	0.0010892	36	48	21	25	86	87	116	97	Nrxn2	neurexin II [Source:MGI Symbol;Acc:MGI:1096362]
ENSMUSG00000028989	1917.78	4405.19	-1.1999	6.4475e-05	0.0011058	1595	2260	2095	1076	2348	6440	5806	5461	Angptl7	angiopoietin-like 7 [Source:MGI Symbol;Acc:MGI:3605801]
ENSMUSG00000062866	358.58	775.79	-1.1126	6.4861e-05	0.0011105	237	228	567	310	558	1082	1005	847	Phactr2	phosphatase and actin regulator 2 [Source:MGI Symbol;Acc:MGI:2446138]
ENSMUSG00000046108	134.05	3.54	5.2523	6.5392e-05	0.001117	383	4	23	49	6	4	4	1	Il17c	interleukin 17C [Source:MGI Symbol;Acc:MGI:2446486]
ENSMUSG00000043587	89.36	493.01	-2.465	6.5428e-05	0.001117	41	203	38	40	117	764	776	628	Pxylp1	2-phosphoxylose phosphatase 1 [Source:MGI Symbol;Acc:MGI:2442444]
ENSMUSG00000028362	26.36	7.99	1.7301	6.5744e-05	0.0011211	29	16	24	27	9	7	7	12	Tnfsf8	tumor necrosis factor (ligand) superfamily, member 8 [Source:MGI Symbol;Acc:MGI:88328]
ENSMUSG00000022456	7.76	27	-1.8118	6.5978e-05	0.0011237	11	3	6	8	25	35	36	24	Septin3	septin 3 [Source:MGI Symbol;Acc:MGI:1345148]
ENSMUSG00000040543	151.59	378.4	-1.3209	6.6457e-05	0.001128	86	198	112	158	206	625	434	458	Pitpnm3	PITPNM family member 3 [Source:MGI Symbol;Acc:MGI:2685726]
ENSMUSG00000024524	181.58	62.61	1.5368	6.6571e-05	0.0011293	102	77	290	214	51	76	95	58	Gnal	guanine nucleotide binding protein, alpha stimulating, olfactory type [Source:MGI Symbol;Acc:MGI:95774]
ENSMUSG00000017400	665.4	272.01	1.2923	6.67e-05	0.0011308	339	416	884	847	354	266	272	287	Stac2	SH3 and cysteine rich domain 2 [Source:MGI Symbol;Acc:MGI:2144518]
ENSMUSG00000074093	96.19	209.34	-1.1237	6.6815e-05	0.0011321	65	133	80	73	162	278	298	201	Svip	small VCP/p97-interacting protein [Source:MGI Symbol;Acc:MGI:1922994]
ENSMUSG00000027765	24.49	68.99	-1.5018	6.6995e-05	0.0011345	19	36	20	14	39	78	101	95	P2ry1	purinergic receptor P2Y, G-protein coupled 1 [Source:MGI Symbol;Acc:MGI:105049]
ENSMUSG00000039058	54.15	129.28	-1.2575	6.7439e-05	0.0011414	63	44	67	24	102	166	136	175	Ak5	adenylate kinase 5 [Source:MGI Symbol;Acc:MGI:2677491]
ENSMUSG00000031465	1122.82	348.83	1.6879	6.7731e-05	0.0011444	581	600	1887	1164	571	228	343	336	Angpt2	angiopoietin 2 [Source:MGI Symbol;Acc:MGI:1202890]
ENSMUSG00000070423	20.08	62.19	-1.6318	6.8497e-05	0.0011554	17	27	17	12	70	43	54	105	Olfr558	olfactory receptor 558 [Source:MGI Symbol;Acc:MGI:3030392]
ENSMUSG00000094796	48.16	21.68	1.1548	6.9528e-05	0.0011707	41	42	54	40	21	26	18	31	BC147527	cDNA sequence BC147527 [Source:MGI Symbol;Acc:MGI:4840510]
ENSMUSG00000037989	208.76	696.76	-1.7398	7.0841e-05	0.0011908	150	331	123	151	254	1286	944	726	Wnk2	WNK lysine deficient protein kinase 2 [Source:MGI Symbol;Acc:MGI:1922857]
ENSMUSG00000025026	1608.12	3560.61	-1.1464	7.0817e-05	0.0011908	905	994	2217	1891	4297	3622	3687	3921	Add3	adducin 3 (gamma) [Source:MGI Symbol;Acc:MGI:1351615]
ENSMUSG00000056418	12.45	36.99	-1.5733	7.1546e-05	0.001202	9	13	16	8	21	50	57	40	BC043934	cDNA sequence BC043934 [Source:MGI Symbol;Acc:MGI:2679715]
ENSMUSG00000050447	35.73	80.93	-1.1884	7.2179e-05	0.0012099	45	31	30	23	64	81	113	104	Lypd6	LY6/PLAUR domain containing 6 [Source:MGI Symbol;Acc:MGI:2443848]
ENSMUSG00000028076	91.25	215.47	-1.2386	7.3563e-05	0.0012317	83	50	138	68	142	253	246	331	Cd1d1	CD1d1 antigen [Source:MGI Symbol;Acc:MGI:107674]
ENSMUSG00000039747	885.48	318.36	1.4755	7.3919e-05	0.0012363	1125	274	1022	817	258	442	369	356	Orai2	ORAI calcium release-activated calcium modulator 2 [Source:MGI Symbol;Acc:MGI:2443195]
ENSMUSG00000095457	25.16	8.2	1.6268	7.4108e-05	0.0012382	21	19	21	31	9	9	9	9	Gvin-ps5	GTPase, very large interferon inducible, pseudogene 5 [Source:MGI Symbol;Acc:MGI:3704114]
ENSMUSG00000089769	10.12	30.67	-1.61	7.5209e-05	0.0012536	9	7	9	12	18	37	38	46	Gm16574	predicted gene 16574 [Source:MGI Symbol;Acc:MGI:4414994]
ENSMUSG00000044734	1223.82	361.37	1.7596	7.5746e-05	0.0012611	2008	1168	793	379	326	409	535	337	Serpinb1a	serine (or cysteine) peptidase inhibitor, clade B, member 1a [Source:MGI Symbol;Acc:MGI:1913472]
ENSMUSG00000004791	725.27	244.19	1.5711	7.7132e-05	0.0012827	379	289	909	1133	247	277	200	354	Pgf	placental growth factor [Source:MGI Symbol;Acc:MGI:105095]
ENSMUSG00000021453	5700.64	2813.18	1.019	7.7326e-05	0.0012852	4463	7204	4077	4965	3089	2618	3904	2737	Gadd45g	growth arrest and DNA-damage-inducible 45 gamma [Source:MGI Symbol;Acc:MGI:1346325]
ENSMUSG00000020227	2120.1	773.83	1.4542	7.7846e-05	0.0012931	2431	690	2752	1931	830	845	678	1050	Irak3	interleukin-1 receptor-associated kinase 3 [Source:MGI Symbol;Acc:MGI:1921164]
ENSMUSG00000035916	10.58	44.28	-2.0665	7.8394e-05	0.0013008	15	2	17	5	26	68	55	52	Ptprq	protein tyrosine phosphatase, receptor type, Q [Source:MGI Symbol;Acc:MGI:1096349]
ENSMUSG00000002908	25.89	60.58	-1.2388	7.8574e-05	0.0013026	31	24	15	23	52	69	64	85	Kcnn1	potassium intermediate/small conductance calcium-activated channel, subfamily N, member 1 [Source:MGI Symbol;Acc:MGI:1933993]
ENSMUSG00000023931	101.63	48.19	1.0682	7.8588e-05	0.0013026	96	72	89	114	30	59	73	56	Efhb	EF hand domain family, member B [Source:MGI Symbol;Acc:MGI:3045296]
ENSMUSG00000038147	120.39	248.28	-1.041	7.8827e-05	0.0013058	105	66	174	102	271	278	269	273	Cd84	CD84 antigen [Source:MGI Symbol;Acc:MGI:1336885]
ENSMUSG00000034687	34.31	75.07	-1.1367	7.9163e-05	0.0013106	34	36	34	21	54	108	100	76	Fras1	Fraser extracellular matrix complex subunit 1 [Source:MGI Symbol;Acc:MGI:2385368]
ENSMUSG00000017950	2.92	24.6	-3.0583	7.9553e-05	0.0013149	2	1	5	3	11	16	16	69	Hnf4a	hepatic nuclear factor 4, alpha [Source:MGI Symbol;Acc:MGI:109128]
ENSMUSG00000051413	701.57	347.52	1.0127	7.9715e-05	0.0013168	577	415	907	699	232	499	366	472	Plagl2	pleiomorphic adenoma gene-like 2 [Source:MGI Symbol;Acc:MGI:1933165]
ENSMUSG00000050440	12.57	0.21	5.5227	8.0363e-05	0.0013253	2	2	21	23	0	0	0	1	Hamp	hepcidin antimicrobial peptide [Source:MGI Symbol;Acc:MGI:1933533]
ENSMUSG00000049723	111.63	38.32	1.5482	8.2539e-05	0.0013589	49	59	157	154	43	41	36	48	Mmp12	matrix metallopeptidase 12 [Source:MGI Symbol;Acc:MGI:97005]
ENSMUSG00000053475	118.13	42.26	1.4885	8.3364e-05	0.0013702	151	94	81	99	59	34	60	29	Tnfaip6	tumor necrosis factor alpha induced protein 6 [Source:MGI Symbol;Acc:MGI:1195266]
ENSMUSG00000106224	11.94	48.66	-2.0278	8.3338e-05	0.0013702	4	11	8	21	24	65	90	43	Gm43823	predicted gene 43823 [Source:MGI Symbol;Acc:MGI:5663960]
ENSMUSG00000006488	87.74	11.48	2.9479	8.3337e-05	0.0013702	16	24	73	215	21	6	7	14	Prl7a1	prolactin family 7, subfamily a, member 1 [Source:MGI Symbol;Acc:MGI:1206572]
ENSMUSG00000085114	79.21	16.7	2.2468	8.375e-05	0.0013758	31	46	59	157	15	9	13	37	1600025M17Rik	RIKEN cDNA 1600025M17 gene [Source:MGI Symbol;Acc:MGI:1919280]
ENSMUSG00000030518	7.33	25.19	-1.7697	8.4037e-05	0.0013797	5	5	7	10	30	27	32	21	Fam189a1	family with sequence similarity 189, member A1 [Source:MGI Symbol;Acc:MGI:1917888]
ENSMUSG00000027977	1.92	14.02	-2.8849	8.4408e-05	0.0013851	2	2	2	1	7	21	22	14	Ndst3	N-deacetylase/N-sulfotransferase (heparan glucosaminyl) 3 [Source:MGI Symbol;Acc:MGI:1932544]
ENSMUSG00000033610	28.05	66.72	-1.2401	8.4895e-05	0.0013923	15	23	31	35	78	82	76	56	Pank1	pantothenate kinase 1 [Source:MGI Symbol;Acc:MGI:1922985]
ENSMUSG00000067006	1033.92	435.5	1.2484	8.5796e-05	0.0014063	993	1241	692	810	639	462	380	388	Serpinb5	serine (or cysteine) peptidase inhibitor, clade B, member 5 [Source:MGI Symbol;Acc:MGI:109579]
ENSMUSG00000063851	198.68	67.33	1.5634	8.6498e-05	0.0014154	304	173	121	110	91	68	70	62	Rnf183	ring finger protein 183 [Source:MGI Symbol;Acc:MGI:1923322]
ENSMUSG00000017639	25.62	59.3	-1.2036	8.6779e-05	0.0014181	13	31	32	19	56	67	78	62	Rab11fip4	RAB11 family interacting protein 4 (class II) [Source:MGI Symbol;Acc:MGI:2442920]
ENSMUSG00000035235	447.61	206.88	1.1117	8.8159e-05	0.0014371	600	353	321	335	160	280	270	218	Trim13	tripartite motif-containing 13 [Source:MGI Symbol;Acc:MGI:1913847]
ENSMUSG00000021347	2047.81	720.13	1.5078	8.816e-05	0.0014371	905	1385	1578	3694	635	632	901	1033	Prl7b1	prolactin family 7, subfamily b, member 1 [Source:MGI Symbol;Acc:MGI:1922846]
ENSMUSG00000019122	2413.61	938.17	1.3631	8.8293e-05	0.0014384	3513	2114	1929	1102	836	1034	1381	923	Ccl9	chemokine (C-C motif) ligand 9 [Source:MGI Symbol;Acc:MGI:104533]
ENSMUSG00000106609	8.26	0.27	4.9183	8.9029e-05	0.0014488	6	6	15	4	1	0	0	0	Gm43181	predicted gene 43181 [Source:MGI Symbol;Acc:MGI:5663318]
ENSMUSG00000010529	119.82	38.45	1.6412	8.9705e-05	0.0014571	192	71	81	84	46	46	50	26	Gm266	predicted gene 266 [Source:MGI Symbol;Acc:MGI:2685112]
ENSMUSG00000023094	153.47	457.47	-1.5768	9.0023e-05	0.0014606	106	273	109	68	300	556	613	596	Msrb2	methionine sulfoxide reductase B2 [Source:MGI Symbol;Acc:MGI:1923717]
ENSMUSG00000111857	15.8	3.22	2.3096	9.0301e-05	0.0014631	16	18	10	13	4	4	2	4	1190001M18Rik	RIKEN cDNA 1190001M18 gene [Source:MGI Symbol;Acc:MGI:1916174]
ENSMUSG00000032607	86.21	181.55	-1.079	9.1383e-05	0.0014782	80	78	61	94	111	285	195	232	Amt	aminomethyltransferase [Source:MGI Symbol;Acc:MGI:3646700]
ENSMUSG00000022523	2.7	14.75	-2.4423	9.2695e-05	0.0014937	2	1	3	4	12	20	15	19	Fgf12	fibroblast growth factor 12 [Source:MGI Symbol;Acc:MGI:109183]
ENSMUSG00000031342	915.1	414.72	1.1407	9.3927e-05	0.0015119	899	871	984	591	230	503	723	428	Gpm6b	glycoprotein m6b [Source:MGI Symbol;Acc:MGI:107672]
ENSMUSG00000026360	694.82	2742.75	-1.9805	9.5047e-05	0.0015275	233	399	1614	423	3082	2494	1784	4649	Rgs2	regulator of G-protein signaling 2 [Source:MGI Symbol;Acc:MGI:1098271]
ENSMUSG00000021238	1452.51	2932.24	-1.0138	9.5617e-05	0.0015358	1233	1657	1125	1266	1652	4117	4196	3358	Aldh6a1	aldehyde dehydrogenase family 6, subfamily A1 [Source:MGI Symbol;Acc:MGI:1915077]
ENSMUSG00000099590	36.01	8.75	2.0471	9.6988e-05	0.0015553	49	36	13	30	11	7	7	13	C330022C24Rik	RIKEN cDNA C330022C24 gene [Source:MGI Symbol;Acc:MGI:1925770]
ENSMUSG00000034593	1177.7	2829.99	-1.2646	9.7349e-05	0.0015602	769	503	1707	1425	2314	3673	2956	3711	Myo5a	myosin VA [Source:MGI Symbol;Acc:MGI:105976]
ENSMUSG00000050350	26.73	7.04	1.9589	9.8242e-05	0.0015718	17	14	40	29	11	5	7	7	Gpr18	G protein-coupled receptor 18 [Source:MGI Symbol;Acc:MGI:107859]
ENSMUSG00000068270	229.78	524.69	-1.1911	9.9562e-05	0.0015888	120	207	260	265	271	754	759	607	Shroom4	shroom family member 4 [Source:MGI Symbol;Acc:MGI:2685570]
ENSMUSG00000105843	6.95	25.77	-1.877	0.00010016	0.0015966	6	3	12	5	21	23	30	41	Gm19439	predicted gene, 19439 [Source:MGI Symbol;Acc:MGI:5011624]
ENSMUSG00000058435	11.51	0.85	3.692	0.00010037	0.001599	15	4	13	10	0	2	1	1	Btnl4	butyrophilin-like 4 [Source:MGI Symbol;Acc:MGI:1932036]
ENSMUSG00000043613	1233.76	143.42	3.1065	0.00010188	0.0016205	927	1141	1322	1149	369	28	85	88	Mmp3	matrix metallopeptidase 3 [Source:MGI Symbol;Acc:MGI:97010]
ENSMUSG00000004814	74.85	27.15	1.4646	0.00010284	0.0016331	96	78	56	39	30	23	28	38	Ccl24	chemokine (C-C motif) ligand 24 [Source:MGI Symbol;Acc:MGI:1928953]
ENSMUSG00000052837	3727.22	1390.5	1.423	0.00010418	0.0016527	2880	2835	4102	3919	2521	1156	1094	1060	Junb	jun B proto-oncogene [Source:MGI Symbol;Acc:MGI:96647]
ENSMUSG00000097373	23.91	2.8	3.1124	0.00010439	0.0016551	36	30	4	14	4	1	5	2	Gm26877	predicted gene, 26877 [Source:MGI Symbol;Acc:MGI:5477371]
ENSMUSG00000018470	11.29	39.88	-1.7989	0.00010456	0.001657	5	6	23	9	37	41	63	36	Kcnab3	potassium voltage-gated channel, shaker-related subfamily, beta member 3 [Source:MGI Symbol;Acc:MGI:1336208]
ENSMUSG00000090939	4.21	28.39	-2.7369	0.00010499	0.0016629	1	2	7	6	6	52	46	28	Gm17147	predicted gene 17147 [Source:MGI Symbol;Acc:MGI:4937974]
ENSMUSG00000075318	20.87	52.85	-1.3504	0.00010545	0.0016691	24	15	21	16	31	83	71	55	Scn2a	sodium channel, voltage-gated, type II, alpha [Source:MGI Symbol;Acc:MGI:98248]
ENSMUSG00000030731	4.91	19.13	-1.9618	0.0001055	0.0016691	3	5	4	6	18	29	20	18	Syt3	synaptotagmin III [Source:MGI Symbol;Acc:MGI:99665]
ENSMUSG00000059708	72.2	151.15	-1.0686	0.00010603	0.0016766	52	82	74	57	90	242	172	182	Akap17b	A kinase (PRKA) anchor protein 17B [Source:MGI Symbol;Acc:MGI:2443758]
ENSMUSG00000004040	11140.7	5325.83	1.0648	0.00010687	0.0016882	7061	6434	16126	11998	6079	5529	6082	5633	Stat3	signal transducer and activator of transcription 3 [Source:MGI Symbol;Acc:MGI:103038]
ENSMUSG00000110170	4.44	20.53	-2.2339	0.00010748	0.0016969	6	4	4	2	9	32	23	30	St6galnac2	ST6 (alpha-N-acetyl-neuraminyl-2,3-beta-galactosyl-1,3)-N-acetylgalactosaminide alpha-2,6-sialyltransferase 2 [Source:MGI Symbol;Acc:MGI:107553]
ENSMUSG00000040963	5.08	22.84	-2.1969	0.00010827	0.0017084	8	4	2	4	19	30	15	38	Asgr2	asialoglycoprotein receptor 2 [Source:MGI Symbol;Acc:MGI:88082]
ENSMUSG00000037033	312.43	114.98	1.4458	0.00010935	0.0017209	346	160	427	218	173	104	128	87	Clca3b	chloride channel accessory 3B [Source:MGI Symbol;Acc:MGI:2181989]
ENSMUSG00000056054	835.63	61.59	3.7652	0.00011192	0.0017573	1313	452	644	587	174	28	31	8	S100a8	S100 calcium binding protein A8 (calgranulin A) [Source:MGI Symbol;Acc:MGI:88244]
ENSMUSG00000115099	1.65	13.15	-3.0141	0.00011196	0.0017573	1	2	1	2	7	24	16	13	1700087I21Rik	RIKEN cDNA 1700087I21 gene [Source:MGI Symbol;Acc:MGI:1923869]
ENSMUSG00000048038	6.33	26.74	-2.0872	0.00011249	0.0017638	5	9	5	4	21	40	45	14	Ccdc187	coiled-coil domain containing 187 [Source:MGI Symbol;Acc:MGI:3045295]
ENSMUSG00000109297	11.34	0.42	4.6486	0.00011528	0.0018055	7	15	4	15	0	1	0	1	Gm31522	predicted gene, 31522 [Source:MGI Symbol;Acc:MGI:5590681]
ENSMUSG00000020592	2283.52	844.67	1.4346	0.00011556	0.0018089	3826	1315	1707	1308	672	1022	1091	996	Sdc1	syndecan 1 [Source:MGI Symbol;Acc:MGI:1349162]
ENSMUSG00000005672	2150.1	485.21	2.1484	0.00011648	0.0018224	735	599	3806	3038	856	413	333	439	Kit	KIT proto-oncogene receptor tyrosine kinase [Source:MGI Symbol;Acc:MGI:96677]
ENSMUSG00000085894	171.4	60.59	1.4942	0.00011658	0.001823	207	95	148	172	24	81	108	65	Gm15832	predicted gene 15832 [Source:MGI Symbol;Acc:MGI:3834078]
ENSMUSG00000028369	4017.08	9407.57	-1.2276	0.0001173	0.0018333	3035	1801	6519	3683	7851	12270	9173	12727	Svep1	sushi, von Willebrand factor type A, EGF and pentraxin domain containing 1 [Source:MGI Symbol;Acc:MGI:1928849]
ENSMUSG00000069170	27.28	7.97	1.7664	0.00011892	0.0018547	19	16	31	35	5	9	7	15	Adgrv1	adhesion G protein-coupled receptor V1 [Source:MGI Symbol;Acc:MGI:1274784]
ENSMUSG00000058589	17.89	4.83	1.905	0.00011934	0.0018593	18	17	15	15	6	4	5	6	Anks1b	ankyrin repeat and sterile alpha motif domain containing 1B [Source:MGI Symbol;Acc:MGI:1924781]
ENSMUSG00000035919	88.78	193	-1.115	0.00012169	0.001889	49	60	116	106	228	192	237	186	Bbs9	Bardet-Biedl syndrome 9 (human) [Source:MGI Symbol;Acc:MGI:2442833]
ENSMUSG00000024087	390.24	192.24	1.0209	0.00012487	0.0019312	302	393	457	285	151	171	340	198	Cyp1b1	cytochrome P450, family 1, subfamily b, polypeptide 1 [Source:MGI Symbol;Acc:MGI:88590]
ENSMUSG00000095649	19.34	4.54	2.098	0.00012735	0.0019624	19	8	20	24	5	7	4	4	Gvin-ps3	GTPase, very large interferon inducible, pseudogene 3 [Source:MGI Symbol;Acc:MGI:3703149]
ENSMUSG00000091457	121.43	20.99	2.547	0.00012794	0.0019698	33	122	151	148	49	12	20	4	Gm17171	predicted gene 17171 [Source:MGI Symbol;Acc:MGI:4937998]
ENSMUSG00000024659	32795.8	14327.7	1.1947	0.000128	0.0019698	45151	32034	19289	20708	12081	16716	17746	17392	Anxa1	annexin A1 [Source:MGI Symbol;Acc:MGI:96819]
ENSMUSG00000036411	37.08	90.45	-1.2911	0.00012865	0.0019783	28	55	32	20	61	118	118	111	9530077C05Rik	RIKEN cDNA 9530077C05 gene [Source:MGI Symbol;Acc:MGI:1915533]
ENSMUSG00000043421	2156.45	546.37	1.9812	0.00012875	0.0019789	967	506	3254	3407	832	469	467	566	Hilpda	hypoxia inducible lipid droplet associated [Source:MGI Symbol;Acc:MGI:1916823]
ENSMUSG00000027221	192.69	67.52	1.5096	0.00012889	0.0019799	182	253	143	119	41	60	61	143	Chst1	carbohydrate sulfotransferase 1 [Source:MGI Symbol;Acc:MGI:1924219]
ENSMUSG00000022867	2587.54	1247.17	1.0532	0.00012925	0.0019844	1867	1287	3660	2830	1287	1420	1409	1385	Usp25	ubiquitin specific peptidase 25 [Source:MGI Symbol;Acc:MGI:1353655]
ENSMUSG00000101625	18.69	3.95	2.2224	0.00012935	0.001985	20	9	26	14	2	4	8	4	Gm29371	predicted gene 29371 [Source:MGI Symbol;Acc:MGI:5580077]
ENSMUSG00000073565	52.28	20.69	1.3238	0.00013035	0.0019973	48	56	54	33	11	21	32	30	Prr16	proline rich 16 [Source:MGI Symbol;Acc:MGI:1918623]
ENSMUSG00000109729	14.87	2.34	2.6168	0.0001315	0.0020116	15	7	21	12	0	4	3	4	Gm45418	predicted gene 45418 [Source:MGI Symbol;Acc:MGI:5791254]
ENSMUSG00000036875	35.99	83.77	-1.219	0.00013253	0.0020244	21	42	42	28	55	142	93	89	Dna2	DNA replication helicase/nuclease 2 [Source:MGI Symbol;Acc:MGI:2443732]
ENSMUSG00000057098	153.5	350.5	-1.1912	0.00013247	0.0020244	164	117	213	71	286	410	512	359	Ebf1	early B cell factor 1 [Source:MGI Symbol;Acc:MGI:95275]
ENSMUSG00000070867	740.43	1835.65	-1.3096	0.00013322	0.0020318	260	757	922	823	1527	2329	2826	1522	Trabd2b	TraB domain containing 2B [Source:MGI Symbol;Acc:MGI:3650152]
ENSMUSG00000029762	1601.14	510.29	1.6505	0.00013371	0.0020381	2301	1004	1096	1344	920	403	459	359	Akr1b8	aldo-keto reductase family 1, member B8 [Source:MGI Symbol;Acc:MGI:107673]
ENSMUSG00000037337	25.16	60.26	-1.2518	0.00013392	0.0020403	15	17	25	36	68	61	59	76	Map4k1	mitogen-activated protein kinase kinase kinase kinase 1 [Source:MGI Symbol;Acc:MGI:1346882]
ENSMUSG00000006014	141.35	54.32	1.3775	0.0001341	0.002041	183	124	121	82	45	39	63	95	Prg4	proteoglycan 4 (megakaryocyte stimulating factor, articular superficial zone protein) [Source:MGI Symbol;Acc:MGI:1891344]
ENSMUSG00000015533	3553.31	1323.17	1.4251	0.00013516	0.0020549	3792	1031	4575	3711	1023	1747	1413	1750	Itga2	integrin alpha 2 [Source:MGI Symbol;Acc:MGI:96600]
ENSMUSG00000097899	5.9	22.41	-1.9087	0.00013526	0.0020555	3	3	7	9	22	18	32	27	Gm16894	predicted gene, 16894 [Source:MGI Symbol;Acc:MGI:4439818]
ENSMUSG00000022965	2454.83	1139.5	1.1072	0.00013647	0.0020695	3472	1708	1882	1763	1204	1421	1157	1239	Ifngr2	interferon gamma receptor 2 [Source:MGI Symbol;Acc:MGI:107654]
ENSMUSG00000085609	23.51	6.33	1.923	0.00013853	0.0020986	17	22	19	28	10	7	8	2	1700016P03Rik	RIKEN cDNA 1700016P03 gene [Source:MGI Symbol;Acc:MGI:1922792]
ENSMUSG00000102615	16.31	47.08	-1.5414	0.00013919	0.0021065	24	9	17	9	29	58	60	66	Gm37844	predicted gene, 37844 [Source:MGI Symbol;Acc:MGI:5611072]
ENSMUSG00000027913	57.66	8.34	2.8251	0.00013997	0.0021161	30	21	66	98	22	2	6	3	Crct1	cysteine-rich C-terminal 1 [Source:MGI Symbol;Acc:MGI:1921425]
ENSMUSG00000050103	13.45	44.76	-1.7169	0.00014036	0.0021209	5	7	24	15	43	41	42	72	Agmo	alkylglycerol monooxygenase [Source:MGI Symbol;Acc:MGI:2442495]
ENSMUSG00000040276	15.4	3.27	2.2754	0.00014056	0.0021228	13	12	21	11	5	5	2	2	Pacsin1	protein kinase C and casein kinase substrate in neurons 1 [Source:MGI Symbol;Acc:MGI:1345181]
ENSMUSG00000061762	36.83	3.76	3.3078	0.00014111	0.0021279	94	16	10	7	6	4	3	3	Tac1	tachykinin 1 [Source:MGI Symbol;Acc:MGI:98474]
ENSMUSG00000086712	16.25	49.54	-1.6227	0.00014403	0.0021676	26	13	12	7	41	48	54	78	Mexis	macrophage expressed LXRa(NR1H3)-dependent amplifier of Abca1 transcription lncRNA [Source:MGI Symbol;Acc:MGI:2140270]
ENSMUSG00000048988	22.44	3.09	2.8539	0.00014451	0.0021715	12	5	40	28	2	7	1	4	Elfn1	leucine rich repeat and fibronectin type III, extracellular 1 [Source:MGI Symbol;Acc:MGI:2442479]
ENSMUSG00000036192	44.72	102.28	-1.1949	0.00014499	0.0021772	28	37	45	55	57	147	154	107	Rorb	RAR-related orphan receptor beta [Source:MGI Symbol;Acc:MGI:1343464]
ENSMUSG00000105366	76.59	28.76	1.4008	0.00014579	0.0021873	94	65	55	62	14	30	36	51	Gm43719	predicted gene 43719 [Source:MGI Symbol;Acc:MGI:5663856]
ENSMUSG00000073538	4.14	24.53	-2.5794	0.00014623	0.0021929	5	2	3	5	10	17	24	61	E330020D12Rik	Riken cDNA E330020D12 gene [Source:MGI Symbol;Acc:MGI:3761270]
ENSMUSG00000040511	6393.77	1778.34	1.8463	0.00014651	0.0021959	2579	1715	9650	10194	2284	1765	1615	2052	Pvr	poliovirus receptor [Source:MGI Symbol;Acc:MGI:107741]
ENSMUSG00000042406	7255.59	3505.63	1.0495	0.00014778	0.0022106	8261	7942	5299	4653	4180	3430	4165	3525	Atf4	activating transcription factor 4 [Source:MGI Symbol;Acc:MGI:88096]
ENSMUSG00000097287	19.32	47.36	-1.2988	0.00014792	0.0022115	15	15	19	22	27	66	52	70	D130017N08Rik	RIKEN cDNA D130017N08 gene [Source:MGI Symbol;Acc:MGI:2443273]
ENSMUSG00000029055	120.09	273.33	-1.1876	0.0001486	0.0022194	61	163	96	120	173	401	341	322	Plch2	phospholipase C, eta 2 [Source:MGI Symbol;Acc:MGI:2443078]
ENSMUSG00000117146	45.93	103.08	-1.159	0.00014874	0.0022203	27	40	63	41	113	116	147	77	Fut4-ps1	fucosyltransferase 4, pseudogene 1 [Source:MGI Symbol;Acc:MGI:104647]
ENSMUSG00000021223	631.06	1440.8	-1.1906	0.00014932	0.0022268	388	332	1019	630	999	1782	1721	1987	Papln	papilin, proteoglycan-like sulfated glycoprotein [Source:MGI Symbol;Acc:MGI:2386139]
ENSMUSG00000092528	0.79	12.09	-3.9014	0.00014986	0.0022326	0	0	1	2	7	23	16	9	Nlrp1c-ps	NLR family, pyrin domain containing 1C, pseudogene [Source:MGI Symbol;Acc:MGI:3582962]
ENSMUSG00000118314	3.19	17.01	-2.379	0.00015053	0.0022404	1	3	5	3	25	18	13	17	1700001K23Rik	RIKEN cDNA 1700001K23 gene [Source:MGI Symbol;Acc:MGI:1916569]
ENSMUSG00000024177	18.53	49.26	-1.4067	0.000151	0.002245	12	27	20	9	55	49	62	50	Nme4	NME/NM23 nucleoside diphosphate kinase 4 [Source:MGI Symbol;Acc:MGI:1931148]
ENSMUSG00000030844	100.76	213.53	-1.0845	0.00015231	0.0022622	98	124	69	73	259	218	255	199	Rgs10	regulator of G-protein signalling 10 [Source:MGI Symbol;Acc:MGI:1915115]
ENSMUSG00000040010	2328.56	923.64	1.3345	0.00015299	0.0022711	2953	2028	2026	1404	1462	835	827	808	Slc7a5	solute carrier family 7 (cationic amino acid transporter, y+ system), member 5 [Source:MGI Symbol;Acc:MGI:1298205]
ENSMUSG00000001520	48.34	120.02	-1.3056	0.00015346	0.0022771	38	23	81	39	123	116	117	173	Nrip2	nuclear receptor interacting protein 2 [Source:MGI Symbol;Acc:MGI:1891884]
ENSMUSG00000109904	13.82	43.25	-1.6379	0.00015683	0.0023236	8	9	24	11	22	58	49	68	Gm45819	predicted gene 45819 [Source:MGI Symbol;Acc:MGI:5804934]
ENSMUSG00000063130	957.4	2418.95	-1.3374	0.00015757	0.0023334	578	1491	686	730	1261	3289	2979	3484	Calml3	calmodulin-like 3 [Source:MGI Symbol;Acc:MGI:1917655]
ENSMUSG00000020435	37.2	106.94	-1.5183	0.0001588	0.0023503	29	9	55	46	102	122	138	112	Osbp2	oxysterol binding protein 2 [Source:MGI Symbol;Acc:MGI:1921559]
ENSMUSG00000044364	12.07	1.88	2.7241	0.0001602	0.0023698	12	7	10	15	3	1	2	2	Tmem74b	transmembrane protein 74B [Source:MGI Symbol;Acc:MGI:1918629]
ENSMUSG00000029368	206.72	825.32	-1.9975	0.00016027	0.0023698	161	289	205	100	442	465	518	2311	Alb	albumin [Source:MGI Symbol;Acc:MGI:87991]
ENSMUSG00000026387	6.76	23.77	-1.804	0.00016068	0.0023746	2	11	7	5	24	28	23	30	Sctr	secretin receptor [Source:MGI Symbol;Acc:MGI:2441720]
ENSMUSG00000033249	64.81	140.29	-1.1085	0.00016161	0.0023848	46	35	97	64	139	151	136	194	Hsf4	heat shock transcription factor 4 [Source:MGI Symbol;Acc:MGI:1347058]
ENSMUSG00000109718	28.26	6.02	2.2751	0.00016196	0.0023888	13	23	43	27	12	8	2	3	Trim61	tripartite motif-containing 61 [Source:MGI Symbol;Acc:MGI:2387432]
ENSMUSG00000104597	3	15.05	-2.3331	0.00016227	0.0023922	2	2	2	5	10	22	20	16	B230334C09Rik	RIKEN cDNA B230334C09 gene [Source:MGI Symbol;Acc:MGI:2442224]
ENSMUSG00000048616	29.27	64.22	-1.1332	0.00016604	0.0024402	33	22	34	18	66	58	78	81	Nog	noggin [Source:MGI Symbol;Acc:MGI:104327]
ENSMUSG00000040170	611.51	1323.02	-1.1128	0.00016696	0.0024516	285	424	884	699	1056	1700	1761	1407	Fmo2	flavin containing monooxygenase 2 [Source:MGI Symbol;Acc:MGI:1916776]
ENSMUSG00000104263	24.44	7.54	1.6815	0.00016913	0.0024761	24	22	22	21	5	9	5	15	9430062P05Rik	RIKEN cDNA 9430062P05 gene [Source:MGI Symbol;Acc:MGI:2441746]
ENSMUSG00000030069	11.42	1.18	3.333	0.00017072	0.0024969	4	10	18	11	2	1	0	2	Prok2	prokineticin 2 [Source:MGI Symbol;Acc:MGI:1354178]
ENSMUSG00000028789	942.89	455.21	1.0514	0.00017133	0.002504	704	497	1393	922	486	468	459	589	Azin2	antizyme inhibitor 2 [Source:MGI Symbol;Acc:MGI:2442093]
ENSMUSG00000052825	657.7	323.66	1.023	0.00017138	0.002504	823	632	484	428	352	375	378	318	Gm9892	predicted gene 9892 [Source:MGI Symbol;Acc:MGI:3701610]
ENSMUSG00000081957	25.45	5.58	2.2115	0.00017158	0.0025057	25	6	31	32	8	6	4	6	Ak3l2-ps	adenylate kinase 3-like 2, pseudogene [Source:MGI Symbol;Acc:MGI:3574349]
ENSMUSG00000040936	20.36	46.51	-1.1784	0.00017202	0.0025109	13	17	31	15	45	55	53	53	Ulk4	unc-51-like kinase 4 [Source:MGI Symbol;Acc:MGI:1921622]
ENSMUSG00000114772	3.94	19.65	-2.2863	0.0001738	0.0025306	0	4	7	4	20	33	17	17	2210404E10Rik	RIKEN cDNA 2210404E10 gene [Source:MGI Symbol;Acc:MGI:1919555]
ENSMUSG00000052305	5297.03	2314.65	1.1944	0.00017419	0.0025351	3024	4259	3492	8642	1910	2719	3013	2699	Hbb-bs	hemoglobin, beta adult s chain [Source:MGI Symbol;Acc:MGI:5474852]
ENSMUSG00000106735	1.37	16.22	-3.5768	0.00017451	0.0025368	0	4	1	0	4	19	27	25	A330058E17Rik	RIKEN cDNA A330058E17 gene [Source:MGI Symbol;Acc:MGI:2442263]
ENSMUSG00000073405	124.01	54.64	1.1821	0.00017456	0.0025368	71	76	158	157	41	57	67	80	H2-T-ps	histocompatibility 2, T region locus, pseudogene [Source:MGI Symbol;Acc:MGI:2442805]
ENSMUSG00000086320	12.62	1.96	2.6501	0.00017609	0.0025502	13	8	11	14	1	5	1	2	Gm12840	predicted gene 12840 [Source:MGI Symbol;Acc:MGI:3650917]
ENSMUSG00000069515	20.52	54.79	-1.4243	0.00017593	0.0025502	28	18	19	9	54	45	76	67	Lyz1	lysozyme 1 [Source:MGI Symbol;Acc:MGI:96902]
ENSMUSG00000082738	0.25	7.91	-4.5845	0.00017606	0.0025502	0	0	1	0	4	9	13	10	Gm15422	predicted gene 15422 [Source:MGI Symbol;Acc:MGI:3707362]
ENSMUSG00000047161	1.33	11.24	-3.0508	0.00017587	0.0025502	0	2	2	1	10	13	15	12	Chst9	carbohydrate (N-acetylgalactosamine 4-0) sulfotransferase 9 [Source:MGI Symbol;Acc:MGI:1918617]
ENSMUSG00000036718	800.12	273.85	1.5462	0.00017666	0.0025572	1412	443	421	560	224	364	358	279	Micall2	MICAL-like 2 [Source:MGI Symbol;Acc:MGI:2444818]
ENSMUSG00000028351	27.09	5.66	2.2597	0.0001774	0.0025655	42	16	31	9	6	10	5	4	Brinp1	bone morphogenic protein/retinoic acid inducible neural specific 1 [Source:MGI Symbol;Acc:MGI:1928478]
ENSMUSG00000028176	0.27	8.54	-4.6953	0.00017811	0.0025745	0	0	0	1	4	12	6	17	Lrrc7	leucine rich repeat containing 7 [Source:MGI Symbol;Acc:MGI:2676665]
ENSMUSG00000070871	1563.41	619.8	1.335	0.0001792	0.0025877	821	654	2223	2165	568	746	723	717	Ccnyl1	cyclin Y-like 1 [Source:MGI Symbol;Acc:MGI:2138614]
ENSMUSG00000118607	12.22	1.48	2.9822	0.00017935	0.0025885	10	8	13	14	0	4	0	3	Gm7592	predicted gene 7592 [Source:MGI Symbol;Acc:MGI:3644077]
ENSMUSG00000061100	311.82	721.84	-1.2119	0.00017948	0.0025892	390	327	250	156	609	650	833	1124	Retnla	resistin like alpha [Source:MGI Symbol;Acc:MGI:1888504]
ENSMUSG00000027996	30.59	65.92	-1.1154	0.00018167	0.0026194	29	38	26	18	52	72	84	87	Sfrp2	secreted frizzled-related protein 2 [Source:MGI Symbol;Acc:MGI:108078]
ENSMUSG00000059049	50.62	135.91	-1.4185	0.00018331	0.0026406	23	26	95	48	107	181	161	160	Frem1	Fras1 related extracellular matrix protein 1 [Source:MGI Symbol;Acc:MGI:2670972]
ENSMUSG00000053398	832.13	315.54	1.3993	0.00018719	0.0026873	1010	1058	537	377	385	271	395	323	Phgdh	3-phosphoglycerate dehydrogenase [Source:MGI Symbol;Acc:MGI:1355330]
ENSMUSG00000109685	13.29	1.19	3.5284	0.00018883	0.0027069	18	16	3	10	2	0	2	1	Gvin-ps1	GTPase, very large interferon inducible, pseudogene 1 [Source:MGI Symbol;Acc:MGI:1924950]
ENSMUSG00000021903	1747.2	4425.64	-1.3408	0.00019187	0.0027465	1767	982	2870	873	2785	5656	5067	6503	Galnt15	polypeptide N-acetylgalactosaminyltransferase 15 [Source:MGI Symbol;Acc:MGI:1926004]
ENSMUSG00000036334	127.59	281.64	-1.1442	0.00019276	0.0027553	149	93	148	76	166	408	401	303	Igsf10	immunoglobulin superfamily, member 10 [Source:MGI Symbol;Acc:MGI:1923481]
ENSMUSG00000110114	11.02	1.28	3.0529	0.00019314	0.0027593	9	6	16	10	0	1	3	2	Gm45471	predicted gene 45471 [Source:MGI Symbol;Acc:MGI:5791307]
ENSMUSG00000022886	2416.19	1010.22	1.258	0.00019326	0.0027598	1252	1930	1824	3884	801	907	1280	1527	Prl2a1	prolactin family 2, subfamily a, member 1 [Source:MGI Symbol;Acc:MGI:1861446]
ENSMUSG00000044072	38.13	87.78	-1.1984	0.0001944	0.0027734	27	17	51	47	71	122	109	91	Eml6	echinoderm microtubule associated protein like 6 [Source:MGI Symbol;Acc:MGI:2442895]
ENSMUSG00000026380	1133.19	2917.68	-1.3647	0.00019633	0.0027996	930	1440	775	964	1153	5341	3550	3371	Tfcp2l1	transcription factor CP2-like 1 [Source:MGI Symbol;Acc:MGI:2444691]
ENSMUSG00000036295	10.16	34.43	-1.7526	0.0001989	0.0028301	8	3	16	11	23	29	50	53	Lrrn3	leucine rich repeat protein 3, neuronal [Source:MGI Symbol;Acc:MGI:106036]
ENSMUSG00000039542	753.93	1542.56	-1.0331	0.00020176	0.0028658	460	876	625	801	935	2329	2167	1564	Ncam1	neural cell adhesion molecule 1 [Source:MGI Symbol;Acc:MGI:97281]
ENSMUSG00000046295	19.97	44.25	-1.1486	0.00020228	0.0028691	14	21	16	22	42	42	57	55	Ankle1	ankyrin repeat and LEM domain containing 1 [Source:MGI Symbol;Acc:MGI:1918775]
ENSMUSG00000044309	17.59	4.54	1.9582	0.00020302	0.0028783	15	19	14	16	5	8	2	5	Apol7c	apolipoprotein L 7c [Source:MGI Symbol;Acc:MGI:1920912]
ENSMUSG00000087033	1.63	12.24	-2.9092	0.00020459	0.0028964	2	0	2	2	9	16	10	20	Gm14155	predicted gene 14155 [Source:MGI Symbol;Acc:MGI:3651338]
ENSMUSG00000048534	46.18	18.06	1.3605	0.00020456	0.0028964	59	27	49	33	21	20	18	20	Jaml	junction adhesion molecule like [Source:MGI Symbol;Acc:MGI:2685484]
ENSMUSG00000023484	9.26	29.19	-1.6588	0.00020619	0.0029134	6	13	10	5	21	25	41	44	Prph	peripherin [Source:MGI Symbol;Acc:MGI:97774]
ENSMUSG00000030157	2790.21	1162.96	1.2623	0.00020632	0.0029139	2926	3296	1733	2093	664	1293	1162	2152	Clec2d	C-type lectin domain family 2, member d [Source:MGI Symbol;Acc:MGI:2135589]
ENSMUSG00000042379	32.9	107.69	-1.7021	0.00020684	0.0029199	20	27	51	25	200	74	95	81	Esm1	endothelial cell-specific molecule 1 [Source:MGI Symbol;Acc:MGI:1918940]
ENSMUSG00000106036	1.59	14.9	-3.1892	0.00020868	0.0029444	0	1	2	3	25	10	20	8	Gm43608	predicted gene 43608 [Source:MGI Symbol;Acc:MGI:5663745]
ENSMUSG00000061808	41.57	169.29	-2.0262	0.00020905	0.0029481	26	45	42	40	68	69	168	467	Ttr	transthyretin [Source:MGI Symbol;Acc:MGI:98865]
ENSMUSG00000026826	148.69	364.36	-1.2923	0.0002106	0.0029658	129	91	194	136	329	373	696	222	Nr4a2	nuclear receptor subfamily 4, group A, member 2 [Source:MGI Symbol;Acc:MGI:1352456]
ENSMUSG00000020150	26.88	60.41	-1.1782	0.00021199	0.0029811	30	32	21	14	50	79	72	69	Gamt	guanidinoacetate methyltransferase [Source:MGI Symbol;Acc:MGI:1098221]
ENSMUSG00000031722	3610.82	1352.98	1.4165	0.00021297	0.0029934	1484	4312	4965	2705	1827	832	1614	1563	Hp	haptoglobin [Source:MGI Symbol;Acc:MGI:96211]
ENSMUSG00000083836	57.15	26.39	1.1292	0.00021494	0.0030198	37	42	70	63	32	24	29	30	Ldha-ps2	lactate dehydrogenase A, pseudogene 2 [Source:MGI Symbol;Acc:MGI:96761]
ENSMUSG00000027488	572.35	1571.12	-1.4562	0.00021572	0.0030278	361	228	1036	535	1875	1408	1363	2205	Snta1	syntrophin, acidic 1 [Source:MGI Symbol;Acc:MGI:101772]
ENSMUSG00000031765	23939.6	8260.14	1.5352	0.00021909	0.0030693	18240	12271	33887	24720	15009	5770	6111	7711	Mt1	metallothionein 1 [Source:MGI Symbol;Acc:MGI:97171]
ENSMUSG00000043122	2.79	22.64	-3.0393	0.00022392	0.0031295	3	3	1	3	7	20	11	66	A530016L24Rik	RIKEN cDNA A530016L24 gene [Source:MGI Symbol;Acc:MGI:2443020]
ENSMUSG00000028246	104.37	213.35	-1.0325	0.00022525	0.0031466	81	69	115	120	119	323	249	279	Faxc	failed axon connections homolog [Source:MGI Symbol;Acc:MGI:1923382]
ENSMUSG00000117466	3.71	18.16	-2.2765	0.00022799	0.003182	1	3	6	4	8	20	30	25	Gm50039	predicted gene, 50039 [Source:MGI Symbol;Acc:MGI:6275346]
ENSMUSG00000038543	23.58	48	-1.0266	0.00023038	0.0032108	24	20	23	19	48	50	55	59	BC028528	cDNA sequence BC028528 [Source:MGI Symbol;Acc:MGI:2385885]
ENSMUSG00000074259	15.76	39.65	-1.3256	0.00023164	0.0032254	7	18	13	20	40	39	52	44	Gramd2	GRAM domain containing 2 [Source:MGI Symbol;Acc:MGI:3528937]
ENSMUSG00000037579	5.75	22.53	-1.9785	0.000232	0.0032288	2	11	4	4	14	31	28	29	Kcnh3	potassium voltage-gated channel, subfamily H (eag-related), member 3 [Source:MGI Symbol;Acc:MGI:1341723]
ENSMUSG00000024409	17.74	0.7	4.6877	0.00023347	0.0032477	46	6	3	6	1	0	0	2	Psors1c2	psoriasis susceptibility 1 candidate 2 (human) [Source:MGI Symbol;Acc:MGI:1930025]
ENSMUSG00000112023	1662.09	712.25	1.2234	0.00023946	0.0033248	1462	1085	1874	1697	1163	647	700	513	Lilr4b	leukocyte immunoglobulin-like receptor, subfamily B, member 4B [Source:MGI Symbol;Acc:MGI:102702]
ENSMUSG00000069171	16.21	44.02	-1.438	0.00024224	0.0033587	17	8	24	11	35	55	38	69	Nr2f1	nuclear receptor subfamily 2, group F, member 1 [Source:MGI Symbol;Acc:MGI:1352451]
ENSMUSG00000033508	98.35	26.27	1.8979	0.00024348	0.0033695	51	197	56	52	13	43	36	28	Asprv1	aspartic peptidase, retroviral-like 1 [Source:MGI Symbol;Acc:MGI:1915105]
ENSMUSG00000091754	52.61	16.46	1.6636	0.00024597	0.0034025	49	53	28	60	8	20	12	35	Gm3636	predicted gene 3636 [Source:MGI Symbol;Acc:MGI:3781812]
ENSMUSG00000110497	0.79	21.9	-4.7669	0.00024719	0.0034176	0	0	1	2	1	56	5	41	9230110F11Rik	RIKEN cDNA 9230110F11 gene [Source:MGI Symbol;Acc:MGI:2444007]
ENSMUSG00000015852	302.9	673.24	-1.1512	0.00024833	0.00343	269	137	412	305	840	776	753	562	Fcrls	Fc receptor-like S, scavenger receptor [Source:MGI Symbol;Acc:MGI:1933397]
ENSMUSG00000033268	80.6	318.4	-1.9804	0.00025229	0.0034736	66	9	140	88	285	427	233	472	Duox1	dual oxidase 1 [Source:MGI Symbol;Acc:MGI:2139422]
ENSMUSG00000022861	52.11	195.49	-1.9036	0.00025887	0.0035576	9	32	64	91	278	233	178	153	Dgkg	diacylglycerol kinase, gamma [Source:MGI Symbol;Acc:MGI:105060]
ENSMUSG00000084910	28.12	57.85	-1.0457	0.00026025	0.0035729	22	33	29	19	43	80	73	64	C630043F03Rik	RIKEN cDNA C630043F03 gene [Source:MGI Symbol;Acc:MGI:1915535]
ENSMUSG00000038020	148.25	512.56	-1.789	0.00026035	0.0035729	20	221	165	146	419	698	597	579	Rapgefl1	Rap guanine nucleotide exchange factor (GEF)-like 1 [Source:MGI Symbol;Acc:MGI:3611446]
ENSMUSG00000089929	40.51	16.83	1.2919	0.00026304	0.0036048	33	35	45	36	25	12	16	19	Bcl2a1b	B cell leukemia/lymphoma 2 related protein A1b [Source:MGI Symbol;Acc:MGI:1278326]
ENSMUSG00000079243	47.97	7.5	2.6832	0.00026553	0.0036356	8	10	80	85	8	7	13	5	Xirp1	xin actin-binding repeat containing 1 [Source:MGI Symbol;Acc:MGI:1333878]
ENSMUSG00000086968	32.85	77.7	-1.2398	0.00026978	0.0036904	14	35	38	35	53	131	89	78	4933431E20Rik	RIKEN cDNA 4933431E20 gene [Source:MGI Symbol;Acc:MGI:3584041]
ENSMUSG00000015970	1313.79	4192.1	-1.6739	0.00027002	0.0036918	319	1991	1156	1384	2047	6891	5642	4574	Chdh	choline dehydrogenase [Source:MGI Symbol;Acc:MGI:1860776]
ENSMUSG00000071324	5.52	23.09	-2.0799	0.00027164	0.0037107	4	9	4	3	12	27	21	45	Armc2	armadillo repeat containing 2 [Source:MGI Symbol;Acc:MGI:1916449]
ENSMUSG00000025776	36.13	90.98	-1.3264	0.00027185	0.0037119	24	17	64	31	63	118	126	103	Crispld1	cysteine-rich secretory protein LCCL domain containing 1 [Source:MGI Symbol;Acc:MGI:1934666]
ENSMUSG00000080994	17.7	4.92	1.8491	0.00027373	0.0037301	11	15	26	14	4	6	7	5	Gm13464	predicted gene 13464 [Source:MGI Symbol;Acc:MGI:3649845]
ENSMUSG00000050549	187.27	91.31	1.0307	0.00027365	0.0037301	222	181	136	136	58	125	116	114	Fam241a	family with sequence similarity 241, member A [Source:MGI Symbol;Acc:MGI:1917867]
ENSMUSG00000031962	14.79	1.12	3.7143	0.00027503	0.0037432	27	9	16	1	1	2	1	1	Cdh15	cadherin 15 [Source:MGI Symbol;Acc:MGI:106672]
ENSMUSG00000110386	101.16	42.93	1.2304	0.00027547	0.0037457	106	114	57	87	31	55	38	69	Gm42031	predicted gene, 42031 [Source:MGI Symbol;Acc:MGI:5624916]
ENSMUSG00000056481	870.5	1982.17	-1.1876	0.00028113	0.0038157	913	1179	606	437	1418	2284	2679	2532	Cd248	CD248 antigen, endosialin [Source:MGI Symbol;Acc:MGI:1917695]
ENSMUSG00000024669	11.21	30.41	-1.4496	0.00028429	0.0038551	11	8	11	11	18	46	43	31	Cd5	CD5 antigen [Source:MGI Symbol;Acc:MGI:88340]
ENSMUSG00000062545	4.54	17.26	-1.9013	0.00028671	0.0038843	2	3	6	6	18	17	21	20	Tlr12	toll-like receptor 12 [Source:MGI Symbol;Acc:MGI:3045221]
ENSMUSG00000101581	229.25	66.46	1.789	0.000288	0.003895	103	58	351	353	79	63	66	82	C430002N11Rik	RIKEN cDNA C430002N11 gene [Source:MGI Symbol;Acc:MGI:2442576]
ENSMUSG00000118133	55.81	24.31	1.2183	0.00029237	0.0039429	44	55	60	46	37	27	22	18	Gm6978	predicted gene 6978 [Source:MGI Symbol;Acc:MGI:3647254]
ENSMUSG00000034387	4.5	20.4	-2.1928	0.00029429	0.0039634	7	3	2	4	32	21	20	14	Ssu2	ssu-2 homolog (C. elegans) [Source:MGI Symbol;Acc:MGI:2443733]
ENSMUSG00000074677	39	12.9	1.6218	0.00029901	0.0040115	24	29	62	31	20	11	8	16	Sirpb1c	signal-regulatory protein beta 1C [Source:MGI Symbol;Acc:MGI:3807521]
ENSMUSG00000043719	16.14	38.71	-1.2705	0.00029886	0.0040115	13	18	15	13	24	44	48	59	Col6a6	collagen, type VI, alpha 6 [Source:MGI Symbol;Acc:MGI:2444259]
ENSMUSG00000072621	131.8	51.22	1.3661	0.00029897	0.0040115	87	51	203	153	50	73	50	54	Slfn10-ps	schlafen 10, pseudogene [Source:MGI Symbol;Acc:MGI:3512288]
ENSMUSG00000031789	11.61	30.94	-1.4313	0.00029922	0.0040115	12	13	9	8	20	49	36	35	Cngb1	cyclic nucleotide gated channel beta 1 [Source:MGI Symbol;Acc:MGI:2664102]
ENSMUSG00000092618	9.17	0.42	4.3495	0.00029959	0.0040147	8	3	12	11	0	1	1	0	Btnl6	butyrophilin-like 6 [Source:MGI Symbol;Acc:MGI:1932038]
ENSMUSG00000068740	116.67	368.11	-1.6594	0.0003001	0.0040197	91	181	76	74	105	614	485	498	Celsr2	cadherin, EGF LAG seven-pass G-type receptor 2 [Source:MGI Symbol;Acc:MGI:1858235]
ENSMUSG00000042351	12.07	30.97	-1.3655	0.00030051	0.0040234	15	9	14	6	27	37	38	36	Grap2	GRB2-related adaptor protein 2 [Source:MGI Symbol;Acc:MGI:1333842]
ENSMUSG00000021469	33.28	9.96	1.7378	0.00030259	0.0040494	49	32	24	14	10	12	11	11	Msx2	msh homeobox 2 [Source:MGI Symbol;Acc:MGI:97169]
ENSMUSG00000037447	1215.23	599.3	1.021	0.00030371	0.0040625	959	1169	1110	1210	878	547	698	448	Arid5a	AT rich interactive domain 5A (MRF1-like) [Source:MGI Symbol;Acc:MGI:2443039]
ENSMUSG00000091472	12.36	1.97	2.6277	0.00030502	0.0040783	7	7	15	17	1	4	1	3	Gm3739	predicted gene 3739 [Source:MGI Symbol;Acc:MGI:3781914]
ENSMUSG00000036095	3.05	15.26	-2.3444	0.00030789	0.0041147	3	4	2	2	9	12	26	22	Dgkb	diacylglycerol kinase, beta [Source:MGI Symbol;Acc:MGI:2442474]
ENSMUSG00000075289	33.6	70.26	-1.0647	0.00031401	0.0041833	29	27	43	25	49	71	86	110	Carns1	carnosine synthase 1 [Source:MGI Symbol;Acc:MGI:2147595]
ENSMUSG00000050423	9.07	0.43	4.3356	0.00031876	0.004239	5	6	14	9	0	0	2	0	Ppp1r3g	protein phosphatase 1, regulatory subunit 3G [Source:MGI Symbol;Acc:MGI:1923737]
ENSMUSG00000104213	2.98	13.71	-2.1956	0.00031943	0.004246	2	2	3	4	12	13	17	19	Ighd	immunoglobulin heavy constant delta [Source:MGI Symbol;Acc:MGI:96447]
ENSMUSG00000021732	1.09	14.63	-3.7472	0.00032319	0.0042861	1	0	1	2	12	3	14	36	Fgf10	fibroblast growth factor 10 [Source:MGI Symbol;Acc:MGI:1099809]
ENSMUSG00000038569	16.96	39.05	-1.2177	0.0003236	0.0042862	20	15	10	16	34	49	41	50	Rad9b	RAD9 checkpoint clamp component B [Source:MGI Symbol;Acc:MGI:2385231]
ENSMUSG00000048234	1961.77	968.22	1.0185	0.00032599	0.0043138	2630	1141	1805	1525	848	1226	1318	923	Rnf149	ring finger protein 149 [Source:MGI Symbol;Acc:MGI:2677438]
ENSMUSG00000073420	11.03	0.85	3.6414	0.00032776	0.0043353	12	3	18	8	0	2	2	0	Btnl5-ps	butyrophilin-like 5, pseudogene [Source:MGI Symbol;Acc:MGI:1932037]
ENSMUSG00000116935	14.24	1.55	3.1915	0.00033468	0.004417	9	6	29	10	1	1	5	0	Gpr31a	G protein-coupled receptor 31, D17Leh66a region [Source:MGI Symbol;Acc:MGI:1354370]
ENSMUSG00000074634	120.4	275.44	-1.1951	0.00033491	0.004418	120	88	73	155	268	283	208	459	Tmem267	transmembrane protein 267 [Source:MGI Symbol;Acc:MGI:3648543]
ENSMUSG00000113581	121.13	277.11	-1.1942	0.00033596	0.0044299	61	169	135	82	163	390	342	362	Dio3os	deiodinase, iodothyronine type III, opposite strand [Source:MGI Symbol;Acc:MGI:2664395]
ENSMUSG00000074736	16.02	45.62	-1.5248	0.00033947	0.0044722	20	20	6	11	40	43	71	49	Syndig1	synapse differentiation inducing 1 [Source:MGI Symbol;Acc:MGI:3702158]
ENSMUSG00000041565	36.51	89.11	-1.2762	0.00034056	0.0044846	21	25	59	32	116	73	110	87	L3mbtl4	L3MBTL4 histone methyl-lysine binding protein [Source:MGI Symbol;Acc:MGI:2444889]
ENSMUSG00000053825	11.9	38.99	-1.7122	0.00034229	0.0045033	7	13	14	10	21	33	85	38	Ppfia2	protein tyrosine phosphatase, receptor type, f polypeptide (PTPRF), interacting protein (liprin), alpha 2 [Source:MGI Symbol;Acc:MGI:2443834]
ENSMUSG00000040688	1858.58	858.58	1.1141	0.00034325	0.004514	2741	1354	1354	1213	921	941	1010	905	Tbl3	transducin (beta)-like 3 [Source:MGI Symbol;Acc:MGI:2384863]
ENSMUSG00000005580	79.86	193	-1.269	0.00034357	0.0045161	41	38	132	90	168	277	222	194	Adcy9	adenylate cyclase 9 [Source:MGI Symbol;Acc:MGI:108450]
ENSMUSG00000038816	774.92	1635.05	-1.0766	0.00034543	0.0045366	468	505	1351	591	1485	1946	1668	2168	Ctnnal1	catenin (cadherin associated protein), alpha-like 1 [Source:MGI Symbol;Acc:MGI:1859649]
ENSMUSG00000035085	25.96	9.62	1.4216	0.00034622	0.0045449	25	25	17	27	8	13	11	11	1700020L24Rik	RIKEN cDNA 1700020L24 gene [Source:MGI Symbol;Acc:MGI:1913580]
ENSMUSG00000008658	2.67	15.08	-2.478	0.00034662	0.0045481	0	3	3	4	14	19	25	9	Rbfox1	RNA binding protein, fox-1 homolog (C. elegans) 1 [Source:MGI Symbol;Acc:MGI:1926224]
ENSMUSG00000042306	76.25	21.63	1.8244	0.00034756	0.0045565	59	137	36	42	31	23	13	26	S100a14	S100 calcium binding protein A14 [Source:MGI Symbol;Acc:MGI:1913416]
ENSMUSG00000018569	4794.56	1308.04	1.8739	0.00034885	0.0045713	9611	3842	1451	1840	1212	1654	1429	1515	Cldn7	claudin 7 [Source:MGI Symbol;Acc:MGI:1859285]
ENSMUSG00000005057	160.22	62.37	1.3667	0.00034977	0.0045814	110	81	196	208	85	51	44	89	Sh2b2	SH2B adaptor protein 2 [Source:MGI Symbol;Acc:MGI:1345171]
ENSMUSG00000044522	32.06	109.38	-1.7681	0.00035253	0.0046135	4	53	33	29	86	135	154	115	A730020M07Rik	RIKEN cDNA A730020M07 gene [Source:MGI Symbol;Acc:MGI:2442643]
ENSMUSG00000012350	3298.17	1574.96	1.0661	0.00035637	0.0046575	4644	2132	2439	2642	1179	2229	1687	1981	Ehf	ets homologous factor [Source:MGI Symbol;Acc:MGI:1270840]
ENSMUSG00000031377	15.95	46.15	-1.5398	0.00035823	0.0046797	17	20	17	4	31	49	70	58	Bmx	BMX non-receptor tyrosine kinase [Source:MGI Symbol;Acc:MGI:1101778]
ENSMUSG00000026473	10939.5	27890.1	-1.3502	0.00035929	0.0046915	9329	3802	18212	9583	27765	29984	23495	41963	Glul	glutamate-ammonia ligase (glutamine synthetase) [Source:MGI Symbol;Acc:MGI:95739]
ENSMUSG00000043243	46.59	20.5	1.1785	0.00036402	0.0047428	34	52	48	37	15	21	20	36	Niban3	niban apoptosis regulator 3 [Source:MGI Symbol;Acc:MGI:3686743]
ENSMUSG00000027901	628.47	200.35	1.6495	0.00036422	0.0047433	1088	182	473	505	228	279	167	205	Dennd2d	DENN/MADD domain containing 2D [Source:MGI Symbol;Acc:MGI:2181193]
ENSMUSG00000007682	2167.71	851.82	1.3472	0.00036579	0.0047596	2875	2531	1283	1053	558	1157	1303	831	Dio2	deiodinase, iodothyronine, type II [Source:MGI Symbol;Acc:MGI:1338833]
ENSMUSG00000041754	10.48	0.82	3.883	0.00036895	0.0047966	10	14	9	5	3	0	0	0	Trem3	triggering receptor expressed on myeloid cells 3 [Source:MGI Symbol;Acc:MGI:1930003]
ENSMUSG00000085501	19.74	4.38	2.1465	0.00037197	0.0048337	29	12	16	14	2	5	10	3	Gm11772	predicted gene 11772 [Source:MGI Symbol;Acc:MGI:3649468]
ENSMUSG00000029675	4320.08	8994.92	-1.0582	0.00037237	0.0048346	5237	4264	2956	3084	5731	10461	14591	9865	Eln	elastin [Source:MGI Symbol;Acc:MGI:95317]
ENSMUSG00000039873	49.05	113.28	-1.2127	0.00037343	0.0048442	65	25	48	40	71	133	132	176	Neurl2	neuralized E3 ubiquitin protein ligase 2 [Source:MGI Symbol;Acc:MGI:3043305]
ENSMUSG00000116887	1.3	10.91	-3.0201	0.00037413	0.004851	0	2	3	0	8	12	14	15	Gm6029	predicted gene 6029 [Source:MGI Symbol;Acc:MGI:3643236]
ENSMUSG00000085790	14.86	2.66	2.4766	0.00037533	0.0048634	10	9	28	9	2	5	4	1	Gm12729	predicted gene 12729 [Source:MGI Symbol;Acc:MGI:3649488]
ENSMUSG00000117269	11.14	1.45	3.0062	0.00037593	0.004868	16	7	8	9	3	2	1	0	Gm9706	predicted gene 9706 [Source:MGI Symbol;Acc:MGI:3780113]
ENSMUSG00000116336	52.96	227.59	-2.1061	0.0003803	0.0049182	48	107	23	11	132	342	403	157	Gm49425	predicted gene, 49425 [Source:MGI Symbol;Acc:MGI:6155060]
ENSMUSG00000108691	0.52	9.35	-4.1065	0.00038179	0.0049288	0	0	1	1	7	13	9	13	Gm45226	predicted gene 45226 [Source:MGI Symbol;Acc:MGI:5753802]
ENSMUSG00000021348	769.59	243.9	1.6583	0.00038175	0.0049288	198	402	948	1343	256	213	260	344	Prl7d1	prolactin family 7, subfamily d, member 1 [Source:MGI Symbol;Acc:MGI:97619]
ENSMUSG00000027902	56.82	19.93	1.505	0.00038502	0.0049597	91	37	40	35	17	28	25	19	Chil6	chitinase-like 6 [Source:MGI Symbol;Acc:MGI:2682303]
ENSMUSG00000085139	4.69	19.65	-2.0779	0.00038621	0.0049729	4	8	4	1	16	28	30	14	A730046J19Rik	RIKEN cDNA A730046J19 gene [Source:MGI Symbol;Acc:MGI:2442684]
ENSMUSG00000087017	12.69	2.61	2.2415	0.0003871	0.0049822	13	10	9	14	1	4	4	3	4930417H01Rik	RIKEN cDNA 4930417H01 gene [Source:MGI Symbol;Acc:MGI:3041209]
ENSMUSG00000109244	53.78	26.34	1.0365	0.00038804	0.0049921	51	32	64	51	28	31	30	27	Gm44751	predicted gene 44751 [Source:MGI Symbol;Acc:MGI:5753327]
ENSMUSG00000027335	5.03	19.33	-1.9668	0.00038956	0.0050073	5	7	2	4	13	16	29	29	Adra1d	adrenergic receptor, alpha 1d [Source:MGI Symbol;Acc:MGI:106673]
ENSMUSG00000102099	6.79	0	5.3431	0.0003901	0.0050121	15	1	5	3	0	0	0	0	1700011B04Rik	RIKEN cDNA 1700011B04 gene [Source:MGI Symbol;Acc:MGI:1922894]
ENSMUSG00000118361	14.84	1.76	3.0622	0.00039395	0.0050527	5	4	21	26	1	2	4	1	Gm50237	predicted gene, 50237 [Source:MGI Symbol;Acc:MGI:6303043]
ENSMUSG00000020524	81.94	176.31	-1.1092	0.00039601	0.0050748	63	103	61	71	92	205	250	255	Gria1	glutamate receptor, ionotropic, AMPA1 (alpha 1) [Source:MGI Symbol;Acc:MGI:95808]
ENSMUSG00000082079	8.66	0.64	3.6955	0.0003964	0.0050776	5	10	10	7	0	0	2	1	Dnmt3c	DNA methyltransferase 3C [Source:MGI Symbol;Acc:MGI:3649996]
ENSMUSG00000115025	20	3.84	2.3889	0.0004022	0.0051432	14	5	31	25	4	8	2	3	Gm4240	predicted gene 4240 [Source:MGI Symbol;Acc:MGI:3782417]
ENSMUSG00000022206	43.24	105.2	-1.276	0.00040229	0.0051432	34	20	62	45	131	82	99	145	Npr3	natriuretic peptide receptor 3 [Source:MGI Symbol;Acc:MGI:97373]
ENSMUSG00000024472	1333.73	631.05	1.0798	0.00040437	0.0051617	1032	563	1694	1662	572	791	642	801	Dcp2	decapping mRNA 2 [Source:MGI Symbol;Acc:MGI:1917890]
ENSMUSG00000107603	4.67	18.91	-2.0309	0.00041445	0.0052768	2	6	2	7	10	24	23	29	Gm43921	predicted gene, 43921 [Source:MGI Symbol;Acc:MGI:5690313]
ENSMUSG00000031445	11.64	29.54	-1.3439	0.00041694	0.0053017	10	6	14	13	21	39	39	34	Proz	protein Z, vitamin K-dependent plasma glycoprotein [Source:MGI Symbol;Acc:MGI:1860488]
ENSMUSG00000038725	161.64	399.02	-1.3061	0.00042172	0.0053532	237	157	105	78	264	592	504	443	Pkhd1l1	polycystic kidney and hepatic disease 1-like 1 [Source:MGI Symbol;Acc:MGI:2183153]
ENSMUSG00000071551	38.87	158.85	-2.036	0.00042323	0.0053655	42	70	13	13	53	241	240	198	Akr1c19	aldo-keto reductase family 1, member C19 [Source:MGI Symbol;Acc:MGI:2653678]
ENSMUSG00000097418	133.53	51.85	1.3722	0.00042592	0.0053949	94	55	185	164	74	51	52	46	Mir155hg	Mir155 host gene (non-protein coding) [Source:MGI Symbol;Acc:MGI:5477161]
ENSMUSG00000039963	35.85	95.16	-1.412	0.00042741	0.0054115	18	53	26	34	45	152	110	128	Ccdc40	coiled-coil domain containing 40 [Source:MGI Symbol;Acc:MGI:2443893]
ENSMUSG00000070509	1426.26	624.41	1.1912	0.00043049	0.0054482	1642	1798	683	977	472	718	863	748	Rgma	repulsive guidance molecule family member A [Source:MGI Symbol;Acc:MGI:2679262]
ENSMUSG00000079323	14.13	2.89	2.2793	0.00043435	0.0054901	13	6	15	18	2	2	6	3	Gm20661	predicted gene 20661 [Source:MGI Symbol;Acc:MGI:5313108]
ENSMUSG00000050503	170.06	430.89	-1.343	0.00043604	0.0055019	163	267	76	103	310	542	546	540	Fbxl22	F-box and leucine-rich repeat protein 22 [Source:MGI Symbol;Acc:MGI:1921415]
ENSMUSG00000030693	25.22	6.97	1.877	0.00043716	0.0055138	19	10	24	40	10	8	6	6	Klk10	kallikrein related-peptidase 10 [Source:MGI Symbol;Acc:MGI:1916790]
ENSMUSG00000022026	315.91	18.44	4.0972	0.00043826	0.0055253	849	169	28	33	11	43	23	7	Olfm4	olfactomedin 4 [Source:MGI Symbol;Acc:MGI:2685142]
ENSMUSG00000071005	10.26	0.64	3.9379	0.000443	0.005578	11	14	8	4	0	0	3	0	Ccl19	chemokine (C-C motif) ligand 19 [Source:MGI Symbol;Acc:MGI:1346316]
ENSMUSG00000028001	930.08	138.6	2.7474	0.00045012	0.005658	156	464	1481	1431	228	62	87	209	Fga	fibrinogen alpha chain [Source:MGI Symbol;Acc:MGI:1316726]
ENSMUSG00000051652	26.16	59.36	-1.1814	0.00045339	0.0056967	12	33	20	31	53	63	85	63	Lrrc3	leucine rich repeat containing 3 [Source:MGI Symbol;Acc:MGI:2447899]
ENSMUSG00000059657	9.87	0.54	4.4238	0.00046304	0.0058105	14	12	4	5	2	0	0	0	Stfa2l1	stefin A2 like 1 [Source:MGI Symbol;Acc:MGI:3524944]
ENSMUSG00000097107	13.02	47.85	-1.8784	0.00046583	0.005838	2	21	10	15	25	75	43	75	Platr6	pluripotency associated transcript 6 [Source:MGI Symbol;Acc:MGI:3779636]
ENSMUSG00000029861	4.51	18.06	-1.9816	0.00046754	0.0058545	3	4	9	1	14	25	24	18	Fam131b	family with sequence similarity 131, member B [Source:MGI Symbol;Acc:MGI:1923406]
ENSMUSG00000004328	133.99	366.32	-1.4493	0.00047087	0.0058938	50	89	233	135	205	430	369	658	Hif3a	hypoxia inducible factor 3, alpha subunit [Source:MGI Symbol;Acc:MGI:1859778]
ENSMUSG00000021391	10.51	28.94	-1.4751	0.00047579	0.0059503	10	10	6	12	21	29	49	31	Cenpp	centromere protein P [Source:MGI Symbol;Acc:MGI:1913586]
ENSMUSG00000056174	52.46	141.52	-1.4367	0.00047987	0.0059988	71	65	30	21	126	169	213	122	Col8a2	collagen, type VIII, alpha 2 [Source:MGI Symbol;Acc:MGI:88464]
ENSMUSG00000050141	10.53	1.75	2.5635	0.00048231	0.0060268	6	10	12	11	1	4	1	2	Fam205c	family with sequence similarity 205, member C [Source:MGI Symbol;Acc:MGI:2679716]
ENSMUSG00000024063	1700.6	797.06	1.0928	0.00049001	0.0061049	1994	1843	892	1366	534	995	1172	895	Lbh	limb-bud and heart [Source:MGI Symbol;Acc:MGI:1925139]
ENSMUSG00000046203	813.31	79.53	3.3535	0.00049164	0.0061226	1065	1450	77	261	41	112	31	178	Sprr2g	small proline-rich protein 2G [Source:MGI Symbol;Acc:MGI:1330348]
ENSMUSG00000057606	19	6.12	1.6431	0.00049653	0.0061753	14	20	22	14	6	4	8	9	Colq	collagen-like tail subunit (single strand of homotrimer) of asymmetric acetylcholinesterase [Source:MGI Symbol;Acc:MGI:1338761]
ENSMUSG00000087700	64.81	13.09	2.3107	0.0004963	0.0061753	17	16	102	111	13	19	21	5	Gm15283	predicted gene 15283 [Source:MGI Symbol;Acc:MGI:3705161]
ENSMUSG00000023064	37.52	79.9	-1.0976	0.00050326	0.0062542	44	33	34	25	57	83	85	134	Sncg	synuclein, gamma [Source:MGI Symbol;Acc:MGI:1298397]
ENSMUSG00000026828	1.91	12	-2.6631	0.00050785	0.0062961	2	1	2	2	5	17	21	12	Galnt5	polypeptide N-acetylgalactosaminyltransferase 5 [Source:MGI Symbol;Acc:MGI:2179403]
ENSMUSG00000037892	31.57	88.91	-1.4985	0.00050769	0.0062961	29	42	32	12	40	136	140	91	Pcdh18	protocadherin 18 [Source:MGI Symbol;Acc:MGI:1920423]
ENSMUSG00000086835	10.79	1.4	2.9859	0.00051778	0.0064077	11	7	17	5	2	1	0	3	Gm11775	predicted gene 11775 [Source:MGI Symbol;Acc:MGI:3651517]
ENSMUSG00000042417	15.32	3.84	2.0056	0.00051851	0.0064123	11	9	21	16	4	7	4	2	Ccno	cyclin O [Source:MGI Symbol;Acc:MGI:2145534]
ENSMUSG00000029777	5102.27	2550.33	1.0005	0.00051923	0.0064176	5888	5861	3751	2877	2857	2808	2964	2558	Gars	glycyl-tRNA synthetase [Source:MGI Symbol;Acc:MGI:2449057]
ENSMUSG00000028893	724	361.86	1.0001	0.00052777	0.0064988	804	809	560	441	325	433	304	547	Sesn2	sestrin 2 [Source:MGI Symbol;Acc:MGI:2651874]
ENSMUSG00000016756	38.61	115.05	-1.5791	0.00052839	0.0065038	33	70	25	11	92	147	134	142	Cmah	cytidine monophospho-N-acetylneuraminic acid hydroxylase [Source:MGI Symbol;Acc:MGI:103227]
ENSMUSG00000104045	11.23	1.49	2.8592	0.0005343	0.0065655	7	9	6	19	0	3	2	2	Gm37565	predicted gene, 37565 [Source:MGI Symbol;Acc:MGI:5610793]
ENSMUSG00000001168	20.04	2.5	3.0078	0.00054068	0.0066219	19	3	11	40	3	6	1	1	Oas1h	2'-5' oligoadenylate synthetase 1H [Source:MGI Symbol;Acc:MGI:2180853]
ENSMUSG00000029563	4.51	17.08	-1.9555	0.00054482	0.0066643	6	4	1	5	12	26	21	18	Foxp2	forkhead box P2 [Source:MGI Symbol;Acc:MGI:2148705]
ENSMUSG00000082976	5.26	0	4.9906	0.00054473	0.0066643	2	5	11	2	0	0	0	0	Gm15056	predicted gene 15056 [Source:MGI Symbol;Acc:MGI:3705859]
ENSMUSG00000009670	2.5	16.69	-2.7566	0.0005483	0.0067014	5	0	3	1	12	21	8	34	Tex11	testis expressed gene 11 [Source:MGI Symbol;Acc:MGI:1933237]
ENSMUSG00000089726	232.1	94.09	1.2991	0.00054886	0.0067055	328	236	135	129	59	138	124	105	Mir17hg	Mir17 host gene (non-protein coding) [Source:MGI Symbol;Acc:MGI:1923207]
ENSMUSG00000062310	16.76	4.54	1.8893	0.00054919	0.0067067	13	21	13	14	5	8	5	2	Glrp1	glutamine repeat protein 1 [Source:MGI Symbol;Acc:MGI:108038]
ENSMUSG00000027562	7124.44	3008.47	1.2438	0.00055015	0.0067157	10851	3647	4474	6525	3499	3105	3648	2906	Car2	carbonic anhydrase 2 [Source:MGI Symbol;Acc:MGI:88269]
ENSMUSG00000003477	310.61	855.62	-1.4608	0.0005568	0.0067884	171	98	555	351	1037	889	1007	798	Inmt	indolethylamine N-methyltransferase [Source:MGI Symbol;Acc:MGI:102963]
ENSMUSG00000057751	128.77	292.32	-1.1848	0.00055916	0.0068144	121	195	85	63	246	356	375	328	Megf6	multiple EGF-like-domains 6 [Source:MGI Symbol;Acc:MGI:1919351]
ENSMUSG00000043789	98.09	436.11	-2.1501	0.00056112	0.0068355	30	12	243	95	446	486	406	586	Vwce	von Willebrand factor C and EGF domains [Source:MGI Symbol;Acc:MGI:1919018]
ENSMUSG00000048240	14.4	39.55	-1.469	0.00056192	0.0068396	14	21	11	6	27	40	48	63	Gng7	guanine nucleotide binding protein (G protein), gamma 7 [Source:MGI Symbol;Acc:MGI:95787]
ENSMUSG00000067889	276.87	613.66	-1.1477	0.00056187	0.0068396	97	297	341	297	403	842	772	755	Sptbn2	spectrin beta, non-erythrocytic 2 [Source:MGI Symbol;Acc:MGI:1313261]
ENSMUSG00000059336	10.36	28.34	-1.4424	0.00056421	0.0068562	8	12	11	7	37	36	25	25	Slc14a1	solute carrier family 14 (urea transporter), member 1 [Source:MGI Symbol;Acc:MGI:1351654]
ENSMUSG00000021130	565.05	1129.83	-1.0006	0.00056705	0.006886	620	637	383	396	676	1428	1584	1431	Galnt16	polypeptide N-acetylgalactosaminyltransferase 16 [Source:MGI Symbol;Acc:MGI:1917754]
ENSMUSG00000087684	18.04	4.98	1.8666	0.00057063	0.0069172	15	9	25	18	5	5	9	3	1200007C13Rik	RIKEN cDNA 1200007C13 gene [Source:MGI Symbol;Acc:MGI:1921369]
ENSMUSG00000032515	1786.66	531.73	1.7491	0.00057044	0.0069172	820	610	2726	2577	893	409	642	305	Csrnp1	cysteine-serine-rich nuclear protein 1 [Source:MGI Symbol;Acc:MGI:2387989]
ENSMUSG00000032878	27.53	64.4	-1.2253	0.00057116	0.0069208	25	32	34	10	64	83	81	57	Ccdc85a	coiled-coil domain containing 85A [Source:MGI Symbol;Acc:MGI:2445069]
ENSMUSG00000113321	11.97	1.34	3.1578	0.0005784	0.0070027	5	3	16	21	1	1	1	3	Gm8075	predicted gene 8075 [Source:MGI Symbol;Acc:MGI:3643190]
ENSMUSG00000079652	50.09	12.64	1.9964	0.0005797	0.0070127	20	16	87	67	16	14	19	6	Fam71f2	family with sequence similarity 71, member F2 [Source:MGI Symbol;Acc:MGI:2141439]
ENSMUSG00000038587	4902.89	1688.37	1.5378	0.00058714	0.0070911	8714	3120	2739	2798	789	2345	2220	2359	Akap12	A kinase (PRKA) anchor protein (gravin) 12 [Source:MGI Symbol;Acc:MGI:1932576]
ENSMUSG00000079455	8.54	0.85	3.2587	0.00059361	0.0071577	9	7	7	8	0	2	2	0	Gm16026	predicted pseudogene 16026 [Source:MGI Symbol;Acc:MGI:3783243]
ENSMUSG00000037358	31.12	74.25	-1.2618	0.00059453	0.0071658	34	35	31	13	42	94	94	107	Dipk2b	divergent protein kinase domain 2B [Source:MGI Symbol;Acc:MGI:1923155]
ENSMUSG00000041538	16.12	34.37	-1.0914	0.00059827	0.0071962	14	15	16	14	34	38	44	36	H2-Ob	histocompatibility 2, O region beta locus [Source:MGI Symbol;Acc:MGI:95925]
ENSMUSG00000059434	40.06	5.77	2.7856	0.0006085	0.0072908	101	20	9	8	4	7	8	7	Gckr	glucokinase regulatory protein [Source:MGI Symbol;Acc:MGI:1096345]
ENSMUSG00000032226	30.18	3.68	3.0142	0.00060958	0.0072997	76	13	6	9	1	6	4	6	Gcnt3	glucosaminyl (N-acetyl) transferase 3, mucin type [Source:MGI Symbol;Acc:MGI:1919327]
ENSMUSG00000060314	14.78	35.25	-1.2526	0.0006109	0.0073125	16	11	16	11	39	48	41	27	Zfp941	zinc finger protein 941 [Source:MGI Symbol;Acc:MGI:3039601]
ENSMUSG00000014725	415.82	190.21	1.1273	0.00061454	0.0073471	586	322	320	266	165	277	259	148	Adam28	a disintegrin and metallopeptidase domain 28 [Source:MGI Symbol;Acc:MGI:105988]
ENSMUSG00000107997	31.25	72.14	-1.2103	0.00061733	0.0073746	22	26	31	36	37	119	66	107	Gm44243	predicted gene, 44243 [Source:MGI Symbol;Acc:MGI:5690635]
ENSMUSG00000052544	90.74	189.09	-1.0558	0.00061878	0.0073843	59	42	129	109	178	226	238	197	St6galnac3	ST6 (alpha-N-acetyl-neuraminyl-2,3-beta-galactosyl-1,3)-N-acetylgalactosaminide alpha-2,6-sialyltransferase 3 [Source:MGI Symbol;Acc:MGI:1341828]
ENSMUSG00000049097	40.52	11.53	1.7959	0.0006189	0.0073843	55	40	37	14	4	15	13	21	Ankrd34a	ankyrin repeat domain 34A [Source:MGI Symbol;Acc:MGI:3617846]
ENSMUSG00000021611	40.56	87.41	-1.1033	0.0006195	0.0073886	16	49	52	34	71	109	120	91	Tert	telomerase reverse transcriptase [Source:MGI Symbol;Acc:MGI:1202709]
ENSMUSG00000054510	0.79	9.75	-3.5903	0.00062503	0.0074395	1	0	2	0	6	8	11	19	Gm14461	predicted gene 14461 [Source:MGI Symbol;Acc:MGI:3651589]
ENSMUSG00000032024	2182.61	1019.05	1.0991	0.0006268	0.0074546	1224	1048	3214	2696	1051	1118	1160	1165	Clmp	CXADR-like membrane protein [Source:MGI Symbol;Acc:MGI:1918816]
ENSMUSG00000050875	22.81	47.18	-1.0562	0.00062717	0.007456	24	17	20	22	38	51	73	49	Minar2	membrane integral NOTCH2 associated receptor 2 [Source:MGI Symbol;Acc:MGI:2442934]
ENSMUSG00000030329	180.27	374.32	-1.0556	0.00063113	0.007497	229	119	186	121	260	405	386	633	Pianp	PILR alpha associated neural protein [Source:MGI Symbol;Acc:MGI:2441908]
ENSMUSG00000046219	0	4.85	-4.6	0.0006334	0.007515	0	0	0	0	3	8	4	7	C230012O17Rik	RIKEN cDNA C230012O17 gene [Source:MGI Symbol;Acc:MGI:2442283]
ENSMUSG00000097877	25.49	55.66	-1.1224	0.00063325	0.007515	15	17	34	29	39	87	65	60	Gm26703	predicted gene, 26703 [Source:MGI Symbol;Acc:MGI:5477197]
ENSMUSG00000073399	17.95	4.94	1.8921	0.00063527	0.0075312	22	12	15	16	8	6	2	5	Trim40	tripartite motif-containing 40 [Source:MGI Symbol;Acc:MGI:2684881]
ENSMUSG00000097827	4.6	20.31	-2.1415	0.00063603	0.0075371	0	9	4	4	12	25	22	33	5330439K02Rik	RIKEN cDNA 5330439K02 gene [Source:MGI Symbol;Acc:MGI:1925532]
ENSMUSG00000097742	8.42	0.42	4.2243	0.00063896	0.0075658	10	2	11	8	0	1	0	1	Gm26535	predicted gene, 26535 [Source:MGI Symbol;Acc:MGI:5477029]
ENSMUSG00000040618	1945.16	800.84	1.2802	0.00064234	0.0075967	2086	2910	930	1028	813	910	926	887	Pck2	phosphoenolpyruvate carboxykinase 2 (mitochondrial) [Source:MGI Symbol;Acc:MGI:1860456]
ENSMUSG00000003484	26.22	56.54	-1.1077	0.00065567	0.0077286	31	19	22	23	74	58	56	57	Cyp4f18	cytochrome P450, family 4, subfamily f, polypeptide 18 [Source:MGI Symbol;Acc:MGI:1919304]
ENSMUSG00000025321	1364.31	534.86	1.3512	0.00067066	0.0078657	872	426	1661	2123	568	668	536	584	Itgb8	integrin beta 8 [Source:MGI Symbol;Acc:MGI:1338035]
ENSMUSG00000057716	3.29	14.71	-2.1752	0.00067348	0.0078955	4	3	4	1	8	23	23	13	Tmem178b	transmembrane protein 178B [Source:MGI Symbol;Acc:MGI:3647581]
ENSMUSG00000022111	1146.99	543.75	1.0767	0.00067388	0.0078967	1628	951	749	778	574	644	705	473	Uchl3	ubiquitin carboxyl-terminal esterase L3 (ubiquitin thiolesterase) [Source:MGI Symbol;Acc:MGI:1355274]
ENSMUSG00000086119	24.54	52.97	-1.1006	0.00067616	0.0079113	16	23	32	20	57	64	40	72	Gm2415	predicted gene 2415 [Source:MGI Symbol;Acc:MGI:3780582]
ENSMUSG00000025933	25.5	51.47	-1.0055	0.0006873	0.0080322	16	18	35	26	42	58	61	69	Tmem14a	transmembrane protein 14A [Source:MGI Symbol;Acc:MGI:1922962]
ENSMUSG00000028435	238.41	50.43	2.2427	0.0006911	0.0080702	94	30	308	465	58	26	40	96	Aqp3	aquaporin 3 [Source:MGI Symbol;Acc:MGI:1333777]
ENSMUSG00000026582	94.41	28.6	1.7378	0.0007008	0.0081706	64	51	109	126	58	12	24	24	Sele	selectin, endothelial cell [Source:MGI Symbol;Acc:MGI:98278]
ENSMUSG00000053550	9.59	27.28	-1.5193	0.0007013	0.0081732	8	11	9	7	16	49	35	24	Shisa7	shisa family member 7 [Source:MGI Symbol;Acc:MGI:3605641]
ENSMUSG00000031910	181.15	71.67	1.3406	0.00070353	0.0081959	257	84	131	180	100	79	57	73	Has3	hyaluronan synthase 3 [Source:MGI Symbol;Acc:MGI:109599]
ENSMUSG00000113049	10.08	1.19	3.1312	0.00071139	0.0082745	15	10	7	4	2	0	2	1	Gm48544	predicted gene, 48544 [Source:MGI Symbol;Acc:MGI:6098092]
ENSMUSG00000063727	5697.07	2144.07	1.41	0.00071403	0.0083019	2989	1891	7293	9140	2602	2372	2305	2072	Tnfrsf11b	tumor necrosis factor receptor superfamily, member 11b (osteoprotegerin) [Source:MGI Symbol;Acc:MGI:109587]
ENSMUSG00000090168	3.38	14.24	-2.1029	0.00071901	0.0083467	4	5	1	2	14	15	21	13	D630014O11Rik	RIKEN cDNA D630014O11 gene [Source:MGI Symbol;Acc:MGI:2442874]
ENSMUSG00000109408	79.21	20.33	1.9596	0.00072025	0.0083578	36	15	98	148	13	30	28	21	A930037H05Rik	RIKEN cDNA A930037H05 gene [Source:MGI Symbol;Acc:MGI:1925689]
ENSMUSG00000074653	176.03	453.69	-1.3654	0.00072303	0.0083864	45	214	195	201	282	669	622	482	Lrrc31	leucine rich repeat containing 31 [Source:MGI Symbol;Acc:MGI:2443864]
ENSMUSG00000085363	18.15	2.57	2.8499	0.00072356	0.0083864	6	5	20	37	4	5	1	1	Gm15478	predicted gene 15478 [Source:MGI Symbol;Acc:MGI:3705145]
ENSMUSG00000022494	22.92	88.73	-1.9441	0.00072347	0.0083864	10	3	51	24	66	138	78	117	Shisa9	shisa family member 9 [Source:MGI Symbol;Acc:MGI:1919805]
ENSMUSG00000005640	71.22	24.03	1.5751	0.00072505	0.0084004	35	26	119	89	28	22	22	33	Insrr	insulin receptor-related receptor [Source:MGI Symbol;Acc:MGI:1346037]
ENSMUSG00000108297	2.74	17.31	-2.6743	0.00072643	0.008413	3	2	3	2	2	36	21	22	Gm44167	predicted gene, 44167 [Source:MGI Symbol;Acc:MGI:5690559]
ENSMUSG00000102055	49.57	15.51	1.6701	0.00072759	0.0084166	43	22	34	82	10	19	11	30	Gm28913	predicted gene 28913 [Source:MGI Symbol;Acc:MGI:5579619]
ENSMUSG00000035112	125.53	315.19	-1.3297	0.00073349	0.008465	78	213	89	76	166	405	392	471	Wnk4	WNK lysine deficient protein kinase 4 [Source:MGI Symbol;Acc:MGI:1917097]
ENSMUSG00000030732	221.3	100.05	1.1437	0.00074079	0.0085359	164	327	122	187	84	142	90	131	Chrdl2	chordin-like 2 [Source:MGI Symbol;Acc:MGI:1916371]
ENSMUSG00000029553	45.51	21.22	1.0922	0.00074109	0.0085361	38	28	54	48	13	25	28	30	Tfec	transcription factor EC [Source:MGI Symbol;Acc:MGI:1333760]
ENSMUSG00000048794	12.97	31.2	-1.2547	0.00074367	0.0085625	10	8	16	14	34	28	42	33	Cfap100	cilia and flagella associated protein 100 [Source:MGI Symbol;Acc:MGI:2141635]
ENSMUSG00000024990	7769.71	22815.2	-1.5541	0.00074423	0.0085656	9568	1963	10063	6959	13815	24538	19532	45277	Rbp4	retinol binding protein 4, plasma [Source:MGI Symbol;Acc:MGI:97879]
ENSMUSG00000097028	13.08	2.87	2.1701	0.00075147	0.0086238	11	7	12	18	2	6	3	2	Ptgs2os	prostaglandin-endoperoxide synthase 2, opposite strand [Source:MGI Symbol;Acc:MGI:2443180]
ENSMUSG00000118202	0.27	6.2	-4.231	0.00075128	0.0086238	0	0	0	1	4	7	11	6	C030017B01Rik	RIKEN cDNA C030017B01 gene [Source:MGI Symbol;Acc:MGI:1924774]
ENSMUSG00000037411	27111.5	3732.89	2.8606	0.00075506	0.0086498	8697	2783	45397	46248	6167	2717	3891	3034	Serpine1	serine (or cysteine) peptidase inhibitor, clade E, member 1 [Source:MGI Symbol;Acc:MGI:97608]
ENSMUSG00000024738	6.38	20.92	-1.6968	0.00075535	0.0086498	3	4	10	7	15	21	36	22	Pga5	pepsinogen 5, group I [Source:MGI Symbol;Acc:MGI:1915935]
ENSMUSG00000046959	203.3	54.83	1.8941	0.00076132	0.0087115	373	74	89	183	96	54	35	46	Slc26a1	solute carrier family 26 (sulfate transporter), member 1 [Source:MGI Symbol;Acc:MGI:2385894]
ENSMUSG00000091568	16.36	4.23	1.948	0.00076169	0.0087124	7	13	20	21	3	3	5	8	Gm8206	predicted gene 8206 [Source:MGI Symbol;Acc:MGI:3779788]
ENSMUSG00000043068	74.01	36.6	1.0138	0.00076471	0.0087435	63	51	54	102	32	43	42	46	Fam89a	family with sequence similarity 89, member A [Source:MGI Symbol;Acc:MGI:1916877]
ENSMUSG00000069919	3192.72	1335.62	1.2572	0.00076535	0.0087475	1667	2374	1887	5779	1106	1386	1828	1642	Hba-a1	hemoglobin alpha, adult chain 1 [Source:MGI Symbol;Acc:MGI:96015]
ENSMUSG00000026062	311.32	115.29	1.4373	0.00078207	0.0089061	210	146	416	388	199	85	122	80	Slc9a2	solute carrier family 9 (sodium/hydrogen exchanger), member 2 [Source:MGI Symbol;Acc:MGI:105075]
ENSMUSG00000049112	1079.89	339.53	1.6687	0.00078531	0.0089332	1008	1975	429	443	170	390	436	550	Oxtr	oxytocin receptor [Source:MGI Symbol;Acc:MGI:109147]
ENSMUSG00000038357	8.81	0.63	3.7266	0.00079488	0.0090257	6	11	5	10	0	3	0	0	Camp	cathelicidin antimicrobial peptide [Source:MGI Symbol;Acc:MGI:108443]
ENSMUSG00000032807	11.39	0.7	4.06	0.00080268	0.0090924	1	23	10	8	1	0	2	0	Alox12b	arachidonate 12-lipoxygenase, 12R type [Source:MGI Symbol;Acc:MGI:1274782]
ENSMUSG00000003665	205.28	77.89	1.3958	0.00080495	0.0091086	335	102	111	183	62	115	71	101	Has1	hyaluronan synthase 1 [Source:MGI Symbol;Acc:MGI:106590]
ENSMUSG00000048376	1390.48	2950.94	-1.0853	0.00080565	0.0091095	937	602	2287	1394	2666	3449	3281	3723	F2r	coagulation factor II (thrombin) receptor [Source:MGI Symbol;Acc:MGI:101802]
ENSMUSG00000075324	4.83	17.07	-1.8127	0.00080965	0.0091449	2	5	6	5	11	18	19	29	Fign	fidgetin [Source:MGI Symbol;Acc:MGI:1890647]
ENSMUSG00000004113	68.09	11.7	2.5587	0.0008097	0.0091449	16	15	134	96	25	6	13	4	Cacna1b	calcium channel, voltage-dependent, N type, alpha 1B subunit [Source:MGI Symbol;Acc:MGI:88296]
ENSMUSG00000020190	3142.88	6322.96	-1.0085	0.0008252	0.0093022	1318	4323	3320	2650	5825	7547	6854	7857	Mknk2	MAP kinase-interacting serine/threonine kinase 2 [Source:MGI Symbol;Acc:MGI:894279]
ENSMUSG00000040061	35.46	83.73	-1.229	0.00082585	0.0093059	16	19	61	38	88	101	85	95	Plcb2	phospholipase C, beta 2 [Source:MGI Symbol;Acc:MGI:107465]
ENSMUSG00000051212	26.44	62.6	-1.2317	0.00083079	0.0093534	18	18	32	30	94	64	50	60	Gpr183	G protein-coupled receptor 183 [Source:MGI Symbol;Acc:MGI:2442034]
ENSMUSG00000061878	4151.38	2037.07	1.0274	0.00083107	0.0093534	1978	3351	5673	4508	2711	1854	2204	2042	Sphk1	sphingosine kinase 1 [Source:MGI Symbol;Acc:MGI:1316649]
ENSMUSG00000022676	131.79	317.46	-1.2698	0.00083401	0.0093765	142	162	128	46	208	407	311	507	Snai2	snail family zinc finger 2 [Source:MGI Symbol;Acc:MGI:1096393]
ENSMUSG00000115379	21.05	7.98	1.409	0.00083564	0.0093913	22	16	23	16	9	9	9	8	Gm48990	predicted gene, 48990 [Source:MGI Symbol;Acc:MGI:6118337]
ENSMUSG00000029299	14.5	46.52	-1.6638	0.00083722	0.0094055	8	5	28	14	66	40	36	58	Abcg3	ATP binding cassette subfamily G member 3 [Source:MGI Symbol;Acc:MGI:1351624]
ENSMUSG00000097081	32.6	14.41	1.1649	0.0008515	0.0095477	34	23	32	30	10	23	16	16	Gm10425	predicted gene 10425 [Source:MGI Symbol;Acc:MGI:3642471]
ENSMUSG00000109829	11.99	30.29	-1.3432	0.00086509	0.0096818	10	9	12	13	19	42	27	49	Gm45605	predicted gene 45605 [Source:MGI Symbol;Acc:MGI:5791441]
ENSMUSG00000045733	23.64	71.35	-1.5988	0.00087533	0.0097853	17	40	21	8	32	83	112	99	Sprn	shadow of prion protein [Source:MGI Symbol;Acc:MGI:3582583]
ENSMUSG00000030966	950.24	474.37	1.0029	0.00087742	0.0098013	756	447	1303	1026	511	495	423	656	Trim21	tripartite motif-containing 21 [Source:MGI Symbol;Acc:MGI:106657]
ENSMUSG00000052102	345.5	781.66	-1.1768	0.00087835	0.009808	212	166	493	421	996	724	631	1041	Gnpda1	glucosamine-6-phosphate deaminase 1 [Source:MGI Symbol;Acc:MGI:1347054]
ENSMUSG00000064329	0	4.86	-4.6003	0.00088876	0.0099093	0	0	0	0	3	6	10	3	Scn1a	sodium channel, voltage-gated, type I, alpha [Source:MGI Symbol;Acc:MGI:98246]
ENSMUSG00000106464	11.84	30.8	-1.3786	0.00090544	0.010076	9	6	16	13	17	43	36	44	C130083M11Rik	RIKEN cDNA C130083M11 gene [Source:MGI Symbol;Acc:MGI:3041216]
ENSMUSG00000027249	12.1	64.48	-2.4118	0.00092072	0.010219	4	17	15	9	15	33	40	209	F2	coagulation factor II [Source:MGI Symbol;Acc:MGI:88380]
ENSMUSG00000035930	27.05	80.06	-1.5714	0.00092311	0.010242	30	42	18	7	65	90	134	69	Chst4	carbohydrate sulfotransferase 4 [Source:MGI Symbol;Acc:MGI:1349479]
ENSMUSG00000099338	6.79	27.23	-1.9809	0.00092386	0.010243	4	0	15	7	21	30	34	37	2810030D12Rik	RIKEN cDNA 2810030D12 gene [Source:MGI Symbol;Acc:MGI:1925585]
ENSMUSG00000049907	535.11	1413.37	-1.4017	0.0009243	0.010244	354	901	276	402	601	1923	1942	2006	Rasl11b	RAS-like, family 11, member B [Source:MGI Symbol;Acc:MGI:1916189]
ENSMUSG00000054728	906.01	284.02	1.674	0.00092965	0.010284	325	307	788	1952	328	260	343	311	Phactr1	phosphatase and actin regulator 1 [Source:MGI Symbol;Acc:MGI:2659021]
ENSMUSG00000108053	15.81	3.58	2.1374	0.00093088	0.010291	11	7	11	29	3	4	5	4	Gm43890	predicted gene, 43890 [Source:MGI Symbol;Acc:MGI:5690282]
ENSMUSG00000020611	3589.24	1720.46	1.0611	0.00093102	0.010291	2194	1667	5365	4220	1858	1942	1703	2062	Gna13	guanine nucleotide binding protein, alpha 13 [Source:MGI Symbol;Acc:MGI:95768]
ENSMUSG00000016498	28.94	11.11	1.4026	0.00093287	0.010307	21	17	32	37	15	11	8	14	Pdcd1lg2	programmed cell death 1 ligand 2 [Source:MGI Symbol;Acc:MGI:1930125]
ENSMUSG00000042097	6.21	20.93	-1.7494	0.00094166	0.010397	7	1	9	6	15	19	30	30	Zfp239	zinc finger protein 239 [Source:MGI Symbol;Acc:MGI:1306812]
ENSMUSG00000024842	18.38	6.42	1.5079	0.00096477	0.010629	12	17	22	17	4	7	9	9	Cabp4	calcium binding protein 4 [Source:MGI Symbol;Acc:MGI:1920910]
ENSMUSG00000076873	5.74	0.21	4.3863	0.00096882	0.010661	3	5	3	10	0	0	1	0	Trdv5	T cell receptor delta variable 5 [Source:MGI Symbol;Acc:MGI:3704133]
ENSMUSG00000118590	11.97	2.04	2.5512	0.00096966	0.010667	18	6	9	10	2	1	1	5	Gm15433	predicted pseudogene 15433 [Source:MGI Symbol;Acc:MGI:3705860]
ENSMUSG00000111068	1.88	11.83	-2.64	0.00097036	0.01067	1	1	2	3	9	10	26	8	Gm35501	predicted gene, 35501 [Source:MGI Symbol;Acc:MGI:5594660]
ENSMUSG00000023132	131.77	31.42	2.0802	0.00097651	0.01073	79	144	188	79	77	8	26	15	Gzma	granzyme A [Source:MGI Symbol;Acc:MGI:109266]
ENSMUSG00000028713	52.72	118.48	-1.1725	0.0009787	0.010738	50	70	43	28	78	119	130	207	Cyp4b1	cytochrome P450, family 4, subfamily b, polypeptide 1 [Source:MGI Symbol;Acc:MGI:103225]
ENSMUSG00000082100	20.29	58.64	-1.5179	0.00097862	0.010738	11	7	39	20	63	72	42	81	Glns-ps1	glutamine synthetase pseudogene 1 [Source:MGI Symbol;Acc:MGI:95740]
ENSMUSG00000068587	130.67	399.32	-1.6103	0.00098044	0.010749	110	20	230	131	414	428	415	503	Mgam	maltase-glucoamylase [Source:MGI Symbol;Acc:MGI:1203495]
ENSMUSG00000031519	361.76	154.8	1.2244	0.0009816	0.010755	326	115	521	383	120	193	221	160	Asb5	ankyrin repeat and SOCs box-containing 5 [Source:MGI Symbol;Acc:MGI:1923544]
ENSMUSG00000067714	3.62	16.01	-2.101	0.00099387	0.010868	1	1	9	3	15	18	16	22	Lpar5	lysophosphatidic acid receptor 5 [Source:MGI Symbol;Acc:MGI:2685918]
ENSMUSG00000115441	12.85	1.69	2.8677	0.0010018	0.010939	12	22	6	6	0	5	2	1	Gm34759	predicted gene, 34759 [Source:MGI Symbol;Acc:MGI:5593918]
ENSMUSG00000110887	97.98	23.74	2.0357	0.0010101	0.011005	108	144	46	52	2	39	28	42	Cbx3-ps8	chromobox 3, pseudogene 8 [Source:MGI Symbol;Acc:MGI:3648352]
ENSMUSG00000113836	15.14	40.59	-1.4345	0.0010145	0.011045	15	18	14	8	18	68	58	42	Gm3325	predicted gene 3325 [Source:MGI Symbol;Acc:MGI:3781503]
ENSMUSG00000017754	3344.89	7799.76	-1.2215	0.0010217	0.011111	4055	1296	4087	2823	4642	9931	7557	13201	Pltp	phospholipid transfer protein [Source:MGI Symbol;Acc:MGI:103151]
ENSMUSG00000086775	27.21	100.87	-1.8932	0.0010244	0.011132	14	56	22	7	40	143	179	101	Snhg7os	small nucleolar RNA host gene 7, opposite strand [Source:MGI Symbol;Acc:MGI:3045374]
ENSMUSG00000035818	437.14	114.99	1.9244	0.0010257	0.011139	792	206	176	370	30	265	108	131	Plekhs1	pleckstrin homology domain containing, family S member 1 [Source:MGI Symbol;Acc:MGI:2443041]
ENSMUSG00000086962	5.05	21.15	-2.0948	0.0010277	0.011156	6	6	2	4	5	32	31	30	Gm12248	predicted gene 12248 [Source:MGI Symbol;Acc:MGI:3651124]
ENSMUSG00000028020	11.03	28.62	-1.3859	0.0010419	0.011283	14	6	10	10	23	31	48	26	Glrb	glycine receptor, beta subunit [Source:MGI Symbol;Acc:MGI:95751]
ENSMUSG00000024365	9.6	61.7	-2.687	0.0010501	0.011362	7	13	8	7	7	26	30	223	Cyp21a1	cytochrome P450, family 21, subfamily a, polypeptide 1 [Source:MGI Symbol;Acc:MGI:88591]
ENSMUSG00000058794	25.94	6.68	1.9833	0.0010585	0.011436	29	37	16	11	12	3	7	6	Nfe2	nuclear factor, erythroid derived 2 [Source:MGI Symbol;Acc:MGI:97308]
ENSMUSG00000040888	655.49	302.27	1.1167	0.0010736	0.011573	982	548	414	396	339	304	330	352	Gfer	growth factor, augmenter of liver regeneration [Source:MGI Symbol;Acc:MGI:107757]
ENSMUSG00000025203	2855.04	6642.2	-1.218	0.0010733	0.011573	1291	1376	5251	2906	5905	8045	7035	8575	Scd2	stearoyl-Coenzyme A desaturase 2 [Source:MGI Symbol;Acc:MGI:98240]
ENSMUSG00000037709	1094.33	7003.13	-2.6779	0.0010761	0.011596	66	923	1861	1314	11204	5728	6368	6467	Fam13a	family with sequence similarity 13, member A [Source:MGI Symbol;Acc:MGI:1889842]
ENSMUSG00000045027	119.62	21.69	2.4783	0.0010768	0.0116	71	44	170	163	61	13	7	4	Prss22	protease, serine 22 [Source:MGI Symbol;Acc:MGI:1918085]
ENSMUSG00000017453	0.25	7.02	-4.411	0.0010869	0.011696	0	0	1	0	3	4	6	19	Pipox	pipecolic acid oxidase [Source:MGI Symbol;Acc:MGI:1197006]
ENSMUSG00000043398	22.12	47.1	-1.104	0.0010901	0.011721	25	22	18	15	30	66	50	67	Gpr135	G protein-coupled receptor 135 [Source:MGI Symbol;Acc:MGI:2676315]
ENSMUSG00000000628	7405.39	2177.95	1.7657	0.0010932	0.011742	4020	1399	11308	11160	3580	1624	1953	2071	Hk2	hexokinase 2 [Source:MGI Symbol;Acc:MGI:1315197]
ENSMUSG00000010051	294.69	864.97	-1.5528	0.0010931	0.011742	74	140	378	517	849	1117	1172	693	Hyal1	hyaluronoglucosaminidase 1 [Source:MGI Symbol;Acc:MGI:96298]
ENSMUSG00000064373	7196.55	15812.2	-1.1356	0.0010943	0.011749	5648	2613	11117	7515	13896	17835	15771	22874	Selenop	selenoprotein P [Source:MGI Symbol;Acc:MGI:894288]
ENSMUSG00000097365	3.04	13.2	-2.1322	0.0010996	0.011802	3	1	1	6	11	17	17	14	C030034L19Rik	RIKEN cDNA C030034L19 gene [Source:MGI Symbol;Acc:MGI:2444519]
ENSMUSG00000017417	223	579.98	-1.378	0.0011015	0.011814	192	60	363	219	639	602	455	849	Plxdc1	plexin domain containing 1 [Source:MGI Symbol;Acc:MGI:1919574]
ENSMUSG00000010086	3.7	17.32	-2.2582	0.001106	0.011845	5	7	1	0	16	24	23	14	Rnf112	ring finger protein 112 [Source:MGI Symbol;Acc:MGI:106611]
ENSMUSG00000094162	11.06	0.86	3.644	0.0011107	0.011882	4	7	9	21	0	0	0	4	Gm2457	predicted gene, 2457 [Source:MGI Symbol;Acc:MGI:3780624]
ENSMUSG00000031384	12.28	1.03	3.6954	0.0011124	0.011884	9	1	18	18	3	1	0	0	Asb9	ankyrin repeat and SOCS box-containing 9 [Source:MGI Symbol;Acc:MGI:1916549]
ENSMUSG00000045231	1.1	8.89	-3.031	0.001129	0.012022	1	1	1	1	6	7	10	17	BC106179	cDNA sequence BC106179 [Source:MGI Symbol;Acc:MGI:3702726]
ENSMUSG00000064280	39.3	18.61	1.0787	0.0011321	0.012042	31	23	43	48	16	24	22	21	Ccdc146	coiled-coil domain containing 146 [Source:MGI Symbol;Acc:MGI:1922422]
ENSMUSG00000055421	7.95	33.35	-2.062	0.001133	0.012047	5	5	15	5	6	51	38	60	Pcdh9	protocadherin 9 [Source:MGI Symbol;Acc:MGI:1306801]
ENSMUSG00000098055	4.87	16.07	-1.7248	0.0011356	0.012066	3	4	5	6	9	22	21	21	Gm26947	predicted gene, 26947 [Source:MGI Symbol;Acc:MGI:5504062]
ENSMUSG00000021868	837.31	376.05	1.1555	0.0011396	0.012105	1191	394	766	676	506	390	358	372	Ppif	peptidylprolyl isomerase F (cyclophilin F) [Source:MGI Symbol;Acc:MGI:2145814]
ENSMUSG00000037016	25.06	65.19	-1.372	0.0011451	0.01215	11	10	33	40	55	77	95	64	Frem2	Fras1 related extracellular matrix protein 2 [Source:MGI Symbol;Acc:MGI:2444465]
ENSMUSG00000036960	136.83	66.26	1.0528	0.0011529	0.01222	79	109	200	123	82	52	61	93	Clca2	chloride channel accessory 2 [Source:MGI Symbol;Acc:MGI:2139758]
ENSMUSG00000066687	352.1	1083.88	-1.6216	0.0011568	0.012257	115	152	660	414	431	1676	1682	1188	Zbtb16	zinc finger and BTB domain containing 16 [Source:MGI Symbol;Acc:MGI:103222]
ENSMUSG00000025557	18.2	5.16	1.8491	0.0011657	0.012344	15	8	18	26	8	3	6	5	Slc15a1	solute carrier family 15 (oligopeptide transporter), member 1 [Source:MGI Symbol;Acc:MGI:1861376]
ENSMUSG00000098050	23.75	7.41	1.6591	0.0011784	0.012441	24	14	25	24	3	13	4	14	Gm5345	predicted gene 5345 [Source:MGI Symbol;Acc:MGI:3644320]
ENSMUSG00000003949	8.53	37.21	-2.1185	0.0011944	0.012573	1	3	8	20	17	45	60	48	Hlf	hepatic leukemia factor [Source:MGI Symbol;Acc:MGI:96108]
ENSMUSG00000050069	69.27	23.33	1.5866	0.0012164	0.012737	52	73	68	61	45	16	8	28	Grem2	gremlin 2, DAN family BMP antagonist [Source:MGI Symbol;Acc:MGI:1344367]
ENSMUSG00000085068	49.43	12.86	1.9335	0.0012208	0.012761	95	36	13	29	9	20	17	12	Gm15895	predicted gene 15895 [Source:MGI Symbol;Acc:MGI:3802071]
ENSMUSG00000044156	1.54	10.97	-2.7611	0.0012252	0.012803	0	1	4	1	16	7	11	13	Hepacam2	HEPACAM family member 2 [Source:MGI Symbol;Acc:MGI:2141520]
ENSMUSG00000038094	492.62	190.41	1.3737	0.0012266	0.012813	258	243	676	667	306	195	190	119	Atp13a4	ATPase type 13A4 [Source:MGI Symbol;Acc:MGI:1924456]
ENSMUSG00000036949	7.18	28.33	-2.009	0.0012386	0.012924	15	6	2	2	19	47	27	35	Slc39a12	solute carrier family 39 (zinc transporter), member 12 [Source:MGI Symbol;Acc:MGI:2139274]
ENSMUSG00000031898	11.11	1.69	2.6527	0.0012423	0.012948	14	12	9	5	0	5	2	1	Dpep3	dipeptidase 3 [Source:MGI Symbol;Acc:MGI:1919104]
ENSMUSG00000101445	0.84	8.53	-3.3851	0.0012555	0.013064	1	0	0	2	4	13	10	12	Gm28932	predicted gene 28932 [Source:MGI Symbol;Acc:MGI:5579638]
ENSMUSG00000070323	10.27	27.69	-1.4332	0.0012643	0.013137	9	7	14	8	14	31	34	47	Mmp27	matrix metallopeptidase 27 [Source:MGI Symbol;Acc:MGI:3039232]
ENSMUSG00000091297	30.46	8.47	1.8249	0.0012662	0.013151	39	38	20	12	3	14	15	7	Gm8439	predicted gene 8439 [Source:MGI Symbol;Acc:MGI:3648581]
ENSMUSG00000031576	8.42	22.95	-1.4515	0.0012761	0.013246	4	11	8	8	14	32	33	25	Kcnu1	potassium channel, subfamily U, member 1 [Source:MGI Symbol;Acc:MGI:1202300]
ENSMUSG00000016763	226.03	102.29	1.1472	0.0012819	0.013286	128	118	265	330	129	120	113	83	Scube1	signal peptide, CUB domain, EGF-like 1 [Source:MGI Symbol;Acc:MGI:1890616]
ENSMUSG00000087178	18.98	40.54	-1.0958	0.0012922	0.013361	19	12	14	24	45	49	38	46	A230056P14Rik	RIKEN cDNA A230056P14 gene [Source:MGI Symbol;Acc:MGI:2444856]
ENSMUSG00000003872	11.83	32.7	-1.4725	0.001295	0.01338	9	19	10	5	27	33	56	30	Lin7b	lin-7 homolog B (C. elegans) [Source:MGI Symbol;Acc:MGI:1330858]
ENSMUSG00000109715	8.98	22.8	-1.3506	0.0013025	0.01343	7	7	9	10	15	32	24	32	Gm45606	predicted gene 45606 [Source:MGI Symbol;Acc:MGI:5791442]
ENSMUSG00000115902	148.39	69.43	1.0924	0.0013069	0.01347	139	182	106	110	52	106	46	108	D730005E14Rik	RIKEN cDNA D730005E14 gene [Source:NCBI gene (formerly Entrezgene);Acc:109361]
ENSMUSG00000086938	46.77	97.2	-1.0567	0.0013153	0.013538	29	56	36	50	82	135	69	148	4930481A15Rik	RIKEN cDNA 4930481A15 gene [Source:MGI Symbol;Acc:MGI:1922181]
ENSMUSG00000026241	39.85	14.69	1.4327	0.0013211	0.013588	29	58	32	26	10	9	23	24	Nppc	natriuretic peptide type C [Source:MGI Symbol;Acc:MGI:97369]
ENSMUSG00000085996	0	4.23	-4.3973	0.0013289	0.013654	0	0	0	0	3	5	4	7	A830012C17Rik	RIKEN cDNA A830012C17 gene [Source:MGI Symbol;Acc:MGI:2441830]
ENSMUSG00000038453	24.1	9.06	1.4146	0.0013459	0.013795	14	31	17	26	9	8	11	12	Srcin1	SRC kinase signaling inhibitor 1 [Source:MGI Symbol;Acc:MGI:1933179]
ENSMUSG00000098766	18.84	5.73	1.7356	0.001347	0.013797	16	7	26	21	7	8	6	4	Mir6386	microRNA 6386 [Source:MGI Symbol;Acc:MGI:5531224]
ENSMUSG00000039691	2.42	12.88	-2.3983	0.0013717	0.014002	3	0	4	2	12	9	11	25	Tspan10	tetraspanin 10 [Source:MGI Symbol;Acc:MGI:2384781]
ENSMUSG00000025262	55.69	115.04	-1.0438	0.0013742	0.014023	34	27	65	81	96	148	149	121	Fam120c	family with sequence similarity 120, member C [Source:MGI Symbol;Acc:MGI:2387687]
ENSMUSG00000097705	1.37	8.72	-2.6795	0.0013822	0.014095	1	1	1	2	7	9	13	10	Gm26740	predicted gene, 26740 [Source:MGI Symbol;Acc:MGI:5477234]
ENSMUSG00000038059	394.37	163.18	1.2762	0.0014045	0.014288	280	179	628	390	261	148	158	127	Smim3	small integral membrane protein 3 [Source:MGI Symbol;Acc:MGI:1917088]
ENSMUSG00000114055	4.89	0.27	4.1559	0.001412	0.014353	4	5	6	3	1	0	0	0	Gm32089	predicted gene, 32089 [Source:MGI Symbol;Acc:MGI:5591248]
ENSMUSG00000034028	5.71	18.18	-1.6742	0.0014128	0.014357	5	6	7	3	12	19	33	18	Cd226	CD226 antigen [Source:MGI Symbol;Acc:MGI:3039602]
ENSMUSG00000041669	4.77	16.81	-1.8422	0.0014196	0.014412	7	5	3	2	15	28	20	12	Prima1	proline rich membrane anchor 1 [Source:MGI Symbol;Acc:MGI:1926097]
ENSMUSG00000001739	189.18	480.37	-1.3451	0.0014268	0.014474	191	286	155	51	420	518	689	512	Cldn15	claudin 15 [Source:MGI Symbol;Acc:MGI:1913103]
ENSMUSG00000014602	46.52	22.08	1.0854	0.0014281	0.014482	36	25	65	47	24	22	24	27	Kif1a	kinesin family member 1A [Source:MGI Symbol;Acc:MGI:108391]
ENSMUSG00000017692	91.32	40.57	1.1657	0.0014358	0.014533	98	114	75	43	30	41	45	66	Rhbdl3	rhomboid like 3 [Source:MGI Symbol;Acc:MGI:2179276]
ENSMUSG00000001334	17.7	41.99	-1.2586	0.0014404	0.014572	19	22	15	8	26	51	66	47	Fndc5	fibronectin type III domain containing 5 [Source:MGI Symbol;Acc:MGI:1917614]
ENSMUSG00000047344	28.22	76.86	-1.4391	0.0014414	0.014578	14	10	52	31	45	121	87	96	Lancl3	LanC lantibiotic synthetase component C-like 3 (bacterial) [Source:MGI Symbol;Acc:MGI:2443335]
ENSMUSG00000090691	6.88	0.7	3.3353	0.0014549	0.014679	7	7	6	5	1	0	1	1	Gm3667	predicted gene 3667 [Source:MGI Symbol;Acc:MGI:3781843]
ENSMUSG00000054200	11.94	33.04	-1.4694	0.0014673	0.014779	9	7	12	16	21	30	31	67	Ffar4	free fatty acid receptor 4 [Source:MGI Symbol;Acc:MGI:2147577]
ENSMUSG00000047749	51	112.57	-1.1458	0.00147	0.014801	50	33	55	49	46	161	125	184	Zc3hav1l	zinc finger CCCH-type, antiviral 1-like [Source:MGI Symbol;Acc:MGI:2443387]
ENSMUSG00000002104	12.51	28.39	-1.1762	0.0014859	0.014931	12	11	16	7	30	30	34	31	Rapsn	receptor-associated protein of the synapse [Source:MGI Symbol;Acc:MGI:99422]
ENSMUSG00000020175	47.79	101.3	-1.0774	0.0014898	0.01496	30	26	85	39	83	130	132	108	Rab36	RAB36, member RAS oncogene family [Source:MGI Symbol;Acc:MGI:1924127]
ENSMUSG00000026819	1119.4	537.89	1.0579	0.0015066	0.015113	1077	460	1123	1449	659	571	649	465	Slc25a25	solute carrier family 25 (mitochondrial carrier, phosphate carrier), member 25 [Source:MGI Symbol;Acc:MGI:1915913]
ENSMUSG00000041817	30.03	11.01	1.435	0.0015079	0.015115	16	30	20	44	6	13	15	16	Fam169a	family with sequence similarity 169, member A [Source:MGI Symbol;Acc:MGI:2444268]
ENSMUSG00000027220	19.04	39.26	-1.0358	0.0015091	0.015119	12	20	18	20	44	35	44	49	Syt13	synaptotagmin XIII [Source:MGI Symbol;Acc:MGI:1933945]
ENSMUSG00000108732	34.47	15.13	1.1948	0.0015092	0.015119	27	18	46	37	15	22	14	16	2310043P16Rik	RIKEN cDNA 2310043P16 gene [Source:MGI Symbol;Acc:MGI:1917385]
ENSMUSG00000038347	7.78	22.33	-1.5335	0.001519	0.015201	7	11	4	6	21	26	17	35	Tcte2	t-complex-associated testis expressed 2 [Source:MGI Symbol;Acc:MGI:98641]
ENSMUSG00000110588	62.89	21.7	1.5532	0.0015233	0.015234	26	42	78	89	39	15	16	21	Gm45774	predicted gene 45774 [Source:MGI Symbol;Acc:MGI:5804889]
ENSMUSG00000089753	1.29	9.92	-2.8929	0.001523	0.015234	0	1	3	1	6	14	19	6	Cd300ld2	CD300 molecule like family member D2 [Source:MGI Symbol;Acc:MGI:3649405]
ENSMUSG00000055137	184.44	87.02	1.0802	0.0015249	0.015245	237	198	108	117	65	117	124	85	Sugct	succinyl-CoA glutarate-CoA transferase [Source:MGI Symbol;Acc:MGI:1923221]
ENSMUSG00000097601	14.84	31.44	-1.0796	0.0015295	0.015286	10	13	19	13	24	38	37	42	Gm26660	predicted gene, 26660 [Source:MGI Symbol;Acc:MGI:5477154]
ENSMUSG00000002289	2706.9	1204.03	1.1685	0.00154	0.01537	3261	3269	1619	1549	672	1273	1482	2034	Angptl4	angiopoietin-like 4 [Source:MGI Symbol;Acc:MGI:1888999]
ENSMUSG00000044694	11.74	33.14	-1.5159	0.0015409	0.015374	15	9	5	13	17	48	31	55	2010007H06Rik	RIKEN cDNA 2010007H06 gene [Source:MGI Symbol;Acc:MGI:1917099]
ENSMUSG00000015405	24.08	55.6	-1.2006	0.0015493	0.015447	18	28	33	10	66	65	68	44	Ace2	angiotensin I converting enzyme (peptidyl-dipeptidase A) 2 [Source:MGI Symbol;Acc:MGI:1917258]
ENSMUSG00000015854	2.22	13.09	-2.5605	0.0015584	0.015522	3	2	2	1	23	8	6	18	Cd5l	CD5 antigen-like [Source:MGI Symbol;Acc:MGI:1334419]
ENSMUSG00000087135	43.63	11.78	1.9003	0.0015613	0.015546	17	14	58	75	15	5	17	14	Gm16096	predicted gene 16096 [Source:MGI Symbol;Acc:MGI:3801985]
ENSMUSG00000085071	3.37	14.56	-2.069	0.0015646	0.015568	0	2	7	4	12	16	14	23	Gm14066	predicted gene 14066 [Source:MGI Symbol;Acc:MGI:3649728]
ENSMUSG00000047728	78.87	28.07	1.5051	0.0015642	0.015568	83	35	94	78	53	17	27	20	Ly6g2	lymphocyte antigen 6 complex, locus G2 [Source:MGI Symbol;Acc:MGI:2385015]
ENSMUSG00000060402	817.96	1791.79	-1.1313	0.001566	0.015572	343	1329	720	610	1405	2281	2550	1794	Chst8	carbohydrate sulfotransferase 8 [Source:MGI Symbol;Acc:MGI:1916197]
ENSMUSG00000037440	80.81	36.76	1.1307	0.0015738	0.015629	102	78	74	38	27	37	55	46	Vnn1	vanin 1 [Source:MGI Symbol;Acc:MGI:108395]
ENSMUSG00000025742	1198.47	3342.8	-1.4796	0.0015777	0.015662	874	280	2223	1146	4252	3234	2615	4410	Prps2	phosphoribosyl pyrophosphate synthetase 2 [Source:MGI Symbol;Acc:MGI:97776]
ENSMUSG00000117406	20.45	43.94	-1.1149	0.0015852	0.015731	19	27	15	13	31	64	58	45	Ntn3	netrin 3 [Source:MGI Symbol;Acc:MGI:1341188]
ENSMUSG00000090291	19.07	61.23	-1.6885	0.0015925	0.015795	16	34	16	3	38	72	104	63	Lrrc10b	leucine rich repeat containing 10B [Source:MGI Symbol;Acc:MGI:2685551]
ENSMUSG00000085434	15.15	3.58	2.0746	0.0016007	0.015866	14	7	8	26	3	6	4	3	Gm11725	predicted gene 11725 [Source:MGI Symbol;Acc:MGI:3649385]
ENSMUSG00000043439	70.41	32.44	1.1324	0.0016124	0.015963	59	54	66	79	51	20	34	33	Epop	elongin BC and polycomb repressive complex 2 associated protein [Source:MGI Symbol;Acc:MGI:2143991]
ENSMUSG00000035829	29.49	61.67	-1.0739	0.0016329	0.016134	24	33	19	31	35	85	66	94	Ppp1r26	protein phosphatase 1, regulatory subunit 26 [Source:MGI Symbol;Acc:MGI:2685193]
ENSMUSG00000004961	20.65	7.2	1.5401	0.0016488	0.016233	17	18	12	28	10	6	8	7	Syt5	synaptotagmin V [Source:MGI Symbol;Acc:MGI:1926368]
ENSMUSG00000060044	53.17	23.83	1.1545	0.0016485	0.016233	51	69	48	25	21	23	31	31	Tmem26	transmembrane protein 26 [Source:MGI Symbol;Acc:MGI:2143537]
ENSMUSG00000063354	1233.42	387.1	1.6716	0.0016547	0.016273	2495	979	436	401	321	515	402	492	Slc39a4	solute carrier family 39 (zinc transporter), member 4 [Source:MGI Symbol;Acc:MGI:1919277]
ENSMUSG00000097709	26.92	65.26	-1.2712	0.0016563	0.016281	11	25	41	24	51	103	96	43	2810429I04Rik	RIKEN cDNA 2810429I04 gene [Source:MGI Symbol;Acc:MGI:1924187]
ENSMUSG00000037263	4.09	14.93	-1.8654	0.0016566	0.016281	3	2	3	7	15	17	23	11	Aldh3b3	aldehyde dehydrogenase 3 family, member B3 [Source:MGI Symbol;Acc:MGI:1920708]
ENSMUSG00000021922	7.42	20.7	-1.4821	0.001668	0.016382	8	6	7	6	22	16	33	20	Itih4	inter alpha-trypsin inhibitor, heavy chain 4 [Source:MGI Symbol;Acc:MGI:109536]
ENSMUSG00000024694	9.64	35.3	-1.8698	0.0016744	0.016422	1	13	11	11	11	60	45	47	Keg1	kidney expressed gene 1 [Source:MGI Symbol;Acc:MGI:1928492]
ENSMUSG00000074673	9.26	1.28	2.7932	0.001679	0.016447	13	10	5	5	0	2	3	1	Ttll9	tubulin tyrosine ligase-like family, member 9 [Source:MGI Symbol;Acc:MGI:1913589]
ENSMUSG00000029446	336.87	137.03	1.2974	0.001682	0.016465	455	428	164	151	145	132	183	143	Psph	phosphoserine phosphatase [Source:MGI Symbol;Acc:MGI:97788]
ENSMUSG00000090081	10.78	2.09	2.3992	0.0016834	0.016473	6	5	11	18	3	2	3	1	Gm16587	predicted gene 16587 [Source:MGI Symbol;Acc:MGI:4415007]
ENSMUSG00000038776	949.56	2521.5	-1.4093	0.0016874	0.016496	1184	1235	466	501	915	3607	3372	3698	Ephx1	epoxide hydrolase 1, microsomal [Source:MGI Symbol;Acc:MGI:95405]
ENSMUSG00000054426	16.72	34.19	-1.0327	0.0016975	0.016584	13	19	14	15	35	43	41	32	A930005H10Rik	RIKEN cDNA A930005H10 gene [Source:MGI Symbol;Acc:MGI:1915411]
ENSMUSG00000096960	26.72	11.82	1.1751	0.0016987	0.01659	15	25	31	28	9	14	16	14	A230028O05Rik	RIKEN cDNA A230028O05 gene [Source:MGI Symbol;Acc:MGI:2442126]
ENSMUSG00000029377	28.31	11.1	1.3459	0.0017024	0.016621	20	15	34	36	8	16	17	9	Ereg	epiregulin [Source:MGI Symbol;Acc:MGI:107508]
ENSMUSG00000057604	5078.43	939.39	2.4347	0.0017088	0.016662	1503	927	8829	8084	1577	695	992	708	Lmcd1	LIM and cysteine-rich domains 1 [Source:MGI Symbol;Acc:MGI:1353635]
ENSMUSG00000031849	15.66	32.53	-1.0615	0.0017112	0.016674	13	14	11	19	28	38	43	36	Comp	cartilage oligomeric matrix protein [Source:MGI Symbol;Acc:MGI:88469]
ENSMUSG00000079355	51.66	134.71	-1.3764	0.0017156	0.016711	33	18	105	40	163	163	150	112	Ackr4	atypical chemokine receptor 4 [Source:MGI Symbol;Acc:MGI:2181676]
ENSMUSG00000114705	5.06	24.31	-2.2562	0.0017163	0.016712	1	1	5	12	9	47	28	28	Gm18760	predicted gene, 18760 [Source:MGI Symbol;Acc:MGI:5010945]
ENSMUSG00000026295	16.45	66.87	-2.0258	0.0017196	0.016734	8	26	11	15	23	28	65	190	Spp2	secreted phosphoprotein 2 [Source:MGI Symbol;Acc:MGI:1922646]
ENSMUSG00000022015	11.31	2.31	2.3102	0.0017824	0.017254	17	6	13	5	3	2	2	3	Tnfsf11	tumor necrosis factor (ligand) superfamily, member 11 [Source:MGI Symbol;Acc:MGI:1100089]
ENSMUSG00000039232	1610.92	686.98	1.2303	0.0017998	0.0174	1081	780	2268	1883	1147	610	536	615	Stx11	syntaxin 11 [Source:MGI Symbol;Acc:MGI:1921982]
ENSMUSG00000032174	18.63	43.35	-1.208	0.0017992	0.0174	10	14	31	15	34	42	72	46	Icam5	intercellular adhesion molecule 5, telencephalin [Source:MGI Symbol;Acc:MGI:109430]
ENSMUSG00000081665	26.79	9.12	1.5296	0.001803	0.017424	31	20	21	25	3	11	20	8	Gm15922	predicted gene 15922 [Source:MGI Symbol;Acc:MGI:3802148]
ENSMUSG00000042228	2266.95	1082.57	1.0661	0.001813	0.01751	3538	1150	1853	1601	956	1378	1331	1157	Lyn	LYN proto-oncogene, Src family tyrosine kinase [Source:MGI Symbol;Acc:MGI:96892]
ENSMUSG00000014852	21.12	6.73	1.6906	0.0018362	0.017699	22	13	19	23	13	6	3	6	Adamts13	a disintegrin-like and metallopeptidase (reprolysin type) with thrombospondin type 1 motif, 13 [Source:MGI Symbol;Acc:MGI:2685556]
ENSMUSG00000023153	32.47	75.52	-1.2209	0.0018524	0.017815	20	54	23	21	64	86	122	65	Tmem52	transmembrane protein 52 [Source:MGI Symbol;Acc:MGI:1916921]
ENSMUSG00000055202	32.37	69.74	-1.1167	0.0018629	0.017898	34	40	26	17	39	104	84	90	Zfp811	zinc finger protein 811 [Source:MGI Symbol;Acc:MGI:2682944]
ENSMUSG00000108290	18.7	51.53	-1.4516	0.0018636	0.0179	3	15	32	21	37	75	61	59	Gm44120	predicted gene, 44120 [Source:MGI Symbol;Acc:MGI:5690512]
ENSMUSG00000062380	28.54	11.22	1.33	0.0018838	0.018076	22	39	25	18	6	13	14	18	Tubb3	tubulin, beta 3 class III [Source:MGI Symbol;Acc:MGI:107813]
ENSMUSG00000042797	12.7	30.86	-1.2745	0.0019006	0.018203	6	17	15	9	29	42	24	42	Aqp11	aquaporin 11 [Source:MGI Symbol;Acc:MGI:1913583]
ENSMUSG00000115186	37.41	88.42	-1.2332	0.0019006	0.018203	20	14	61	46	87	99	83	122	Gm49417	predicted gene, 49417 [Source:MGI Symbol;Acc:MGI:6155048]
ENSMUSG00000079092	194.38	66.17	1.5552	0.0019007	0.018203	50	87	254	341	55	57	82	101	Prl2c2	prolactin family 2, subfamily c, member 2 [Source:MGI Symbol;Acc:MGI:97618]
ENSMUSG00000034161	17.11	40.61	-1.2606	0.0019054	0.018242	16	16	11	19	18	66	52	50	Scx	scleraxis [Source:MGI Symbol;Acc:MGI:102934]
ENSMUSG00000089812	17.36	38.88	-1.1643	0.0019094	0.018268	9	24	19	12	27	42	58	48	Gm15867	predicted gene 15867 [Source:MGI Symbol;Acc:MGI:3801862]
ENSMUSG00000031104	33.84	10.01	1.7562	0.0019232	0.018382	17	9	46	55	7	9	15	14	Rab33a	RAB33A, member RAS oncogene family [Source:MGI Symbol;Acc:MGI:109493]
ENSMUSG00000035284	881.37	2174.65	-1.3028	0.0019268	0.018411	294	489	1222	1310	1384	3524	2918	2023	Vps13c	vacuolar protein sorting 13C [Source:MGI Symbol;Acc:MGI:2444207]
ENSMUSG00000049939	32.49	12.3	1.404	0.0019301	0.018436	20	22	55	25	10	16	8	21	Lrrc4	leucine rich repeat containing 4 [Source:MGI Symbol;Acc:MGI:2182081]
ENSMUSG00000023987	4.47	16.49	-1.9088	0.0019334	0.018445	4	8	2	2	9	23	27	16	Pgc	progastricsin (pepsinogen C) [Source:MGI Symbol;Acc:MGI:98909]
ENSMUSG00000100486	0.77	8.88	-3.4649	0.0019359	0.018462	0	1	2	0	6	10	4	20	Gm4131	predicted gene 4131 [Source:MGI Symbol;Acc:MGI:3782307]
ENSMUSG00000056380	16.8	5.74	1.5685	0.0019397	0.018492	14	9	19	20	7	5	5	8	Gpr50	G-protein-coupled receptor 50 [Source:MGI Symbol;Acc:MGI:1333877]
ENSMUSG00000032495	12.26	2.67	2.1991	0.0019464	0.018526	6	5	17	18	2	5	2	3	Lrrc2	leucine rich repeat containing 2 [Source:MGI Symbol;Acc:MGI:1921499]
ENSMUSG00000045281	3.03	12.02	-1.9849	0.0019461	0.018526	4	2	3	2	16	11	12	13	Gpr20	G protein-coupled receptor 20 [Source:MGI Symbol;Acc:MGI:2441803]
ENSMUSG00000022040	46.78	113.29	-1.2745	0.0019685	0.018719	44	20	61	48	100	87	88	228	Ephx2	epoxide hydrolase 2, cytoplasmic [Source:MGI Symbol;Acc:MGI:99500]
ENSMUSG00000105797	14.04	3.58	1.972	0.0019751	0.01877	4	17	13	18	3	6	3	4	Gm5149	predicted gene 5149 [Source:MGI Symbol;Acc:MGI:3648405]
ENSMUSG00000072762	27.62	55.13	-1.0035	0.0019812	0.018816	26	29	30	16	36	74	56	83	4930522L14Rik	RIKEN cDNA 4930522L14 gene [Source:MGI Symbol;Acc:MGI:1925270]
ENSMUSG00000029867	7.63	1.18	2.7434	0.0019922	0.018884	5	8	7	8	2	1	0	2	Llcfc1	LLLL and CFNLAS motif containing 1 [Source:MGI Symbol;Acc:MGI:1923856]
ENSMUSG00000070407	242.73	531.29	-1.1294	0.0019935	0.01889	70	331	268	232	531	600	623	594	Hs3st3b1	heparan sulfate (glucosamine) 3-O-sulfotransferase 3B1 [Source:MGI Symbol;Acc:MGI:1333853]
ENSMUSG00000104126	47.47	23.63	1.0164	0.0020234	0.019115	45	29	48	52	29	26	30	18	Gm37486	predicted gene, 37486 [Source:MGI Symbol;Acc:MGI:5610714]
ENSMUSG00000115869	3.91	0	4.5455	0.0020245	0.019116	4	6	2	2	0	0	0	0	Gm31814	predicted gene, 31814 [Source:MGI Symbol;Acc:MGI:5590973]
ENSMUSG00000070533	12.61	45.93	-1.8707	0.0020261	0.019119	6	19	8	13	8	90	52	64	Wfdc8	WAP four-disulfide core domain 8 [Source:MGI Symbol;Acc:MGI:2685552]
ENSMUSG00000081274	8.03	22.21	-1.459	0.0020358	0.019197	5	3	11	11	16	33	29	22	Gm15727	predicted gene 15727 [Source:MGI Symbol;Acc:MGI:3783170]
ENSMUSG00000050232	7.72	21.65	-1.4905	0.0020609	0.019379	4	13	4	7	24	22	24	25	Cxcr3	chemokine (C-X-C motif) receptor 3 [Source:MGI Symbol;Acc:MGI:1277207]
ENSMUSG00000019906	9.52	22.14	-1.219	0.0020847	0.019585	8	9	11	7	18	27	26	28	Lin7a	lin-7 homolog A (C. elegans) [Source:MGI Symbol;Acc:MGI:2135609]
ENSMUSG00000112501	61.02	22.31	1.4586	0.0020933	0.01966	27	23	105	76	25	30	23	20	Gm33091	predicted gene, 33091 [Source:MGI Symbol;Acc:MGI:5592250]
ENSMUSG00000023122	3.6	14.87	-2.0685	0.0021034	0.019729	4	4	3	2	6	11	29	22	Sult1c2	sulfotransferase family, cytosolic, 1C, member 2 [Source:MGI Symbol;Acc:MGI:1916333]
ENSMUSG00000024066	17638.3	8756.42	1.0103	0.0021187	0.019845	12135	7746	27981	18236	8023	10344	8009	12517	Xdh	xanthine dehydrogenase [Source:MGI Symbol;Acc:MGI:98973]
ENSMUSG00000006462	21.36	7.3	1.5609	0.0021211	0.019858	9	30	24	16	8	5	10	9	A530013C23Rik	RIKEN cDNA A530013C23 gene [Source:MGI Symbol;Acc:MGI:3041178]
ENSMUSG00000086531	15.12	47.47	-1.6463	0.002128	0.019903	19	1	24	12	54	53	45	56	Gm11351	predicted gene 11351 [Source:MGI Symbol;Acc:MGI:3649797]
ENSMUSG00000027611	2537.81	859.74	1.562	0.0021431	0.020019	1002	775	3523	4253	1373	666	765	850	Procr	protein C receptor, endothelial [Source:MGI Symbol;Acc:MGI:104596]
ENSMUSG00000037259	14.26	33.09	-1.2099	0.0021477	0.020056	5	16	16	16	23	42	35	49	Dzank1	double zinc ribbon and ankyrin repeat domains 1 [Source:MGI Symbol;Acc:MGI:2139080]
ENSMUSG00000112842	2.7	12.08	-2.1466	0.0021705	0.020237	3	1	4	2	14	21	8	10	Gm30232	predicted gene, 30232 [Source:MGI Symbol;Acc:MGI:5589391]
ENSMUSG00000022876	284.61	136.65	1.0632	0.0021735	0.020252	205	198	394	261	222	117	107	134	Samsn1	SAM domain, SH3 domain and nuclear localization signals, 1 [Source:MGI Symbol;Acc:MGI:1914992]
ENSMUSG00000092284	11.26	1.07	3.3438	0.0021774	0.020281	26	5	2	6	0	1	2	2	Gm8801	predicted gene 8801 [Source:MGI Symbol;Acc:MGI:3779813]
ENSMUSG00000030209	2.23	14.29	-2.7075	0.0021834	0.020309	2	3	1	2	1	27	24	15	Grin2b	glutamate receptor, ionotropic, NMDA2B (epsilon 2) [Source:MGI Symbol;Acc:MGI:95821]
ENSMUSG00000024300	172.57	383.66	-1.15	0.0021844	0.020309	84	85	299	184	487	409	374	397	Myo1f	myosin IF [Source:MGI Symbol;Acc:MGI:107711]
ENSMUSG00000027316	98.09	354.94	-1.8569	0.0021864	0.020321	70	211	37	33	101	472	620	446	Gfra4	glial cell line derived neurotrophic factor family receptor alpha 4 [Source:MGI Symbol;Acc:MGI:1341873]
ENSMUSG00000106961	4.21	16.15	-1.9171	0.0021918	0.020358	1	2	7	6	10	18	15	30	Gm43128	predicted gene 43128 [Source:MGI Symbol;Acc:MGI:5663265]
ENSMUSG00000032688	1171.34	556.03	1.0754	0.0021916	0.020358	704	488	1713	1483	617	727	565	534	Malt1	MALT1 paracaspase [Source:MGI Symbol;Acc:MGI:2445027]
ENSMUSG00000032750	9.43	30.45	-1.669	0.0022112	0.020487	2	3	17	14	32	27	39	36	Gab3	growth factor receptor bound protein 2-associated protein 3 [Source:MGI Symbol;Acc:MGI:2387324]
ENSMUSG00000097134	44.68	8.38	2.4061	0.0022148	0.020501	111	9	15	20	5	14	5	14	1110002J07Rik	RIKEN cDNA 1110002J07 gene [Source:MGI Symbol;Acc:MGI:1915738]
ENSMUSG00000020335	4.64	15.93	-1.7862	0.0022232	0.020566	1	8	3	5	10	19	21	22	Zfp354b	zinc finger protein 354B [Source:MGI Symbol;Acc:MGI:1351476]
ENSMUSG00000052013	39.52	18.31	1.1239	0.0022401	0.020703	24	29	51	43	22	22	24	12	Btla	B and T lymphocyte associated [Source:MGI Symbol;Acc:MGI:2658978]
ENSMUSG00000054932	1260.07	6805.85	-2.4333	0.0022499	0.020777	780	1762	1064	1000	1436	2930	5347	21667	Afp	alpha fetoprotein [Source:MGI Symbol;Acc:MGI:87951]
ENSMUSG00000055733	9.32	24.6	-1.3786	0.0022702	0.020935	2	10	13	10	27	24	30	27	Nap1l3	nucleosome assembly protein 1-like 3 [Source:MGI Symbol;Acc:MGI:1859565]
ENSMUSG00000021414	5.18	16.65	-1.695	0.0022886	0.021079	4	7	6	2	8	23	23	22	Fam217a	family with sequence similarity 217, member A [Source:MGI Symbol;Acc:MGI:1919114]
ENSMUSG00000070564	17.68	6.63	1.4004	0.0022949	0.021123	14	18	20	13	4	7	9	10	Ntn5	netrin 5 [Source:MGI Symbol;Acc:MGI:2685330]
ENSMUSG00000105703	939.96	371.43	1.3386	0.0022995	0.021159	1474	663	820	416	162	665	374	502	Gm43305	predicted gene 43305 [Source:MGI Symbol;Acc:MGI:5663442]
ENSMUSG00000041165	12.88	2.55	2.2827	0.002347	0.021543	16	17	7	6	0	4	5	3	Spem1	sperm maturation 1 [Source:MGI Symbol;Acc:MGI:1921538]
ENSMUSG00000085433	10.6	29.2	-1.4519	0.0023532	0.02158	6	6	19	9	16	52	31	34	Gm16001	predicted gene 16001 [Source:MGI Symbol;Acc:MGI:3802119]
ENSMUSG00000026494	23.35	54.65	-1.2137	0.0023868	0.021861	16	11	43	18	61	70	64	45	Kif26b	kinesin family member 26B [Source:MGI Symbol;Acc:MGI:2447076]
ENSMUSG00000051180	0.81	7.96	-3.2892	0.0023865	0.021861	0	0	0	3	5	11	10	10	Olfr522	olfactory receptor 522 [Source:MGI Symbol;Acc:MGI:3030356]
ENSMUSG00000085505	17.82	6.07	1.5792	0.0024174	0.022086	17	10	14	24	9	5	6	6	Gm12868	predicted gene 12868 [Source:MGI Symbol;Acc:MGI:3651004]
ENSMUSG00000024697	124.02	41.1	1.5979	0.0024198	0.022101	54	33	166	213	53	28	45	52	Gna14	guanine nucleotide binding protein, alpha 14 [Source:MGI Symbol;Acc:MGI:95769]
ENSMUSG00000062778	21.68	2.96	2.8382	0.002424	0.022133	48	10	12	6	0	9	4	1	Chia1	chitinase, acidic 1 [Source:MGI Symbol;Acc:MGI:1932052]
ENSMUSG00000085354	1.66	9.53	-2.5323	0.0024299	0.022173	1	3	1	1	10	11	16	5	Gm2044	predicted gene 2044 [Source:MGI Symbol;Acc:MGI:3780212]
ENSMUSG00000047641	58.12	144.28	-1.3139	0.0024327	0.022192	54	71	37	48	124	134	312	73	Krt87	keratin 87 [Source:MGI Symbol;Acc:MGI:3665486]
ENSMUSG00000030562	179.43	462.89	-1.3664	0.0024351	0.022207	115	43	290	227	297	663	481	652	Nox4	NADPH oxidase 4 [Source:MGI Symbol;Acc:MGI:1354184]
ENSMUSG00000020926	18.34	42.37	-1.1947	0.0024391	0.022237	12	7	31	19	39	42	53	54	Adam11	a disintegrin and metallopeptidase domain 11 [Source:MGI Symbol;Acc:MGI:1098667]
ENSMUSG00000043419	11.63	29.51	-1.3427	0.0024478	0.022295	16	7	10	9	42	32	25	28	Rnf227	ring finger protein 227 [Source:MGI Symbol;Acc:MGI:1915359]
ENSMUSG00000067158	178.7	373.41	-1.0614	0.002457	0.022359	127	67	299	178	371	436	401	443	Col4a4	collagen, type IV, alpha 4 [Source:MGI Symbol;Acc:MGI:104687]
ENSMUSG00000024064	8.02	23.34	-1.5536	0.0024587	0.02236	7	10	5	7	16	19	48	22	Galnt14	polypeptide N-acetylgalactosaminyltransferase 14 [Source:MGI Symbol;Acc:MGI:1918935]
ENSMUSG00000030154	4.42	15.04	-1.7773	0.0024687	0.02243	2	6	1	7	13	17	19	18	Klrb1f	killer cell lectin-like receptor subfamily B member 1F [Source:MGI Symbol;Acc:MGI:2442965]
ENSMUSG00000020332	3.82	0	4.5183	0.0024893	0.02259	5	1	5	3	0	0	0	0	Meikin	meiotic kinetochore factor [Source:MGI Symbol;Acc:MGI:1922097]
ENSMUSG00000066366	4.69	17.55	-1.9119	0.0025003	0.022655	2	8	2	5	15	10	21	32	Serpina1a	serine (or cysteine) peptidase inhibitor, clade A, member 1A [Source:MGI Symbol;Acc:MGI:891971]
ENSMUSG00000026983	15	48.88	-1.7201	0.0025218	0.022808	28	11	9	5	18	84	65	58	Il1f5	interleukin 1 family, member 5 (delta) [Source:MGI Symbol;Acc:MGI:1859325]
ENSMUSG00000035778	2361.14	807.93	1.5476	0.0025325	0.022884	803	728	4011	3422	1234	672	732	812	Ggta1	glycoprotein galactosyltransferase alpha 1, 3 [Source:MGI Symbol;Acc:MGI:95704]
ENSMUSG00000086283	14.86	33.21	-1.1743	0.0025369	0.02291	14	17	13	10	18	42	52	39	2810433D01Rik	RIKEN cDNA 2810433D01 gene [Source:MGI Symbol;Acc:MGI:1924382]
ENSMUSG00000027224	106.38	321.6	-1.595	0.0025558	0.023045	106	13	185	94	312	395	256	461	Duoxa1	dual oxidase maturation factor 1 [Source:MGI Symbol;Acc:MGI:2384861]
ENSMUSG00000075420	91.13	217.96	-1.2559	0.0025702	0.023168	24	124	83	106	286	203	248	207	Smim6	small integral membrane protein 6 [Source:MGI Symbol;Acc:MGI:1915778]
ENSMUSG00000117234	23.28	8.9	1.3604	0.0025715	0.023172	25	19	25	16	3	14	14	10	Gm7818	predicted gene 7818 [Source:MGI Symbol;Acc:MGI:3643608]
ENSMUSG00000092131	0	3.94	-4.3014	0.0025923	0.023338	0	0	0	0	2	7	6	3	BC050972	cDNA sequence BC050972 [Source:MGI Symbol;Acc:MGI:3039596]
ENSMUSG00000019320	47.22	20.58	1.1941	0.0025991	0.023393	56	24	46	46	17	30	13	32	Noxo1	NADPH oxidase organizer 1 [Source:MGI Symbol;Acc:MGI:1919143]
ENSMUSG00000030203	1441.35	694.85	1.0527	0.0026052	0.023433	2203	726	1079	1165	794	724	851	674	Dusp16	dual specificity phosphatase 16 [Source:MGI Symbol;Acc:MGI:1917936]
ENSMUSG00000116657	11.47	3.09	1.8726	0.002626	0.023602	13	6	13	10	2	5	3	4	Gm49774	predicted gene, 49774 [Source:MGI Symbol;Acc:MGI:6215288]
ENSMUSG00000037846	8.25	21.14	-1.3735	0.0026279	0.023609	8	8	7	7	12	30	21	33	Rtkn2	rhotekin 2 [Source:MGI Symbol;Acc:MGI:2158417]
ENSMUSG00000079105	233.28	529.7	-1.1827	0.0026395	0.023691	220	194	382	70	454	702	705	503	C7	complement component 7 [Source:MGI Symbol;Acc:MGI:88235]
ENSMUSG00000037224	2.16	9.57	-2.1434	0.002675	0.023952	2	1	3	2	7	11	14	11	Zfyve28	zinc finger, FYVE domain containing 28 [Source:MGI Symbol;Acc:MGI:2684992]
ENSMUSG00000116903	1.73	10.66	-2.6811	0.0026868	0.024043	3	3	0	0	4	16	13	16	Gm19522	predicted gene, 19522 [Source:MGI Symbol;Acc:MGI:5011707]
ENSMUSG00000017002	2903.21	1363.64	1.0903	0.0026925	0.024072	4056	1136	2770	2559	1706	1356	1271	1596	Slpi	secretory leukocyte peptidase inhibitor [Source:MGI Symbol;Acc:MGI:109297]
ENSMUSG00000020695	2036.79	4114.09	-1.0141	0.0026971	0.024099	1536	823	3279	1988	3817	4453	4014	5968	Mrc2	mannose receptor, C type 2 [Source:MGI Symbol;Acc:MGI:107818]
ENSMUSG00000058914	293.12	663.34	-1.1794	0.0026995	0.024113	373	267	241	176	235	1008	783	1026	C1qtnf3	C1q and tumor necrosis factor related protein 3 [Source:MGI Symbol;Acc:MGI:1932136]
ENSMUSG00000047420	26.97	59.44	-1.1503	0.0027329	0.024374	31	33	19	14	39	62	67	100	Fam180a	family with sequence similarity 180, member A [Source:MGI Symbol;Acc:MGI:3039626]
ENSMUSG00000025017	1721.31	736.16	1.226	0.0027437	0.024449	1725	578	2371	1698	1153	697	669	619	Pik3ap1	phosphoinositide-3-kinase adaptor protein 1 [Source:MGI Symbol;Acc:MGI:1933177]
ENSMUSG00000075122	285.63	142.09	1.0065	0.0027522	0.024517	272	133	423	232	92	145	186	218	Cd80	CD80 antigen [Source:MGI Symbol;Acc:MGI:101775]
ENSMUSG00000026031	5414.16	2600.91	1.0578	0.0027623	0.024585	3174	2144	8007	6977	2555	3054	2580	3318	Cflar	CASP8 and FADD-like apoptosis regulator [Source:MGI Symbol;Acc:MGI:1336166]
ENSMUSG00000116283	12.1	2.18	2.4388	0.002775	0.024676	19	9	6	9	1	5	0	4	Gm49412	predicted gene, 49412 [Source:MGI Symbol;Acc:MGI:6155039]
ENSMUSG00000029092	34.46	15.52	1.1523	0.0027764	0.024679	43	31	24	26	18	20	18	12	D5Ertd615e	DNA segment, Chr 5, ERATO Doi 615, expressed [Source:MGI Symbol;Acc:MGI:1277236]
ENSMUSG00000097388	22.84	10.03	1.1985	0.0027807	0.024704	19	16	24	25	11	8	11	14	Gm3200	predicted pseudogene 3200 [Source:MGI Symbol;Acc:MGI:3781379]
ENSMUSG00000101279	8.75	1.54	2.4822	0.0027965	0.024807	10	5	10	7	1	4	0	2	Gm18342	predicted gene, 18342 [Source:MGI Symbol;Acc:MGI:5010527]
ENSMUSG00000020542	140.16	313.38	-1.1611	0.002818	0.024968	97	80	170	173	110	466	393	473	Myocd	myocardin [Source:MGI Symbol;Acc:MGI:2137495]
ENSMUSG00000113800	8.5	22.51	-1.4194	0.0028526	0.025237	7	9	7	8	10	30	38	25	2210039B01Rik	RIKEN cDNA 2210039B01 gene [Source:MGI Symbol;Acc:MGI:1920894]
ENSMUSG00000113535	1084.77	457.45	1.2458	0.0028754	0.025424	439	1942	662	908	488	686	414	429	AU015791	expressed sequence AU015791 [Source:MGI Symbol;Acc:MGI:2144938]
ENSMUSG00000048498	10.82	2.64	2.0945	0.0028782	0.02544	8	6	12	14	5	1	2	3	Cd300e	CD300E molecule [Source:MGI Symbol;Acc:MGI:2387602]
ENSMUSG00000041468	21.55	68.95	-1.6688	0.0028795	0.025442	1	25	39	17	68	78	89	70	Gpr12	G-protein coupled receptor 12 [Source:MGI Symbol;Acc:MGI:101909]
ENSMUSG00000073144	28.57	12.68	1.1604	0.0028801	0.025442	29	30	28	17	9	12	20	16	4930599N23Rik	RIKEN cDNA 4930599N23 gene [Source:MGI Symbol;Acc:MGI:1922629]
ENSMUSG00000070167	40.66	15.03	1.4234	0.0028895	0.02551	51	52	20	22	9	15	25	19	Snora57	small nucleolar RNA, H/ACA box 57 [Source:MGI Symbol;Acc:MGI:5455599]
ENSMUSG00000072763	13.75	33.37	-1.2889	0.0028999	0.025595	12	20	13	5	21	48	36	46	5430403G16Rik	RIKEN cDNA 5430403G16 gene [Source:MGI Symbol;Acc:MGI:1924450]
ENSMUSG00000104616	2.64	12.04	-2.157	0.0029062	0.025642	2	0	5	3	13	17	7	16	Gm6069	predicted gene 6069 [Source:MGI Symbol;Acc:MGI:3648422]
ENSMUSG00000032313	236.81	572.57	-1.2739	0.0029081	0.025652	80	402	215	174	307	916	728	657	Tmem266	transmembrane protein 266 [Source:MGI Symbol;Acc:MGI:2142980]
ENSMUSG00000024340	1.11	7.93	-2.8639	0.0029286	0.025794	2	0	1	1	5	15	10	6	Btnl2	butyrophilin-like 2 [Source:MGI Symbol;Acc:MGI:1859549]
ENSMUSG00000022938	20.52	5.51	1.8768	0.002938	0.025846	25	30	9	9	3	5	6	11	Fam3b	family with sequence similarity 3, member B [Source:MGI Symbol;Acc:MGI:1270150]
ENSMUSG00000045613	4.1	16.9	-2.0542	0.0029459	0.0259	2	3	2	8	5	25	18	30	Chrm2	cholinergic receptor, muscarinic 2, cardiac [Source:MGI Symbol;Acc:MGI:88397]
ENSMUSG00000096768	669.4	192.42	1.7989	0.002951	0.025937	147	477	194	1640	208	210	222	206	Gm47283	predicted gene, 47283 [Source:MGI Symbol;Acc:MGI:6096131]
ENSMUSG00000037548	5.97	19.27	-1.713	0.0029602	0.026002	11	4	2	4	23	15	24	22	H2-DMb2	histocompatibility 2, class II, locus Mb2 [Source:MGI Symbol;Acc:MGI:95923]
ENSMUSG00000026831	1.89	9.6	-2.3467	0.0029688	0.026063	1	2	2	2	4	14	9	17	1700007K13Rik	RIKEN cDNA 1700007K13 gene [Source:MGI Symbol;Acc:MGI:1916577]
ENSMUSG00000077737	25.33	11.17	1.1716	0.0029948	0.026252	24	28	21	19	9	15	17	9	Snord72	small nucleolar RNA, C/D box 72 [Source:MGI Symbol;Acc:MGI:3819555]
ENSMUSG00000108362	4.45	16.11	-1.8682	0.0030012	0.026299	5	3	2	6	17	22	7	25	Gm18561	predicted gene, 18561 [Source:MGI Symbol;Acc:MGI:5010746]
ENSMUSG00000032131	11.44	25.05	-1.1369	0.003002	0.026299	8	12	11	11	17	34	34	28	Abcg4	ATP binding cassette subfamily G member 4 [Source:MGI Symbol;Acc:MGI:1890594]
ENSMUSG00000047884	9.79	1.68	2.6003	0.0030039	0.0263	5	12	9	10	3	0	0	4	Klk9	kallikrein related-peptidase 9 [Source:MGI Symbol;Acc:MGI:1921082]
ENSMUSG00000097730	46.11	142.56	-1.6274	0.0030354	0.026529	5	83	48	35	104	179	222	136	Gm26588	predicted gene, 26588 [Source:MGI Symbol;Acc:MGI:5477082]
ENSMUSG00000106641	29.51	132.65	-2.1706	0.0030593	0.026683	12	68	19	8	14	186	214	205	Gm43534	predicted gene 43534 [Source:MGI Symbol;Acc:MGI:5663671]
ENSMUSG00000037942	76.59	194.67	-1.346	0.0031006	0.026991	94	18	116	55	117	262	216	287	Crp	C-reactive protein, pentraxin-related [Source:MGI Symbol;Acc:MGI:88512]
ENSMUSG00000024530	15.42	33.78	-1.126	0.003101	0.026991	12	12	19	14	31	40	24	55	Prelid3a	PRELI domain containing 3A [Source:MGI Symbol;Acc:MGI:2442865]
ENSMUSG00000065968	7.15	0.85	3.0232	0.0031041	0.02701	2	7	12	6	0	2	1	1	Ifitm7	interferon induced transmembrane protein 7 [Source:MGI Symbol;Acc:MGI:1921732]
ENSMUSG00000086593	8.53	1.7	2.2637	0.0031101	0.027054	8	9	7	7	0	3	3	2	Gm16548	predicted gene 16548 [Source:MGI Symbol;Acc:MGI:4414968]
ENSMUSG00000034159	29.19	82.83	-1.5088	0.0031424	0.027271	15	53	18	20	32	145	132	72	Mab21l4	mab-21-like 4 [Source:MGI Symbol;Acc:MGI:1919124]
ENSMUSG00000097145	8.13	20.35	-1.3213	0.003145	0.027285	4	9	8	9	17	31	18	25	9230114K14Rik	RIKEN cDNA 9230114K14 gene [Source:MGI Symbol;Acc:MGI:3041212]
ENSMUSG00000042750	5.73	23.88	-2.0647	0.0031575	0.027378	3	6	4	8	6	15	27	62	Bex2	brain expressed X-linked 2 [Source:MGI Symbol;Acc:MGI:1338017]
ENSMUSG00000030607	16.03	4.22	1.9076	0.0031662	0.027446	18	24	5	10	3	6	5	5	Acan	aggrecan [Source:MGI Symbol;Acc:MGI:99602]
ENSMUSG00000070868	0.52	6.97	-3.6685	0.0031712	0.027473	0	0	1	1	10	8	9	3	Skint3	selection and upkeep of intraepithelial T cells 3 [Source:MGI Symbol;Acc:MGI:3045331]
ENSMUSG00000095366	12.34	2.52	2.3048	0.0031712	0.027473	8	6	5	26	3	3	3	2	Gm21860	predicted gene, 21860 [Source:MGI Symbol;Acc:MGI:5434024]
ENSMUSG00000079138	20.61	4.09	2.373	0.0031882	0.02758	4	6	40	29	8	4	3	2	Gm8818	predicted pseudogene 8818 [Source:MGI Symbol;Acc:MGI:3645903]
ENSMUSG00000074194	20.31	47.97	-1.2434	0.0031891	0.02758	12	25	24	14	21	88	54	57	Zfp791	zinc finger protein 791 [Source:MGI Symbol;Acc:MGI:3648473]
ENSMUSG00000020178	335.09	140.5	1.2571	0.0032376	0.027933	189	143	543	386	219	130	102	148	Adora2a	adenosine A2a receptor [Source:MGI Symbol;Acc:MGI:99402]
ENSMUSG00000078591	9.49	2.09	2.2017	0.0032546	0.028071	12	11	6	5	3	2	2	2	Hs3st4	heparan sulfate (glucosamine) 3-O-sulfotransferase 4 [Source:MGI Symbol;Acc:MGI:1333792]
ENSMUSG00000093772	4.33	15.25	-1.8126	0.0032612	0.02812	6	0	7	3	13	18	15	22	4931403E22Rik	RIKEN cDNA 4931403E22 gene [Source:MGI Symbol;Acc:MGI:1918192]
ENSMUSG00000103067	86.11	31.92	1.4235	0.0032851	0.028299	123	98	42	43	14	39	58	35	Gm30414	predicted gene, 30414 [Source:MGI Symbol;Acc:MGI:5589573]
ENSMUSG00000042514	3.12	16.35	-2.423	0.0032867	0.028299	3	6	0	2	3	25	21	27	Klhl14	kelch-like 14 [Source:MGI Symbol;Acc:MGI:1921249]
ENSMUSG00000086754	7.05	1.18	2.6343	0.0032925	0.028341	5	7	8	6	2	2	1	0	Gm16098	predicted gene 16098 [Source:MGI Symbol;Acc:MGI:3801762]
ENSMUSG00000037095	7350.13	2382.49	1.6255	0.0032994	0.028392	6088	4804	7784	8373	5710	1215	1766	910	Lrg1	leucine-rich alpha-2-glycoprotein 1 [Source:MGI Symbol;Acc:MGI:1924155]
ENSMUSG00000091618	40.77	100.07	-1.2993	0.0033472	0.028727	22	69	24	33	54	168	149	85	H60c	histocompatibility 60c [Source:MGI Symbol;Acc:MGI:3774845]
ENSMUSG00000075023	8.1	1.06	2.8777	0.0033529	0.028744	10	2	13	5	0	2	2	1	Accsl	1-aminocyclopropane-1-carboxylate synthase (non-functional)-like [Source:MGI Symbol;Acc:MGI:3584519]
ENSMUSG00000055980	70.45	149.61	-1.088	0.0033635	0.028807	46	53	72	89	59	224	244	160	Irs1	insulin receptor substrate 1 [Source:MGI Symbol;Acc:MGI:99454]
ENSMUSG00000117432	9	1.97	2.1647	0.0033854	0.028964	5	12	8	8	1	4	2	2	Gm49967	predicted gene, 49967 [Source:MGI Symbol;Acc:MGI:6275233]
ENSMUSG00000046997	16.39	35.31	-1.1224	0.0033878	0.028976	15	23	9	12	25	49	42	43	Spsb4	splA/ryanodine receptor domain and SOCS box containing 4 [Source:MGI Symbol;Acc:MGI:2183445]
ENSMUSG00000104340	3.31	0	4.3102	0.003412	0.02915	4	3	3	2	0	0	0	0	Gm10522	predicted gene 10522 [Source:MGI Symbol;Acc:MGI:3642357]
ENSMUSG00000024617	19.54	40.53	-1.0394	0.0034815	0.0297	8	18	26	21	40	36	48	55	Camk2a	calcium/calmodulin-dependent protein kinase II alpha [Source:MGI Symbol;Acc:MGI:88256]
ENSMUSG00000024784	10.12	2.16	2.2739	0.0034929	0.029772	15	9	5	7	4	1	2	2	Gpha2	glycoprotein hormone alpha 2 [Source:MGI Symbol;Acc:MGI:2156541]
ENSMUSG00000062296	7.45	30.79	-2.0561	0.0035246	0.029999	2	16	3	6	7	58	44	34	Trank1	tetratricopeptide repeat and ankyrin repeat containing 1 [Source:MGI Symbol;Acc:MGI:1341834]
ENSMUSG00000058498	10	24.83	-1.3321	0.0035655	0.030301	10	11	5	10	13	31	40	29	Rnf207	ring finger protein 207 [Source:MGI Symbol;Acc:MGI:2684989]
ENSMUSG00000034023	21.26	45.54	-1.0929	0.0035665	0.030301	6	26	23	24	40	63	48	52	Fancd2	Fanconi anemia, complementation group D2 [Source:MGI Symbol;Acc:MGI:2448480]
ENSMUSG00000039457	2699.65	5889.24	-1.1254	0.0035707	0.030313	1146	4507	1980	2235	3470	8941	7110	7207	Ppl	periplakin [Source:MGI Symbol;Acc:MGI:1194898]
ENSMUSG00000054589	5.52	16.46	-1.5965	0.0036028	0.03055	6	6	5	3	8	17	27	23	Gm9949	predicted gene 9949 [Source:MGI Symbol;Acc:MGI:3647947]
ENSMUSG00000025270	411.39	169.19	1.2817	0.0036076	0.030573	174	265	243	832	136	201	244	176	Alas2	aminolevulinic acid synthase 2, erythroid [Source:MGI Symbol;Acc:MGI:87990]
ENSMUSG00000067276	73.46	155.56	-1.0865	0.0036075	0.030573	91	75	62	37	96	228	258	123	Capn6	calpain 6 [Source:MGI Symbol;Acc:MGI:1100850]
ENSMUSG00000044026	1123.38	2298.39	-1.0328	0.0036145	0.030614	469	1749	886	1013	1607	3119	3251	2380	Slc35g1	solute carrier family 35, member G1 [Source:MGI Symbol;Acc:MGI:2444789]
ENSMUSG00000022296	9.67	22.6	-1.242	0.0036484	0.030857	10	9	7	9	15	30	22	35	Baalc	brain and acute leukemia, cytoplasmic [Source:MGI Symbol;Acc:MGI:1928704]
ENSMUSG00000038115	9.24	30.52	-1.7097	0.0036936	0.031151	4	1	15	15	26	33	25	52	Ano2	anoctamin 2 [Source:MGI Symbol;Acc:MGI:2387214]
ENSMUSG00000065987	1.99	16.47	-3.0793	0.0037201	0.031338	4	1	1	1	3	4	11	58	Cd209b	CD209b antigen [Source:MGI Symbol;Acc:MGI:1916415]
ENSMUSG00000020774	16.93	40.07	-1.2561	0.0037415	0.031483	20	19	13	9	21	37	57	67	Aspa	aspartoacylase [Source:MGI Symbol;Acc:MGI:87914]
ENSMUSG00000090891	42.86	19.28	1.1592	0.0038112	0.031951	37	17	57	48	20	21	28	16	D6Ertd527e	DNA segment, Chr 6, ERATO Doi 527, expressed [Source:MGI Symbol;Acc:MGI:1261919]
ENSMUSG00000020279	3.31	14.67	-2.1393	0.0038492	0.032215	3	3	2	4	28	6	10	17	Il9r	interleukin 9 receptor [Source:MGI Symbol;Acc:MGI:96564]
ENSMUSG00000022235	17.92	45.08	-1.338	0.0038681	0.032327	22	18	19	6	30	43	41	89	Cmbl	carboxymethylenebutenolidase-like (Pseudomonas) [Source:MGI Symbol;Acc:MGI:1916824]
ENSMUSG00000112140	17.39	5.52	1.6763	0.0038721	0.032342	9	7	22	27	7	6	5	6	Gm5780	predicted gene 5780 [Source:MGI Symbol;Acc:MGI:3645288]
ENSMUSG00000109559	0.28	4.49	-3.7591	0.0038899	0.032455	0	1	0	0	4	7	5	4	Gm34280	predicted gene, 34280 [Source:MGI Symbol;Acc:MGI:5593439]
ENSMUSG00000043259	94.41	189.34	-1.0052	0.0039154	0.032649	63	147	90	45	138	237	219	257	Fam13c	family with sequence similarity 13, member C [Source:MGI Symbol;Acc:MGI:1918971]
ENSMUSG00000054320	71.71	23.05	1.6278	0.0039469	0.032874	122	61	28	42	9	40	41	16	Lrrc36	leucine rich repeat containing 36 [Source:MGI Symbol;Acc:MGI:2448585]
ENSMUSG00000005045	30.1	12.71	1.2426	0.0039539	0.032905	28	13	47	24	10	18	15	14	Chd5	chromodomain helicase DNA binding protein 5 [Source:MGI Symbol;Acc:MGI:3036258]
ENSMUSG00000040860	487.55	985.64	-1.0151	0.003958	0.032921	153	655	551	451	1011	1197	1132	1011	Crocc	ciliary rootlet coiled-coil, rootletin [Source:MGI Symbol;Acc:MGI:3529431]
ENSMUSG00000038179	787.3	293.85	1.4231	0.0039684	0.03298	413	242	1366	956	491	233	213	306	Slamf7	SLAM family member 7 [Source:MGI Symbol;Acc:MGI:1922595]
ENSMUSG00000026308	13.44	33.82	-1.3152	0.0040072	0.033264	11	6	19	14	49	23	31	42	Klhl30	kelch-like 30 [Source:MGI Symbol;Acc:MGI:1918038]
ENSMUSG00000109221	3.36	0	4.3239	0.0040254	0.033397	5	2	2	3	0	0	0	0	Gm9375	predicted gene 9375 [Source:MGI Symbol;Acc:MGI:3643024]
ENSMUSG00000118383	13.08	38.59	-1.5806	0.0040274	0.033404	25	10	6	5	19	51	54	52	Gm50321	predicted gene, 50321 [Source:MGI Symbol;Acc:MGI:6303181]
ENSMUSG00000036362	21.66	45.73	-1.0659	0.0040325	0.033418	15	13	34	19	49	45	38	69	P2ry13	purinergic receptor P2Y, G-protein coupled 13 [Source:MGI Symbol;Acc:MGI:1921441]
ENSMUSG00000087455	0.53	6.2	-3.5169	0.0040358	0.033427	0	1	1	0	4	7	11	6	5330411J11Rik	RIKEN cDNA 5330411J11 gene [Source:MGI Symbol;Acc:MGI:1923926]
ENSMUSG00000047767	456.38	1079.59	-1.2416	0.0040522	0.033554	291	146	695	580	1312	1036	724	1630	Atg16l2	autophagy related 16-like 2 (S. cerevisiae) [Source:MGI Symbol;Acc:MGI:1920933]
ENSMUSG00000100627	4.32	16.41	-1.9295	0.0040592	0.033601	3	5	6	2	4	27	16	29	A830008E24Rik	RIKEN cDNA A830008E24 gene [Source:MGI Symbol;Acc:MGI:3041183]
ENSMUSG00000028259	2.43	11.46	-2.2408	0.0040791	0.033735	1	4	3	1	3	18	13	19	Fhl5	four and a half LIM domains 5 [Source:MGI Symbol;Acc:MGI:1913192]
ENSMUSG00000045775	4.27	14.05	-1.6971	0.0040857	0.033765	1	5	6	4	14	13	12	23	Slc16a5	solute carrier family 16 (monocarboxylic acid transporters), member 5 [Source:MGI Symbol;Acc:MGI:2443515]
ENSMUSG00000064281	35.09	17.5	1.0045	0.0040993	0.033858	33	42	25	27	19	22	20	16	Rpl19-ps1	ribosomal protein L19, pseudogene 1 [Source:MGI Symbol;Acc:MGI:3642668]
ENSMUSG00000085604	44.89	22.26	1.0109	0.0041082	0.033922	24	38	57	48	16	25	21	38	Dhx58os	DEAH (Asp-Glu-Ala-His) box polypeptide 58, opposite strand [Source:MGI Symbol;Acc:MGI:3705104]
ENSMUSG00000013974	18.72	6.51	1.5422	0.0041358	0.034122	13	27	13	15	9	3	7	9	Mcemp1	mast cell expressed membrane protein 1 [Source:MGI Symbol;Acc:MGI:1916439]
ENSMUSG00000044646	435.47	186.09	1.2286	0.00414	0.034144	212	182	599	640	272	163	152	211	Zbtb7c	zinc finger and BTB domain containing 7C [Source:MGI Symbol;Acc:MGI:2443302]
[truncated: 134 more rows]

## Sheet: LPS-B_vs_PBS-B.DEG
gene_id	LPS-B_readcount	PBS-B_readcount	log2FoldChange	pvalue	padj	LPS-1-B	LPS-2-B	LPS-3-B	LPS-4-B	PBS-1-B	PBS-2-B	PBS-3-B	PBS-4-B	symbol	description
ENSMUSG00000028270	1977.97	39.43	5.6421	4.6619e-128	9.4575e-124	605	2517	849	2654	51	52	45	90	Gbp2	guanylate binding protein 2 [Source:MGI Symbol;Acc:MGI:102772]
ENSMUSG00000074896	1123.78	43.07	4.7193	1.26e-122	1.278e-118	442	1377	327	1897	56	64	69	61	Ifit3	interferon-induced protein with tetratricopeptide repeats 3 [Source:MGI Symbol;Acc:MGI:1101055]
ENSMUSG00000034459	1796.62	101.86	4.1417	2.2364e-98	1.5124e-94	712	1954	746	2320	141	148	149	155	Ifit1	interferon-induced protein with tetratricopeptide repeats 1 [Source:MGI Symbol;Acc:MGI:99450]
ENSMUSG00000027514	750.74	63.07	3.5759	1.8725e-96	9.4967e-93	303	1049	208	1148	79	69	97	134	Zbp1	Z-DNA binding protein 1 [Source:MGI Symbol;Acc:MGI:1927449]
ENSMUSG00000078920	879.19	118.89	2.8832	1.8519e-89	7.5137e-86	340	1123	291	1304	152	150	148	267	Ifi47	interferon gamma inducible protein 47 [Source:MGI Symbol;Acc:MGI:99448]
ENSMUSG00000046879	677.28	76.29	3.1572	9.9853e-87	3.3762e-83	271	863	192	1114	92	111	101	151	Irgm1	immunity-related GTPase family M member 1 [Source:MGI Symbol;Acc:MGI:107567]
ENSMUSG00000020638	1069.18	35.11	4.9353	5.6807e-86	1.6463e-82	337	1528	454	1243	58	46	44	56	Cmpk2	cytidine monophosphate (UMP-CMP) kinase 2, mitochondrial [Source:MGI Symbol;Acc:MGI:99830]
ENSMUSG00000026981	2287.47	39.28	5.8742	1.4675e-85	3.7214e-82	791	2590	589	4788	61	49	67	48	Il1rn	interleukin 1 receptor antagonist [Source:MGI Symbol;Acc:MGI:96547]
ENSMUSG00000105504	358.15	27.01	3.7315	9.1773e-83	2.0687e-79	130	455	115	578	34	35	36	57	Gbp5	guanylate binding protein 5 [Source:MGI Symbol;Acc:MGI:2429943]
ENSMUSG00000062488	414.91	6.56	5.986	6.8052e-82	1.3806e-78	143	473	144	707	10	5	11	13	Ifit3b	interferon-induced protein with tetratricopeptide repeats 3B [Source:MGI Symbol;Acc:MGI:3698419]
ENSMUSG00000016496	525.94	46.23	3.5261	2.2535e-76	4.156e-73	177	746	164	834	68	62	65	75	Cd274	CD274 antigen [Source:MGI Symbol;Acc:MGI:1926446]
ENSMUSG00000040253	465.7	67.02	2.7895	3.8781e-74	6.5563e-71	193	570	157	661	80	103	80	138	Gbp7	guanylate binding protein 7 [Source:MGI Symbol;Acc:MGI:2444421]
ENSMUSG00000027639	2904.58	838.97	1.7929	8.548e-71	1.3339e-67	1151	3738	945	4254	1151	1058	1199	1556	Samhd1	SAM domain and HD domain, 1 [Source:MGI Symbol;Acc:MGI:1927468]
ENSMUSG00000032484	2198.76	40.61	5.7663	2.6531e-65	3.8445e-62	639	2348	608	4987	54	55	77	47	Ngp	neutrophilic granule protein [Source:MGI Symbol;Acc:MGI:105983]
ENSMUSG00000026822	6851.84	89.81	6.2569	3.1971e-65	4.324e-62	2100	8140	1668	15265	161	76	166	110	Lcn2	lipocalin 2 [Source:MGI Symbol;Acc:MGI:96757]
ENSMUSG00000045932	1174.38	184.35	2.6759	7.1428e-61	9.0566e-58	508	1787	300	1633	242	226	264	367	Ifit2	interferon-induced protein with tetratricopeptide repeats 2 [Source:MGI Symbol;Acc:MGI:99449]
ENSMUSG00000030107	574.87	31.18	4.2023	1.7937e-58	2.1405e-55	182	599	270	792	42	41	48	52	Usp18	ubiquitin specific peptidase 18 [Source:MGI Symbol;Acc:MGI:1344364]
ENSMUSG00000073489	1047.98	44.78	4.5518	4.1128e-56	4.6354e-53	346	1056	284	2328	48	63	74	81	Ifi204	interferon activated gene 204 [Source:MGI Symbol;Acc:MGI:96429]
ENSMUSG00000022906	351.24	66.64	2.3956	1.8929e-55	2.0212e-52	144	462	109	510	81	84	89	148	Parp9	poly (ADP-ribose) polymerase family, member 9 [Source:MGI Symbol;Acc:MGI:1933117]
ENSMUSG00000020407	376.1	3.02	6.9642	5.7792e-52	5.8621e-49	143	396	98	770	5	0	7	6	Upp1	uridine phosphorylase 1 [Source:MGI Symbol;Acc:MGI:1097668]
ENSMUSG00000052270	447.54	38.08	3.5658	4.6505e-48	4.4926e-45	133	536	141	869	48	54	55	68	Fpr2	formyl peptide receptor 2 [Source:MGI Symbol;Acc:MGI:1278319]
ENSMUSG00000038507	326.17	18.67	4.1269	4.0717e-46	3.7546e-43	111	320	109	634	26	26	19	41	Parp12	poly (ADP-ribose) polymerase family, member 12 [Source:MGI Symbol;Acc:MGI:2143990]
ENSMUSG00000032690	658.29	66.71	3.31	4.2864e-46	3.7808e-43	270	744	173	1220	106	73	88	127	Oas2	2'-5' oligoadenylate synthetase 2 [Source:MGI Symbol;Acc:MGI:2180852]
ENSMUSG00000000204	11881.7	348.45	5.0928	1.3104e-44	1.1077e-41	4555	13004	2764	25098	654	323	620	375	Slfn4	schlafen 4 [Source:MGI Symbol;Acc:MGI:1329010]
ENSMUSG00000051748	208.54	12.99	4.0518	6.421e-44	5.2105e-41	79	293	54	351	24	15	19	16	Wfdc21	WAP four-disulfide core domain 21 [Source:MGI Symbol;Acc:MGI:1913357]
ENSMUSG00000029561	1542.05	175.14	3.1401	4.1739e-43	3.2568e-40	526	1643	599	2495	294	231	215	276	Oasl2	2'-5' oligoadenylate synthetase-like 2 [Source:MGI Symbol;Acc:MGI:1344390]
ENSMUSG00000002307	484.29	68.61	2.8158	2.78e-42	2.0888e-39	180	498	174	813	86	76	108	141	Daxx	Fas death domain-associated protein [Source:MGI Symbol;Acc:MGI:1197015]
ENSMUSG00000059089	377.7	27.46	3.7886	4.2945e-41	3.1115e-38	130	422	103	774	26	37	50	51	Fcgr4	Fc receptor, IgG, low affinity IV [Source:MGI Symbol;Acc:MGI:2179523]
ENSMUSG00000082292	211.94	23.82	3.1715	5.3892e-40	3.77e-37	102	320	50	280	29	39	32	40	Gm12250	predicted gene 12250 [Source:MGI Symbol;Acc:MGI:3649299]
ENSMUSG00000032661	986.34	100.64	3.2985	5.823e-40	3.9052e-37	379	1048	341	1635	177	141	127	130	Oas3	2'-5' oligoadenylate synthetase 3 [Source:MGI Symbol;Acc:MGI:2180850]
ENSMUSG00000063268	311.62	48.52	2.6858	5.9674e-40	3.9052e-37	120	346	100	533	61	73	56	100	Parp10	poly (ADP-ribose) polymerase family, member 10 [Source:MGI Symbol;Acc:MGI:3712326]
ENSMUSG00000040033	578.06	82.1	2.8223	9.4191e-39	5.9714e-36	190	661	183	1090	102	128	102	155	Stat2	signal transducer and activator of transcription 2 [Source:MGI Symbol;Acc:MGI:103039]
ENSMUSG00000050565	501.28	99.96	2.3176	1.2268e-38	7.5421e-36	184	662	205	586	123	144	148	175	Tor1aip2	torsin A interacting protein 2 [Source:MGI Symbol;Acc:MGI:3582695]
ENSMUSG00000054072	225.32	11.95	4.2496	1.9731e-38	1.1773e-35	97	296	48	406	8	23	20	20	Iigp1	interferon inducible GTPase 1 [Source:MGI Symbol;Acc:MGI:1926259]
ENSMUSG00000053846	622.66	0.92	9.5138	4.2919e-38	2.4877e-35	229	528	157	1460	1	2	2	0	Lipg	lipase, endothelial [Source:MGI Symbol;Acc:MGI:1341803]
ENSMUSG00000052776	445.42	32.1	3.7879	1.0126e-37	5.7063e-35	138	374	192	794	41	42	40	70	Oas1a	2'-5' oligoadenylate synthetase 1A [Source:MGI Symbol;Acc:MGI:2180860]
ENSMUSG00000041827	545.64	29.19	4.2335	5.0028e-37	2.743e-34	185	466	204	1044	35	47	54	31	Oasl1	2'-5' oligoadenylate synthetase-like 1 [Source:MGI Symbol;Acc:MGI:2180849]
ENSMUSG00000030203	438.36	51.75	3.0926	1.4016e-36	7.4827e-34	180	535	106	809	54	69	96	87	Dusp16	dual specificity phosphatase 16 [Source:MGI Symbol;Acc:MGI:1917936]
ENSMUSG00000033213	187	2.54	6.2939	2.6611e-36	1.3842e-33	68	216	45	389	4	3	6	1	AA467197	expressed sequence AA467197 [Source:MGI Symbol;Acc:MGI:3034182]
ENSMUSG00000022026	132.63	4.31	5.0209	8.7523e-36	4.4389e-33	50	148	39	245	9	7	4	4	Olfm4	olfactomedin 4 [Source:MGI Symbol;Acc:MGI:2685142]
ENSMUSG00000026896	472.68	34.64	3.7669	2.3683e-35	1.1718e-32	143	410	222	762	41	43	63	57	Ifih1	interferon induced with helicase C domain 1 [Source:MGI Symbol;Acc:MGI:1918836]
ENSMUSG00000036053	154.67	2.57	5.9437	1.3348e-34	6.4473e-32	53	156	47	315	6	1	3	5	Fmnl2	formin-like 2 [Source:MGI Symbol;Acc:MGI:1918659]
ENSMUSG00000034855	226.3	1.5	7.3729	4.322e-34	2.0391e-31	63	262	67	482	3	3	2	0	Cxcl10	chemokine (C-X-C motif) ligand 10 [Source:MGI Symbol;Acc:MGI:1352450]
ENSMUSG00000047945	432.6	26.34	4.0536	1.422e-33	6.5563e-31	196	511	99	778	39	28	56	27	Marcksl1	MARCKS-like 1 [Source:MGI Symbol;Acc:MGI:97143]
ENSMUSG00000029798	422.44	36.1	3.5555	2.6289e-33	1.1852e-30	155	360	130	889	51	42	58	61	Herc6	hect domain and RLD 6 [Source:MGI Symbol;Acc:MGI:1914388]
ENSMUSG00000024953	804.66	155.04	2.3845	4.2898e-33	1.8919e-30	280	1060	221	1460	178	231	246	258	Prdx5	peroxiredoxin 5 [Source:MGI Symbol;Acc:MGI:1859821]
ENSMUSG00000027366	797.05	151.58	2.4016	5.53e-33	2.3869e-30	299	889	229	1501	207	218	207	258	Sppl2a	signal peptide peptidase like 2A [Source:MGI Symbol;Acc:MGI:1913802]
ENSMUSG00000032496	703.72	24.67	4.8437	1.0084e-32	4.2621e-30	200	652	178	1789	48	20	35	40	Ltf	lactotransferrin [Source:MGI Symbol;Acc:MGI:96837]
ENSMUSG00000030921	1088.85	218.9	2.3183	2.6492e-32	1.0968e-29	474	1323	288	1818	344	248	282	420	Trim30a	tripartite motif-containing 30A [Source:MGI Symbol;Acc:MGI:98178]
ENSMUSG00000033355	440.25	64.42	2.7828	2.8049e-32	1.1381e-29	158	480	144	790	101	77	101	94	Rtp4	receptor transporter protein 4 [Source:MGI Symbol;Acc:MGI:1915025]
ENSMUSG00000003541	110.59	4.16	4.7808	1.2684e-31	5.0453e-29	41	117	31	220	7	5	6	6	Ier3	immediate early response 3 [Source:MGI Symbol;Acc:MGI:104814]
ENSMUSG00000028268	215.87	31.53	2.7868	4.3737e-31	1.7063e-28	60	319	74	343	44	38	39	68	Gbp3	guanylate binding protein 3 [Source:MGI Symbol;Acc:MGI:1926263]
ENSMUSG00000062421	179.39	22.59	3.001	3.9545e-30	1.5137e-27	64	220	48	343	23	31	32	51	Arf2	ADP-ribosylation factor 2 [Source:MGI Symbol;Acc:MGI:99595]
ENSMUSG00000030474	513.7	52.16	3.312	2.0605e-29	7.7408e-27	191	710	111	984	95	53	64	93	Siglece	sialic acid binding Ig-like lectin E [Source:MGI Symbol;Acc:MGI:1932475]
ENSMUSG00000042726	859.59	143.06	2.5872	2.2518e-29	8.306e-27	278	878	353	1401	183	219	219	212	Trafd1	TRAF type zinc finger domain containing 1 [Source:MGI Symbol;Acc:MGI:1923551]
ENSMUSG00000064246	520.45	42.15	3.637	4.5549e-29	1.6501e-26	173	631	136	1060	68	35	81	60	Chil1	chitinase-like 1 [Source:MGI Symbol;Acc:MGI:1340899]
ENSMUSG00000020572	473.39	60.19	2.9902	6.9676e-29	2.4799e-26	155	578	126	958	97	78	85	88	Nampt	nicotinamide phosphoribosyltransferase [Source:MGI Symbol;Acc:MGI:1929865]
ENSMUSG00000021591	266.52	23.17	3.5432	7.4909e-29	2.6201e-26	102	271	71	547	43	23	32	36	Glrx	glutaredoxin [Source:MGI Symbol;Acc:MGI:2135625]
ENSMUSG00000020089	97.28	7	3.758	7.7031e-29	2.6487e-26	31	111	45	126	7	10	11	14	Ppa1	pyrophosphatase (inorganic) 1 [Source:MGI Symbol;Acc:MGI:97831]
ENSMUSG00000030447	241.73	37.8	2.6984	1.4486e-28	4.898e-26	107	302	52	440	51	53	51	68	Cyfip1	cytoplasmic FMR1 interacting protein 1 [Source:MGI Symbol;Acc:MGI:1338801]
ENSMUSG00000091649	161.21	29.83	2.4435	1.5234e-28	5.0663e-26	56	213	52	259	27	47	46	59	Phf11b	PHD finger protein 11B [Source:MGI Symbol;Acc:MGI:3645789]
ENSMUSG00000045551	323.43	24.23	3.7633	1.8507e-28	6.0558e-26	91	444	80	679	38	33	40	27	Fpr1	formyl peptide receptor 1 [Source:MGI Symbol;Acc:MGI:107443]
ENSMUSG00000040483	350.83	48.16	2.869	2.4057e-28	7.7466e-26	113	365	146	558	71	73	70	63	Xaf1	XIAP associated factor 1 [Source:MGI Symbol;Acc:MGI:3772572]
ENSMUSG00000059108	398.73	55.01	2.8709	4.0727e-28	1.291e-25	137	479	109	781	61	82	99	79	Ifitm6	interferon induced transmembrane protein 6 [Source:MGI Symbol;Acc:MGI:2686976]
ENSMUSG00000032011	14.18	174.86	-3.5681	4.9027e-28	1.5302e-25	4	16	5	27	173	207	263	428	Thy1	thymus cell antigen 1, theta [Source:MGI Symbol;Acc:MGI:98747]
ENSMUSG00000015947	242.39	15.23	4.0036	4.9954e-28	1.5355e-25	64	225	77	565	16	24	24	26	Fcgr1	Fc receptor, IgG, high affinity I [Source:MGI Symbol;Acc:MGI:95498]
ENSMUSG00000056515	264.72	43.16	2.624	5.7905e-28	1.7533e-25	106	279	77	489	55	46	73	83	Rab31	RAB31, member RAS oncogene family [Source:MGI Symbol;Acc:MGI:1914603]
ENSMUSG00000039501	334.28	79.23	2.0859	5.9835e-28	1.7851e-25	147	366	94	572	108	109	109	141	Znfx1	zinc finger, NFX1-type containing 1 [Source:MGI Symbol;Acc:MGI:2138982]
ENSMUSG00000046718	194.5	26.43	2.8982	1.2683e-27	3.7291e-25	63	223	67	346	33	38	47	35	Bst2	bone marrow stromal cell antigen 2 [Source:MGI Symbol;Acc:MGI:1916800]
ENSMUSG00000026536	183.71	8.37	4.4405	1.8963e-27	5.4959e-25	71	146	49	418	8	8	13	23	Ifi211	interferon activated gene 211 [Source:MGI Symbol;Acc:MGI:3041120]
ENSMUSG00000023903	191.32	14.86	3.7209	1.9954e-27	5.7015e-25	77	241	41	373	27	14	25	19	Mmp25	matrix metallopeptidase 25 [Source:MGI Symbol;Acc:MGI:2443938]
ENSMUSG00000017830	252.37	28.89	3.1443	2.4992e-27	7.0418e-25	82	256	85	492	42	45	42	37	Dhx58	DEXH (Asp-Glu-X-His) box polypeptide 58 [Source:MGI Symbol;Acc:MGI:1931560]
ENSMUSG00000034422	937.56	143.44	2.7056	2.7791e-27	7.7233e-25	424	1136	281	1373	203	147	142	389	Parp14	poly (ADP-ribose) polymerase family, member 14 [Source:MGI Symbol;Acc:MGI:1919489]
ENSMUSG00000040296	518.35	109.86	2.2452	3.9913e-27	1.0942e-24	230	631	133	867	172	121	142	216	Ddx58	DEAD/H box helicase 58 [Source:MGI Symbol;Acc:MGI:2442858]
ENSMUSG00000060519	173.03	31.82	2.4339	4.1765e-27	1.1297e-24	51	230	72	238	35	46	47	62	Tor3a	torsin family 3, member A [Source:MGI Symbol;Acc:MGI:1353652]
ENSMUSG00000078853	1052.76	173.04	2.6043	5.0936e-27	1.3596e-24	439	1682	384	940	228	287	214	284	Igtp	interferon gamma induced GTPase [Source:MGI Symbol;Acc:MGI:107729]
ENSMUSG00000054404	946.93	165.13	2.5174	9.2235e-27	2.4301e-24	554	1087	226	1271	209	201	214	373	Slfn5	schlafen 5 [Source:MGI Symbol;Acc:MGI:1329004]
ENSMUSG00000038357	164.24	5.08	5.0572	1.2926e-26	3.362e-24	41	159	44	419	8	7	8	6	Camp	cathelicidin antimicrobial peptide [Source:MGI Symbol;Acc:MGI:108443]
ENSMUSG00000033538	184.53	22.11	3.0705	1.4634e-26	3.758e-24	71	241	46	334	29	17	37	51	Casp4	caspase 4, apoptosis-related cysteine peptidase [Source:MGI Symbol;Acc:MGI:107700]
ENSMUSG00000026073	852.9	72.21	3.5686	1.5336e-26	3.889e-24	307	884	219	1834	97	86	150	81	Il1r2	interleukin 1 receptor, type II [Source:MGI Symbol;Acc:MGI:96546]
ENSMUSG00000059498	481.7	85.27	2.5092	1.682e-26	4.2126e-24	177	564	124	953	119	99	133	152	Fcgr3	Fc receptor, IgG, low affinity III [Source:MGI Symbol;Acc:MGI:95500]
ENSMUSG00000052684	149.85	14.69	3.3768	1.7735e-26	4.3877e-24	48	195	35	315	17	20	21	30	Jun	jun proto-oncogene [Source:MGI Symbol;Acc:MGI:96646]
ENSMUSG00000024164	790.18	96.75	3.0384	1.8922e-26	4.6251e-24	250	1022	190	1655	124	173	123	142	C3	complement component 3 [Source:MGI Symbol;Acc:MGI:88227]
ENSMUSG00000040328	135.65	5.08	4.6945	5.3848e-26	1.3005e-23	32	129	61	249	3	7	7	15	Olfr56	olfactory receptor 56 [Source:MGI Symbol;Acc:MGI:1333785]
ENSMUSG00000056529	229.71	33.86	2.787	6.6608e-26	1.5897e-23	83	300	58	431	55	49	35	59	Ptafr	platelet-activating factor receptor [Source:MGI Symbol;Acc:MGI:106066]
ENSMUSG00000031825	212.91	23.9	3.1599	1.9449e-25	4.588e-23	83	244	68	354	45	16	30	51	Crispld2	cysteine-rich secretory protein LCCL domain containing 2 [Source:MGI Symbol;Acc:MGI:1926142]
ENSMUSG00000054676	327.8	63.78	2.3756	2.8839e-25	6.7247e-23	137	454	70	579	74	88	84	138	1600014C10Rik	RIKEN cDNA 1600014C10 gene [Source:MGI Symbol;Acc:MGI:1919494]
ENSMUSG00000054855	99.79	5.11	4.3159	2.1539e-24	4.9655e-22	43	110	22	199	4	6	13	7	Rnd1	Rho family GTPase 1 [Source:MGI Symbol;Acc:MGI:2444878]
ENSMUSG00000033066	204.19	29.7	2.8019	6.6316e-24	1.5116e-21	69	228	58	413	33	49	46	46	Gas7	growth arrest specific 7 [Source:MGI Symbol;Acc:MGI:1202388]
ENSMUSG00000031722	1600.68	224.31	2.8393	7.283e-24	1.6417e-21	502	1945	412	3385	336	285	370	303	Hp	haptoglobin [Source:MGI Symbol;Acc:MGI:96211]
ENSMUSG00000078921	745.49	85.87	3.1131	1.0001e-23	2.2295e-21	232	997	388	643	129	111	100	169	Tgtp2	T cell specific GTPase 2 [Source:MGI Symbol;Acc:MGI:3710083]
ENSMUSG00000005413	327.65	20.92	3.9817	1.2807e-23	2.8241e-21	86	347	67	879	26	32	27	39	Hmox1	heme oxygenase 1 [Source:MGI Symbol;Acc:MGI:96163]
ENSMUSG00000000386	208.24	30.58	2.7837	1.4219e-23	3.1018e-21	103	228	54	337	41	50	49	35	Mx1	MX dynamin-like GTPase 1 [Source:MGI Symbol;Acc:MGI:97243]
ENSMUSG00000079597	138.23	10.15	3.813	1.5023e-23	3.2423e-21	57	146	41	246	21	14	14	7	Cstdc4	cystatin domain containing 4 [Source:MGI Symbol;Acc:MGI:3645124]
ENSMUSG00000049502	466.83	90.1	2.361	1.5497e-23	3.3093e-21	204	589	169	558	108	98	102	249	Dtx3l	deltex 3-like, E3 ubiquitin ligase [Source:MGI Symbol;Acc:MGI:2656973]
ENSMUSG00000015312	150.24	15.08	3.3505	1.7246e-23	3.6444e-21	54	207	28	314	17	24	22	26	Gadd45b	growth arrest and DNA-damage-inducible 45 beta [Source:MGI Symbol;Acc:MGI:107776]
ENSMUSG00000024308	756.14	178.34	2.0858	2.2893e-23	4.788e-21	219	874	290	1299	242	227	257	329	Tapbp	TAP binding protein [Source:MGI Symbol;Acc:MGI:1201689]
ENSMUSG00000051439	663.04	25.24	4.7243	2.7142e-23	5.6188e-21	161	795	154	1645	18	55	50	21	Cd14	CD14 antigen [Source:MGI Symbol;Acc:MGI:88318]
ENSMUSG00000025743	130.48	24.06	2.4477	3.068e-23	6.287e-21	47	153	42	225	22	35	41	46	Sdc3	syndecan 3 [Source:MGI Symbol;Acc:MGI:1349163]
ENSMUSG00000020227	247.68	30.12	3.0634	3.6207e-23	7.3454e-21	78	323	54	541	45	37	42	53	Irak3	interleukin-1 receptor-associated kinase 3 [Source:MGI Symbol;Acc:MGI:1921164]
ENSMUSG00000017756	26.13	136.3	-2.3715	5.047e-23	1.0137e-20	8	41	10	32	186	187	169	268	Slc12a7	solute carrier family 12, member 7 [Source:MGI Symbol;Acc:MGI:1342283]
ENSMUSG00000049401	369.6	83.48	2.1391	1.5143e-22	3.0118e-20	123	373	157	573	98	116	132	148	Ogfr	opioid growth factor receptor [Source:MGI Symbol;Acc:MGI:1919325]
ENSMUSG00000066861	126.49	6.69	4.2623	2.5022e-22	4.9284e-20	35	98	43	298	8	11	10	10	Oas1g	2'-5' oligoadenylate synthetase 1G [Source:MGI Symbol;Acc:MGI:97429]
ENSMUSG00000024659	430.03	105.42	2.0352	2.8405e-22	5.5409e-20	145	497	134	802	139	123	147	223	Anxa1	annexin A1 [Source:MGI Symbol;Acc:MGI:96819]
ENSMUSG00000059714	197.18	53.47	1.8882	4.2318e-22	8.1762e-20	69	228	71	318	76	66	78	95	Flot1	flotillin 1 [Source:MGI Symbol;Acc:MGI:1100500]
ENSMUSG00000026193	72.65	365.42	-2.3026	6.0325e-22	1.1545e-19	29	105	20	109	421	682	409	644	Fn1	fibronectin 1 [Source:MGI Symbol;Acc:MGI:95566]
ENSMUSG00000040026	1289.45	0.18	12.607	6.2652e-22	1.1879e-19	200	1153	242	4251	0	1	0	0	Saa3	serum amyloid A 3 [Source:MGI Symbol;Acc:MGI:98223]
ENSMUSG00000029915	104.91	11.46	3.228	1.2045e-21	2.2625e-19	33	150	32	176	24	11	10	22	Clec5a	C-type lectin domain family 5, member a [Source:MGI Symbol;Acc:MGI:1345151]
ENSMUSG00000070031	165.55	40.5	2.0411	1.2992e-21	2.418e-19	53	210	61	258	46	66	60	66	Sp140	Sp140 nuclear body protein [Source:MGI Symbol;Acc:MGI:3702467]
ENSMUSG00000001123	960.41	123.94	2.9525	1.7908e-21	3.3027e-19	251	851	492	1488	176	176	178	192	Lgals9	lectin, galactose binding, soluble 9 [Source:MGI Symbol;Acc:MGI:109496]
ENSMUSG00000025044	173.97	15.99	3.4542	2.048e-21	3.743e-19	54	220	37	394	18	23	16	41	Msr1	macrophage scavenger receptor 1 [Source:MGI Symbol;Acc:MGI:98257]
ENSMUSG00000025492	1901.24	281.22	2.7573	2.0725e-21	3.7541e-19	531	1806	851	3228	338	480	428	384	Ifitm3	interferon induced transmembrane protein 3 [Source:MGI Symbol;Acc:MGI:1913391]
ENSMUSG00000024079	237.86	50.91	2.2241	2.7924e-21	5.0132e-19	131	279	56	344	70	70	58	106	Eif2ak2	eukaryotic translation initiation factor 2-alpha kinase 2 [Source:MGI Symbol;Acc:MGI:1353449]
ENSMUSG00000033684	568.67	151.58	1.9192	2.8695e-21	5.1064e-19	199	749	149	1059	180	234	204	281	Qsox1	quiescin Q6 sulfhydryl oxidase 1 [Source:MGI Symbol;Acc:MGI:1330818]
ENSMUSG00000028480	373.41	150.16	1.3278	4.5776e-21	8.0753e-19	136	488	117	599	190	200	211	293	Glipr2	GLI pathogenesis-related 2 [Source:MGI Symbol;Acc:MGI:1917770]
ENSMUSG00000029484	81.1	4.52	4.1614	5.9662e-21	1.0434e-18	34	96	16	166	3	9	4	12	Anxa3	annexin A3 [Source:MGI Symbol;Acc:MGI:1201378]
ENSMUSG00000073008	17.42	97.32	-2.4964	6.6143e-21	1.1469e-18	7	25	6	21	133	128	142	170	Gpr174	G protein-coupled receptor 174 [Source:MGI Symbol;Acc:MGI:2685222]
ENSMUSG00000049988	273.54	32.34	3.0962	1.1882e-20	2.0428e-18	93	255	81	591	49	42	56	38	Lrrc25	leucine rich repeat containing 25 [Source:MGI Symbol;Acc:MGI:2445284]
ENSMUSG00000023341	69.57	8.95	3.0039	1.3055e-20	2.2255e-18	20	109	24	101	14	13	11	14	Mx2	MX dynamin-like GTPase 2 [Source:MGI Symbol;Acc:MGI:97244]
ENSMUSG00000069662	654.11	99.81	2.7196	1.7428e-20	2.9464e-18	186	753	177	1456	139	109	166	174	Marcks	myristoylated alanine rich protein kinase C substrate [Source:MGI Symbol;Acc:MGI:96907]
ENSMUSG00000052212	303.76	34.87	3.1422	1.8414e-20	3.0873e-18	98	338	68	710	57	45	50	49	Cd177	CD177 antigen [Source:MGI Symbol;Acc:MGI:1916141]
ENSMUSG00000054203	102.48	3.7	4.812	1.9104e-20	3.1768e-18	22	98	30	264	4	7	4	7	Ifi205	interferon activated gene 205 [Source:MGI Symbol;Acc:MGI:101847]
ENSMUSG00000001156	2170.7	364.16	2.5775	1.9854e-20	3.2746e-18	734	2358	669	4234	506	470	680	435	Mxd1	MAX dimerization protein 1 [Source:MGI Symbol;Acc:MGI:96908]
ENSMUSG00000022892	449.11	83.53	2.4385	2.4066e-20	3.9374e-18	152	523	117	930	120	95	138	136	App	amyloid beta (A4) precursor protein [Source:MGI Symbol;Acc:MGI:88059]
ENSMUSG00000035513	158.12	18.37	3.1418	2.494e-20	4.0476e-18	44	198	44	333	29	24	30	22	Ntng2	netrin G2 [Source:MGI Symbol;Acc:MGI:2159341]
ENSMUSG00000043939	147.17	20.82	2.8459	2.9969e-20	4.8252e-18	53	164	49	256	29	35	34	20	A530064D06Rik	RIKEN cDNA A530064D06 gene [Source:MGI Symbol;Acc:MGI:2443476]
ENSMUSG00000010358	148.24	22.72	2.6798	3.2159e-20	5.1372e-18	42	161	68	221	22	29	33	55	Ifi35	interferon-induced protein 35 [Source:MGI Symbol;Acc:MGI:1917360]
ENSMUSG00000078763	641.32	231.48	1.4812	3.3262e-20	5.2718e-18	260	875	171	1028	336	285	321	424	Slfn1	schlafen 1 [Source:MGI Symbol;Acc:MGI:1313259]
ENSMUSG00000022126	514.61	23.93	4.4404	5.5024e-20	8.6532e-18	122	634	129	1228	32	38	51	12	Acod1	aconitate decarboxylase 1 [Source:MGI Symbol;Acc:MGI:103206]
ENSMUSG00000069874	303.46	57.55	2.3971	5.8833e-20	9.1811e-18	153	508	73	318	61	79	75	135	Irgm2	immunity-related GTPase family M member 2 [Source:MGI Symbol;Acc:MGI:1926262]
ENSMUSG00000023274	17.27	125.81	-2.7201	6.0438e-20	9.3596e-18	5	33	4	27	130	167	179	288	Cd4	CD4 antigen [Source:MGI Symbol;Acc:MGI:88335]
ENSMUSG00000053617	10.36	85.36	-2.9933	9.807e-20	1.5072e-17	4	20	3	10	110	122	125	145	Sh3pxd2a	SH3 and PX domains 2A [Source:MGI Symbol;Acc:MGI:1298393]
ENSMUSG00000079339	325.33	46.65	2.7815	1.4689e-19	2.2405e-17	119	345	168	322	55	62	51	117	Ifit1bl1	interferon induced protein with tetratricpeptide repeats 1B like 1 [Source:MGI Symbol;Acc:MGI:3650685]
ENSMUSG00000056054	4672.84	793.53	2.5592	1.588e-19	2.4042e-17	1706	6140	1176	8684	1228	929	1453	928	S100a8	S100 calcium binding protein A8 (calgranulin A) [Source:MGI Symbol;Acc:MGI:88244]
ENSMUSG00000026104	315.8	87.66	1.8608	2.2822e-19	3.4296e-17	95	517	103	446	103	136	110	174	Stat1	signal transducer and activator of transcription 1 [Source:MGI Symbol;Acc:MGI:103063]
ENSMUSG00000020077	3408.07	1516.07	1.171	2.7317e-19	4.0748e-17	1274	4566	1021	5437	1838	2286	2190	2627	Srgn	serglycin [Source:MGI Symbol;Acc:MGI:97756]
ENSMUSG00000040552	63.19	4.93	3.7341	3.1845e-19	4.7156e-17	18	83	17	130	5	9	7	8	C3ar1	complement component 3a receptor 1 [Source:MGI Symbol;Acc:MGI:1097680]
ENSMUSG00000029322	857.21	189.59	2.1813	3.9096e-19	5.7474e-17	299	1111	229	1600	164	305	318	343	Plac8	placenta-specific 8 [Source:MGI Symbol;Acc:MGI:2445289]
ENSMUSG00000024014	1014.64	242.31	2.0658	4.4084e-19	6.434e-17	327	1016	417	1678	359	302	369	383	Pim1	proviral integration site 1 [Source:MGI Symbol;Acc:MGI:97584]
ENSMUSG00000056071	8460.3	1509.09	2.4877	4.7677e-19	6.9087e-17	2896	10329	2322	16392	2208	1836	2809	1801	S100a9	S100 calcium binding protein A9 (calgranulin B) [Source:MGI Symbol;Acc:MGI:1338947]
ENSMUSG00000016534	630.03	252.65	1.3226	5.044e-19	7.2573e-17	241	822	209	923	386	316	341	439	Lamp2	lysosomal-associated membrane protein 2 [Source:MGI Symbol;Acc:MGI:96748]
ENSMUSG00000028037	57.48	2.94	4.3212	5.3919e-19	7.7032e-17	17	54	22	111	4	5	4	4	Ifi44	interferon-induced protein 44 [Source:MGI Symbol;Acc:MGI:2443016]
ENSMUSG00000000957	82.51	2.01	5.4692	6.0615e-19	8.5993e-17	23	105	15	206	4	3	3	1	Mmp14	matrix metallopeptidase 14 (membrane-inserted) [Source:MGI Symbol;Acc:MGI:101900]
ENSMUSG00000104713	76.08	11.14	2.7395	1.6528e-18	2.3286e-16	27	85	28	122	11	11	17	30	Gbp6	guanylate binding protein 6 [Source:MGI Symbol;Acc:MGI:2140937]
ENSMUSG00000022534	253.79	33.98	2.9178	2.1916e-18	3.0663e-16	68	258	73	597	49	47	49	53	Mefv	Mediterranean fever [Source:MGI Symbol;Acc:MGI:1859396]
ENSMUSG00000001281	71.94	226.91	-1.6065	2.5869e-18	3.5945e-16	25	111	21	108	269	291	319	486	Itgb7	integrin beta 7 [Source:MGI Symbol;Acc:MGI:96616]
ENSMUSG00000041642	140.57	478.43	-1.7847	2.6175e-18	3.6123e-16	75	201	41	139	631	629	698	871	Kif21b	kinesin family member 21B [Source:MGI Symbol;Acc:MGI:109234]
ENSMUSG00000058794	487.57	193.6	1.3294	2.8631e-18	3.9245e-16	205	674	168	584	264	286	264	320	Nfe2	nuclear factor, erythroid derived 2 [Source:MGI Symbol;Acc:MGI:97308]
ENSMUSG00000022150	95.26	1.18	6.3599	3.1886e-18	4.3415e-16	24	81	20	278	1	2	2	2	Dab2	disabled 2, mitogen-responsive phosphoprotein [Source:MGI Symbol;Acc:MGI:109175]
ENSMUSG00000078922	112	16.76	2.7002	3.7319e-18	5.0138e-16	47	154	41	125	13	25	18	49	Tgtp1	T cell specific GTPase 1 [Source:MGI Symbol;Acc:MGI:98734]
ENSMUSG00000024737	257.73	37.13	2.8181	3.7264e-18	5.0138e-16	92	330	54	542	57	46	64	46	Slc15a3	solute carrier family 15, member 3 [Source:MGI Symbol;Acc:MGI:1929691]
ENSMUSG00000050592	27.5	159.29	-2.5973	4.4059e-18	5.8804e-16	7	39	14	28	228	181	186	365	Fam78a	family with sequence similarity 78, member A [Source:MGI Symbol;Acc:MGI:2443569]
ENSMUSG00000035208	364.62	110.47	1.7228	5.4488e-18	7.2248e-16	172	480	96	526	132	149	124	267	Slfn8	schlafen 8 [Source:MGI Symbol;Acc:MGI:2672859]
ENSMUSG00000003283	448.29	77.31	2.5467	5.581e-18	7.3521e-16	135	520	112	1008	118	98	93	148	Hck	hemopoietic cell kinase [Source:MGI Symbol;Acc:MGI:96052]
ENSMUSG00000018474	72.44	271.9	-1.8692	8.3739e-18	1.096e-15	24	124	22	96	371	349	324	586	Chd3	chromodomain helicase DNA binding protein 3 [Source:MGI Symbol;Acc:MGI:1344395]
ENSMUSG00000070327	1932.96	326.82	2.5637	9.6504e-18	1.255e-15	1037	2246	528	2599	568	321	289	791	Rnf213	ring finger protein 213 [Source:MGI Symbol;Acc:MGI:1289196]
ENSMUSG00000022514	206.26	35.99	2.517	9.7351e-18	1.2579e-15	98	196	51	390	32	46	57	85	Il1rap	interleukin 1 receptor accessory protein [Source:MGI Symbol;Acc:MGI:104975]
ENSMUSG00000024921	27.28	123.31	-2.166	1.0226e-17	1.313e-15	9	41	10	35	144	149	215	224	Smarca2	SWI/SNF related, matrix associated, actin dependent regulator of chromatin, subfamily a, member 2 [Source:MGI Symbol;Acc:MGI:99603]
ENSMUSG00000030748	615.68	176.33	1.8082	1.0784e-17	1.3759e-15	241	647	181	1150	252	201	242	355	Il4ra	interleukin 4 receptor, alpha [Source:MGI Symbol;Acc:MGI:105367]
ENSMUSG00000029298	437.26	157.41	1.4659	1.1135e-17	1.4118e-15	230	544	126	537	194	200	229	318	Gbp9	guanylate-binding protein 9 [Source:MGI Symbol;Acc:MGI:3605620]
ENSMUSG00000032786	219.25	28.43	2.9653	1.1312e-17	1.4254e-15	60	220	59	532	41	35	42	49	Alas1	aminolevulinic acid synthase 1 [Source:MGI Symbol;Acc:MGI:87989]
ENSMUSG00000042349	715.11	104.34	2.7805	1.2604e-17	1.5783e-15	235	912	150	1576	137	127	102	273	Ikbke	inhibitor of kappaB kinase epsilon [Source:MGI Symbol;Acc:MGI:1929612]
ENSMUSG00000024778	132.3	21.33	2.6516	1.4543e-17	1.81e-15	35	164	43	260	19	31	39	38	Fas	Fas (TNF receptor superfamily member 6) [Source:MGI Symbol;Acc:MGI:95484]
ENSMUSG00000024063	69.82	284.28	-2.0232	1.9045e-17	2.3559e-15	32	120	20	67	398	349	388	553	Lbh	limb-bud and heart [Source:MGI Symbol;Acc:MGI:1925139]
ENSMUSG00000037921	288.04	50.37	2.5244	2.0623e-17	2.5357e-15	139	265	73	539	90	57	65	80	Ddx60	DExD/H box helicase 60 [Source:MGI Symbol;Acc:MGI:2384570]
ENSMUSG00000024772	565.96	128.58	2.1461	2.132e-17	2.6055e-15	211	692	162	1008	235	167	140	201	Ehd1	EH-domain containing 1 [Source:MGI Symbol;Acc:MGI:1341878]
ENSMUSG00000030208	220.33	23.49	3.2479	2.5138e-17	3.0538e-15	107	302	40	372	52	27	18	38	Emp1	epithelial membrane protein 1 [Source:MGI Symbol;Acc:MGI:107941]
ENSMUSG00000078616	68.91	4.8	3.8243	2.9565e-17	3.5701e-15	22	66	22	145	7	4	4	15	Trim30c	tripartite motif-containing 30C [Source:MGI Symbol;Acc:MGI:4821257]
ENSMUSG00000058715	720.69	205.94	1.8161	3.0065e-17	3.6091e-15	241	913	193	1401	249	315	295	355	Fcer1g	Fc receptor, IgE, high affinity I, gamma polypeptide [Source:MGI Symbol;Acc:MGI:95496]
ENSMUSG00000029082	263.31	37.33	2.8402	3.0901e-17	3.6876e-15	70	340	69	573	64	44	57	49	Bst1	bone marrow stromal cell antigen 1 [Source:MGI Symbol;Acc:MGI:105370]
ENSMUSG00000051391	285.37	103.3	1.4856	3.1622e-17	3.7516e-15	120	408	70	449	132	139	133	214	Ywhag	tyrosine 3-monooxygenase/tryptophan 5-monooxygenase activation protein, gamma polypeptide [Source:MGI Symbol;Acc:MGI:108109]
ENSMUSG00000074151	462.48	159.76	1.5425	3.5683e-17	4.2087e-15	205	644	110	725	182	199	237	345	Nlrc5	NLR family, CARD domain containing 5 [Source:MGI Symbol;Acc:MGI:3612191]
ENSMUSG00000024661	18042.4	6229.7	1.5338	3.8689e-17	4.5369e-15	6970	19795	7793	22434	8212	9226	8422	10798	Fth1	ferritin heavy polypeptide 1 [Source:MGI Symbol;Acc:MGI:95588]
ENSMUSG00000026946	145.04	30.02	2.2734	3.9105e-17	4.5593e-15	48	142	51	276	33	41	42	65	Nmi	N-myc (and STAT) interactor [Source:MGI Symbol;Acc:MGI:1928368]
ENSMUSG00000043953	93.59	5.13	4.2048	4.0619e-17	4.7088e-15	26	81	33	206	2	9	13	6	Ccrl2	chemokine (C-C motif) receptor-like 2 [Source:MGI Symbol;Acc:MGI:1920904]
ENSMUSG00000024235	139.83	35.05	2.0174	4.2935e-17	4.949e-15	57	160	41	240	53	40	57	54	Map3k8	mitogen-activated protein kinase kinase kinase 8 [Source:MGI Symbol;Acc:MGI:1346878]
ENSMUSG00000115338	205.28	17.14	3.587	5.8343e-17	6.687e-15	38	163	82	491	22	19	28	33	Pnp	purine-nucleoside phosphorylase [Source:MGI Symbol;Acc:MGI:97365]
ENSMUSG00000069094	35.55	130.1	-1.8265	1.0371e-16	1.1821e-14	14	58	10	46	158	194	168	255	Pde7a	phosphodiesterase 7A [Source:MGI Symbol;Acc:MGI:1202402]
ENSMUSG00000047798	1145.29	173.61	2.7253	1.1055e-16	1.2529e-14	434	1139	288	2466	299	154	299	251	Cd300lf	CD300 molecule like family member F [Source:MGI Symbol;Acc:MGI:2442359]
ENSMUSG00000031444	144.34	24.26	2.5937	1.2467e-16	1.4051e-14	39	191	39	302	23	37	33	54	F10	coagulation factor X [Source:MGI Symbol;Acc:MGI:103107]
ENSMUSG00000096472	228.56	76.41	1.5949	1.3176e-16	1.4768e-14	89	275	71	375	94	121	115	116	Cdkn2d	cyclin dependent kinase inhibitor 2D [Source:MGI Symbol;Acc:MGI:105387]
ENSMUSG00000044103	342.37	45.16	2.9323	1.7421e-16	1.9419e-14	117	452	79	692	88	33	50	97	Il1f9	interleukin 1 family, member 9 [Source:MGI Symbol;Acc:MGI:2449929]
ENSMUSG00000032508	182.1	65.15	1.4966	1.9371e-16	2.1474e-14	74	237	51	293	72	84	96	141	Myd88	myeloid differentiation primary response gene 88 [Source:MGI Symbol;Acc:MGI:108005]
ENSMUSG00000038807	197.19	62.07	1.6868	2.0704e-16	2.2828e-14	81	252	56	316	74	91	106	91	Rap1gap2	RAP1 GTPase activating protein 2 [Source:MGI Symbol;Acc:MGI:3028623]
ENSMUSG00000036986	389.56	118.07	1.7181	2.149e-16	2.3566e-14	190	546	125	409	185	152	149	206	Pml	promyelocytic leukemia [Source:MGI Symbol;Acc:MGI:104662]
ENSMUSG00000022584	506.27	120.36	2.0827	2.1745e-16	2.3717e-14	146	601	149	1049	171	170	157	209	Ly6c2	lymphocyte antigen 6 complex, locus C2 [Source:MGI Symbol;Acc:MGI:3712069]
ENSMUSG00000079017	256.89	103.37	1.3193	2.9759e-16	3.2285e-14	96	373	87	336	123	160	150	176	Ifi27l2a	interferon, alpha-inducible protein 27 like 2A [Source:MGI Symbol;Acc:MGI:1924183]
ENSMUSG00000027347	62.69	208.64	-1.7532	3.0483e-16	3.2894e-14	27	89	21	73	268	229	292	471	Rasgrp1	RAS guanyl releasing protein 1 [Source:MGI Symbol;Acc:MGI:1314635]
ENSMUSG00000027995	258.98	33.7	2.9626	3.1248e-16	3.3541e-14	64	306	64	627	51	49	49	45	Tlr2	toll-like receptor 2 [Source:MGI Symbol;Acc:MGI:1346060]
ENSMUSG00000032068	68.36	1.8	5.2246	3.5038e-16	3.7411e-14	52	79	8	86	3	2	1	5	Plet1	placenta expressed transcript 1 [Source:MGI Symbol;Acc:MGI:1923759]
ENSMUSG00000075602	324.64	100.2	1.6968	3.9634e-16	4.2097e-14	149	519	94	348	108	148	157	182	Ly6a	lymphocyte antigen 6 complex, locus A [Source:MGI Symbol;Acc:MGI:107527]
ENSMUSG00000007041	412.99	186.1	1.1597	5.1409e-16	5.432e-14	164	561	123	621	201	260	297	351	Clic1	chloride intracellular channel 1 [Source:MGI Symbol;Acc:MGI:2148924]
ENSMUSG00000039813	48.37	4.77	3.3007	5.2547e-16	5.5234e-14	21	52	14	83	4	4	8	14	Tbc1d2	TBC1 domain family, member 2 [Source:MGI Symbol;Acc:MGI:2652885]
ENSMUSG00000037321	458.95	192.67	1.2672	5.6626e-16	5.9215e-14	175	614	132	745	242	284	288	317	Tap1	transporter 1, ATP-binding cassette, sub-family B (MDR/TAP) [Source:MGI Symbol;Acc:MGI:98483]
ENSMUSG00000070427	51.67	7.27	2.8834	6.6572e-16	6.9259e-14	24	64	12	87	13	8	10	11	Il18bp	interleukin 18 binding protein [Source:MGI Symbol;Acc:MGI:1333800]
ENSMUSG00000006818	618.61	121.23	2.3532	7.1261e-16	7.3758e-14	192	611	258	1041	189	179	184	139	Sod2	superoxide dismutase 2, mitochondrial [Source:MGI Symbol;Acc:MGI:98352]
ENSMUSG00000072620	997.78	377.57	1.4082	7.5165e-16	7.7405e-14	336	1344	288	1757	453	477	543	794	Slfn2	schlafen 2 [Source:MGI Symbol;Acc:MGI:1313258]
ENSMUSG00000002325	305.51	118.71	1.3643	7.6665e-16	7.855e-14	98	385	114	472	134	166	173	237	Irf9	interferon regulatory factor 9 [Source:MGI Symbol;Acc:MGI:107587]
ENSMUSG00000000982	206.02	2.93	6.1072	9.0613e-16	9.2375e-14	35	145	23	778	3	1	4	11	Ccl3	chemokine (C-C motif) ligand 3 [Source:MGI Symbol;Acc:MGI:98260]
ENSMUSG00000024401	70.02	4.43	4.0092	9.6285e-16	9.7667e-14	24	95	10	165	4	4	9	10	Tnf	tumor necrosis factor [Source:MGI Symbol;Acc:MGI:104798]
ENSMUSG00000113701	61.01	0.73	6.534	1.0138e-15	1.0232e-13	19	92	13	122	3	0	0	1	B230303A05Rik	RIKEN cDNA B230303A05 gene [Source:MGI Symbol;Acc:MGI:3646895]
ENSMUSG00000026944	18.1	90.4	-2.37	1.0227e-15	1.0271e-13	10	23	5	21	135	98	122	183	Abca2	ATP-binding cassette, sub-family A (ABC1), member 2 [Source:MGI Symbol;Acc:MGI:99606]
ENSMUSG00000049871	10.79	70.01	-2.6693	1.1401e-15	1.1394e-13	6	18	2	12	79	90	96	159	Nlrc3	NLR family, CARD domain containing 3 [Source:MGI Symbol;Acc:MGI:2444070]
ENSMUSG00000044350	66.41	3.91	4.1259	1.2578e-15	1.2508e-13	27	66	12	157	8	5	2	8	Lacc1	laccase domain containing 1 [Source:MGI Symbol;Acc:MGI:2445077]
ENSMUSG00000025804	607.7	112.43	2.4422	1.3741e-15	1.3598e-13	205	657	155	1329	171	124	199	156	Ccr1	chemokine (C-C motif) receptor 1 [Source:MGI Symbol;Acc:MGI:104618]
ENSMUSG00000016528	460.18	131.5	1.8207	1.8641e-15	1.8358e-13	153	620	113	902	157	168	204	255	Mapkapk2	MAP kinase-activated protein kinase 2 [Source:MGI Symbol;Acc:MGI:109298]
ENSMUSG00000030681	204.86	53.72	1.9519	2.3463e-15	2.2995e-13	69	230	60	406	76	69	80	90	Mvp	major vault protein [Source:MGI Symbol;Acc:MGI:1925638]
ENSMUSG00000024679	131.32	10.68	3.6302	2.5777e-15	2.5141e-13	35	147	25	350	14	12	10	30	Ms4a6d	membrane-spanning 4-domains, subfamily A, member 6D [Source:MGI Symbol;Acc:MGI:1916024]
ENSMUSG00000003206	48.68	5.93	3.0554	2.8187e-15	2.736e-13	17	57	14	93	8	5	9	14	Ebi3	Epstein-Barr virus induced gene 3 [Source:MGI Symbol;Acc:MGI:1354171]
ENSMUSG00000027951	285.35	116.61	1.3015	2.9962e-15	2.8944e-13	117	344	85	463	160	166	142	223	Adar	adenosine deaminase, RNA-specific [Source:MGI Symbol;Acc:MGI:1889575]
ENSMUSG00000046908	108.18	13.14	3.0601	3.1566e-15	3.035e-13	23	120	40	226	12	21	25	19	Ltb4r1	leukotriene B4 receptor 1 [Source:MGI Symbol;Acc:MGI:1309472]
ENSMUSG00000025068	493.88	76.28	2.6994	3.1882e-15	3.0509e-13	307	680	71	682	123	93	100	130	Gsto1	glutathione S-transferase omega 1 [Source:MGI Symbol;Acc:MGI:1342273]
ENSMUSG00000028328	292.48	34.85	3.0562	3.2836e-15	3.1274e-13	107	197	176	303	44	55	52	52	Tmod1	tropomodulin 1 [Source:MGI Symbol;Acc:MGI:98775]
ENSMUSG00000002227	121.83	44.28	1.4702	3.7385e-15	3.5276e-13	51	161	37	176	62	52	63	86	Mov10	Mov10 RISC complex RNA helicase [Source:MGI Symbol;Acc:MGI:97054]
ENSMUSG00000015950	542.06	152.5	1.8431	3.7354e-15	3.5276e-13	172	779	133	1039	204	228	206	257	Ncf1	neutrophil cytosolic factor 1 [Source:MGI Symbol;Acc:MGI:97283]
ENSMUSG00000042677	102.21	27.39	1.9197	3.922e-15	3.6836e-13	35	118	33	184	31	41	39	52	Zc3h12a	zinc finger CCCH type containing 12A [Source:MGI Symbol;Acc:MGI:2385891]
ENSMUSG00000026773	607.27	76.3	2.9999	4.3826e-15	4.0973e-13	182	549	122	1662	112	101	108	125	Pfkfb3	6-phosphofructo-2-kinase/fructose-2,6-biphosphatase 3 [Source:MGI Symbol;Acc:MGI:2181202]
ENSMUSG00000078812	524.8	234.01	1.1608	4.7451e-15	4.4158e-13	191	591	196	808	286	319	342	444	Eif5a	eukaryotic translation initiation factor 5A [Source:MGI Symbol;Acc:MGI:106248]
ENSMUSG00000032657	8.02	59.66	-2.9677	4.7747e-15	4.423e-13	2	12	4	8	62	94	91	107	Fam189b	family with sequence similarity 189, member B [Source:MGI Symbol;Acc:MGI:1915771]
ENSMUSG00000022216	339.05	145.82	1.2145	4.8844e-15	4.4984e-13	127	428	123	476	176	195	243	245	Psme1	proteasome (prosome, macropain) activator subunit 1 (PA28 alpha) [Source:MGI Symbol;Acc:MGI:1096367]
ENSMUSG00000020400	338.22	60.19	2.5056	4.9004e-15	4.4984e-13	96	417	78	782	95	70	80	109	Tnip1	TNFAIP3 interacting protein 1 [Source:MGI Symbol;Acc:MGI:1926194]
ENSMUSG00000028599	778.9	183.38	2.0932	6.2106e-15	5.6754e-13	255	871	194	1719	219	254	297	311	Tnfrsf1b	tumor necrosis factor receptor superfamily, member 1b [Source:MGI Symbol;Acc:MGI:1314883]
ENSMUSG00000028494	383.11	63.42	2.605	6.3107e-15	5.741e-13	132	412	83	894	69	76	126	103	Plin2	perilipin 2 [Source:MGI Symbol;Acc:MGI:87920]
ENSMUSG00000031089	50.48	1.38	5.2086	7.5835e-15	6.8682e-13	38	47	8	68	2	2	2	2	Slc6a14	solute carrier family 6 (neurotransmitter transporter), member 14 [Source:MGI Symbol;Acc:MGI:1890216]
ENSMUSG00000017485	105.19	262.48	-1.3138	9.3916e-15	8.4678e-13	37	157	37	135	325	320	384	544	Top2b	topoisomerase (DNA) II beta [Source:MGI Symbol;Acc:MGI:98791]
ENSMUSG00000033880	319.21	114.93	1.4954	1.4791e-14	1.3277e-12	115	463	88	519	170	165	154	180	Lgals3bp	lectin, galactoside-binding, soluble, 3 binding protein [Source:MGI Symbol;Acc:MGI:99554]
ENSMUSG00000033508	261.79	46.89	2.496	1.496e-14	1.3369e-12	109	326	71	438	92	49	75	48	Asprv1	aspartic peptidase, retroviral-like 1 [Source:MGI Symbol;Acc:MGI:1915105]
ENSMUSG00000032596	736.15	159.76	2.2017	1.611e-14	1.4335e-12	196	661	348	1244	226	203	217	299	Uba7	ubiquitin-like modifier activating enzyme 7 [Source:MGI Symbol;Acc:MGI:1349462]
ENSMUSG00000027540	789.76	262.4	1.5978	1.6594e-14	1.4701e-12	312	979	198	1453	385	355	374	416	Ptpn1	protein tyrosine phosphatase, non-receptor type 1 [Source:MGI Symbol;Acc:MGI:97805]
ENSMUSG00000027009	165.87	516.94	-1.6395	1.8689e-14	1.6485e-12	77	223	48	220	804	587	571	1131	Itga4	integrin alpha 4 [Source:MGI Symbol;Acc:MGI:96603]
ENSMUSG00000073490	220.73	30.93	2.8368	1.9631e-14	1.724e-12	90	216	50	481	26	55	28	82	Ifi207	interferon activated gene 207 [Source:MGI Symbol;Acc:MGI:2138302]
ENSMUSG00000018899	344.97	115.2	1.5854	2.1858e-14	1.9114e-12	129	577	110	399	124	142	196	228	Irf1	interferon regulatory factor 1 [Source:MGI Symbol;Acc:MGI:96590]
ENSMUSG00000055447	1010.44	422.84	1.2515	2.2762e-14	1.9818e-12	374	1218	416	1283	555	585	637	706	Cd47	CD47 antigen (Rh-related antigen, integrin-associated signal transducer) [Source:MGI Symbol;Acc:MGI:96617]
ENSMUSG00000019082	112.55	23.22	2.2878	2.3167e-14	2.0085e-12	31	114	42	221	30	33	30	45	Slc25a22	solute carrier family 25 (mitochondrial carrier, glutamate), member 22 [Source:MGI Symbol;Acc:MGI:1915517]
ENSMUSG00000024948	153.79	406.51	-1.3861	2.3815e-14	2.0559e-12	63	258	44	180	518	584	569	731	Map4k2	mitogen-activated protein kinase kinase kinase kinase 2 [Source:MGI Symbol;Acc:MGI:1346883]
ENSMUSG00000024669	8.6	67.4	-2.8497	2.5234e-14	2.1691e-12	3	18	2	10	66	88	104	151	Cd5	CD5 antigen [Source:MGI Symbol;Acc:MGI:88340]
ENSMUSG00000000157	43.77	3.49	3.712	3.1145e-14	2.6548e-12	14	44	13	94	5	4	7	4	Itgb2l	integrin beta 2-like [Source:MGI Symbol;Acc:MGI:1277979]
ENSMUSG00000057596	375.88	94.54	2.0021	3.9327e-14	3.3382e-12	149	488	95	663	163	84	143	163	Trim30d	tripartite motif-containing 30D [Source:MGI Symbol;Acc:MGI:3035181]
ENSMUSG00000015766	70.23	9.43	2.9282	4.0011e-14	3.3821e-12	17	83	23	147	13	16	8	19	Eps8	epidermal growth factor receptor pathway substrate 8 [Source:MGI Symbol;Acc:MGI:104684]
ENSMUSG00000015733	603.25	257.96	1.2365	4.2099e-14	3.5438e-12	246	759	157	1047	320	355	367	491	Capza2	capping protein (actin filament) muscle Z-line, alpha 2 [Source:MGI Symbol;Acc:MGI:106222]
ENSMUSG00000034059	127.39	4.67	4.7893	5.4226e-14	4.5458e-12	16	102	82	196	11	8	2	5	Ypel4	yippee like 4 [Source:MGI Symbol;Acc:MGI:3605071]
ENSMUSG00000017929	178.35	68.87	1.3783	5.9155e-14	4.9386e-12	80	217	51	273	71	106	105	128	B4galt5	UDP-Gal:betaGlcNAc beta 1,4-galactosyltransferase, polypeptide 5 [Source:MGI Symbol;Acc:MGI:1927169]
ENSMUSG00000021025	624.29	89.36	2.8103	6.1745e-14	5.1337e-12	150	671	135	1680	104	112	133	188	Nfkbia	nuclear factor of kappa light polypeptide gene enhancer in B cells inhibitor, alpha [Source:MGI Symbol;Acc:MGI:104741]
ENSMUSG00000021322	60.51	8.8	2.8367	6.6369e-14	5.4956e-12	17	71	18	127	14	10	14	13	Aoah	acyloxyacyl hydrolase [Source:MGI Symbol;Acc:MGI:1350928]
ENSMUSG00000066363	54.91	4.33	3.6484	6.8242e-14	5.6278e-12	13	111	20	58	5	6	3	13	Serpina3f	serine (or cysteine) peptidase inhibitor, clade A, member 3F [Source:MGI Symbol;Acc:MGI:2182838]
ENSMUSG00000005800	506.79	128.16	1.9937	7.4859e-14	6.1485e-12	171	731	142	858	242	147	163	184	Mmp8	matrix metallopeptidase 8 [Source:MGI Symbol;Acc:MGI:1202395]
ENSMUSG00000024670	15.39	85.3	-2.4667	8.2323e-14	6.7343e-12	6	30	5	12	104	117	110	181	Cd6	CD6 antigen [Source:MGI Symbol;Acc:MGI:103566]
ENSMUSG00000053113	626.01	104.37	2.5896	9.6287e-14	7.8449e-12	207	586	156	1496	117	114	219	164	Socs3	suppressor of cytokine signaling 3 [Source:MGI Symbol;Acc:MGI:1201791]
ENSMUSG00000040350	9.96	80.17	-3.292	1.0247e-13	8.2824e-12	7	9	4	5	99	129	126	111	Trim7	tripartite motif-containing 7 [Source:MGI Symbol;Acc:MGI:2137353]
ENSMUSG00000022657	5.59	50.03	-3.0463	1.0241e-13	8.2824e-12	4	9	0	8	66	56	78	98	Cd96	CD96 antigen [Source:MGI Symbol;Acc:MGI:1934368]
ENSMUSG00000050600	22.73	107.51	-2.2345	1.1478e-13	9.2402e-12	11	40	6	21	160	137	159	171	Zfp831	zinc finger protein 831 [Source:MGI Symbol;Acc:MGI:3641861]
ENSMUSG00000056116	791.49	155.65	2.3396	1.3896e-13	1.1143e-11	260	782	446	785	157	245	241	282	H2-T22	histocompatibility 2, T region locus 22 [Source:MGI Symbol;Acc:MGI:95956]
ENSMUSG00000055639	44.8	4.39	3.3725	1.4118e-13	1.1276e-11	24	42	9	85	6	4	8	8	Dach1	dachshund family transcription factor 1 [Source:MGI Symbol;Acc:MGI:1277991]
ENSMUSG00000026012	19.46	133.11	-2.735	1.5884e-13	1.2637e-11	8	44	5	13	146	178	216	254	Cd28	CD28 antigen [Source:MGI Symbol;Acc:MGI:88327]
ENSMUSG00000032231	996.57	224.55	2.1547	1.8022e-13	1.4282e-11	278	1097	283	2233	339	275	345	348	Anxa2	annexin A2 [Source:MGI Symbol;Acc:MGI:88246]
ENSMUSG00000046223	278.13	43.16	2.7016	1.8568e-13	1.4657e-11	79	273	78	658	49	80	69	50	Plaur	plasminogen activator, urokinase receptor [Source:MGI Symbol;Acc:MGI:97612]
ENSMUSG00000026482	81.96	12.29	2.7761	2.1377e-13	1.6809e-11	30	89	19	179	22	10	18	22	Rgl1	ral guanine nucleotide dissociation stimulator,-like 1 [Source:MGI Symbol;Acc:MGI:107484]
ENSMUSG00000022747	179.99	55.15	1.7041	2.3228e-13	1.8194e-11	66	179	66	306	82	61	77	107	St3gal6	ST3 beta-galactoside alpha-2,3-sialyltransferase 6 [Source:MGI Symbol;Acc:MGI:1888707]
ENSMUSG00000026177	321	63.59	2.3518	2.8439e-13	2.219e-11	100	365	77	732	88	95	102	81	Slc11a1	solute carrier family 11 (proton-coupled divalent metal ion transporters), member 1 [Source:MGI Symbol;Acc:MGI:1345275]
ENSMUSG00000035373	32.43	0	8.0478	3.0613e-13	2.3795e-11	8	39	11	65	0	0	0	0	Ccl7	chemokine (C-C motif) ligand 7 [Source:MGI Symbol;Acc:MGI:99512]
ENSMUSG00000024121	331.02	128.26	1.3655	3.5192e-13	2.7249e-11	119	412	128	454	176	202	177	190	Atp6v0c	ATPase, H+ transporting, lysosomal V0 subunit C [Source:MGI Symbol;Acc:MGI:88116]
ENSMUSG00000042492	166.4	55.49	1.6018	3.6013e-13	2.7779e-11	71	196	42	298	72	65	78	118	Tbc1d10b	TBC1 domain family, member 10b [Source:MGI Symbol;Acc:MGI:1915699]
ENSMUSG00000024675	359.1	82.69	2.1233	3.6867e-13	2.8331e-11	140	395	89	725	91	130	78	206	Ms4a4c	membrane-spanning 4-domains, subfamily A, member 4C [Source:MGI Symbol;Acc:MGI:1927656]
ENSMUSG00000039960	46.97	4.7	3.3597	3.8124e-13	2.9186e-11	20	50	13	85	6	3	13	5	Rhou	ras homolog family member U [Source:MGI Symbol;Acc:MGI:1916831]
ENSMUSG00000039531	121.19	42.09	1.5268	3.8367e-13	2.9261e-11	55	133	36	193	53	51	67	79	Zup1	zinc finger containing ubiquitin peptidase 1 [Source:MGI Symbol;Acc:MGI:1919830]
ENSMUSG00000022180	34.62	1.87	4.2618	4.1774e-13	3.1741e-11	9	37	11	76	2	3	3	3	Slc7a8	solute carrier family 7 (cationic amino acid transporter, y+ system), member 8 [Source:MGI Symbol;Acc:MGI:1355323]
ENSMUSG00000035385	62.61	0.55	6.9558	4.2261e-13	3.1991e-11	11	75	21	142	0	3	0	0	Ccl2	chemokine (C-C motif) ligand 2 [Source:MGI Symbol;Acc:MGI:98259]
ENSMUSG00000030671	37.75	148.32	-1.9491	4.776e-13	3.6019e-11	15	67	11	41	151	197	262	274	Pde3b	phosphodiesterase 3B, cGMP-inhibited [Source:MGI Symbol;Acc:MGI:1333863]
ENSMUSG00000022475	35.42	101.92	-1.5757	5.3227e-13	3.9993e-11	15	43	13	45	131	134	133	212	Hdac7	histone deacetylase 7 [Source:MGI Symbol;Acc:MGI:1891835]
ENSMUSG00000004837	22.42	102.72	-2.0904	5.6194e-13	4.2066e-11	5	46	7	29	118	138	157	200	Grap	GRB2-related adaptor protein [Source:MGI Symbol;Acc:MGI:1918770]
ENSMUSG00000051910	75.65	12.09	2.64	5.7274e-13	4.2717e-11	19	73	37	121	20	14	18	18	Sox6	SRY (sex determining region Y)-box 6 [Source:MGI Symbol;Acc:MGI:98368]
ENSMUSG00000060477	156.98	51.03	1.6556	5.9318e-13	4.408e-11	56	203	42	289	72	68	77	81	Irak2	interleukin-1 receptor-associated kinase 2 [Source:MGI Symbol;Acc:MGI:2429603]
ENSMUSG00000040659	336.85	86.27	1.9795	6.7723e-13	5.0143e-11	100	411	92	707	101	116	154	135	Efhd2	EF hand domain containing 2 [Source:MGI Symbol;Acc:MGI:106504]
ENSMUSG00000002033	19.13	134.61	-2.8842	7.7618e-13	5.726e-11	8	33	8	10	111	188	239	274	Cd3g	CD3 antigen, gamma polypeptide [Source:MGI Symbol;Acc:MGI:88333]
ENSMUSG00000066621	44.04	152.42	-1.8439	7.9095e-13	5.8137e-11	22	54	15	49	137	249	222	308	Tecpr1	tectonin beta-propeller repeat containing 1 [Source:MGI Symbol;Acc:MGI:1917631]
ENSMUSG00000046841	147.15	27.11	2.4697	7.9469e-13	5.8202e-11	52	167	39	299	47	35	44	27	Ckap4	cytoskeleton-associated protein 4 [Source:MGI Symbol;Acc:MGI:2444926]
ENSMUSG00000032126	582.39	62.33	3.2212	8.0973e-13	5.909e-11	112	392	380	821	79	97	103	81	Hmbs	hydroxymethylbilane synthase [Source:MGI Symbol;Acc:MGI:96112]
ENSMUSG00000044167	57.75	166.66	-1.5628	8.305e-13	6.0388e-11	23	85	22	59	226	215	254	285	Foxo1	forkhead box O1 [Source:MGI Symbol;Acc:MGI:1890077]
ENSMUSG00000053338	123.01	14.54	3.1169	8.6994e-13	6.303e-11	33	137	32	291	32	13	20	17	Tarm1	T cell-interacting, activating receptor on myeloid cells 1 [Source:MGI Symbol;Acc:MGI:2442280]
ENSMUSG00000000409	55.43	208.53	-1.8823	9.6609e-13	6.9748e-11	22	107	15	56	237	267	296	459	Lck	lymphocyte protein tyrosine kinase [Source:MGI Symbol;Acc:MGI:96756]
ENSMUSG00000024975	98.72	264.03	-1.4259	1.0594e-12	7.621e-11	42	147	32	114	287	320	444	533	Pdcd4	programmed cell death 4 [Source:MGI Symbol;Acc:MGI:107490]
ENSMUSG00000026358	47.18	5.53	3.1671	1.1963e-12	8.5757e-11	17	59	9	104	6	10	9	7	Rgs1	regulator of G-protein signaling 1 [Source:MGI Symbol;Acc:MGI:1354694]
ENSMUSG00000020143	200.01	425.22	-1.0564	1.2115e-12	8.6545e-11	81	295	52	303	540	534	616	847	Dock2	dedicator of cyto-kinesis 2 [Source:MGI Symbol;Acc:MGI:2149010]
ENSMUSG00000067212	753.73	296.12	1.3431	1.2655e-12	9.0079e-11	237	923	327	1013	362	436	419	535	H2-T23	histocompatibility 2, T region locus 23 [Source:MGI Symbol;Acc:MGI:95957]
ENSMUSG00000053977	40.7	159.48	-2.0034	1.4374e-12	1.0196e-10	20	65	13	34	198	176	227	364	Cd8a	CD8 antigen, alpha chain [Source:MGI Symbol;Acc:MGI:88346]
ENSMUSG00000026466	317.86	111.76	1.5193	1.4859e-12	1.0503e-10	148	356	79	552	159	159	157	177	Tor1aip1	torsin A interacting protein 1 [Source:MGI Symbol;Acc:MGI:3582693]
ENSMUSG00000092021	52.07	5.41	3.2726	1.5879e-12	1.1185e-10	28	85	16	36	8	10	6	7	Gbp11	guanylate binding protein 11 [Source:MGI Symbol;Acc:MGI:3646307]
ENSMUSG00000016933	31.91	128.06	-2.0886	1.6247e-12	1.1405e-10	16	47	12	22	152	181	173	260	Plcg1	phospholipase C, gamma 1 [Source:MGI Symbol;Acc:MGI:97615]
ENSMUSG00000022876	301.35	65.59	2.2155	1.8778e-12	1.3136e-10	79	366	76	697	84	80	109	114	Samsn1	SAM domain, SH3 domain and nuclear localization signals, 1 [Source:MGI Symbol;Acc:MGI:1914992]
ENSMUSG00000033777	381.96	112.12	1.7844	1.9038e-12	1.3272e-10	141	505	85	749	160	136	181	178	Tlr13	toll-like receptor 13 [Source:MGI Symbol;Acc:MGI:3045213]
ENSMUSG00000023169	76.22	213.35	-1.4792	2.2015e-12	1.5295e-10	34	125	22	82	289	269	283	431	Slc38a1	solute carrier family 38, member 1 [Source:MGI Symbol;Acc:MGI:2145895]
ENSMUSG00000038774	149.82	45.54	1.6876	2.2883e-12	1.5844e-10	67	145	57	209	61	51	56	108	Ascc3	activating signal cointegrator 1 complex subunit 3 [Source:MGI Symbol;Acc:MGI:1925237]
ENSMUSG00000026616	8.3	90.28	-3.3014	2.6024e-12	1.7957e-10	5	20	0	8	130	98	87	237	Cr2	complement receptor 2 [Source:MGI Symbol;Acc:MGI:88489]
ENSMUSG00000053175	122.37	27.26	2.2099	2.643e-12	1.8176e-10	39	169	28	250	37	43	42	35	Bcl3	B cell leukemia/lymphoma 3 [Source:MGI Symbol;Acc:MGI:88140]
ENSMUSG00000030403	818.82	247.36	1.7342	3.034e-12	2.0794e-10	292	1012	192	1674	367	289	365	433	Vasp	vasodilator-stimulated phosphoprotein [Source:MGI Symbol;Acc:MGI:109268]
ENSMUSG00000035356	298.33	60.08	2.3255	3.4628e-12	2.3653e-10	101	320	60	723	65	81	102	109	Nfkbiz	nuclear factor of kappa light polypeptide gene enhancer in B cells inhibitor, zeta [Source:MGI Symbol;Acc:MGI:1931595]
ENSMUSG00000037095	248.71	44.22	2.5089	3.9222e-12	2.6701e-10	86	273	57	560	85	40	66	63	Lrg1	leucine-rich alpha-2-glycoprotein 1 [Source:MGI Symbol;Acc:MGI:1924155]
ENSMUSG00000001025	382.56	107.23	1.8483	3.9932e-12	2.7094e-10	140	473	95	747	140	146	193	141	S100a6	S100 calcium binding protein A6 (calcyclin) [Source:MGI Symbol;Acc:MGI:1339467]
ENSMUSG00000023034	570.7	67.71	3.0806	4.0583e-12	2.7444e-10	165	589	88	1619	52	104	128	120	Nr4a1	nuclear receptor subfamily 4, group A, member 1 [Source:MGI Symbol;Acc:MGI:1352454]
ENSMUSG00000052336	4.86	56.75	-3.2377	4.1952e-12	2.8275e-10	2	5	0	15	61	98	73	105	Cx3cr1	chemokine (C-X3-C motif) receptor 1 [Source:MGI Symbol;Acc:MGI:1333815]
ENSMUSG00000030786	417	78.13	2.4279	4.2306e-12	2.8419e-10	101	512	97	1022	98	106	135	117	Itgam	integrin alpha M [Source:MGI Symbol;Acc:MGI:96607]
ENSMUSG00000091575	8.65	78.38	-3.2776	4.4251e-12	2.9628e-10	9	10	0	7	101	89	84	207	2010016I18Rik	RIKEN cDNA 2010016I18 gene [Source:MGI Symbol;Acc:MGI:1916456]
ENSMUSG00000039145	16.11	87.91	-2.3934	5.3603e-12	3.5771e-10	7	14	4	34	99	125	157	134	Camk1d	calcium/calmodulin-dependent protein kinase ID [Source:MGI Symbol;Acc:MGI:2442190]
ENSMUSG00000031652	404.3	77.62	2.3892	5.3922e-12	3.5866e-10	123	509	98	875	142	72	76	173	N4bp1	NEDD4 binding protein 1 [Source:MGI Symbol;Acc:MGI:2136825]
ENSMUSG00000038037	42.66	4.19	3.2805	5.8594e-12	3.8846e-10	15	53	19	49	0	9	7	10	Socs1	suppressor of cytokine signaling 1 [Source:MGI Symbol;Acc:MGI:1354910]
ENSMUSG00000058818	619.57	184.67	1.7532	6.1376e-12	4.0558e-10	214	674	167	1295	277	203	264	348	Pirb	paired Ig-like receptor B [Source:MGI Symbol;Acc:MGI:894311]
ENSMUSG00000002111	471.83	125.77	1.9194	6.657e-12	4.3847e-10	145	578	117	1022	180	158	201	194	Spi1	spleen focus forming virus (SFFV) proviral integration oncogene [Source:MGI Symbol;Acc:MGI:98282]
ENSMUSG00000021814	214.71	63.82	1.7553	7.1451e-12	4.691e-10	65	220	78	408	90	82	76	133	Anxa7	annexin A7 [Source:MGI Symbol;Acc:MGI:88031]
ENSMUSG00000026712	35.48	0.93	5.2035	7.2711e-12	4.7584e-10	15	34	6	85	0	2	1	3	Mrc1	mannose receptor, C type 1 [Source:MGI Symbol;Acc:MGI:97142]
ENSMUSG00000028042	219.62	68.56	1.6978	7.8378e-12	5.1127e-10	85	285	54	401	105	88	70	146	Zbtb7b	zinc finger and BTB domain containing 7B [Source:MGI Symbol;Acc:MGI:102755]
ENSMUSG00000029490	76.12	11.36	2.781	8.3097e-12	5.4032e-10	38	77	12	162	15	21	13	17	Mfsd7a	major facilitator superfamily domain containing 7A [Source:MGI Symbol;Acc:MGI:2442629]
ENSMUSG00000032712	403.35	156.22	1.3666	8.3466e-12	5.4087e-10	201	455	107	623	184	189	208	368	Resf1	retroelement silencing factor 1 [Source:MGI Symbol;Acc:MGI:1914496]
ENSMUSG00000030069	36.58	0.2	7.526	8.3716e-12	5.4087e-10	11	52	8	77	1	0	0	0	Prok2	prokineticin 2 [Source:MGI Symbol;Acc:MGI:1354178]
ENSMUSG00000035517	364.55	77.48	2.2258	8.5416e-12	5.5011e-10	123	322	195	436	129	116	88	114	Tdrd7	tudor domain containing 7 [Source:MGI Symbol;Acc:MGI:2140279]
ENSMUSG00000016529	30.96	0	8.0026	9.2584e-12	5.9438e-10	5	42	7	81	0	0	0	0	Il10	interleukin 10 [Source:MGI Symbol;Acc:MGI:96537]
ENSMUSG00000042745	37.95	4.22	3.1358	9.759e-12	6.2454e-10	14	45	11	69	5	4	3	15	Id1	inhibitor of DNA binding 1, HLH protein [Source:MGI Symbol;Acc:MGI:96396]
ENSMUSG00000053835	413.91	180.04	1.2073	9.8548e-12	6.2869e-10	169	635	120	543	256	229	208	384	H2-T24	histocompatibility 2, T region locus 24 [Source:MGI Symbol;Acc:MGI:95958]
ENSMUSG00000050628	103.18	34.24	1.5841	1.049e-11	6.6715e-10	41	109	35	170	45	39	47	75	Ubald2	UBA-like domain containing 2 [Source:MGI Symbol;Acc:MGI:1914635]
ENSMUSG00000102037	35.95	1.96	4.234	1.105e-11	7.0056e-10	10	40	7	94	2	3	2	5	Bcl2a1a	B cell leukemia/lymphoma 2 related protein A1a [Source:MGI Symbol;Acc:MGI:102687]
ENSMUSG00000005161	7184.82	1111.51	2.6919	1.1109e-11	7.0208e-10	2349	5870	4619	6026	1501	1724	1752	1426	Prdx2	peroxiredoxin 2 [Source:MGI Symbol;Acc:MGI:109486]
ENSMUSG00000032501	165.62	27.95	2.5928	1.2279e-11	7.7363e-10	60	209	36	343	39	37	58	24	Trib1	tribbles pseudokinase 1 [Source:MGI Symbol;Acc:MGI:2443397]
ENSMUSG00000029063	583.07	189.36	1.6341	1.3387e-11	8.4079e-10	189	826	133	1160	246	257	252	372	Nadk	NAD kinase [Source:MGI Symbol;Acc:MGI:2183149]
ENSMUSG00000049130	330.58	74.09	2.1722	1.5203e-11	9.5189e-10	117	412	75	686	115	81	138	91	C5ar1	complement component 5a receptor 1 [Source:MGI Symbol;Acc:MGI:88232]
ENSMUSG00000053411	59.26	230.23	-1.984	1.6386e-11	1.0197e-09	22	103	24	43	262	311	362	436	Cbx7	chromobox 7 [Source:MGI Symbol;Acc:MGI:1196439]
ENSMUSG00000019173	661.91	258.1	1.3528	1.6535e-11	1.0258e-09	237	698	284	925	374	370	331	437	Rab5c	RAB5C, member RAS oncogene family [Source:MGI Symbol;Acc:MGI:105306]
ENSMUSG00000029752	83.23	7.69	3.4421	1.6604e-11	1.027e-09	16	51	44	167	11	11	13	9	Asns	asparagine synthetase [Source:MGI Symbol;Acc:MGI:1350929]
ENSMUSG00000041481	78.51	18.29	2.1359	1.6763e-11	1.0336e-09	20	144	26	105	29	23	21	35	Serpina3g	serine (or cysteine) peptidase inhibitor, clade A, member 3G [Source:MGI Symbol;Acc:MGI:105046]
ENSMUSG00000021270	614.15	164.92	1.8956	1.6987e-11	1.0443e-09	131	856	269	915	182	212	232	373	Hsp90aa1	heat shock protein 90, alpha (cytosolic), class A member 1 [Source:MGI Symbol;Acc:MGI:96250]
ENSMUSG00000015932	254.16	99.04	1.3711	1.7273e-11	1.0586e-09	76	350	92	392	125	152	150	151	Dstn	destrin [Source:MGI Symbol;Acc:MGI:1929270]
ENSMUSG00000028464	59.66	15.5	1.8832	1.7418e-11	1.0643e-09	26	72	23	69	16	20	23	35	Tpm2	tropomyosin 2, beta [Source:MGI Symbol;Acc:MGI:98810]
ENSMUSG00000030747	87.19	10.55	3.0725	1.9087e-11	1.1628e-09	13	102	30	205	10	16	20	16	Dgat2	diacylglycerol O-acyltransferase 2 [Source:MGI Symbol;Acc:MGI:1915050]
ENSMUSG00000032093	21.09	103.51	-2.3724	2.1384e-11	1.295e-09	10	35	8	12	108	140	150	228	Cd3e	CD3 antigen, epsilon polypeptide [Source:MGI Symbol;Acc:MGI:88332]
ENSMUSG00000018930	115.85	5.08	4.5359	2.6869e-11	1.6175e-09	16	92	15	430	9	4	7	10	Ccl4	chemokine (C-C motif) ligand 4 [Source:MGI Symbol;Acc:MGI:98261]
ENSMUSG00000026864	549.78	204.31	1.4346	2.7641e-11	1.659e-09	169	643	179	1040	229	289	328	365	Hspa5	heat shock protein 5 [Source:MGI Symbol;Acc:MGI:95835]
ENSMUSG00000027075	141.93	22.23	2.6639	2.7835e-11	1.6657e-09	38	110	81	198	32	38	31	26	Slc43a1	solute carrier family 43, member 1 [Source:MGI Symbol;Acc:MGI:1931352]
ENSMUSG00000073678	21.73	123.06	-2.6031	2.8864e-11	1.7222e-09	11	33	9	10	177	146	143	273	Pgap1	post-GPI attachment to proteins 1 [Source:MGI Symbol;Acc:MGI:2443342]
ENSMUSG00000064147	255.29	63.41	2.0277	2.991e-11	1.7794e-09	81	278	62	587	90	79	99	103	Rab44	RAB44, member RAS oncogene family [Source:MGI Symbol;Acc:MGI:3045302]
ENSMUSG00000104350	4.87	56.94	-3.5871	3.2178e-11	1.9032e-09	3	10	1	2	70	74	51	156	Gm38244	predicted gene, 38244 [Source:MGI Symbol;Acc:MGI:5611472]
ENSMUSG00000044573	225	59.25	1.8977	3.6921e-11	2.1774e-09	86	202	116	250	63	85	91	115	Acp1	acid phosphatase 1, soluble [Source:MGI Symbol;Acc:MGI:87881]
ENSMUSG00000040990	56.82	185.71	-1.611	3.7212e-11	2.1882e-09	19	95	11	104	210	259	273	368	Sh3kbp1	SH3-domain kinase binding protein 1 [Source:MGI Symbol;Acc:MGI:1889583]
ENSMUSG00000037235	20.13	86.37	-1.9782	3.8871e-11	2.2791e-09	6	37	5	31	135	115	103	154	Mxd4	Max dimerization protein 4 [Source:MGI Symbol;Acc:MGI:104991]
ENSMUSG00000035673	471.76	154.07	1.6245	4.0031e-11	2.3404e-09	205	545	105	904	239	193	210	259	Sbno2	strawberry notch 2 [Source:MGI Symbol;Acc:MGI:2448490]
ENSMUSG00000024521	121.82	23.91	2.3722	4.1377e-11	2.4121e-09	45	158	22	264	20	28	46	51	Pmaip1	phorbol-12-myristate-13-acetate-induced protein 1 [Source:MGI Symbol;Acc:MGI:1930146]
ENSMUSG00000042292	39.24	117.01	-1.4957	4.2412e-11	2.4654e-09	13	54	11	70	164	154	167	203	Mrtfa	myocardin related transcription factor A [Source:MGI Symbol;Acc:MGI:2384495]
ENSMUSG00000020826	49.71	0.31	7.246	4.2699e-11	2.4749e-09	10	56	13	128	0	0	1	1	Nos2	nitric oxide synthase 2, inducible [Source:MGI Symbol;Acc:MGI:97361]
ENSMUSG00000050029	290.09	121.75	1.2688	4.3446e-11	2.5111e-09	121	341	75	522	159	159	181	221	Rap2c	RAP2C, member of RAS oncogene family [Source:MGI Symbol;Acc:MGI:1919315]
ENSMUSG00000037280	34.5	95.89	-1.4254	4.5197e-11	2.6049e-09	13	51	10	51	114	127	135	199	Galnt6	polypeptide N-acetylgalactosaminyltransferase 6 [Source:MGI Symbol;Acc:MGI:1891640]
ENSMUSG00000086564	0.72	52.12	-5.5266	4.5517e-11	2.6159e-09	0	0	0	4	104	55	67	72	Cd101	CD101 antigen [Source:MGI Symbol;Acc:MGI:2685862]
ENSMUSG00000052142	44.78	172	-1.873	4.9393e-11	2.8227e-09	16	84	10	63	224	228	179	412	Rasal3	RAS protein activator like 3 [Source:MGI Symbol;Acc:MGI:2444128]
ENSMUSG00000027469	65.31	7.3	3.1618	5.2356e-11	2.9752e-09	14	48	30	137	6	11	15	11	Tpx2	TPX2, microtubule-associated [Source:MGI Symbol;Acc:MGI:1919369]
ENSMUSG00000025223	68.87	196.5	-1.4714	5.2768e-11	2.9902e-09	18	108	24	105	215	321	279	348	Ldb1	LIM domain binding 1 [Source:MGI Symbol;Acc:MGI:894762]
ENSMUSG00000032528	6.16	48.04	-2.8691	5.6854e-11	3.2128e-09	3	13	1	6	43	67	71	112	Vipr1	vasoactive intestinal peptide receptor 1 [Source:MGI Symbol;Acc:MGI:109272]
ENSMUSG00000036402	83.06	25.86	1.7156	5.7171e-11	3.2217e-09	34	94	23	149	37	32	41	41	Gng12	guanine nucleotide binding protein (G protein), gamma 12 [Source:MGI Symbol;Acc:MGI:1336171]
ENSMUSG00000105096	39.54	1.94	4.2987	5.7971e-11	3.2488e-09	10	51	8	98	0	2	3	8	Gbp10	guanylate-binding protein 10 [Source:MGI Symbol;Acc:MGI:4359647]
ENSMUSG00000074272	222.27	97.45	1.2152	5.7838e-11	3.2488e-09	81	290	61	394	118	139	135	188	Ceacam1	carcinoembryonic antigen-related cell adhesion molecule 1 [Source:MGI Symbol;Acc:MGI:1347245]
ENSMUSG00000029401	70.88	13.67	2.4229	6.2045e-11	3.4675e-09	20	87	20	149	20	26	13	20	Rilpl2	Rab interacting lysosomal protein-like 2 [Source:MGI Symbol;Acc:MGI:1933112]
ENSMUSG00000031400	198.22	89.88	1.1736	6.4434e-11	3.5911e-09	74	299	54	304	120	132	123	153	G6pdx	glucose-6-phosphate dehydrogenase X-linked [Source:MGI Symbol;Acc:MGI:105979]
ENSMUSG00000030413	202.99	64.87	1.663	6.8525e-11	3.8087e-09	85	248	56	339	99	88	107	77	Pglyrp1	peptidoglycan recognition protein 1 [Source:MGI Symbol;Acc:MGI:1345092]
ENSMUSG00000024222	203.05	63.26	1.6813	7.4063e-11	4.1052e-09	73	227	65	364	61	85	76	169	Fkbp5	FK506 binding protein 5 [Source:MGI Symbol;Acc:MGI:104670]
ENSMUSG00000026222	1699.4	587.92	1.5284	7.4953e-11	4.1432e-09	606	1622	802	2252	862	786	784	1019	Sp100	nuclear antigen Sp100 [Source:MGI Symbol;Acc:MGI:109561]
ENSMUSG00000047879	135.28	47.94	1.459	7.9277e-11	4.3704e-09	49	144	61	173	57	63	75	90	Usp14	ubiquitin specific peptidase 14 [Source:MGI Symbol;Acc:MGI:1928898]
ENSMUSG00000043740	181.14	46.37	1.9848	8.4558e-11	4.6489e-09	88	209	37	330	76	51	77	63	B430306N03Rik	RIKEN cDNA B430306N03 gene [Source:MGI Symbol;Acc:MGI:2443478]
ENSMUSG00000046897	87.37	184.58	-1.1104	8.5112e-11	4.6667e-09	36	118	32	102	232	254	275	330	Zfp740	zinc finger protein 740 [Source:MGI Symbol;Acc:MGI:1915994]
ENSMUSG00000032193	78.2	10.82	2.8984	8.6659e-11	4.7259e-09	15	88	23	193	16	14	19	13	Ldlr	low density lipoprotein receptor [Source:MGI Symbol;Acc:MGI:96765]
ENSMUSG00000033088	122.54	29.15	2.0749	8.6468e-11	4.7259e-09	25	143	53	219	39	41	34	60	Triobp	TRIO and F-actin binding protein [Source:MGI Symbol;Acc:MGI:1349410]
ENSMUSG00000112023	1997.27	407.85	2.2936	9.0462e-11	4.9201e-09	680	1738	551	4618	652	440	759	481	Lilr4b	leukocyte immunoglobulin-like receptor, subfamily B, member 4B [Source:MGI Symbol;Acc:MGI:102702]
ENSMUSG00000058446	56.61	167.28	-1.5767	9.182e-11	4.9806e-09	33	73	13	70	202	190	227	398	Znrf2	zinc and ring finger 2 [Source:MGI Symbol;Acc:MGI:1196246]
ENSMUSG00000030966	115.05	38.49	1.5833	9.6105e-11	5.1991e-09	40	142	40	183	32	60	67	71	Trim21	tripartite motif-containing 21 [Source:MGI Symbol;Acc:MGI:106657]
ENSMUSG00000050379	44.34	158.27	-1.8759	9.6465e-11	5.2048e-09	25	69	13	33	212	198	237	289	Septin6	septin 6 [Source:MGI Symbol;Acc:MGI:1888939]
ENSMUSG00000001763	778.15	149.54	2.3751	9.6941e-11	5.2166e-09	288	629	451	757	263	203	186	206	Tspan33	tetraspanin 33 [Source:MGI Symbol;Acc:MGI:1919012]
ENSMUSG00000039005	88	11.15	2.9912	9.7727e-11	5.245e-09	33	63	20	226	17	12	10	29	Tlr4	toll-like receptor 4 [Source:MGI Symbol;Acc:MGI:96824]
ENSMUSG00000061175	106.95	14.81	2.882	9.934e-11	5.3174e-09	32	97	30	256	33	12	20	19	Fnip2	folliculin interacting protein 2 [Source:MGI Symbol;Acc:MGI:2683054]
ENSMUSG00000040699	219.86	451.75	-1.0258	1.0105e-10	5.3945e-09	89	336	65	287	518	673	696	781	Limd2	LIM domain containing 2 [Source:MGI Symbol;Acc:MGI:1915053]
ENSMUSG00000057058	21.37	80	-1.9459	1.0748e-10	5.723e-09	10	33	7	20	77	120	129	152	Skap1	src family associated phosphoprotein 1 [Source:MGI Symbol;Acc:MGI:1925723]
ENSMUSG00000025059	170.01	37.95	2.1898	1.0804e-10	5.7375e-09	59	202	34	387	63	39	55	65	Gk	glycerol kinase [Source:MGI Symbol;Acc:MGI:106594]
ENSMUSG00000031537	114.67	247.58	-1.1047	1.2029e-10	6.3714e-09	55	148	31	162	352	298	331	491	Ikbkb	inhibitor of kappaB kinase beta [Source:MGI Symbol;Acc:MGI:1338071]
ENSMUSG00000036112	826.94	187.33	2.137	1.2091e-10	6.3876e-09	251	721	486	907	262	260	274	298	Metap2	methionine aminopeptidase 2 [Source:MGI Symbol;Acc:MGI:1929701]
ENSMUSG00000067297	56.45	8.54	2.7804	1.2189e-10	6.4229e-09	26	69	7	123	14	11	10	15	Ifit1bl2	interferon induced protein with tetratricopeptide repeats 1B like 2 [Source:MGI Symbol;Acc:MGI:2148249]
ENSMUSG00000026796	71.48	15.81	2.1933	1.2679e-10	6.6636e-09	34	61	18	141	18	24	25	26	Niban2	niban apoptosis regulator 2 [Source:MGI Symbol;Acc:MGI:2442910]
ENSMUSG00000045763	126.07	11.35	3.5081	1.3761e-10	7.2139e-09	27	122	27	366	19	15	22	7	Basp1	brain abundant, membrane attached signal protein 1 [Source:MGI Symbol;Acc:MGI:1917600]
ENSMUSG00000022651	1182.25	378.66	1.6448	1.3897e-10	7.2663e-09	531	1226	319	2116	520	515	673	471	Retnlg	resistin like gamma [Source:MGI Symbol;Acc:MGI:2667763]
ENSMUSG00000035596	215.33	102.06	1.094	1.4728e-10	7.6811e-09	79	271	69	348	142	132	153	172	Mboat7	membrane bound O-acyltransferase domain containing 7 [Source:MGI Symbol;Acc:MGI:1924832]
ENSMUSG00000039747	60.06	157.52	-1.3826	1.5151e-10	7.8812e-09	15	89	25	82	170	221	244	306	Orai2	ORAI calcium release-activated calcium modulator 2 [Source:MGI Symbol;Acc:MGI:2443195]
ENSMUSG00000026656	471.34	90.08	2.3962	1.6586e-10	8.6056e-09	141	467	88	1276	106	135	131	161	Fcgr2b	Fc receptor, IgG, low affinity IIb [Source:MGI Symbol;Acc:MGI:95499]
ENSMUSG00000044037	19.55	151.21	-2.9716	1.7586e-10	9.1013e-09	8	43	7	6	156	222	209	325	Als2cl	ALS2 C-terminal like [Source:MGI Symbol;Acc:MGI:2447532]
ENSMUSG00000056501	198.82	23.94	3.0746	1.7767e-10	9.1714e-09	47	228	34	561	25	49	38	25	Cebpb	CCAAT/enhancer binding protein (C/EBP), beta [Source:MGI Symbol;Acc:MGI:88373]
ENSMUSG00000030337	30.18	94.93	-1.7476	1.9131e-10	9.8506e-09	17	40	10	25	122	124	128	193	Vamp1	vesicle-associated membrane protein 1 [Source:MGI Symbol;Acc:MGI:1313276]
ENSMUSG00000052889	45.28	149.69	-1.7238	2.1026e-10	1.0799e-08	18	77	15	45	232	172	226	244	Prkcb	protein kinase C, beta [Source:MGI Symbol;Acc:MGI:97596]
ENSMUSG00000079227	92.48	11.55	3.0268	2.1454e-10	1.0991e-08	24	111	18	239	20	7	14	29	Ccr5	chemokine (C-C motif) receptor 5 [Source:MGI Symbol;Acc:MGI:107182]
ENSMUSG00000045664	53.43	7.56	2.8878	2.3168e-10	1.1839e-08	12	61	15	128	13	11	10	9	Cdc42ep2	CDC42 effector protein (Rho GTPase binding) 2 [Source:MGI Symbol;Acc:MGI:1929744]
ENSMUSG00000025017	418.39	118.79	1.8264	2.4645e-10	1.2562e-08	138	430	108	944	179	138	170	212	Pik3ap1	phosphoinositide-3-kinase adaptor protein 1 [Source:MGI Symbol;Acc:MGI:1933177]
ENSMUSG00000037731	476.39	159.89	1.5848	2.8254e-10	1.4365e-08	160	545	136	950	222	218	263	223	Themis2	thymocyte selection associated family member 2 [Source:MGI Symbol;Acc:MGI:2446213]
ENSMUSG00000023039	38.01	5.25	2.8869	2.8533e-10	1.4471e-08	24	37	7	61	10	6	7	7	Krt7	keratin 7 [Source:MGI Symbol;Acc:MGI:96704]
ENSMUSG00000068245	52.02	4.5	3.5819	2.8865e-10	1.4603e-08	12	42	13	149	5	10	5	6	Phf11d	PHD finger protein 11D [Source:MGI Symbol;Acc:MGI:1277133]
ENSMUSG00000016526	57.2	5.41	3.3891	3.1252e-10	1.5707e-08	9	58	37	68	11	7	5	8	Dyrk3	dual-specificity tyrosine-(Y)-phosphorylation regulated kinase 3 [Source:MGI Symbol;Acc:MGI:1330300]
ENSMUSG00000040061	32.45	103.4	-1.59	3.1279e-10	1.5707e-08	15	50	6	51	157	133	127	193	Plcb2	phospholipase C, beta 2 [Source:MGI Symbol;Acc:MGI:107465]
ENSMUSG00000110631	201.91	56.75	1.8365	3.1157e-10	1.5707e-08	68	198	74	367	71	74	111	72	Gm42047	predicted gene, 42047 [Source:MGI Symbol;Acc:MGI:5624932]
ENSMUSG00000028332	226.12	47.67	2.2452	3.1528e-10	1.5793e-08	76	140	94	451	72	72	59	74	Hemgn	hemogen [Source:MGI Symbol;Acc:MGI:2136910]
ENSMUSG00000026003	114.99	37.65	1.6334	3.2632e-10	1.6306e-08	43	120	33	226	50	55	47	71	Acadl	acyl-Coenzyme A dehydrogenase, long-chain [Source:MGI Symbol;Acc:MGI:87866]
ENSMUSG00000040247	21.3	80.71	-1.9242	3.3427e-10	1.6662e-08	16	28	2	26	108	107	98	170	Tbc1d10c	TBC1 domain family, member 10c [Source:MGI Symbol;Acc:MGI:1922072]
ENSMUSG00000002885	974.03	404.37	1.2741	3.3664e-10	1.6739e-08	375	1263	237	1797	490	558	503	883	Adgre5	adhesion G protein-coupled receptor E5 [Source:MGI Symbol;Acc:MGI:1347095]
ENSMUSG00000015243	43.15	121.72	-1.4835	3.4265e-10	1.6996e-08	21	48	11	71	153	150	154	279	Abca1	ATP-binding cassette, sub-family A (ABC1), member 1 [Source:MGI Symbol;Acc:MGI:99607]
[truncated: 2,177 more rows]

## Sheet: LPS-P_vs_PBS-P.DEG
gene_id	LPS-P_readcount	PBS-P_readcount	log2FoldChange	pvalue	padj	LPS-1-P	LPS-2-P	LPS-3-P	LPS-4-P	PBS-1-P	PBS-2-P	PBS-3-P	PBS-4-P	symbol	description
[truncated: 497 more rows]

[truncated: 2 more sheets: LPS-D_vs_PBS-D.DEG, LPS-C_vs_PBS-C.DEG]
